# Supplementary material for: Retinal Proteomic Analysis in a Mouse Model of Endotoxin-Induced Uveitis Using Data-Independent Acquisition-Based Mass Spectrometry
Source: MDPI journal article supplement (doi:10.3390/ijms23126464), 2022-06-09
Supplement: s1 [file s1]

**Table S1.** The full list of 3397 identified unique proteins at global 1% FDR (%Cov: coverage of proteins; %Cov(95) : protein sequence coverage in which the peptides were identified at 95% confidence; Peptide (95%): number of peptides at 95% confidence)

| No. | Unused score | Total score | %Cov  | %Cov(95) | Accession                      | Name                                                                                               | Species | Peptides (95%) |
|-----|--------------|-------------|-------|----------|--------------------------------|----------------------------------------------------------------------------------------------------|---------|----------------|
| 1   | 400.03       | 400.03      | 54.74 | 48.08    | sp Q9JHU4 DYHC1_MOUSE          | Cytoplasmic dynein 1 heavy chain 1 OS=Mus musculus OX=10090 GN=Dync1h1 PE=1 SV=2                   | MOUSE   | 218            |
| 2   | 320.95       | 320.92      | 72.98 | 68.21    | tr A3KGU5 A3KGU5_MOUSE         | Spectrin alpha chain, non-erythrocytic 1 OS=Mus musculus OX=10090 GN=Sptan1 PE=1 SV=1              | MOUSE   | 170            |
| 3   | 236.32       | 236.32      | 65.04 | 60.47    | sp Q62261 SPTB2_MOUSE          | Spectrin beta chain, non-erythrocytic 1 OS=Mus musculus OX=10090 GN=Sptbn1 PE=1 SV=2               | MOUSE   | 129            |
| 4   | 197.04       | 197.04      | 65.75 | 63.49    | tr Q5SXR6 Q5SXR6_MOUSE         | Clathrin heavy chain OS=Mus musculus OX=10090 GN=Cltc PE=1 SV=1                                    | MOUSE   | 139            |
| 5   | 164.18       | 164.17      | 55.52 | 50.28    | sp P14873 MAP1B_MOUSE          | Microtubule-associated protein 1B OS=Mus musculus OX=10090 GN=Map1b PE=1 SV=2                      | MOUSE   | 89             |
| 6   | 157.33       | 157.33      | 52.61 | 44.75    | sp Q8CJ40 CROCC_MOUSE          | Rootletin OS=Mus musculus OX=10090 GN=Crocc PE=1 SV=2                                              | MOUSE   | 87             |
| 7   | 137.13       | 137.13      | 70.24 | 63.87    | tr B6ZHD0 B6ZHD0_MOUSE         | Erythrocyte protein band 4.1-like 2 OS=Mus musculus OX=10090 GN=Epb41l2 PE=2 SV=1                  | MOUSE   | 84             |
| 8   | 133.66       | 133.64      | 93.32 | 92.40    | tr Q5FW97 Q5FW97_MOUSE         | 2-phospho-D-glycerate hydro-lyase OS=Mus musculus OX=10090 GN=EG433182 PE=1 SV=1                   | MOUSE   | 167            |
| 9   | 129.03       | 129.39      | 85.69 | 82.86    | sp P52480 KPYM_MOUSE           | Pyruvate kinase PKM OS=Mus musculus OX=10090 GN=Pkm PE=1 SV=4                                      | MOUSE   | 122            |
| 10  | 127.18       | 127.18      | 58.48 | 56.24    | tr A0A0G2JGX4 A0A0G2JGX4_MOUSE | Sodium/potassium-transporting ATPase subunit alpha OS=Mus musculus OX=10090 GN=Atp1a3 PE=1 SV=1    | MOUSE   | 94             |
| 11  | 121.53       | 121.53      | 75.40 | 68.68    | sp P46460 NSF_MOUSE            | Vesicle-fusing ATPase OS=Mus musculus OX=10090 GN=Nsf PE=1 SV=2                                    | MOUSE   | 66             |
| 12  | 119.88       | 119.88      | 92.56 | 92.31    | tr Q3UPX6 Q3UPX6_MOUSE         | Arrestin_C domain-containing protein OS=Mus musculus OX=10090 GN=Sag PE=2 SV=1                     | MOUSE   | 126            |
| 13  | 116.78       | 116.89      | 39.87 | 30.84    | sp Q99PV0 PRP8_MOUSE           | Pre-mRNA-processing-splicing factor 8 OS=Mus musculus OX=10090 GN=Prpf8 PE=1 SV=2                  | MOUSE   | 60             |
| 14  | 115.65       | 115.71      | 43.59 | 37.03    | sp Q6P4T2 U520_MOUSE           | U5 small nuclear ribonucleoprotein 200 kDa helicase OS=Mus musculus OX=10090 GN=Snrnp200 PE=1 SV=1 | MOUSE   | 59             |

|    |        |        |       |       |                                |                                                                                                           |       |    |
|----|--------|--------|-------|-------|--------------------------------|-----------------------------------------------------------------------------------------------------------|-------|----|
| 15 | 115.61 | 115.61 | 64.53 | 61.51 | tr Q8K0A8 Q8K0A8_MOUSE         | Phosphodiesterase OS=Mus musculus OX=10090 GN=Pde6a PE=1 SV=1                                             | MOUSE | 69 |
| 16 | 111.82 | 111.82 | 64.94 | 62.89 | tr Q80Y52 Q80Y52_MOUSE         | Heat shock protein 90, alpha (Cytosolic), class A member 1 OS=Mus musculus OX=10090 GN=Hsp90aa1 PE=1 SV=2 | MOUSE | 68 |
| 17 | 111.5  | 111.53 | 38.87 | 32.38 | sp O35600 ABCA4_MOUSE          | Retinal-specific phospholipid-transporting ATPase ABCA4 OS=Mus musculus OX=10090 GN=Abca4 PE=2 SV=1       | MOUSE | 57 |
| 18 | 110.03 | 110.03 | 63.73 | 59.37 | tr Q6GQU1 Q6GQU1_MOUSE         | Hexokinase OS=Mus musculus OX=10090 GN=Hk1 PE=2 SV=1                                                      | MOUSE | 59 |
| 19 | 109.2  | 109.22 | 76.09 | 72.39 | sp O08599 STXB1_MOUSE          | Syntaxin-binding protein 1 OS=Mus musculus OX=10090 GN=Stxbp1 PE=1 SV=2                                   | MOUSE | 71 |
| 20 | 108.11 | 108.12 | 28.91 | 19.03 | tr S4R2F3 S4R2F3_MOUSE         | Ankyrin-2 OS=Mus musculus OX=10090 GN=Ank2 PE=1 SV=3                                                      | MOUSE | 51 |
| 21 | 107.15 | 107.15 | 42.49 | 31.75 | sp P19096 FAS_MOUSE            | Fatty acid synthase OS=Mus musculus OX=10090 GN=Fasn PE=1 SV=2                                            | MOUSE | 55 |
| 22 | 106.7  | 106.69 | 61.72 | 60.96 | tr B9EHN0 B9EHN0_MOUSE         | Ubiquitin-activating enzyme E1 OS=Mus musculus OX=10090 GN=Uba1 PE=1 SV=1                                 | MOUSE | 67 |
| 23 | 106.11 | 106.12 | 83.26 | 80.47 | tr Q5FWJ3 Q5FWJ3_MOUSE         | Vimentin OS=Mus musculus OX=10090 GN=Vim PE=1 SV=1                                                        | MOUSE | 66 |
| 24 | 105    | 105.03 | 73.64 | 69.90 | sp P14733 LMNB1_MOUSE          | Lamin-B1 OS=Mus musculus OX=10090 GN=Lmn1 PE=1 SV=3                                                       | MOUSE | 62 |
| 25 | 104.66 | 105.05 | 42.52 | 31.99 | tr Q3UH59 Q3UH59_MOUSE         | Myosin-10 OS=Mus musculus OX=10090 GN=Myh10 PE=1 SV=1                                                     | MOUSE | 51 |
| 26 | 103.32 | 103.32 | 61.35 | 60.45 | tr A0A0R4J0H3 A0A0R4J0H3_MOUSE | Retinol-binding protein 3 OS=Mus musculus OX=10090 GN=Rbp3 PE=1 SV=1                                      | MOUSE | 57 |
| 27 | 103.22 | 103.22 | 74.14 | 70.52 | sp Q03265 ATPA_MOUSE           | ATP synthase subunit alpha, mitochondrial OS=Mus musculus OX=10090 GN=Atp5f1a PE=1 SV=1                   | MOUSE | 75 |
| 28 | 102.42 | 102.46 | 55.22 | 47.15 | sp Q80TJ1-4 CAPS1_MOUSE        | Isoform 4 of Calcium-dependent secretion activator 1 OS=Mus musculus OX=10090 GN=Cadps                    | MOUSE | 53 |
| 29 | 101.57 | 102.16 | 46.34 | 39.95 | sp Q64511 TOP2B_MOUSE          | DNA topoisomerase 2-beta OS=Mus musculus OX=10090 GN=Top2b PE=1 SV=2                                      | MOUSE | 53 |
| 30 | 101.45 | 101.46 | 47.18 | 45.09 | tr E9QNN1 E9QNN1_MOUSE         | DEAH box protein 9 OS=Mus musculus OX=10090 GN=Dhx9 PE=1 SV=1                                             | MOUSE | 55 |
| 31 | 100.64 | 100.66 | 65.63 | 63.31 | tr A0A0J9YUN4 A0A0J9YUN4_MOUSE | Dynamin GTPase OS=Mus musculus OX=10090 GN=Dnm1 PE=1 SV=1                                                 | MOUSE | 61 |

|    |       |       |       |       |                        |                                                                                            |       |     |
|----|-------|-------|-------|-------|------------------------|--------------------------------------------------------------------------------------------|-------|-----|
| 32 | 99.48 | 99.48 | 70.47 | 67.12 | sp Q01853 TERA_MOUSE   | Transitional endoplasmic reticulum ATPase OS=Mus musculus OX=10090 GN=Vcp PE=1 SV=4        | MOUSE | 62  |
| 33 | 98.33 | 98.34 | 84.38 | 84.38 | tr D2KHZ9 D2KHZ9_MOUSE | Glyceraldehyde-3-phosphate dehydrogenase OS=Mus musculus OX=10090 GN=Gapdh PE=2 SV=1       | MOUSE | 144 |
| 34 | 95.71 | 95.71 | 87.42 | 86.74 | sp P68372 TBB4B_MOUSE  | Tubulin beta-4B chain OS=Mus musculus OX=10090 GN=Tubb4b PE=1 SV=1                         | MOUSE | 131 |
| 35 | 95.01 | 95.02 | 98.08 | 94.24 | sp P09411 PGK1_MOUSE   | Phosphoglycerate kinase 1 OS=Mus musculus OX=10090 GN=Pgk1 PE=1 SV=4                       | MOUSE | 78  |
| 36 | 93.02 | 93.02 | 96.67 | 96.01 | sp P68369 TBA1A_MOUSE  | Tubulin alpha-1A chain OS=Mus musculus OX=10090 GN=Tuba1a PE=1 SV=1                        | MOUSE | 115 |
| 37 | 89.48 | 89.48 | 69.81 | 68.27 | tr Q3TQ13 Q3TQ13_MOUSE | Uncharacterized protein OS=Mus musculus OX=10090 GN=Hspa8 PE=2 SV=1                        | MOUSE | 75  |
| 38 | 89.39 | 89.4  | 85.25 | 83.95 | sp P50516 VATA_MOUSE   | V-type proton ATPase catalytic subunit A OS=Mus musculus OX=10090 GN=Atp6v1a PE=1 SV=2     | MOUSE | 50  |
| 39 | 88.42 | 88.44 | 51.39 | 50.13 | sp P13595 NCAM1_MOUSE  | Neural cell adhesion molecule 1 OS=Mus musculus OX=10090 GN=Ncam1 PE=1 SV=3                | MOUSE | 67  |
| 40 | 87.22 | 87.22 | 64.92 | 57.11 | tr Q3UMI7 Q3UMI7_MOUSE | Tr-type G domain-containing protein OS=Mus musculus OX=10090 GN=Eef2 PE=2 SV=1             | MOUSE | 47  |
| 41 | 87.21 | 87.22 | 71.03 | 63.85 | sp Q99KI0 ACON_MOUSE   | Aconitate hydratase, mitochondrial OS=Mus musculus OX=10090 GN=Aco2 PE=1 SV=1              | MOUSE | 45  |
| 42 | 86.47 | 86.48 | 67.10 | 61.40 | tr Q571M2 Q571M2_MOUSE | Heat shock 70 kDa protein 4 (Fragment) OS=Mus musculus OX=10090 GN=Hspa4 PE=2 SV=1         | MOUSE | 46  |
| 43 | 85.29 | 85.29 | 64.22 | 54.88 | tr Q8CC13 Q8CC13_MOUSE | AP complex subunit beta OS=Mus musculus OX=10090 GN=Ap1b1 PE=2 SV=1                        | MOUSE | 50  |
| 44 | 85.11 | 85.11 | 53.95 | 50.68 | tr Q3V117 Q3V117_MOUSE | ATP-citrate synthase OS=Mus musculus OX=10090 GN=Ady PE=1 SV=1                             | MOUSE | 44  |
| 45 | 84.8  | 84.9  | 52.13 | 44.10 | sp G5E829 AT2B1_MOUSE  | Plasma membrane calcium-transporting ATPase 1 OS=Mus musculus OX=10090 GN=Atp2b1 PE=1 SV=1 | MOUSE | 45  |
| 46 | 83.78 | 83.79 | 91.48 | 90.38 | tr Q5FWB7 Q5FWB7_MOUSE | Fructose-bisphosphate aldolase OS=Mus musculus OX=10090 GN=Aldoa PE=1 SV=1                 | MOUSE | 91  |
| 47 | 82.92 | 82.93 | 49.51 | 44.55 | sp Q6ZQ38 CAND1_MOUSE  | Cullin-associated NEDD8-dissociated protein 1 OS=Mus musculus OX=10090 GN=Cand1 PE=1 SV=2  | MOUSE | 47  |
| 48 | 82.67 | 82.71 | 89.16 | 87.35 | tr Q564E2 Q564E2_MOUSE | L-lactate dehydrogenase OS=Mus musculus OX=10090 GN=Ldha PE=1 SV=1                         | MOUSE | 63  |

|    |       |       |       |       |                                |                                                                                           |       |    |
|----|-------|-------|-------|-------|--------------------------------|-------------------------------------------------------------------------------------------|-------|----|
| 49 | 80.82 | 80.84 | 41.11 | 25.45 | tr E9PUM4 E9PUM4_MOUSE         | Talin-2 OS=Mus musculus OX=10090 GN=Tln2 PE=1 SV=1                                        | MOUSE | 43 |
| 50 | 80.55 | 80.55 | 80.42 | 76.57 | sp P40142 TKT_MOUSE            | Transketolase OS=Mus musculus OX=10090 GN=Tkt PE=1 SV=1                                   | MOUSE | 55 |
| 51 | 79.12 | 84.72 | 71.00 | 64.80 | sp P48722 HS74L_MOUSE          | Heat shock 70 kDa protein 4L OS=Mus musculus OX=10090 GN=Hspa4l PE=1 SV=2                 | MOUSE | 48 |
| 52 | 76.54 | 76.54 | 53.47 | 44.61 | sp Q60597-3 ODO1_MOUSE         | Isoform 3 of 2-oxoglutarate dehydrogenase, mitochondrial OS=Mus musculus OX=10090 GN=Ogdh | MOUSE | 38 |
| 53 | 76.16 | 76.16 | 58.08 | 51.07 | sp Q9WUB3 PYGM_MOUSE           | Glycogen phosphorylase, muscle form OS=Mus musculus OX=10090 GN=Pygm PE=1 SV=3            | MOUSE | 37 |
| 54 | 75.62 | 75.62 | 80.97 | 77.75 | tr E9PWE8 E9PWE8_MOUSE         | Dihydropyrimidinase-related protein 3 OS=Mus musculus OX=10090 GN=Dpysl3 PE=1 SV=1        | MOUSE | 46 |
| 55 | 75.01 | 75.04 | 56.61 | 51.17 | tr Q6PEE6 Q6PEE6_MOUSE         | AP-2 complex subunit alpha OS=Mus musculus OX=10090 GN=Ap2a2 PE=2 SV=1                    | MOUSE | 39 |
| 56 | 74.39 | 74.41 | 73.19 | 67.11 | tr Q546G4 Q546G4_MOUSE         | Serum albumin OS=Mus musculus OX=10090 GN=Alb PE=1 SV=1                                   | MOUSE | 39 |
| 57 | 74.3  | 74.3  | 57.38 | 52.50 | tr Q3TVV6 Q3TVV6_MOUSE         | Uncharacterized protein OS=Mus musculus OX=10090 GN=Hnrnpu PE=2 SV=1                      | MOUSE | 55 |
| 58 | 74.25 | 74.27 | 64.16 | 52.68 | tr A0A1L1SV25 A0A1L1SV25_MOUSE | Alpha-actinin-4 OS=Mus musculus OX=10090 GN=Actn4 PE=1 SV=1                               | MOUSE | 40 |
| 59 | 73.28 | 73.3  | 77.85 | 76.06 | sp P50396 GDIA_MOUSE           | Rab GDP dissociation inhibitor alpha OS=Mus musculus OX=10090 GN=Gdi1 PE=1 SV=3           | MOUSE | 44 |
| 60 | 71.86 | 71.86 | 68.32 | 52.54 | sp Q7TSJ2 MAP6_MOUSE           | Microtubule-associated protein 6 OS=Mus musculus OX=10090 GN=Map6 PE=1 SV=2               | MOUSE | 36 |
| 61 | 71.84 | 72.86 | 85.83 | 83.73 | sp Q04447 KCRB_MOUSE           | Creatine kinase B-type OS=Mus musculus OX=10090 GN=Ckb PE=1 SV=1                          | MOUSE | 95 |
| 62 | 71.7  | 71.72 | 54.76 | 52.38 | tr A1A4T2 A1A4T2_MOUSE         | Alpha glucosidase 2 alpha neutral subunit OS=Mus musculus OX=10090 GN=Ganab PE=2 SV=1     | MOUSE | 41 |
| 63 | 71.47 | 71.49 | 43.25 | 41.93 | sp Q3U1J4 DDB1_MOUSE           | DNA damage-binding protein 1 OS=Mus musculus OX=10090 GN=Ddb1 PE=1 SV=2                   | MOUSE | 39 |
| 64 | 71.38 | 71.43 | 47.13 | 33.31 | tr F7BQW7 F7BQW7_MOUSE         | Phosphoinositide 5-phosphatase (Fragment) OS=Mus musculus OX=10090 GN=Synj1 PE=1 SV=1     | MOUSE | 34 |
| 65 | 71.36 | 71.37 | 75.22 | 68.06 | sp P63038 CH60_MOUSE           | 60 kDa heat shock protein, mitochondrial OS=Mus musculus OX=10090 GN=Hspd1 PE=1 SV=1      | MOUSE | 40 |

|    |       |       |       |       |                        |                                                                                                           |       |    |
|----|-------|-------|-------|-------|------------------------|-----------------------------------------------------------------------------------------------------------|-------|----|
| 66 | 71.35 | 71.38 | 87.20 | 86.40 | tr Q3UAF7 Q3UAF7_MOUSE | Uncharacterized protein OS=Mus musculus OX=10090 GN=Actb PE=2 SV=1                                        | MOUSE | 88 |
| 67 | 71.19 | 71.22 | 85.25 | 82.31 | sp P15105 GLNA_MOUSE   | Glutamine synthetase OS=Mus musculus OX=10090 GN=Glul PE=1 SV=6                                           | MOUSE | 94 |
| 68 | 71.11 | 71.17 | 56.59 | 52.68 | tr Q8BTS0 Q8BTS0_MOUSE | DEAD box protein 5 OS=Mus musculus OX=10090 GN=Ddx5 PE=1 SV=1                                             | MOUSE | 44 |
| 69 | 70.74 | 70.84 | 63.51 | 53.51 | sp Q91VR5 DDX1_MOUSE   | ATP-dependent RNA helicase DDX1 OS=Mus musculus OX=10090 GN=Ddx1 PE=1 SV=1                                | MOUSE | 36 |
| 70 | 69.64 | 69.64 | 53.80 | 46.63 | sp Q11011 PSA_MOUSE    | Puromycin-sensitive aminopeptidase OS=Mus musculus OX=10090 GN=Npepps PE=1 SV=2                           | MOUSE | 38 |
| 71 | 69.47 | 69.55 | 16.27 | 5.90  | tr E9PVY8 E9PVY8_MOUSE | Microtubule-actin cross-linking factor 1 OS=Mus musculus OX=10090 GN=Macf1 PE=1 SV=2                      | MOUSE | 32 |
| 72 | 69.33 | 69.33 | 54.86 | 46.88 | tr Q91V38 Q91V38_MOUSE | Heat shock protein 90, beta (Grp94), member 1 OS=Mus musculus OX=10090 GN=Hsp90b1 PE=2 SV=1               | MOUSE | 36 |
| 73 | 69.17 | 69.18 | 56.38 | 52.93 | sp Q9WUA3 PFKAP_MOUSE  | ATP-dependent 6-phosphofructokinase, platelet type OS=Mus musculus OX=10090 GN=Pfkip PE=1 SV=1            | MOUSE | 38 |
| 74 | 68.66 | 68.67 | 60.66 | 57.63 | sp Q91VD9 NDUS1_MOUSE  | NADH-ubiquinone oxidoreductase 75 kDa subunit, mitochondrial OS=Mus musculus OX=10090 GN=Ndufs1 PE=1 SV=2 | MOUSE | 36 |
| 75 | 68.5  | 68.55 | 34.03 | 22.87 | tr D3YZ62 D3YZ62_MOUSE | Unconventional myosin-Va OS=Mus musculus OX=10090 GN=Myo5a PE=1 SV=1                                      | MOUSE | 36 |
| 76 | 67.51 | 67.51 | 83.29 | 80.87 | sp P05201 AATC_MOUSE   | Aspartate aminotransferase, cytoplasmic OS=Mus musculus OX=10090 GN=Got1 PE=1 SV=3                        | MOUSE | 50 |
| 77 | 67.45 | 73.48 | 71.57 | 66.91 | tr Q6P1J1 Q6P1J1_MOUSE | Crmp1 protein OS=Mus musculus OX=10090 GN=Crmp1 PE=1 SV=1                                                 | MOUSE | 42 |
| 78 | 66.81 | 66.81 | 46.13 | 44.72 | tr Q6ZQ61 Q6ZQ61_MOUSE | MKIAA0723 protein (Fragment) OS=Mus musculus OX=10090 GN=Matr3 PE=2 SV=1                                  | MOUSE | 37 |
| 79 | 66.79 | 66.8  | 65.77 | 62.01 | sp P06745 G6PI_MOUSE   | Glucose-6-phosphate isomerase OS=Mus musculus OX=10090 GN=Gpi PE=1 SV=4                                   | MOUSE | 52 |
| 80 | 66.66 | 66.72 | 49.92 | 35.36 | tr E9Q3M3 E9Q3M3_MOUSE | Dynactin subunit 1 OS=Mus musculus OX=10090 GN=Dctn1 PE=1 SV=1                                            | MOUSE | 34 |
| 81 | 65.21 | 78.34 | 52.24 | 50.49 | sp O08528 HXK2_MOUSE   | Hexokinase-2 OS=Mus musculus OX=10090 GN=Hk2 PE=1 SV=1                                                    | MOUSE | 44 |

|    |       |       |       |       |                         |                                                                                                         |       |    |
|----|-------|-------|-------|-------|-------------------------|---------------------------------------------------------------------------------------------------------|-------|----|
| 82 | 65.14 | 94.03 | 57.61 | 52.34 | tr A2VDG2 A2VDG2_MOUSE  | Phosphodiesterase (Fragment) OS=Mus musculus<br>OX=10090 GN=Pde6b PE=2 SV=1                             | MOUSE | 61 |
| 83 | 65.03 | 65.05 | 51.00 | 44.10 | tr G5E866 G5E866_MOUSE  | Splicing factor 3B subunit 1 OS=Mus musculus OX=10090<br>GN=Sf3b1 PE=1 SV=1                             | MOUSE | 37 |
| 84 | 64.83 | 64.84 | 69.13 | 64.11 | sp Q8BH59 CMC1_MOUSE    | Calcium-binding mitochondrial carrier protein Aralar1<br>OS=Mus musculus OX=10090 GN=Slc25a12 PE=1 SV=1 | MOUSE | 35 |
| 85 | 64.8  | 64.86 | 69.71 | 68.86 | sp P20612 GNAT1_MOUSE   | Guanine nucleotide-binding protein G(t) subunit alpha-1<br>OS=Mus musculus OX=10090 GN=Gnat1 PE=1 SV=3  | MOUSE | 55 |
| 86 | 64.66 | 64.71 | 84.70 | 69.97 | sp O88569 ROA2_MOUSE    | Heterogeneous nuclear ribonucleoproteins A2/B1 OS=Mus<br>musculus OX=10090 GN=Hnrnpa2b1 PE=1 SV=2       | MOUSE | 49 |
| 87 | 64.64 | 64.7  | 68.28 | 51.11 | tr Q5F2D0 Q5F2D0_MOUSE  | Uncharacterized protein OS=Mus musculus OX=10090<br>GN=Acsl6 PE=2 SV=1                                  | MOUSE | 33 |
| 88 | 64.08 | 64.14 | 74.24 | 65.08 | tr Q66JR7 Q66JR7_MOUSE  | Pgm2 protein (Fragment) OS=Mus musculus OX=10090<br>GN=Pgm1 PE=2 SV=1                                   | MOUSE | 36 |
| 89 | 63.83 | 63.94 | 77.44 | 75.35 | sp P05202 AATM_MOUSE    | Aspartate aminotransferase, mitochondrial OS=Mus<br>musculus OX=10090 GN=Got2 PE=1 SV=1                 | MOUSE | 51 |
| 90 | 63.72 | 63.89 | 66.19 | 57.49 | sp P56546-2 CTBP2_MOUSE | Isoform 2 of C-terminal-binding protein 2 OS=Mus<br>musculus OX=10090 GN=Ctbp2                          | MOUSE | 37 |
| 91 | 63.65 | 63.7  | 76.75 | 73.16 | sp P56480 ATPB_MOUSE    | ATP synthase subunit beta, mitochondrial OS=Mus<br>musculus OX=10090 GN=Atp5f1b PE=1 SV=2               | MOUSE | 61 |
| 92 | 63.61 | 63.67 | 45.22 | 36.82 | sp P52785 GUC2E_MOUSE   | Retinal guanylyl cyclase 1 OS=Mus musculus OX=10090<br>GN=Gucy2e PE=1 SV=2                              | MOUSE | 31 |
| 93 | 63.54 | 63.66 | 70.13 | 68.12 | sp P48962 ADT1_MOUSE    | ADP/ATP translocase 1 OS=Mus musculus OX=10090<br>GN=Slc25a4 PE=1 SV=4                                  | MOUSE | 54 |
| 94 | 63.24 | 63.47 | 51.65 | 45.57 | sp Q8CAQ8-5 MIC60_MOUSE | Isoform 5 of MICOS complex subunit Mic60 OS=Mus<br>musculus OX=10090 GN=Immt                            | MOUSE | 32 |
| 95 | 61.85 | 61.85 | 25.41 | 13.85 | tr B0V2P5 B0V2P5_MOUSE  | DmX-like protein 2 OS=Mus musculus OX=10090<br>GN=Dmxl2 PE=1 SV=1                                       | MOUSE | 30 |
| 96 | 61.6  | 71.7  | 82.34 | 81.12 | sp O08553 DPYL2_MOUSE   | Dihydropyrimidinase-related protein 2 OS=Mus musculus<br>OX=10090 GN=Dpysl2 PE=1 SV=2                   | MOUSE | 66 |
| 97 | 61.5  | 66.22 | 59.24 | 54.81 | tr Q3U9G2 Q3U9G2_MOUSE  | 78 kDa glucose-regulated protein OS=Mus musculus<br>OX=10090 GN=Hspa5 PE=2 SV=1                         | MOUSE | 40 |

|     |       |       |       |       |                                |                                                                                                                                       |       |    |
|-----|-------|-------|-------|-------|--------------------------------|---------------------------------------------------------------------------------------------------------------------------------------|-------|----|
| 98  | 60.52 | 60.53 | 59.08 | 54.65 | tr A0A3B2WCD8 A0A3B2WCD8_MOUSE | Far upstream element-binding protein 2 OS=Mus musculus<br>OX=10090 GN=Khsrp PE=1 SV=1                                                 | MOUSE | 49 |
| 99  | 60.51 | 61.18 | 42.88 | 34.01 | tr V9GXM4 V9GXM4_MOUSE         | Unconventional myosin-6 OS=Mus musculus OX=10090<br>GN=Myo6 PE=1 SV=1                                                                 | MOUSE | 32 |
| 100 | 60.23 | 60.23 | 72.90 | 71.40 | tr Q542X7 Q542X7_MOUSE         | CCT-beta OS=Mus musculus OX=10090 GN=Cct2 PE=1<br>SV=1                                                                                | MOUSE | 34 |
| 101 | 60.11 | 60.11 | 68.03 | 65.66 | sp P61979 HNRPK_MOUSE          | Heterogeneous nuclear ribonucleoprotein K OS=Mus<br>musculus OX=10090 GN=Hnrnpk PE=1 SV=1                                             | MOUSE | 38 |
| 102 | 59.91 | 59.96 | 42.95 | 35.57 | sp Q6P5F9 XPO1_MOUSE           | Exportin-1 OS=Mus musculus OX=10090 GN=Xpo1 PE=1<br>SV=1                                                                              | MOUSE | 29 |
| 103 | 59.89 | 59.9  | 35.08 | 34.37 | tr Q8CD23 Q8CD23_MOUSE         | Nucleolin OS=Mus musculus OX=10090 GN=Ncl PE=2 SV=1                                                                                   | MOUSE | 32 |
| 104 | 59.65 | 59.66 | 63.67 | 63.33 | sp Q76MZ3 2AAA_MOUSE           | Serine/threonine-protein phosphatase 2A 65 kDa<br>regulatory subunit A alpha isoform OS=Mus musculus<br>OX=10090 GN=Ppp2r1a PE=1 SV=3 | MOUSE | 36 |
| 105 | 59.62 | 59.67 | 54.99 | 41.57 | sp Q99P72 RTN4_MOUSE           | Reticulon-4 OS=Mus musculus OX=10090 GN=Rtn4 PE=1<br>SV=2                                                                             | MOUSE | 34 |
| 106 | 59.19 | 59.19 | 36.54 | 36.42 | tr Q6NXX6 Q6NXX6_MOUSE         | V-type proton ATPase subunit a OS=Mus musculus<br>OX=10090 GN=Atp6v0a1 PE=2 SV=1                                                      | MOUSE | 33 |
| 107 | 59.14 | 59.16 | 58.43 | 56.06 | tr H6RXZ1 H6RXZ1_MOUSE         | Synaptotagmin OS=Mus musculus OX=10090 GN=Syt1<br>PE=1 SV=1                                                                           | MOUSE | 33 |
| 108 | 59.09 | 73.64 | 93.94 | 87.05 | sp P05063 ALDOC_MOUSE          | Fructose-bisphosphate aldolase C OS=Mus musculus<br>OX=10090 GN=Aldoc PE=1 SV=4                                                       | MOUSE | 59 |
| 109 | 58.62 | 58.7  | 83.17 | 67.51 | sp P62814 VATB2_MOUSE          | V-type proton ATPase subunit B, brain isoform OS=Mus<br>musculus OX=10090 GN=Atp6v1b2 PE=1 SV=1                                       | MOUSE | 38 |
| 110 | 58.49 | 58.5  | 48.55 | 43.52 | tr Q3UKJ6 Q3UKJ6_MOUSE         | RNA helicase OS=Mus musculus OX=10090 GN=Dhx15<br>PE=1 SV=1                                                                           | MOUSE | 33 |
| 111 | 58.46 | 58.47 | 65.47 | 62.05 | sp P11983 TCPA_MOUSE           | T-complex protein 1 subunit alpha OS=Mus musculus<br>OX=10090 GN=Tcp1 PE=1 SV=3                                                       | MOUSE | 34 |
| 112 | 58.41 | 58.46 | 65.57 | 55.42 | sp Q9D0E1 HNRPM_MOUSE          | Heterogeneous nuclear ribonucleoprotein M OS=Mus<br>musculus OX=10090 GN=Hnrnpm PE=1 SV=3                                             | MOUSE | 34 |
| 113 | 58.33 | 58.45 | 32.34 | 18.61 | tr Q5DTP7 Q5DTP7_MOUSE         | DNA helicase (Fragment) OS=Mus musculus OX=10090<br>GN=Chd4 PE=2 SV=1                                                                 | MOUSE | 31 |

|     |       |       |       |       |                         |                                                                                                         |       |    |
|-----|-------|-------|-------|-------|-------------------------|---------------------------------------------------------------------------------------------------------|-------|----|
| 114 | 58    | 58.09 | 50.25 | 39.93 | sp P48193-2 EPB41_MOUSE | Isoform 2 of Protein 4.1 OS=Mus musculus OX=10090 GN=Epb41                                              | MOUSE | 30 |
| 115 | 57.86 | 57.89 | 64.36 | 59.04 | tr G3X905 G3X905_MOUSE  | G protein-coupled receptor kinase OS=Mus musculus OX=10090 GN=Grk1 PE=1 SV=1                            | MOUSE | 31 |
| 116 | 57.77 | 57.82 | 49.93 | 48.93 | sp Q8VIJ6 SFPQ_MOUSE    | Splicing factor, proline- and glutamine-rich OS=Mus musculus OX=10090 GN=Sfpq PE=1 SV=1                 | MOUSE | 36 |
| 117 | 57.7  | 57.71 | 42.63 | 36.20 | sp Q5SUR0 PUR4_MOUSE    | Phosphoribosylformylglycinamidase synthase OS=Mus musculus OX=10090 GN=Pfas PE=1 SV=1                   | MOUSE | 34 |
| 118 | 57.45 | 57.63 | 73.75 | 63.96 | sp P80316 TCPE_MOUSE    | T-complex protein 1 subunit epsilon OS=Mus musculus OX=10090 GN=Cct5 PE=1 SV=1                          | MOUSE | 32 |
| 119 | 57.38 | 57.41 | 66.97 | 55.47 | tr Q3UL22 Q3UL22_MOUSE  | CCT-theta OS=Mus musculus OX=10090 GN=Cct8 PE=1 SV=1                                                    | MOUSE | 32 |
| 120 | 56.92 | 56.93 | 91.76 | 91.76 | tr Q3TQ70 Q3TQ70_MOUSE  | Beta1 subunit of GTP-binding protein OS=Mus musculus OX=10090 GN=Gnb1 PE=1 SV=1                         | MOUSE | 72 |
| 121 | 56.75 | 56.76 | 71.30 | 69.82 | sp P08249 MDHM_MOUSE    | Malate dehydrogenase, mitochondrial OS=Mus musculus OX=10090 GN=Mdh2 PE=1 SV=3                          | MOUSE | 35 |
| 122 | 56.69 | 56.71 | 77.20 | 74.80 | sp P61922 GABT_MOUSE    | 4-aminobutyrate aminotransferase, mitochondrial OS=Mus musculus OX=10090 GN=Abat PE=1 SV=1              | MOUSE | 34 |
| 123 | 56.54 | 56.57 | 35.32 | 26.32 | sp Q8CGC7 SYEP_MOUSE    | Bifunctional glutamate/proline-tRNA ligase OS=Mus musculus OX=10090 GN=Eprs1 PE=1 SV=4                  | MOUSE | 30 |
| 124 | 56.27 | 56.3  | 51.81 | 43.62 | sp Q00PI9 HNRL2_MOUSE   | Heterogeneous nuclear ribonucleoprotein U-like protein 2 OS=Mus musculus OX=10090 GN=Hnrnpul2 PE=1 SV=2 | MOUSE | 32 |
| 125 | 56.08 | 56.14 | 54.96 | 49.78 | sp Q8K0U4 HS12A_MOUSE   | Heat shock 70 kDa protein 12A OS=Mus musculus OX=10090 GN=Hspa12a PE=1 SV=1                             | MOUSE | 28 |
| 126 | 55.78 | 55.79 | 52.67 | 48.99 | tr Q3THQ5 Q3THQ5_MOUSE  | Uncharacterized protein OS=Mus musculus OX=10090 GN=Stip1 PE=2 SV=1                                     | MOUSE | 30 |
| 127 | 55.72 | 55.75 | 75.00 | 69.15 | sp Q9EQF6 DPYL5_MOUSE   | Dihydropyrimidinase-related protein 5 OS=Mus musculus OX=10090 GN=Dpysl5 PE=1 SV=1                      | MOUSE | 29 |
| 128 | 55.67 | 55.68 | 68.62 | 60.92 | tr Q3U4U6 Q3U4U6_MOUSE  | T-complex protein 1 subunit gamma OS=Mus musculus OX=10090 GN=Cct3 PE=1 SV=1                            | MOUSE | 31 |
| 129 | 55.18 | 75.87 | 64.19 | 55.27 | sp Q8BZ98 DYN3_MOUSE    | Dynamin-3 OS=Mus musculus OX=10090 GN=Dnm3 PE=1 SV=1                                                    | MOUSE | 43 |
| 130 | 54.74 | 74.06 | 33.06 | 24.85 | sp Q8VDD5 MYH9_MOUSE    | Myosin-9 OS=Mus musculus OX=10090 GN=Myh9 PE=1 SV=4                                                     | MOUSE | 38 |



|     |       |       |       |       |                                |                                                                                                      |       |    |
|-----|-------|-------|-------|-------|--------------------------------|------------------------------------------------------------------------------------------------------|-------|----|
| 131 | 54.72 | 69.6  | 48.72 | 46.37 | sp P17426 AP2A1_MOUSE          | AP-2 complex subunit alpha-1 OS=Mus musculus<br>OX=10090 GN=Ap2a1 PE=1 SV=1                          | MOUSE | 36 |
| 132 | 54.54 | 64.34 | 61.93 | 54.76 | tr Q3TU85 Q3TU85_MOUSE         | Hspa1b protein OS=Mus musculus OX=10090 GN=Hspa1b<br>PE=1 SV=1                                       | MOUSE | 45 |
| 133 | 54.4  | 87.29 | 51.81 | 45.65 | sp Q8VDN2 AT1A1_MOUSE          | Sodium/potassium-transporting ATPase subunit alpha-1<br>OS=Mus musculus OX=10090 GN=Atp1a1 PE=1 SV=1 | MOUSE | 66 |
| 134 | 54.35 | 54.39 | 63.08 | 55.20 | sp P26443 DHE3_MOUSE           | Glutamate dehydrogenase 1, mitochondrial OS=Mus<br>musculus OX=10090 GN=Glud1 PE=1 SV=1              | MOUSE | 30 |
| 135 | 53.79 | 72.34 | 57.06 | 50.89 | tr Q3V3U0 Q3V3U0_MOUSE         | Alpha-1,4 glucan phosphorylase OS=Mus musculus<br>OX=10090 GN=Pygb PE=2 SV=1                         | MOUSE | 37 |
| 136 | 53.67 | 53.7  | 36.66 | 29.69 | tr Q5DTI2 Q5DTI2_MOUSE         | P-type Ca(2+) transporter (Fragment) OS=Mus musculus<br>OX=10090 GN=Atp2a2 PE=2 SV=1                 | MOUSE | 25 |
| 137 | 53.57 | 60.6  | 52.56 | 48.46 | sp P12382 PFKAL_MOUSE          | ATP-dependent 6-phosphofructokinase, liver type OS=Mus<br>musculus OX=10090 GN=Pfk1 PE=1 SV=4        | MOUSE | 34 |
| 138 | 53.54 | 59.52 | 85.66 | 79.02 | tr Q3TMU8 Q3TMU8_MOUSE         | Dihydropyrimidinase-like 4 OS=Mus musculus OX=10090<br>GN=Dpysl4 PE=1 SV=1                           | MOUSE | 35 |
| 139 | 53.49 | 53.5  | 35.43 | 28.79 | tr A0A076FSX1 A0A076FSX1_MOUSE | KCC2b variant 2 OS=Mus musculus OX=10090 GN=Slc12a5<br>PE=2 SV=1                                     | MOUSE | 29 |
| 140 | 53.33 | 53.36 | 60.53 | 51.48 | sp D3Z7P3 GLSK_MOUSE           | Glutaminase kidney isoform, mitochondrial OS=Mus<br>musculus OX=10090 GN=Gls PE=1 SV=1               | MOUSE | 32 |
| 141 | 52.94 | 52.94 | 61.52 | 58.36 | tr F7DEU6 F7DEU6_MOUSE         | Inosine-5'-monophosphate dehydrogenase OS=Mus<br>musculus OX=10090 GN=Impdh1 PE=1 SV=2               | MOUSE | 29 |
| 142 | 52.87 | 52.89 | 64.81 | 61.08 | tr Q5SUC3 Q5SUC3_MOUSE         | Uncharacterized protein OS=Mus musculus OX=10090<br>GN=Canx PE=1 SV=1                                | MOUSE | 33 |
| 143 | 52.82 | 52.82 | 56.91 | 56.91 | tr G5E924 G5E924_MOUSE         | Heterogeneous nuclear ribonucleoprotein L (Fragment)<br>OS=Mus musculus OX=10090 GN=Hnrnpl PE=1 SV=1 | MOUSE | 36 |
| 144 | 52.75 | 52.74 | 83.14 | 80.39 | tr Q5SS40 Q5SS40_MOUSE         | 14_3_3 domain-containing protein OS=Mus musculus<br>OX=10090 GN=Ywhae PE=1 SV=1                      | MOUSE | 31 |
| 145 | 52.73 | 52.8  | 91.97 | 89.16 | sp P17751 TPIS_MOUSE           | Triosephosphate isomerase OS=Mus musculus OX=10090<br>GN=Tpi1 PE=1 SV=5                              | MOUSE | 43 |
| 146 | 52.26 | 52.35 | 47.31 | 39.67 | sp Q8BGQ7 SYAC_MOUSE           | Alanine--tRNA ligase, cytoplasmic OS=Mus musculus<br>OX=10090 GN=Aars1 PE=1 SV=1                     | MOUSE | 27 |
| 147 | 52.16 | 58.27 | 55.94 | 50.92 | tr Q3UZG3 Q3UZG3_MOUSE         | Uncharacterized protein OS=Mus musculus OX=10090<br>GN=Hnrnpa3 PE=2 SV=1                             | MOUSE | 39 |

|     |       |       |       |       |                                |                                                                                                    |       |    |
|-----|-------|-------|-------|-------|--------------------------------|----------------------------------------------------------------------------------------------------|-------|----|
| 148 | 52.09 | 71.25 | 91.47 | 85.25 | tr Q545V3 Q545V3_MOUSE         | 2-phospho-D-glycerate hydro-lyase OS=Mus musculus<br>OX=10090 GN=Eno2 PE=1 SV=1                    | MOUSE | 63 |
| 149 | 51.81 | 51.86 | 46.00 | 37.63 | sp P27546-2 MAP4_MOUSE         | Isoform 2 of Microtubule-associated protein 4 OS=Mus musculus<br>OX=10090 GN=Map4                  | MOUSE | 27 |
| 150 | 51.44 | 51.44 | 89.05 | 89.05 | tr Q3THL7 Q3THL7_MOUSE         | Voltage-dependent anion-selective channel protein 1<br>OS=Mus musculus OX=10090 GN=Vdac1 PE=2 SV=1 | MOUSE | 52 |
| 151 | 51.41 | 51.47 | 39.19 | 24.90 | tr Q1HL32 Q1HL32_MOUSE         | Structural maintenance of chromosomes protein OS=Mus musculus<br>OX=10090 GN=Smc3 PE=1 SV=1        | MOUSE | 26 |
| 152 | 51.38 | 51.87 | 41.89 | 33.30 | tr G3X9T8 G3X9T8_MOUSE         | Ceruloplasmin OS=Mus musculus OX=10090 GN=Cp PE=1<br>SV=1                                          | MOUSE | 26 |
| 153 | 51.31 | 51.33 | 59.60 | 55.45 | sp P27773 PDIA3_MOUSE          | Protein disulfide-isomerase A3 OS=Mus musculus<br>OX=10090 GN=Pdia3 PE=1 SV=2                      | MOUSE | 30 |
| 154 | 50.83 | 52.9  | 53.17 | 50.22 | sp P38647 GRP75_MOUSE          | Stress-70 protein, mitochondrial OS=Mus musculus<br>OX=10090 GN=Hspa9 PE=1 SV=3                    | MOUSE | 31 |
| 155 | 50.63 | 50.63 | 65.67 | 60.08 | sp P24549 AL1A1_MOUSE          | Retinal dehydrogenase 1 OS=Mus musculus OX=10090<br>GN=Aldh1a1 PE=1 SV=5                           | MOUSE | 28 |
| 156 | 50.4  | 50.41 | 64.01 | 59.66 | sp O88844 IDHC_MOUSE           | Isocitrate dehydrogenase [NADP] cytoplasmic OS=Mus musculus<br>OX=10090 GN=Idh1 PE=1 SV=2          | MOUSE | 29 |
| 157 | 50.03 | 50.04 | 76.62 | 66.67 | tr Q58E64 Q58E64_MOUSE         | Elongation factor 1-alpha OS=Mus musculus OX=10090<br>GN=Eef1a1 PE=1 SV=1                          | MOUSE | 39 |
| 158 | 49.99 | 50    | 79.81 | 78.55 | tr Q544Y3 Q544Y3_MOUSE         | CRAL-TRIO domain-containing protein OS=Mus musculus<br>OX=10090 GN=Rlbp1 PE=1 SV=1                 | MOUSE | 30 |
| 159 | 49.84 | 49.85 | 55.99 | 51.47 | tr Q3URP6 Q3URP6_MOUSE         | Protein disulfide-isomerase OS=Mus musculus OX=10090<br>GN=P4hb PE=2 SV=1                          | MOUSE | 28 |
| 160 | 49.79 | 49.86 | 43.50 | 36.67 | tr A0A1L1STE4 A0A1L1STE4_MOUSE | Interleukin enhancer-binding factor 3 OS=Mus musculus<br>OX=10090 GN=Ilf3 PE=1 SV=1                | MOUSE | 28 |
| 161 | 49.72 | 49.74 | 47.11 | 44.04 | tr Z4YKB8 Z4YKB8_MOUSE         | Heterochromatin protein 1-binding protein 3 OS=Mus musculus<br>OX=10090 GN=Hp1bp3 PE=1 SV=1        | MOUSE | 29 |
| 162 | 49.67 | 49.74 | 50.99 | 41.72 | tr Q545R0 Q545R0_MOUSE         | Catenin (Cadherin associated protein), alpha 1 OS=Mus musculus<br>OX=10090 GN=Ctnna1 PE=1 SV=1     | MOUSE | 27 |
| 163 | 49.67 | 49.69 | 55.19 | 50.19 | tr Q3UZT7 Q3UZT7_MOUSE         | Uncharacterized protein OS=Mus musculus OX=10090<br>GN=Ctnnb1 PE=2 SV=1                            | MOUSE | 25 |
| 164 | 49.38 | 49.48 | 36.95 | 31.44 | sp O54774 AP3D1_MOUSE          | AP-3 complex subunit delta-1 OS=Mus musculus OX=10090<br>GN=Ap3d1 PE=1 SV=1                        | MOUSE | 26 |

|     |       |       |       |       |                                |                                                                                                                     |       |    |
|-----|-------|-------|-------|-------|--------------------------------|---------------------------------------------------------------------------------------------------------------------|-------|----|
| 165 | 49.36 | 68.06 | 72.07 | 66.99 | tr Q3UPA3 Q3UPA3_MOUSE         | Rab GDP dissociation inhibitor (Fragment) OS=Mus musculus OX=10090 GN=Gdi2 PE=2 SV=1                                | MOUSE | 37 |
| 166 | 49.07 | 49.09 | 32.23 | 30.38 | sp Q9ERK4 XPO2_MOUSE           | Exportin-2 OS=Mus musculus OX=10090 GN=Cse1l PE=1 SV=1                                                              | MOUSE | 25 |
| 167 | 48.9  | 48.93 | 53.68 | 48.77 | sp P24527 LKHA4_MOUSE          | Leukotriene A-4 hydrolase OS=Mus musculus OX=10090 GN=Lta4h PE=1 SV=4                                               | MOUSE | 24 |
| 168 | 48.68 | 48.71 | 76.38 | 76.38 | tr Q3U7Z6 Q3U7Z6_MOUSE         | Phosphoglycerate mutase OS=Mus musculus OX=10090 GN=Pgam1 PE=1 SV=1                                                 | MOUSE | 43 |
| 169 | 48.56 | 48.63 | 55.82 | 53.14 | tr Q8BN32 Q8BN32_MOUSE         | Polyadenylate-binding protein OS=Mus musculus OX=10090 GN=Pabpc1 PE=2 SV=1                                          | MOUSE | 31 |
| 170 | 48.24 | 48.24 | 38.07 | 36.07 | sp Q61548 AP180_MOUSE          | Clathrin coat assembly protein AP180 OS=Mus musculus OX=10090 GN=Snap91 PE=1 SV=1                                   | MOUSE | 29 |
| 171 | 48.18 | 53.23 | 67.72 | 64.19 | tr Q564F4 Q564F4_MOUSE         | T-complex protein 1 subunit delta OS=Mus musculus OX=10090 GN=Cct4 PE=1 SV=1                                        | MOUSE | 35 |
| 172 | 48.04 | 48.06 | 59.08 | 55.09 | sp Q9Z2D6-2 MECP2_MOUSE        | Isoform B of Methyl-CpG-binding protein 2 OS=Mus musculus OX=10090 GN=Mecp2                                         | MOUSE | 24 |
| 173 | 48.02 | 48.14 | 61.58 | 52.39 | tr Q3TIJ7 Q3TIJ7_MOUSE         | T-complex protein 1 subunit eta OS=Mus musculus OX=10090 GN=Cct7 PE=1 SV=1                                          | MOUSE | 24 |
| 174 | 48.01 | 48.08 | 10.45 | 7.04  | tr A0A0R4J0I9 A0A0R4J0I9_MOUSE | Prolow-density lipoprotein receptor-related protein 1 OS=Mus musculus OX=10090 GN=Lrp1 PE=1 SV=1                    | MOUSE | 25 |
| 175 | 47.94 | 48.11 | 34.23 | 22.87 | sp Q9CU62 SMC1A_MOUSE          | Structural maintenance of chromosomes protein 1A OS=Mus musculus OX=10090 GN=Smc1a PE=1 SV=4                        | MOUSE | 25 |
| 176 | 47.78 | 50.18 | 13.98 | 8.43  | tr Q4JG03 Q4JG03_MOUSE         | HECT-type E3 ubiquitin transferase OS=Mus musculus OX=10090 GN=Huwe1 PE=2 SV=1                                      | MOUSE | 24 |
| 177 | 47.63 | 47.67 | 57.41 | 46.67 | sp Q9QYC0 ADDA_MOUSE           | Alpha-adducin OS=Mus musculus OX=10090 GN=Add1 PE=1 SV=2                                                            | MOUSE | 27 |
| 178 | 47.54 | 47.56 | 71.84 | 61.55 | tr Q790Y8 Q790Y8_MOUSE         | Glucose-6-phosphate 1-dehydrogenase OS=Mus musculus OX=10090 GN=G6pdx PE=1 SV=1                                     | MOUSE | 27 |
| 179 | 47.51 | 49.94 | 54.00 | 36.48 | tr Q6A0E3 Q6A0E3_MOUSE         | 116 kDa U5 small nuclear ribonucleoprotein component (Fragment) OS=Mus musculus OX=10090 GN=Eftud2 PE=2 SV=1        | MOUSE | 27 |
| 180 | 47.47 | 47.49 | 67.62 | 56.78 | sp Q8K2B3 SDHA_MOUSE           | Succinate dehydrogenase [ubiquinone] flavoprotein subunit, mitochondrial OS=Mus musculus OX=10090 GN=Sdha PE=1 SV=1 | MOUSE | 25 |

|     |       |       |       |       |                                |                                                                               |       |    |
|-----|-------|-------|-------|-------|--------------------------------|-------------------------------------------------------------------------------|-------|----|
| 181 | 47.34 | 47.34 | 87.62 | 83.66 | tr Q2TB46 Q2TB46_MOUSE         | Recoverin OS=Mus musculus OX=10090 GN=Rcvrn PE=2 SV=1                         | MOUSE | 26 |
| 182 | 47.02 | 47.06 | 41.52 | 32.57 | tr A0A571BEW4 A0A571BEW4_MOUSE | AP-3 complex subunit beta OS=Mus musculus OX=10090 GN=Ap3b2 PE=1 SV=1         | MOUSE | 25 |
| 183 | 46.95 | 46.97 | 57.91 | 42.88 | tr Q3U8W9 Q3U8W9_MOUSE         | Uncharacterized protein OS=Mus musculus OX=10090 GN=Hnrrnpr PE=2 SV=1         | MOUSE | 25 |
| 184 | 46.89 | 48.71 | 63.49 | 54.65 | sp P03995 GFAP_MOUSE           | Glial fibrillary acidic protein OS=Mus musculus OX=10090 GN=Gfap PE=1 SV=4    | MOUSE | 26 |
| 185 | 46.82 | 46.88 | 29.53 | 24.52 | sp Q8BYI9 TENR_MOUSE           | Tenascin-R OS=Mus musculus OX=10090 GN=Tnr PE=1 SV=2                          | MOUSE | 24 |
| 186 | 46.56 | 46.62 | 37.84 | 32.45 | sp P12960 CNTN1_MOUSE          | Contactin-1 OS=Mus musculus OX=10090 GN=Cntn1 PE=1 SV=1                       | MOUSE | 24 |
| 187 | 46.05 | 46.07 | 51.36 | 41.75 | sp Q921I1 TRFE_MOUSE           | Serotransferrin OS=Mus musculus OX=10090 GN=Tf PE=1 SV=1                      | MOUSE | 25 |
| 188 | 46.05 | 46.05 | 65.05 | 63.19 | tr Q3TF14 Q3TF14_MOUSE         | Adenosylhomocysteinase OS=Mus musculus OX=10090 GN=Ahcy PE=1 SV=1             | MOUSE | 24 |
| 189 | 45.88 | 47.96 | 48.72 | 45.11 | sp P48678 LMNA_MOUSE           | Prelamin-A/C OS=Mus musculus OX=10090 GN=Lmna PE=1 SV=2                       | MOUSE | 26 |
| 190 | 45.78 | 87.78 | 66.85 | 62.29 | tr Q71LX8 Q71LX8_MOUSE         | Heat shock protein 84b OS=Mus musculus OX=10090 GN=Hsp90ab1 PE=1 SV=1         | MOUSE | 52 |
| 191 | 45.76 | 60.05 | 60.23 | 54.70 | sp P21619 LMNB2_MOUSE          | Lamin-B2 OS=Mus musculus OX=10090 GN=Lmnb2 PE=1 SV=2                          | MOUSE | 31 |
| 192 | 45.74 | 45.77 | 52.84 | 42.80 | sp Q99JF8 PSIP1_MOUSE          | PC4 and SFRS1-interacting protein OS=Mus musculus OX=10090 GN=Psip1 PE=1 SV=1 | MOUSE | 32 |
| 193 | 45.66 | 60.08 | 31.57 | 17.46 | tr Q68FG2 Q68FG2_MOUSE         | Spectrin beta chain OS=Mus musculus OX=10090 GN=Sptbn2 PE=1 SV=1              | MOUSE | 31 |
| 194 | 45.64 | 57.96 | 54.26 | 40.38 | tr A0A5F8MPR1 A0A5F8MPR1_MOUSE | Band 4.1-like protein 3 OS=Mus musculus OX=10090 GN=Epb4113 PE=1 SV=1         | MOUSE | 31 |
| 195 | 45.59 | 45.61 | 31.88 | 23.17 | tr B2RSV4 B2RSV4_MOUSE         | Splicing factor 3b, subunit 3 OS=Mus musculus OX=10090 GN=Sf3b3 PE=2 SV=1     | MOUSE | 24 |
| 196 | 45.55 | 45.59 | 61.56 | 60.48 | sp Q9QZQ8 H2AY_MOUSE           | Core histone macro-H2A.1 OS=Mus musculus OX=10090 GN=Macroh2a1 PE=1 SV=3      | MOUSE | 27 |
| 197 | 45.54 | 45.55 | 51.31 | 49.40 | tr Q564E8 Q564E8_MOUSE         | 60S ribosomal protein L4 OS=Mus musculus OX=10090 GN=Rpl4 PE=1 SV=1           | MOUSE | 31 |

|     |       |       |       |       |                        |                                                                                                          |       |    |
|-----|-------|-------|-------|-------|------------------------|----------------------------------------------------------------------------------------------------------|-------|----|
| 198 | 45.52 | 45.55 | 81.31 | 77.85 | tr Q4FK49 Q4FK49_MOUSE | Inorganic diphosphatase OS=Mus musculus OX=10090 GN=Ppa1 PE=1 SV=1                                       | MOUSE | 24 |
| 199 | 45.44 | 45.45 | 42.91 | 39.88 | sp Q8CJG0 AGO2_MOUSE   | Protein argonaute-2 OS=Mus musculus OX=10090 GN=Ago2 PE=1 SV=3                                           | MOUSE | 22 |
| 200 | 45.43 | 45.48 | 67.98 | 57.30 | tr Q8C7C4 Q8C7C4_MOUSE | Uncharacterized protein (Fragment) OS=Mus musculus OX=10090 GN=Hmgb1 PE=2 SV=1                           | MOUSE | 35 |
| 201 | 45.27 | 45.31 | 55.98 | 50.36 | sp Q9WV34 MPP2_MOUSE   | MAGUK p55 subfamily member 2 OS=Mus musculus OX=10090 GN=Mpp2 PE=1 SV=1                                  | MOUSE | 23 |
| 202 | 45.11 | 45.14 | 37.89 | 25.74 | sp O35954 PITM1_MOUSE  | Membrane-associated phosphatidylinositol transfer protein 1 OS=Mus musculus OX=10090 GN=Fitpm1 PE=1 SV=1 | MOUSE | 22 |
| 203 | 45.09 | 45.16 | 38.31 | 29.46 | sp Q8K4Z5 SF3A1_MOUSE  | Splicing factor 3A subunit 1 OS=Mus musculus OX=10090 GN=Sf3a1 PE=1 SV=1                                 | MOUSE | 22 |
| 204 | 44.91 | 45.05 | 50.57 | 37.02 | tr Q3UJB0 Q3UJB0_MOUSE | Splicing factor 3b, subunit 2 OS=Mus musculus OX=10090 GN=Sf3b2 PE=1 SV=1                                | MOUSE | 22 |
| 205 | 44.63 | 44.7  | 58.87 | 46.28 | tr Q5EBP9 Q5EBP9_MOUSE | Tripartite motif-containing 28 OS=Mus musculus OX=10090 GN=Trim28 PE=2 SV=1                              | MOUSE | 26 |
| 206 | 44.6  | 49.11 | 58.01 | 47.89 | tr Q3TQX5 Q3TQX5_MOUSE | RNA helicase OS=Mus musculus OX=10090 GN=Ddx3x PE=1 SV=1                                                 | MOUSE | 26 |
| 207 | 44.58 | 44.69 | 21.13 | 13.75 | tr Q7M739 Q7M739_MOUSE | Nucleoprotein TPR OS=Mus musculus OX=10090 GN=Tpr PE=1 SV=1                                              | MOUSE | 24 |
| 208 | 44.39 | 44.42 | 58.71 | 50.56 | tr E9PUD2 E9PUD2_MOUSE | Dynamin-1-like protein OS=Mus musculus OX=10090 GN=Dnm1l PE=1 SV=1                                       | MOUSE | 24 |
| 209 | 44.32 | 44.36 | 32.82 | 22.74 | sp Q810U3 NFASC_MOUSE  | Neurofascin OS=Mus musculus OX=10090 GN=Nfasc PE=1 SV=1                                                  | MOUSE | 24 |
| 210 | 44.26 | 46.26 | 41.93 | 28.14 | tr F8WHL2 F8WHL2_MOUSE | Coatomer subunit alpha OS=Mus musculus OX=10090 GN=Copa PE=1 SV=1                                        | MOUSE | 25 |
| 211 | 44.23 | 44.39 | 59.04 | 40.07 | tr A2A7S7 A2A7S7_MOUSE | Tyrosine--tRNA ligase OS=Mus musculus OX=10090 GN=Yars PE=1 SV=1                                         | MOUSE | 21 |
| 212 | 44.16 | 44.18 | 40.45 | 33.42 | tr Q3TRJ1 Q3TRJ1_MOUSE | Vacuolar protein sorting-associated protein 35 OS=Mus musculus OX=10090 GN=Vps35 PE=1 SV=1               | MOUSE | 22 |
| 213 | 44.12 | 84.09 | 57.62 | 55.21 | tr Q5SWR1 Q5SWR1_MOUSE | AP complex subunit beta OS=Mus musculus OX=10090 GN=Ap2b1 PE=2 SV=1                                      | MOUSE | 50 |

|     |       |       |       |       |                                |                                                                                                  |       |    |
|-----|-------|-------|-------|-------|--------------------------------|--------------------------------------------------------------------------------------------------|-------|----|
| 214 | 44.01 | 44.42 | 39.19 | 27.03 | tr Q3UHU8 Q3UHU8_MOUSE         | General transcription factor II-I OS=Mus musculus<br>OX=10090 GN=Gtf2i PE=1 SV=1                 | MOUSE | 22 |
| 215 | 43.99 | 44.05 | 42.16 | 33.64 | sp Q61768 KINH_MOUSE           | Kinesin-1 heavy chain OS=Mus musculus OX=10090<br>GN=Kif5b PE=1 SV=3                             | MOUSE | 23 |
| 216 | 43.99 | 44.04 | 23.13 | 15.33 | tr A0A668KLC6 A0A668KLC6_MOUSE | Microtubule-associated protein OS=Mus musculus<br>OX=10090 GN=Map2 PE=1 SV=1                     | MOUSE | 24 |
| 217 | 43.82 | 43.85 | 64.82 | 57.96 | sp Q8BFR5 EFTU_MOUSE           | Elongation factor Tu, mitochondrial OS=Mus musculus<br>OX=10090 GN=Tufm PE=1 SV=1                | MOUSE | 23 |
| 218 | 43.81 | 43.85 | 76.96 | 61.78 | sp Q9Z1G3 VATC1_MOUSE          | V-type proton ATPase subunit C 1 OS=Mus musculus<br>OX=10090 GN=Atp6v1c1 PE=1 SV=4               | MOUSE | 21 |
| 219 | 43.57 | 43.6  | 64.69 | 57.76 | tr Q3TJY2 Q3TJY2_MOUSE         | WD repeat domain 1 OS=Mus musculus OX=10090<br>GN=Wdr1 PE=1 SV=1                                 | MOUSE | 26 |
| 220 | 43.55 | 43.65 | 53.14 | 43.96 | sp Q8CAA7 PGM2L_MOUSE          | Glucose 1,6-bisphosphate synthase OS=Mus musculus<br>OX=10090 GN=Pgm2l1 PE=1 SV=1                | MOUSE | 23 |
| 221 | 43.44 | 43.5  | 64.67 | 61.88 | sp P97807-2 FUMH_MOUSE         | Isoform Cytoplasmic of Fumarate hydratase, mitochondrial<br>OS=Mus musculus OX=10090 GN=Fh       | MOUSE | 23 |
| 222 | 43.41 | 43.57 | 88.35 | 72.82 | tr B2RTM0 B2RTM0_MOUSE         | Histone H4 OS=Mus musculus OX=10090 GN=Hist2h4 PE=1<br>SV=1                                      | MOUSE | 74 |
| 223 | 43.22 | 43.24 | 60.91 | 48.87 | sp O88935 SYN1_MOUSE           | Synapsin-1 OS=Mus musculus OX=10090 GN=Syn1 PE=1<br>SV=2                                         | MOUSE | 35 |
| 224 | 43.2  | 43.29 | 39.43 | 33.10 | sp Q8BIJ6 SYIM_MOUSE           | Isoleucine--tRNA ligase, mitochondrial OS=Mus musculus<br>OX=10090 GN=lars2 PE=1 SV=1            | MOUSE | 21 |
| 225 | 43.04 | 43.18 | 66.38 | 53.06 | sp P30416 FKBP4_MOUSE          | Peptidyl-prolyl cis-trans isomerase FKBP4 OS=Mus<br>musculus OX=10090 GN=Fkbp4 PE=1 SV=5         | MOUSE | 26 |
| 226 | 42.9  | 43.04 | 40.39 | 27.14 | sp Q9EPU0 RENT1_MOUSE          | Regulator of nonsense transcripts 1 OS=Mus musculus<br>OX=10090 GN=Upf1 PE=1 SV=2                | MOUSE | 21 |
| 227 | 42.83 | 42.84 | 42.51 | 39.76 | tr Q3U4W8 Q3U4W8_MOUSE         | Ubiquitin carboxyl-terminal hydrolase OS=Mus musculus<br>OX=10090 GN=Usp5 PE=1 SV=1              | MOUSE | 24 |
| 228 | 42.78 | 42.86 | 61.56 | 60.83 | sp Q91VC3 IF4A3_MOUSE          | Eukaryotic initiation factor 4A-III OS=Mus musculus<br>OX=10090 GN=Eif4a3 PE=1 SV=3              | MOUSE | 25 |
| 229 | 42.78 | 42.84 | 53.21 | 44.69 | sp Q8BMS1 ECHA_MOUSE           | Trifunctional enzyme subunit alpha, mitochondrial<br>OS=Mus musculus OX=10090 GN=Hadha PE=1 SV=1 | MOUSE | 23 |
| 230 | 42.59 | 44.79 | 50.57 | 43.96 | sp Q80SW1 SAHH2_MOUSE          | S-adenosylhomocysteine hydrolase-like protein 1 OS=Mus<br>musculus OX=10090 GN=Ahcyl1 PE=1 SV=1  | MOUSE | 27 |

|     |       |       |       |       |                                |                                                                                                                 |       |    |
|-----|-------|-------|-------|-------|--------------------------------|-----------------------------------------------------------------------------------------------------------------|-------|----|
| 231 | 42.48 | 42.54 | 41.97 | 41.69 | sp Q60668 HNRPD_MOUSE          | Heterogeneous nuclear ribonucleoprotein D0 OS=Mus musculus OX=10090 GN=Hnrnpd PE=1 SV=2                         | MOUSE | 28 |
| 232 | 42.25 | 43.12 | 65.31 | 58.73 | tr Q543Y7 Q543Y7_MOUSE         | Protein kinase C and casein kinase substrate in neurons protein 1 OS=Mus musculus OX=10090 GN=Pacsin1 PE=1 SV=1 | MOUSE | 23 |
| 233 | 42.22 | 42.28 | 61.68 | 48.90 | tr Q3TMC5 Q3TMC5_MOUSE         | Aspartate--tRNA ligase, cytoplasmic OS=Mus musculus OX=10090 GN=Dars PE=2 SV=1                                  | MOUSE | 22 |
| 234 | 42.18 | 42.27 | 53.89 | 52.69 | sp P14152 MDHC_MOUSE           | Malate dehydrogenase, cytoplasmic OS=Mus musculus OX=10090 GN=Mdh1 PE=1 SV=3                                    | MOUSE | 30 |
| 235 | 42.15 | 42.22 | 56.14 | 53.52 | sp Q9CZW5 TOM70_MOUSE          | Mitochondrial import receptor subunit TOM70 OS=Mus musculus OX=10090 GN=Tomm70 PE=1 SV=2                        | MOUSE | 29 |
| 236 | 42.08 | 63.96 | 51.23 | 47.70 | tr Q3U741 Q3U741_MOUSE         | RNA helicase OS=Mus musculus OX=10090 GN=Ddx17 PE=1 SV=1                                                        | MOUSE | 33 |
| 237 | 41.8  | 41.82 | 37.26 | 37.26 | tr Q5SZA3 Q5SZA3_MOUSE         | Histone cluster 1, H1c OS=Mus musculus OX=10090 GN=H1f2 PE=1 SV=1                                               | MOUSE | 40 |
| 238 | 41.75 | 42.22 | 32.76 | 20.04 | sp Q6PB66 LPPRC_MOUSE          | Leucine-rich PPR motif-containing protein, mitochondrial OS=Mus musculus OX=10090 GN=Lrpprc PE=1 SV=2           | MOUSE | 21 |
| 239 | 41.74 | 41.75 | 76.54 | 76.54 | sp P00920 CAH2_MOUSE           | Carbonic anhydrase 2 OS=Mus musculus OX=10090 GN=Ca2 PE=1 SV=4                                                  | MOUSE | 57 |
| 240 | 41.51 | 41.67 | 47.99 | 36.55 | tr Q3UI56 Q3UI56_MOUSE         | Annexin OS=Mus musculus OX=10090 GN=Anxa6 PE=2 SV=1                                                             | MOUSE | 20 |
| 241 | 41.44 | 41.48 | 64.72 | 59.11 | sp Q9Z1N5 DX39B_MOUSE          | Spliceosome RNA helicase Ddx39b OS=Mus musculus OX=10090 GN=Ddx39b PE=1 SV=1                                    | MOUSE | 35 |
| 242 | 41.35 | 41.58 | 57.99 | 52.51 | sp Q9Z1F9 SAE2_MOUSE           | SUMO-activating enzyme subunit 2 OS=Mus musculus OX=10090 GN=Uba2 PE=1 SV=1                                     | MOUSE | 25 |
| 243 | 41.15 | 41.28 | 56.98 | 54.92 | tr E9Q1G8 E9Q1G8_MOUSE         | Septin OS=Mus musculus OX=10090 GN=Septin7 PE=1 SV=2                                                            | MOUSE | 24 |
| 244 | 41.1  | 41.13 | 49.74 | 45.29 | tr A0A1B0GR11 A0A1B0GR11_MOUSE | Transaldolase OS=Mus musculus OX=10090 GN=Taldo1 PE=1 SV=1                                                      | MOUSE | 23 |
| 245 | 41.05 | 41.11 | 46.74 | 34.11 | sp Q9JLV5 CUL3_MOUSE           | Cullin-3 OS=Mus musculus OX=10090 GN=Cul3 PE=1 SV=1                                                             | MOUSE | 20 |
| 246 | 40.98 | 41.04 | 68.64 | 59.96 | sp P17563 SBP1_MOUSE           | Methanethiol oxidase OS=Mus musculus OX=10090 GN=Selenbp1 PE=1 SV=2                                             | MOUSE | 24 |

|     |       |       |       |       |                                |                                                                                                            |       |    |
|-----|-------|-------|-------|-------|--------------------------------|------------------------------------------------------------------------------------------------------------|-------|----|
| 247 | 40.76 | 40.78 | 51.57 | 44.48 | sp E9Q912 GDS1_MOUSE           | Rap1 GTPase-GDP dissociation stimulator 1 OS=Mus musculus OX=10090 GN=Rap1gds1 PE=2 SV=1                   | MOUSE | 23 |
| 248 | 40.7  | 40.72 | 52.35 | 47.27 | tr Q52KG9 Q52KG9_MOUSE         | Chaperonin containing Tcp1, subunit 6a (Zeta) OS=Mus musculus OX=10090 GN=Cct6a PE=2 SV=1                  | MOUSE | 22 |
| 249 | 40.69 | 40.7  | 65.71 | 61.32 | tr D3YUM1 D3YUM1_MOUSE         | NADH dehydrogenase [ubiquinone] flavoprotein 1, mitochondrial OS=Mus musculus OX=10090 GN=Ndufv1 PE=1 SV=1 | MOUSE | 22 |
| 250 | 40.5  | 42.36 | 38.86 | 31.51 | sp Q8BFY9 TNPO1_MOUSE          | Transportin-1 OS=Mus musculus OX=10090 GN=Tnpol PE=1 SV=2                                                  | MOUSE | 22 |
| 251 | 40.48 | 40.56 | 36.78 | 31.61 | tr Q3TXV1 Q3TXV1_MOUSE         | 26S proteasome non-ATPase regulatory subunit 2 OS=Mus musculus OX=10090 GN=Psm2 PE=2 SV=1                  | MOUSE | 22 |
| 252 | 40.42 | 40.45 | 68.63 | 65.33 | tr Q3TQP7 Q3TQP7_MOUSE         | Uncharacterized protein OS=Mus musculus OX=10090 GN=Acat1 PE=2 SV=1                                        | MOUSE | 21 |
| 253 | 40.25 | 41.94 | 70.22 | 63.01 | sp P48036 ANXA5_MOUSE          | Annexin A5 OS=Mus musculus OX=10090 GN=Anxa5 PE=1 SV=1                                                     | MOUSE | 21 |
| 254 | 40.24 | 40.27 | 48.79 | 42.16 | sp Q9DB77 QCR2_MOUSE           | Cytochrome b-c1 complex subunit 2, mitochondrial OS=Mus musculus OX=10090 GN=Uqcrc2 PE=1 SV=1              | MOUSE | 22 |
| 255 | 39.92 | 46.83 | 46.03 | 39.87 | sp P47857 PFKAM_MOUSE          | ATP-dependent 6-phosphofructokinase, muscle type OS=Mus musculus OX=10090 GN=Pfkml PE=1 SV=3               | MOUSE | 25 |
| 256 | 39.89 | 40.02 | 37.44 | 29.91 | tr Q7TSZ6 Q7TSZ6_MOUSE         | Karyopherin (Importin) beta 1 OS=Mus musculus OX=10090 GN=Kpnb1 PE=2 SV=1                                  | MOUSE | 21 |
| 257 | 39.89 | 39.9  | 56.44 | 47.33 | sp Q99LF4 RTCB_MOUSE           | RNA-splicing ligase RtcB homolog OS=Mus musculus OX=10090 GN=RtcB PE=1 SV=1                                | MOUSE | 22 |
| 258 | 39.88 | 40.84 | 65.38 | 58.06 | tr A0A0A6YX18 A0A0A6YX18_MOUSE | V-type proton ATPase subunit H OS=Mus musculus OX=10090 GN=Atp6v1h PE=1 SV=1                               | MOUSE | 21 |
| 259 | 39.84 | 39.91 | 56.84 | 55.16 | sp Q9D1A2 CNDP2_MOUSE          | Cytosolic non-specific dipeptidase OS=Mus musculus OX=10090 GN=Cndp2 PE=1 SV=1                             | MOUSE | 22 |
| 260 | 39.82 | 41.79 | 31.83 | 21.06 | tr Q790I0 Q790I0_MOUSE         | Valyl-tRNA synthetase OS=Mus musculus OX=10090 GN=Vars PE=1 SV=1                                           | MOUSE | 20 |
| 261 | 39.8  | 39.82 | 62.08 | 60.00 | sp Q9CZ13 QCR1_MOUSE           | Cytochrome b-c1 complex subunit 1, mitochondrial OS=Mus musculus OX=10090 GN=Uqcrc1 PE=1 SV=2              | MOUSE | 28 |
| 262 | 39.6  | 51.86 | 56.03 | 51.21 | tr Q5EBP8 Q5EBP8_MOUSE         | Helix-destabilizing protein OS=Mus musculus OX=10090 GN=Hnnpa1 PE=1 SV=1                                   | MOUSE | 30 |



|     |       |       |       |       |                                |                                                                                                                                                     |       |    |
|-----|-------|-------|-------|-------|--------------------------------|-----------------------------------------------------------------------------------------------------------------------------------------------------|-------|----|
| 263 | 39.6  | 43.68 | 77.14 | 65.31 | sp P63101 1433Z_MOUSE          | 14-3-3 protein zeta/delta OS=Mus musculus OX=10090 GN=Ywhaz PE=1 SV=1                                                                               | MOUSE | 27 |
| 264 | 39.53 | 39.56 | 49.17 | 42.98 | tr Q3UUR0 Q3UUR0_MOUSE         | Uncharacterized protein OS=Mus musculus OX=10090 GN=Rgs9 PE=2 SV=1                                                                                  | MOUSE | 22 |
| 265 | 39.38 | 39.45 | 47.83 | 41.39 | sp Q8BMK4 CKAP4_MOUSE          | Cytoskeleton-associated protein 4 OS=Mus musculus OX=10090 GN=Ckap4 PE=1 SV=2                                                                       | MOUSE | 21 |
| 266 | 39.38 | 39.37 | 73.83 | 73.15 | sp P28663 SNAB_MOUSE           | Beta-soluble NSF attachment protein OS=Mus musculus OX=10090 GN=Napb PE=1 SV=2                                                                      | MOUSE | 22 |
| 267 | 39.36 | 43.53 | 64.27 | 53.70 | tr Q4FK11 Q4FK11_MOUSE         | Nono protein OS=Mus musculus OX=10090 GN=Nono PE=2 SV=1                                                                                             | MOUSE | 24 |
| 268 | 39.33 | 40.08 | 43.90 | 37.21 | tr Q05C56 Q05C56_MOUSE         | Add3 protein (Fragment) OS=Mus musculus OX=10090 GN=Add3 PE=2 SV=1                                                                                  | MOUSE | 22 |
| 269 | 39.32 | 39.54 | 29.69 | 23.58 | tr Q3TCQ3 Q3TCQ3_MOUSE         | Pyruvate carboxylase OS=Mus musculus OX=10090 GN=Pcx PE=2 SV=1                                                                                      | MOUSE | 20 |
| 270 | 38.99 | 39.02 | 71.15 | 59.13 | tr B2MWM9 B2MWM9_MOUSE         | Calreticulin OS=Mus musculus OX=10090 GN=Calr PE=1 SV=1                                                                                             | MOUSE | 21 |
| 271 | 38.92 | 38.98 | 43.55 | 32.84 | sp Q3TXS7 PSMD1_MOUSE          | 26S proteasome non-ATPase regulatory subunit 1 OS=Mus musculus OX=10090 GN=Psm1 PE=1 SV=1                                                           | MOUSE | 22 |
| 272 | 38.73 | 38.86 | 52.36 | 36.65 | tr A0A338P6I6 A0A338P6I6_MOUSE | Disks large homolog 4 OS=Mus musculus OX=10090 GN=Dlg4 PE=1 SV=1                                                                                    | MOUSE | 21 |
| 273 | 38.71 | 38.85 | 40.63 | 26.67 | sp P58281 OPA1_MOUSE           | Dynamin-like 120 kDa protein, mitochondrial OS=Mus musculus OX=10090 GN=Opa1 PE=1 SV=1                                                              | MOUSE | 19 |
| 274 | 38.44 | 38.52 | 62.59 | 54.44 | sp Q80TB8 VAT1L_MOUSE          | Synaptic vesicle membrane protein VAT-1 homolog-like OS=Mus musculus OX=10090 GN=Vat1l PE=1 SV=2                                                    | MOUSE | 21 |
| 275 | 38.37 | 38.38 | 50.78 | 39.72 | sp Q8BMF4 ODP2_MOUSE           | Dihydrolipoyllysine-residue acetyltransferase component of pyruvate dehydrogenase complex, mitochondrial OS=Mus musculus OX=10090 GN=Dlat PE=1 SV=2 | MOUSE | 20 |
| 276 | 38.24 | 38.55 | 35.67 | 24.33 | tr G3X914 G3X914_MOUSE         | Cullin-5 OS=Mus musculus OX=10090 GN=Cul5 PE=1 SV=1                                                                                                 | MOUSE | 20 |
| 277 | 38.24 | 38.29 | 29.65 | 20.97 | tr Q3UID0 Q3UID0_MOUSE         | SWI/SNF complex subunit SMARCC2 OS=Mus musculus OX=10090 GN=Smrcc2 PE=1 SV=1                                                                        | MOUSE | 21 |
| 278 | 38.2  | 38.28 | 51.94 | 46.77 | sp Q9CZU6 CISY_MOUSE           | Citrate synthase, mitochondrial OS=Mus musculus OX=10090 GN=Cs PE=1 SV=1                                                                            | MOUSE | 24 |

|     |       |       |       |       |                         |                                                                                               |       |    |
|-----|-------|-------|-------|-------|-------------------------|-----------------------------------------------------------------------------------------------|-------|----|
| 279 | 38.14 | 38.17 | 79.40 | 75.88 | sp P35700 PRDX1_MOUSE   | Peroxiredoxin-1 OS=Mus musculus OX=10090 GN=Prdx1 PE=1 SV=1                                   | MOUSE | 26 |
| 280 | 38.1  | 38.12 | 58.97 | 56.67 | tr Q3UFJ3 Q3UFJ3_MOUSE  | Pyruvate dehydrogenase E1 component subunit alpha OS=Mus musculus OX=10090 GN=Pdha1 PE=1 SV=1 | MOUSE | 20 |
| 281 | 37.96 | 38    | 81.07 | 74.27 | sp P60879 SNP25_MOUSE   | Synaptosomal-associated protein 25 OS=Mus musculus OX=10090 GN=Snap25 PE=1 SV=1               | MOUSE | 24 |
| 282 | 37.74 | 37.8  | 38.50 | 32.97 | sp Q8VDP4 CCAR2_MOUSE   | Cell cycle and apoptosis regulator protein 2 OS=Mus musculus OX=10090 GN=Ccar2 PE=1 SV=2      | MOUSE | 22 |
| 283 | 37.65 | 41.69 | 51.97 | 51.23 | tr Q5F2A7 Q5F2A7_MOUSE  | RNA helicase OS=Mus musculus OX=10090 GN=Eif4a1 PE=1 SV=1                                     | MOUSE | 25 |
| 284 | 37.62 | 37.68 | 23.59 | 15.16 | tr A2AGR0 A2AGR0_MOUSE  | MAP kinase-activating death domain protein OS=Mus musculus OX=10090 GN=Madd PE=1 SV=1         | MOUSE | 19 |
| 285 | 37.6  | 37.7  | 33.57 | 22.07 | tr Q08EB6 Q08EB6_MOUSE  | CLIP-associating protein 2 OS=Mus musculus OX=10090 GN=Clasp2 PE=1 SV=1                       | MOUSE | 20 |
| 286 | 37.36 | 37.37 | 43.60 | 39.73 | tr Q4VA93 Q4VA93_MOUSE  | Protein kinase C OS=Mus musculus OX=10090 GN=Prkca PE=1 SV=1                                  | MOUSE | 22 |
| 287 | 37.28 | 37.33 | 57.38 | 57.38 | sp Q3URD3-4 SLMAP_MOUSE | Isoform 4 of Sarcolemmal membrane-associated protein OS=Mus musculus OX=10090 GN=Slmap        | MOUSE | 25 |
| 288 | 37.22 | 37.27 | 89.68 | 83.33 | sp Q8CGP2 H2B1P_MOUSE   | Histone H2B type 1-P OS=Mus musculus OX=10090 GN=Hist1h2bp PE=1 SV=3                          | MOUSE | 63 |
| 289 | 37.2  | 41.41 | 68.08 | 62.71 | tr Q543S2 Q543S2_MOUSE  | Uncharacterized protein OS=Mus musculus OX=10090 GN=Gnao1 PE=2 SV=1                           | MOUSE | 24 |
| 290 | 37.18 | 37.22 | 56.35 | 45.01 | sp Q8C854 MYEF2_MOUSE   | Myelin expression factor 2 OS=Mus musculus OX=10090 GN=Myef2 PE=1 SV=1                        | MOUSE | 19 |
| 291 | 37.06 | 37.17 | 38.16 | 28.05 | sp Q3UHHJ AAK1_MOUSE    | AP2-associated protein kinase 1 OS=Mus musculus OX=10090 GN=Aak1 PE=1 SV=2                    | MOUSE | 22 |
| 292 | 37.06 | 37.08 | 57.42 | 51.54 | tr Q3U995 Q3U995_MOUSE  | Phosphate carrier protein, mitochondrial OS=Mus musculus OX=10090 GN=Slc25a3 PE=2 SV=1        | MOUSE | 21 |
| 293 | 36.81 | 36.86 | 46.88 | 44.48 | tr Q3U590 Q3U590_MOUSE  | SMP_C2CD2L domain-containing protein OS=Mus musculus OX=10090 GN=C2cd2l PE=2 SV=1             | MOUSE | 23 |
| 294 | 36.79 | 36.82 | 81.40 | 73.05 | sp Q9QYG0 NDRG2_MOUSE   | Protein NDRG2 OS=Mus musculus OX=10090 GN=Ndr2 PE=1 SV=1                                      | MOUSE | 21 |
| 295 | 36.64 | 36.65 | 58.30 | 51.91 | tr Q3UCC6 Q3UCC6_MOUSE  | Succinate-CoA ligase subunit beta (Fragment) OS=Mus musculus OX=10090 GN=Slc25a3 PE=2 SV=1    | MOUSE | 23 |

|     |       |       |       |       |                        |                                                                                                         |       |    |
|-----|-------|-------|-------|-------|------------------------|---------------------------------------------------------------------------------------------------------|-------|----|
| 296 | 36.54 | 36.6  | 50.52 | 41.21 | sp Q9D6Z1 NOP56_MOUSE  | Nucleolar protein 56 OS=Mus musculus OX=10090 GN=Nop56 PE=1 SV=2                                        | MOUSE | 20 |
| 297 | 36.51 | 36.73 | 47.64 | 39.03 | sp Q9CZW4 ACSL3_MOUSE  | Long-chain-fatty-acid--CoA ligase 3 OS=Mus musculus OX=10090 GN=Acs13 PE=1 SV=2                         | MOUSE | 19 |
| 298 | 36.45 | 36.49 | 73.25 | 68.31 | tr Q5YLW3 Q5YLW3_MOUSE | 40S ribosomal protein S3 OS=Mus musculus OX=10090 GN=Rps3 PE=1 SV=1                                     | MOUSE | 19 |
| 299 | 36.44 | 40.29 | 42.06 | 42.06 | tr Q3TUE1 Q3TUE1_MOUSE | Far upstream element-binding protein 1 OS=Mus musculus OX=10090 GN=Fubp1 PE=1 SV=1                      | MOUSE | 21 |
| 300 | 36.36 | 39.43 | 62.57 | 53.59 | sp P16125 LDHB_MOUSE   | L-lactate dehydrogenase B chain OS=Mus musculus OX=10090 GN=Ldhb PE=1 SV=2                              | MOUSE | 22 |
| 301 | 36.3  | 37.16 | 62.44 | 54.73 | tr Q8K1M3 Q8K1M3_MOUSE | Protein kinase, cAMP dependent regulatory, type II alpha OS=Mus musculus OX=10090 GN=Prkar2a PE=1 SV=1  | MOUSE | 20 |
| 302 | 36.29 | 36.32 | 85.37 | 85.37 | tr Q5SVY2 Q5SVY2_MOUSE | Peptidyl-prolyl cis-trans isomerase OS=Mus musculus OX=10090 GN=Ppia PE=1 SV=1                          | MOUSE | 38 |
| 303 | 36.24 | 36.27 | 53.82 | 52.08 | sp P61264 STX1B_MOUSE  | Syntaxin-1B OS=Mus musculus OX=10090 GN=Stx1b PE=1 SV=1                                                 | MOUSE | 18 |
| 304 | 36.12 | 36.21 | 31.81 | 21.60 | sp Q8BKC5 IPO5_MOUSE   | Importin-5 OS=Mus musculus OX=10090 GN=Ipo5 PE=1 SV=3                                                   | MOUSE | 20 |
| 305 | 36.12 | 36.16 | 57.52 | 46.68 | sp P06801 MAOX_MOUSE   | NADP-dependent malic enzyme OS=Mus musculus OX=10090 GN=Me1 PE=1 SV=2                                   | MOUSE | 19 |
| 306 | 36.04 | 37.96 | 45.78 | 37.05 | tr D3Z041 D3Z041_MOUSE | Long-chain-fatty-acid--CoA ligase 1 OS=Mus musculus OX=10090 GN=Acs11 PE=1 SV=1                         | MOUSE | 22 |
| 307 | 35.93 | 36    | 54.02 | 50.80 | tr Q5FWI9 Q5FWI9_MOUSE | AP-2 complex subunit mu OS=Mus musculus OX=10090 GN=Ap2m1 PE=1 SV=1                                     | MOUSE | 18 |
| 308 | 35.78 | 35.82 | 76.17 | 62.09 | tr B2RXY7 B2RXY7_MOUSE | Carbonyl reductase 1 OS=Mus musculus OX=10090 GN=Cbr1 PE=1 SV=1                                         | MOUSE | 18 |
| 309 | 35.63 | 35.7  | 37.37 | 29.48 | tr Q8VDC3 Q8VDC3_MOUSE | Citrate hydro-lyase OS=Mus musculus OX=10090 GN=aco1 PE=3 SV=1                                          | MOUSE | 20 |
| 310 | 35.53 | 35.55 | 95.24 | 95.24 | tr A8DUK4 A8DUK4_MOUSE | Beta-globin OS=Mus musculus OX=10090 GN=Hbb-bs PE=1 SV=1                                                | MOUSE | 24 |
| 311 | 35.48 | 35.52 | 60.11 | 52.46 | sp Q9D6R2 IDH3A_MOUSE  | Isocitrate dehydrogenase [NAD] subunit alpha, mitochondrial OS=Mus musculus OX=10090 GN=Idh3a PE=1 SV=1 | MOUSE | 21 |

|     |       |       |       |       |                                |                                                                                                  |       |    |
|-----|-------|-------|-------|-------|--------------------------------|--------------------------------------------------------------------------------------------------|-------|----|
| 312 | 35.45 | 35.47 | 94.65 | 93.05 | tr Q5EBQ2 Q5EBQ2_MOUSE         | Phosphatidylethanolamine binding protein 1 OS=Mus musculus OX=10090 GN=Pebp1 PE=1 SV=1           | MOUSE | 29 |
| 313 | 35.43 | 35.52 | 65.47 | 42.11 | tr Q8BVQ9 Q8BVQ9_MOUSE         | 26S proteasome AAA-ATPase subunit RPT1 OS=Mus musculus OX=10090 GN=Psmc2 PE=1 SV=1               | MOUSE | 17 |
| 314 | 35.36 | 35.44 | 60.06 | 47.49 | sp P63085 MK01_MOUSE           | Mitogen-activated protein kinase 1 OS=Mus musculus OX=10090 GN=Mapk1 PE=1 SV=3                   | MOUSE | 19 |
| 315 | 35.36 | 35.38 | 81.36 | 78.18 | tr Q0PD63 Q0PD63_MOUSE         | Ras-related protein Rab-3 OS=Mus musculus OX=10090 GN=Rab3a PE=1 SV=1                            | MOUSE | 22 |
| 316 | 35.19 | 35.3  | 33.54 | 21.76 | tr F8VPX1 F8VPX1_MOUSE         | Ubiquitin carboxyl-terminal hydrolase 7 OS=Mus musculus OX=10090 GN=Usp7 PE=1 SV=1               | MOUSE | 17 |
| 317 | 35.17 | 35.36 | 18.21 | 11.13 | sp Q5SWU9 ACACA_MOUSE          | Acetyl-CoA carboxylase 1 OS=Mus musculus OX=10090 GN=Acaca PE=1 SV=1                             | MOUSE | 17 |
| 318 | 35.17 | 35.21 | 51.08 | 45.19 | sp O08749 DLDH_MOUSE           | Dihydrolipoyl dehydrogenase, mitochondrial OS=Mus musculus OX=10090 GN=Dld PE=1 SV=2             | MOUSE | 20 |
| 319 | 35.16 | 35.29 | 24.18 | 16.67 | sp P23116 EIF3A_MOUSE          | Eukaryotic translation initiation factor 3 subunit A OS=Mus musculus OX=10090 GN=Eif3a PE=1 SV=5 | MOUSE | 20 |
| 320 | 35.16 | 35.2  | 58.11 | 53.24 | tr Q543K5 Q543K5_MOUSE         | Phosphoserine aminotransferase OS=Mus musculus OX=10090 GN=Psat1 PE=1 SV=1                       | MOUSE | 18 |
| 321 | 35.15 | 35.19 | 29.27 | 26.46 | tr A0A668KM31 A0A668KM31_MOUSE | Amphiphysin OS=Mus musculus OX=10090 GN=Amph PE=1 SV=1                                           | MOUSE | 19 |
| 322 | 35.03 | 35.07 | 85.71 | 85.71 | tr Q6GT24 Q6GT24_MOUSE         | Peroxiredoxin-6 OS=Mus musculus OX=10090 GN=Prdx6 PE=1 SV=1                                      | MOUSE | 24 |
| 323 | 34.94 | 35.02 | 65.93 | 64.60 | sp P50518 VATE1_MOUSE          | V-type proton ATPase subunit E 1 OS=Mus musculus OX=10090 GN=Atp6v1e1 PE=1 SV=2                  | MOUSE | 20 |
| 324 | 34.77 | 34.91 | 41.83 | 27.15 | sp Q9D0R2 SYTC_MOUSE           | Threonine--tRNA ligase 1, cytoplasmic OS=Mus musculus OX=10090 GN=Tars1 PE=1 SV=2                | MOUSE | 16 |
| 325 | 34.74 | 34.84 | 54.33 | 46.55 | tr Q768S5 Q768S5_MOUSE         | Rabphilin OS=Mus musculus OX=10090 GN=Rph3a PE=2 SV=1                                            | MOUSE | 19 |
| 326 | 34.68 | 34.72 | 55.33 | 53.74 | tr F6RJV6 F6RJV6_MOUSE         | LanC-like protein 2 (Fragment) OS=Mus musculus OX=10090 GN=Lanl2 PE=1 SV=1                       | MOUSE | 18 |
| 327 | 34.6  | 34.64 | 40.28 | 34.79 | tr Q543B9 Q543B9_MOUSE         | Prolyl endopeptidase OS=Mus musculus OX=10090 GN=Prep PE=1 SV=1                                  | MOUSE | 18 |
| 328 | 34.46 | 34.52 | 63.29 | 52.95 | tr Q3UVJ2 Q3UVJ2_MOUSE         | Adenylyl cyclase-associated protein OS=Mus musculus OX=10090 GN=Cap1 PE=2 SV=1                   | MOUSE | 18 |

|     |       |       |       |       |                                |                                                                                                                          |       |    |
|-----|-------|-------|-------|-------|--------------------------------|--------------------------------------------------------------------------------------------------------------------------|-------|----|
| 329 | 34.45 | 34.49 | 47.80 | 41.87 | tr Q3TWG5 Q3TWG5_MOUSE         | Dynein light intermediate chain OS=Mus musculus OX=10090 GN=Dync1li1 PE=1 SV=1                                           | MOUSE | 17 |
| 330 | 34.43 | 39.32 | 62.44 | 56.70 | tr Q545N7 Q545N7_MOUSE         | Creatine kinase OS=Mus musculus OX=10090 GN=Ckmt1 PE=1 SV=1                                                              | MOUSE | 21 |
| 331 | 34.37 | 34.42 | 58.82 | 44.65 | tr Q6P5I3 Q6P5I3_MOUSE         | S-(hydroxymethyl)glutathione dehydrogenase OS=Mus musculus OX=10090 GN=Adh5 PE=1 SV=2                                    | MOUSE | 18 |
| 332 | 34.33 | 36.08 | 43.25 | 38.29 | sp O35841 API5_MOUSE           | Apoptosis inhibitor 5 OS=Mus musculus OX=10090 GN=Api5 PE=1 SV=2                                                         | MOUSE | 20 |
| 333 | 34.31 | 34.35 | 50.20 | 47.85 | tr Q3U6F6 Q3U6F6_MOUSE         | Seryl-tRNA synthetase OS=Mus musculus OX=10090 GN=Sars PE=2 SV=1                                                         | MOUSE | 20 |
| 334 | 34.28 | 34.42 | 58.18 | 53.62 | tr Q91V28 Q91V28_MOUSE         | 6-phosphogluconate dehydrogenase, decarboxylating OS=Mus musculus OX=10090 GN=Pgd PE=2 SV=1                              | MOUSE | 19 |
| 335 | 34.24 | 34.32 | 47.12 | 42.86 | sp Q9D394 RUFY3_MOUSE          | Protein RUFY3 OS=Mus musculus OX=10090 GN=Rufy3 PE=1 SV=1                                                                | MOUSE | 19 |
| 336 | 34.17 | 34.25 | 64.66 | 50.94 | tr Q4FJZ4 Q4FJZ4_MOUSE         | T1-TrpRS OS=Mus musculus OX=10090 GN=Wars PE=2 SV=1                                                                      | MOUSE | 19 |
| 337 | 33.97 | 34    | 63.27 | 60.86 | tr A0A0R3P9C8 A0A0R3P9C8_MOUSE | NADH dehydrogenase [ubiquinone] 1 alpha subcomplex subunit 9, mitochondrial OS=Mus musculus OX=10090 GN=Ndufa9 PE=1 SV=1 | MOUSE | 17 |
| 338 | 33.96 | 34.41 | 42.47 | 33.33 | tr A0A498WGK2 A0A498WGK2_MOUSE | Asparagine--tRNA ligase OS=Mus musculus OX=10090 GN=Nars PE=1 SV=1                                                       | MOUSE | 17 |
| 339 | 33.95 | 33.97 | 86.41 | 85.33 | tr A5GZX3 A5GZX3_MOUSE         | Lactoylglutathione lyase OS=Mus musculus OX=10090 GN=Glo1 PE=1 SV=1                                                      | MOUSE | 31 |
| 340 | 33.79 | 48.67 | 46.63 | 38.12 | tr B2RXT3 B2RXT3_MOUSE         | Oxoglutarate dehydrogenase (succinyl-transferring) OS=Mus musculus OX=10090 GN=Ogdhl PE=1 SV=1                           | MOUSE | 26 |
| 341 | 33.72 | 33.74 | 65.61 | 61.15 | tr Q5SX53 Q5SX53_MOUSE         | Uncharacterized protein OS=Mus musculus OX=10090 GN=Slc25a11 PE=1 SV=1                                                   | MOUSE | 20 |
| 342 | 33.71 | 33.76 | 78.55 | 76.03 | sp P68040 RACK1_MOUSE          | Receptor of activated protein C kinase 1 OS=Mus musculus OX=10090 GN=Rack1 PE=1 SV=3                                     | MOUSE | 20 |
| 343 | 33.51 | 33.52 | 26.95 | 21.97 | sp Q9JIS5 SV2A_MOUSE           | Synaptic vesicle glycoprotein 2A OS=Mus musculus OX=10090 GN=Sv2a PE=1 SV=1                                              | MOUSE | 22 |
| 344 | 33.36 | 38.69 | 14.00 | 10.98 | tr A2ARP8 A2ARP8_MOUSE         | Microtubule-associated protein 1A OS=Mus musculus OX=10090 GN=Map1a PE=1 SV=1                                            | MOUSE | 22 |

|     |       |       |       |       |                        |                                                                                                                                             |       |    |
|-----|-------|-------|-------|-------|------------------------|---------------------------------------------------------------------------------------------------------------------------------------------|-------|----|
| 345 | 33.31 | 33.73 | 26.45 | 17.70 | sp Q91ZW3 SMCA5_MOUSE  | SWI/SNF-related matrix-associated actin-dependent regulator of chromatin subfamily A member 5 OS=Mus musculus OX=10090 GN=Smarca5 PE=1 SV=1 | MOUSE | 17 |
| 346 | 33.15 | 33.17 | 47.03 | 46.61 | tr Q8C2Q7 Q8C2Q7_MOUSE | Heterogeneous nuclear ribonucleoprotein H OS=Mus musculus OX=10090 GN=Hnrnp1 PE=1 SV=1                                                      | MOUSE | 22 |
| 347 | 33.06 | 33.17 | 26.16 | 19.96 | sp Q9JIX8 ACINU_MOUSE  | Apoptotic chromatin condensation inducer in the nucleus OS=Mus musculus OX=10090 GN=Acin1 PE=1 SV=3                                         | MOUSE | 21 |
| 348 | 32.97 | 32.99 | 64.54 | 51.25 | sp Q3UM45 PP1R7_MOUSE  | Protein phosphatase 1 regulatory subunit 7 OS=Mus musculus OX=10090 GN=Ppp1r7 PE=1 SV=2                                                     | MOUSE | 16 |
| 349 | 32.86 | 32.88 | 50.54 | 45.14 | sp Q91WD5 NDUS2_MOUSE  | NADH dehydrogenase [ubiquinone] iron-sulfur protein 2, mitochondrial OS=Mus musculus OX=10090 GN=Ndufs2 PE=1 SV=1                           | MOUSE | 18 |
| 350 | 32.74 | 32.79 | 56.54 | 47.88 | sp Q9D0K2 SCOT1_MOUSE  | Succinyl-CoA:3-ketoacid coenzyme A transferase 1, mitochondrial OS=Mus musculus OX=10090 GN=Oxct1 PE=1 SV=1                                 | MOUSE | 18 |
| 351 | 32.54 | 32.56 | 27.43 | 22.74 | sp Q99MR6 SRRT_MOUSE   | Serrate RNA effector molecule homolog OS=Mus musculus OX=10090 GN=Srrt PE=1 SV=1                                                            | MOUSE | 17 |
| 352 | 32.52 | 32.53 | 37.71 | 34.29 | tr Q49S98 Q49S98_MOUSE | Vasicular inhibitory amino acid transporter 10D OS=Mus musculus OX=10090 GN=Slc32a1 PE=2 SV=1                                               | MOUSE | 18 |
| 353 | 32.47 | 32.5  | 51.15 | 46.55 | sp Q9WV02 RBMX_MOUSE   | RNA-binding motif protein, X chromosome OS=Mus musculus OX=10090 GN=RbmX PE=1 SV=1                                                          | MOUSE | 18 |
| 354 | 32.43 | 32.46 | 81.74 | 80.06 | sp P60335 PCBP1_MOUSE  | Poly(rC)-binding protein 1 OS=Mus musculus OX=10090 GN=Pcbp1 PE=1 SV=1                                                                      | MOUSE | 24 |
| 355 | 32.38 | 32.39 | 74.49 | 56.49 | tr Q3TG75 Q3TG75_MOUSE | Ornithine--oxo-acid aminotransferase OS=Mus musculus OX=10090 GN=Oat PE=1 SV=1                                                              | MOUSE | 18 |
| 356 | 32.35 | 32.35 | 40.49 | 40.49 | sp O35381 AN32A_MOUSE  | Acidic leucine-rich nuclear phosphoprotein 32 family member A OS=Mus musculus OX=10090 GN=Anp32a PE=1 SV=1                                  | MOUSE | 18 |
| 357 | 32.29 | 32.37 | 29.35 | 17.56 | sp Q3UPL0 SC31A_MOUSE  | Protein transport protein Sec31A OS=Mus musculus OX=10090 GN=Sec31a PE=1 SV=2                                                               | MOUSE | 16 |
| 358 | 32.26 | 32.26 | 66.80 | 66.80 | sp Q9QW08 PHOS_MOUSE   | Phosducin OS=Mus musculus OX=10090 GN=Pdc PE=2 SV=1                                                                                         | MOUSE | 21 |
| 359 | 32.22 | 32.23 | 56.61 | 47.11 | tr Q3TMB8 Q3TMB8_MOUSE | Adenylosuccinate lyase OS=Mus musculus OX=10090 GN=Adsl PE=2 SV=1                                                                           | MOUSE | 16 |

|     |       |       |       |       |                                |                                                                                                   |       |    |
|-----|-------|-------|-------|-------|--------------------------------|---------------------------------------------------------------------------------------------------|-------|----|
| 360 | 32.2  | 32.22 | 62.23 | 61.97 | sp Q8R5C5 ACTY_MOUSE           | Beta-centractin OS=Mus musculus OX=10090 GN=Actr1b PE=1 SV=1                                      | MOUSE | 19 |
| 361 | 32.19 | 32.23 | 38.83 | 35.90 | sp Q9D517 PLCC_MOUSE           | 1-acyl-sn-glycerol-3-phosphate acyltransferase gamma OS=Mus musculus OX=10090 GN=Agpat3 PE=1 SV=2 | MOUSE | 19 |
| 362 | 32.1  | 32.34 | 37.36 | 27.70 | sp Q9JIF7 COPB_MOUSE           | Coatomer subunit beta OS=Mus musculus OX=10090 GN=Copb1 PE=1 SV=1                                 | MOUSE | 20 |
| 363 | 32.05 | 32.11 | 28.76 | 20.10 | tr Q8CIJ3 Q8CIJ3_MOUSE         | Eukaryotic translation initiation factor 3 subunit B OS=Mus musculus OX=10090 GN=Eif3b PE=2 SV=1  | MOUSE | 18 |
| 364 | 32.04 | 32.07 | 47.33 | 43.62 | tr A2ALV3 A2ALV3_MOUSE         | Endophilin-A1 OS=Mus musculus OX=10090 GN=Sh3gl2 PE=1 SV=1                                        | MOUSE | 19 |
| 365 | 32    | 32    | 58.59 | 58.59 | tr Q5I0W0 Q5I0W0_MOUSE         | ATP synthase subunit b OS=Mus musculus OX=10090 GN=Atp5pb PE=1 SV=1                               | MOUSE | 17 |
| 366 | 31.97 | 31.99 | 61.02 | 60.00 | sp Q60930 VDAC2_MOUSE          | Voltage-dependent anion-selective channel protein 2 OS=Mus musculus OX=10090 GN=Vdac2 PE=1 SV=2   | MOUSE | 25 |
| 367 | 31.9  | 32.04 | 32.71 | 19.48 | sp Q920I9 WDR7_MOUSE           | WD repeat-containing protein 7 OS=Mus musculus OX=10090 GN=Wdr7 PE=1 SV=3                         | MOUSE | 17 |
| 368 | 31.86 | 31.99 | 38.25 | 27.61 | sp Q8R0Y6 AL1L1_MOUSE          | Cytosolic 10-formyltetrahydrofolate dehydrogenase OS=Mus musculus OX=10090 GN=Aldh1l1 PE=1 SV=1   | MOUSE | 20 |
| 369 | 31.85 | 31.88 | 43.13 | 36.87 | tr Q564E6 Q564E6_MOUSE         | Ssb protein OS=Mus musculus OX=10090 GN=Ssb PE=1 SV=1                                             | MOUSE | 18 |
| 370 | 31.81 | 32.47 | 72.41 | 57.14 | tr Q14AI7 Q14AI7_MOUSE         | COP9 signalosome complex subunit 4 OS=Mus musculus OX=10090 GN=Cops4 PE=1 SV=1                    | MOUSE | 17 |
| 371 | 31.73 | 31.8  | 28.75 | 24.24 | tr B2RSC8 B2RSC8_MOUSE         | E3 ubiquitin-protein ligase OS=Mus musculus OX=10090 GN=Nedd4 PE=1 SV=1                           | MOUSE | 17 |
| 372 | 31.7  | 31.78 | 20.63 | 14.51 | sp Q6P5E4 UGGG1_MOUSE          | UDP-glucose:glycoprotein glucosyltransferase 1 OS=Mus musculus OX=10090 GN=Uggt1 PE=1 SV=4        | MOUSE | 16 |
| 373 | 31.67 | 31.8  | 35.59 | 25.55 | sp Q04750 TOP1_MOUSE           | DNA topoisomerase 1 OS=Mus musculus OX=10090 GN=Top1 PE=1 SV=2                                    | MOUSE | 19 |
| 374 | 31.61 | 32.01 | 50.26 | 27.56 | sp P26041 MOES_MOUSE           | Moesin OS=Mus musculus OX=10090 GN=Msn PE=1 SV=3                                                  | MOUSE | 16 |
| 375 | 31.58 | 31.64 | 64.64 | 59.70 | tr Q545X8 Q545X8_MOUSE         | 40S ribosomal protein S4 OS=Mus musculus OX=10090 GN=Rps4x PE=1 SV=1                              | MOUSE | 18 |
| 376 | 31.48 | 33.62 | 31.96 | 25.42 | tr A0A571BEK3 A0A571BEK3_MOUSE | Disks large homolog 2 OS=Mus musculus OX=10090 GN=Dlg2 PE=1 SV=1                                  | MOUSE | 18 |

|     |       |       |       |       |                                |                                                                                              |       |    |
|-----|-------|-------|-------|-------|--------------------------------|----------------------------------------------------------------------------------------------|-------|----|
| 377 | 31.47 | 31.65 | 31.35 | 24.71 | sp Q9WU78-3 PDC6I_MOUSE        | Isoform 3 of Programmed cell death 6-interacting protein OS=Mus musculus OX=10090 GN=Pdcd6ip | MOUSE | 18 |
| 378 | 31.34 | 31.36 | 53.70 | 45.14 | tr A0A0R4J0B4 A0A0R4J0B4_MOUSE | CMP-N-acetylneuraminic acid synthase OS=Mus musculus OX=10090 GN=Cmas PE=1 SV=1              | MOUSE | 16 |
| 379 | 31.28 | 31.81 | 29.79 | 17.43 | sp Q8BU30 SYIC_MOUSE           | Isoleucine--tRNA ligase, cytoplasmic OS=Mus musculus OX=10090 GN=lars1 PE=1 SV=2             | MOUSE | 20 |
| 380 | 31.23 | 31.54 | 69.25 | 64.68 | sp Q99KP6 PRP19_MOUSE          | Pre-mRNA-processing factor 19 OS=Mus musculus OX=10090 GN=Prpf19 PE=1 SV=1                   | MOUSE | 18 |
| 381 | 31.22 | 31.26 | 78.26 | 78.26 | tr Q4FJQ0 Q4FJQ0_MOUSE         | Rab7 OS=Mus musculus OX=10090 GN=Rab7 PE=1 SV=1                                              | MOUSE | 17 |
| 382 | 31.11 | 31.21 | 27.46 | 20.52 | sp Q9EPL8 IPO7_MOUSE           | Importin-7 OS=Mus musculus OX=10090 GN=Ipo7 PE=1 SV=2                                        | MOUSE | 15 |
| 383 | 31.02 | 31.04 | 59.74 | 50.77 | tr Q3UXI9 Q3UXI9_MOUSE         | DZF domain-containing protein OS=Mus musculus OX=10090 GN=Ilf2 PE=2 SV=1                     | MOUSE | 17 |
| 384 | 30.96 | 35.08 | 61.63 | 56.73 | tr A3KML3 A3KML3_MOUSE         | 14-3-3 protein theta OS=Mus musculus OX=10090 GN=Ywhaq PE=2 SV=1                             | MOUSE | 20 |
| 385 | 30.95 | 31.08 | 57.49 | 50.48 | sp Q9CZC8 SCRN1_MOUSE          | Secernin-1 OS=Mus musculus OX=10090 GN=Scrn1 PE=1 SV=1                                       | MOUSE | 18 |
| 386 | 30.94 | 30.99 | 45.34 | 40.81 | tr Q3TA40 Q3TA40_MOUSE         | RIKEN cDNA 6430548M08 gene OS=Mus musculus OX=10090 GN=6430548M08Rik PE=1 SV=1               | MOUSE | 15 |
| 387 | 30.91 | 41.71 | 22.50 | 12.71 | tr Q3UGY4 Q3UGY4_MOUSE         | Spectrin beta chain OS=Mus musculus OX=10090 GN=Sptb PE=2 SV=1                               | MOUSE | 21 |
| 388 | 30.88 | 33.08 | 49.12 | 42.26 | sp P54071 IDHP_MOUSE           | Isocitrate dehydrogenase [NADP], mitochondrial OS=Mus musculus OX=10090 GN=Idh2 PE=1 SV=3    | MOUSE | 18 |
| 389 | 30.86 | 30.93 | 60.47 | 51.38 | tr H7BX95 H7BX95_MOUSE         | Serine/arginine-rich splicing factor 1 OS=Mus musculus OX=10090 GN=Srsf1 PE=1 SV=1           | MOUSE | 17 |
| 390 | 30.85 | 30.86 | 45.41 | 40.82 | tr Q9CSH0 Q9CSH0_MOUSE         | Uncharacterized protein (Fragment) OS=Mus musculus OX=10090 GN=Hnrnp1l PE=2 SV=1             | MOUSE | 16 |
| 391 | 30.76 | 30.79 | 88.82 | 80.12 | sp Q9DCX2 ATP5H_MOUSE          | ATP synthase subunit d, mitochondrial OS=Mus musculus OX=10090 GN=Atp5pd PE=1 SV=3           | MOUSE | 19 |
| 392 | 30.72 | 30.74 | 42.36 | 38.67 | sp Q9Z273 TULP1_MOUSE          | Tubby-related protein 1 OS=Mus musculus OX=10090 GN=Tulp1 PE=1 SV=1                          | MOUSE | 18 |
| 393 | 30.62 | 31.09 | 13.02 | 5.31  | sp Q9QXS1 PLEC_MOUSE           | Plectin OS=Mus musculus OX=10090 GN=Plec PE=1 SV=3                                           | MOUSE | 17 |



|     |       |       |       |       |                                |                                                                                                                 |       |    |
|-----|-------|-------|-------|-------|--------------------------------|-----------------------------------------------------------------------------------------------------------------|-------|----|
| 394 | 30.62 | 30.65 | 65.26 | 55.79 | sp Q9CWS0 DDAH1_MOUSE          | N(G),N(G)-dimethylarginine dimethylaminohydrolase 1<br>OS=Mus musculus OX=10090 GN=Ddah1 PE=1 SV=3              | MOUSE | 16 |
| 395 | 30.55 | 30.66 | 36.19 | 28.39 | tr A0A0R4J0Z1 A0A0R4J0Z1_MOUSE | Protein disulfide-isomerase A4 OS=Mus musculus<br>OX=10090 GN=Pdia4 PE=1 SV=1                                   | MOUSE | 17 |
| 396 | 30.5  | 30.57 | 34.30 | 27.25 | sp Q4KMM3 OXR1_MOUSE           | Oxidation resistance protein 1 OS=Mus musculus OX=10090<br>GN=Oxr1 PE=1 SV=3                                    | MOUSE | 16 |
| 397 | 30.48 | 30.54 | 57.14 | 50.83 | sp Q5XG69 F169A_MOUSE          | Soluble lamin-associated protein of 75 kDa OS=Mus musculus<br>OX=10090 GN=Fam169a PE=1 SV=3                     | MOUSE | 19 |
| 398 | 30.47 | 30.58 | 36.30 | 20.17 | sp Q64727 VINC_MOUSE           | Vinculin OS=Mus musculus OX=10090 GN=Vcl PE=1 SV=4                                                              | MOUSE | 15 |
| 399 | 30.45 | 30.62 | 27.22 | 18.11 | sp Q8R1B4 EIF3C_MOUSE          | Eukaryotic translation initiation factor 3 subunit C OS=Mus musculus<br>OX=10090 GN=Elf3c PE=1 SV=1             | MOUSE | 19 |
| 400 | 30.35 | 30.35 | 64.94 | 59.41 | sp Q08331 CALB2_MOUSE          | Calretinin OS=Mus musculus OX=10090 GN=Calb2 PE=1<br>SV=3                                                       | MOUSE | 18 |
| 401 | 30.31 | 34.09 | 28.57 | 23.58 | sp Q91ZQ1 PDE6C_MOUSE          | Cone cGMP-specific 3',5'-cyclic phosphodiesterase subunit alpha' OS=Mus musculus<br>OX=10090 GN=Pde6c PE=2 SV=1 | MOUSE | 20 |
| 402 | 30.31 | 30.36 | 58.85 | 48.33 | tr Q3TGW0 Q3TGW0_MOUSE         | Actin-like protein 3 OS=Mus musculus OX=10090<br>GN=Actr3 PE=2 SV=1                                             | MOUSE | 15 |
| 403 | 30.29 | 70.1  | 77.11 | 74.89 | sp Q9ERD7 TBB3_MOUSE           | Tubulin beta-3 chain OS=Mus musculus OX=10090<br>GN=Tubb3 PE=1 SV=1                                             | MOUSE | 77 |
| 404 | 30.26 | 30.33 | 13.78 | 7.87  | tr Q4FE56 Q4FE56_MOUSE         | Ubiquitinyl hydrolase 1 OS=Mus musculus OX=10090<br>GN=Usp9x PE=1 SV=1                                          | MOUSE | 18 |
| 405 | 30.23 | 30.27 | 48.55 | 47.40 | tr Q3UWK3 Q3UWK3_MOUSE         | Uncharacterized protein OS=Mus musculus OX=10090<br>GN=Prph2 PE=2 SV=1                                          | MOUSE | 26 |
| 406 | 30.2  | 30.21 | 62.12 | 56.06 | tr Q564F3 Q564F3_MOUSE         | 40S ribosomal protein S3a OS=Mus musculus OX=10090<br>GN=Rps3a1 PE=1 SV=1                                       | MOUSE | 15 |
| 407 | 30.12 | 30.16 | 33.70 | 27.58 | tr E9Q1S3 E9Q1S3_MOUSE         | Protein transport protein SEC23 OS=Mus musculus<br>OX=10090 GN=Sec23a PE=1 SV=1                                 | MOUSE | 14 |
| 408 | 30.1  | 30.21 | 25.89 | 13.58 | tr E1AZ71 E1AZ71_MOUSE         | Cyclic nucleotide-gated channel beta 1 OS=Mus musculus<br>OX=10090 GN=Cngb1 PE=1 SV=1                           | MOUSE | 14 |
| 409 | 30.05 | 30.13 | 50.79 | 44.64 | sp Q8BJY1 PSMD5_MOUSE          | 26S proteasome non-ATPase regulatory subunit 5 OS=Mus musculus<br>OX=10090 GN=Psm5 PE=1 SV=4                    | MOUSE | 17 |

|     |       |       |       |       |                                |                                                                                                                           |       |    |
|-----|-------|-------|-------|-------|--------------------------------|---------------------------------------------------------------------------------------------------------------------------|-------|----|
| 410 | 30.03 | 30.08 | 64.71 | 64.09 | tr A0A1B0GRV0 A0A1B0GRV0_MOUSE | 3'(2'),5'-bisphosphate nucleotidase 1 OS=Mus musculus<br>OX=10090 GN=Bpnt1 PE=1 SV=1                                      | MOUSE | 16 |
| 411 | 29.88 | 29.97 | 51.42 | 43.06 | sp Q69Z99 ZN512_MOUSE          | Zinc finger protein 512 OS=Mus musculus OX=10090<br>GN=Znf512 PE=2 SV=2                                                   | MOUSE | 16 |
| 412 | 29.86 | 34.24 | 52.42 | 50.27 | sp Q8CCK0 H2AW_MOUSE           | Core histone macro-H2A.2 OS=Mus musculus OX=10090<br>GN=Macroh2a2 PE=1 SV=3                                               | MOUSE | 18 |
| 413 | 29.84 | 30.01 | 31.06 | 16.43 | tr Q53WR6 Q53WR6_MOUSE         | Golgi apparatus protein 1 OS=Mus musculus OX=10090<br>GN=Glg1 PE=1 SV=1                                                   | MOUSE | 15 |
| 414 | 29.83 | 29.92 | 46.40 | 30.24 | sp Q8JZN5 ACAD9_MOUSE          | Complex I assembly factor ACAD9, mitochondrial OS=Mus musculus OX=10090 GN=Acad9 PE=1 SV=2                                | MOUSE | 18 |
| 415 | 29.83 | 29.89 | 57.19 | 54.52 | tr Q3V235 Q3V235_MOUSE         | Prohibitin OS=Mus musculus OX=10090 GN=Phb2 PE=1<br>SV=1                                                                  | MOUSE | 15 |
| 416 | 29.81 | 29.91 | 64.68 | 50.75 | tr Q3TPZ5 Q3TPZ5_MOUSE         | Uncharacterized protein OS=Mus musculus OX=10090<br>GN=Dctn2 PE=1 SV=1                                                    | MOUSE | 17 |
| 417 | 29.81 | 29.86 | 64.09 | 61.41 | sp Q9CPV4 GLOD4_MOUSE          | Glyoxalase domain-containing protein 4 OS=Mus musculus<br>OX=10090 GN=Glod4 PE=1 SV=1                                     | MOUSE | 16 |
| 418 | 29.77 | 30.15 | 38.57 | 27.36 | tr E9QB02 E9QB02_MOUSE         | Methionine--tRNA ligase, cytoplasmic OS=Mus musculus<br>OX=10090 GN=Mars1 PE=1 SV=1                                       | MOUSE | 18 |
| 419 | 29.72 | 30    | 64.45 | 41.91 | tr Q4FJV4 Q4FJV4_MOUSE         | Annexin OS=Mus musculus OX=10090 GN=Anxa1 PE=1<br>SV=1                                                                    | MOUSE | 17 |
| 420 | 29.66 | 29.79 | 48.75 | 46.01 | sp Q5FWK3 RHG01_MOUSE          | Rho GTPase-activating protein 1 OS=Mus musculus<br>OX=10090 GN=Arhgap1 PE=1 SV=1                                          | MOUSE | 16 |
| 421 | 29.65 | 29.71 | 54.56 | 45.23 | sp Q61553 FSCN1_MOUSE          | Fascin OS=Mus musculus OX=10090 GN=Fscn1 PE=1 SV=4                                                                        | MOUSE | 18 |
| 422 | 29.63 | 29.81 | 36.56 | 29.25 | tr Q3TG12 Q3TG12_MOUSE         | Phenylalanyl-tRNA synthetase beta subunit (Fragment)<br>OS=Mus musculus OX=10090 GN=Farsb PE=2 SV=1                       | MOUSE | 16 |
| 423 | 29.6  | 29.7  | 49.01 | 37.66 | tr Q8BMR3 Q8BMR3_MOUSE         | Dolichyl-diphosphooligosaccharide--protein<br>glycosyltransferase subunit 1 OS=Mus musculus OX=10090<br>GN=Rpn1 PE=2 SV=1 | MOUSE | 16 |
| 424 | 29.6  | 29.64 | 55.84 | 53.94 | tr Q544Z7 Q544Z7_MOUSE         | DNA-(apurinic or apyrimidinic site) endonuclease OS=Mus musculus OX=10090 GN=Apex1 PE=1 SV=1                              | MOUSE | 19 |
| 425 | 29.57 | 29.71 | 16.53 | 13.15 | sp Q61191 HCFC1_MOUSE          | Host cell factor 1 OS=Mus musculus OX=10090 GN=Hcfc1<br>PE=1 SV=2                                                         | MOUSE | 19 |

|     |       |       |       |       |                                |                                                                                                  |       |    |
|-----|-------|-------|-------|-------|--------------------------------|--------------------------------------------------------------------------------------------------|-------|----|
| 426 | 29.56 | 29.61 | 49.04 | 41.15 | sp Q8BGH2 SAM50_MOUSE          | Sorting and assembly machinery component 50 homolog OS=Mus musculus OX=10090 GN=Samm50 PE=1 SV=1 | MOUSE | 18 |
| 427 | 29.44 | 29.58 | 37.36 | 34.48 | sp P15409 OPSD_MOUSE           | Rhodopsin OS=Mus musculus OX=10090 GN=Rho PE=1 SV=2                                              | MOUSE | 34 |
| 428 | 29.42 | 29.56 | 37.63 | 29.81 | sp Q9ERL9 GCYA1_MOUSE          | Guanylate cyclase soluble subunit alpha-1 OS=Mus musculus OX=10090 GN=Gucy1a1 PE=1 SV=2          | MOUSE | 14 |
| 429 | 29.35 | 47.73 | 55.73 | 46.09 | tr E9PZ43 E9PZ43_MOUSE         | Microtubule-associated protein OS=Mus musculus OX=10090 GN=Map4 PE=1 SV=3                        | MOUSE | 25 |
| 430 | 29.34 | 29.44 | 54.77 | 48.41 | tr Q542I9 Q542I9_MOUSE         | AAA domain-containing protein OS=Mus musculus OX=10090 GN=Psmc1 PE=1 SV=1                        | MOUSE | 16 |
| 431 | 29.32 | 31.19 | 51.35 | 39.54 | sp P54823 DDX6_MOUSE           | Probable ATP-dependent RNA helicase DDX6 OS=Mus musculus OX=10090 GN=Ddx6 PE=1 SV=1              | MOUSE | 15 |
| 432 | 29.3  | 30.48 | 37.02 | 22.21 | sp Q9Z1Z0 USO1_MOUSE           | General vesicular transport factor p115 OS=Mus musculus OX=10090 GN=Uso1 PE=1 SV=2               | MOUSE | 16 |
| 433 | 29.25 | 29.38 | 50.30 | 48.70 | sp Q3UEB3-3 PUF60_MOUSE        | Isoform 3 of Poly(U)-binding-splicing factor PUF60 OS=Mus musculus OX=10090 GN=Puf60             | MOUSE | 17 |
| 434 | 29.24 | 30.33 | 51.97 | 37.34 | tr A0A0G2JGS4 A0A0G2JGS4_MOUSE | Calcium/calmodulin-dependent protein kinase OS=Mus musculus OX=10090 GN=Camk2d PE=1 SV=1         | MOUSE | 18 |
| 435 | 29.2  | 29.34 | 45.55 | 35.63 | tr Q3THE7 Q3THE7_MOUSE         | Aldedh domain-containing protein OS=Mus musculus OX=10090 GN=Aldh9a1 PE=2 SV=1                   | MOUSE | 16 |
| 436 | 29.16 | 29.22 | 42.33 | 32.49 | tr Q4FZK2 Q4FZK2_MOUSE         | Elongation factor 1-gamma OS=Mus musculus OX=10090 GN=Eef1g PE=1 SV=1                            | MOUSE | 14 |
| 437 | 29.1  | 29.19 | 44.14 | 36.67 | sp Q99KE1 MAOM_MOUSE           | NAD-dependent malic enzyme, mitochondrial OS=Mus musculus OX=10090 GN=Me2 PE=1 SV=1              | MOUSE | 15 |
| 438 | 29.07 | 29.1  | 77.29 | 77.29 | tr E9Q7K1 E9Q7K1_MOUSE         | Guanylate kinase OS=Mus musculus OX=10090 GN=Guk1 PE=1 SV=1                                      | MOUSE | 17 |
| 439 | 29.06 | 49.12 | 30.60 | 12.75 | tr K3W4R2 K3W4R2_MOUSE         | Myosin-14 OS=Mus musculus OX=10090 GN=Myh14 PE=1 SV=1                                            | MOUSE | 22 |
| 440 | 29.06 | 29.21 | 51.38 | 42.13 | sp Q8C0C7 SYFA_MOUSE           | Phenylalanine--tRNA ligase alpha subunit OS=Mus musculus OX=10090 GN=Farsa PE=1 SV=1             | MOUSE | 14 |
| 441 | 29.02 | 29.1  | 31.62 | 25.79 | sp Q03717 KCNB1_MOUSE          | Potassium voltage-gated channel subfamily B member 1 OS=Mus musculus OX=10090 GN=Kcnb1 PE=1 SV=2 | MOUSE | 16 |
| 442 | 28.93 | 31.31 | 70.37 | 65.74 | sp O35295 PURB_MOUSE           | Transcriptional activator protein Pur-beta OS=Mus musculus OX=10090 GN=Purb PE=1 SV=3            | MOUSE | 19 |

|     |       |       |       |       |                        |                                                                                                            |       |    |
|-----|-------|-------|-------|-------|------------------------|------------------------------------------------------------------------------------------------------------|-------|----|
| 443 | 28.88 | 28.92 | 64.92 | 47.69 | sp Q9JII6 AK1A1_MOUSE  | Aldo-keto reductase family 1 member A1 OS=Mus musculus OX=10090 GN=Akr1a1 PE=1 SV=3                        | MOUSE | 16 |
| 444 | 28.8  | 28.91 | 65.37 | 54.88 | tr Q5SW18 Q5SW18_MOUSE | Platelet-activating factor acetylhydrolase IB subunit alpha OS=Mus musculus OX=10090 GN=Pafah1b1 PE=2 SV=1 | MOUSE | 15 |
| 445 | 28.79 | 28.81 | 63.41 | 55.43 | sp Q91WD9 SEGN_MOUSE   | Secretagogen OS=Mus musculus OX=10090 GN=Scgn PE=2 SV=1                                                    | MOUSE | 15 |
| 446 | 28.76 | 28.83 | 52.45 | 52.15 | tr Q8BM84 Q8BM84_MOUSE | ELAV-like protein OS=Mus musculus OX=10090 GN=Elavl1 PE=2 SV=1                                             | MOUSE | 19 |
| 447 | 28.72 | 28.85 | 57.14 | 55.43 | sp Q9R1T2 SAE1_MOUSE   | SUMO-activating enzyme subunit 1 OS=Mus musculus OX=10090 GN=Sae1 PE=1 SV=1                                | MOUSE | 17 |
| 448 | 28.71 | 32.33 | 39.19 | 39.19 | tr Q1WWK3 Q1WWK3_MOUSE | Hist1h1b protein (Fragment) OS=Mus musculus OX=10090 GN=H1f5 PE=2 SV=1                                     | MOUSE | 25 |
| 449 | 28.71 | 30.57 | 29.69 | 24.33 | sp Q8VDM6 HNRL1_MOUSE  | Heterogeneous nuclear ribonucleoprotein U-like protein 1 OS=Mus musculus OX=10090 GN=Hnrnpul1 PE=1 SV=1    | MOUSE | 16 |
| 450 | 28.7  | 28.76 | 46.44 | 45.06 | tr G3UZM4 G3UZM4_MOUSE | Cell adhesion molecule 2 (Fragment) OS=Mus musculus OX=10090 GN=Cadm2 PE=1 SV=1                            | MOUSE | 19 |
| 451 | 28.62 | 28.65 | 58.20 | 58.20 | sp Q9D6M3 GHC1_MOUSE   | Mitochondrial glutamate carrier 1 OS=Mus musculus OX=10090 GN=Slc25a22 PE=1 SV=1                           | MOUSE | 16 |
| 452 | 28.57 | 28.65 | 65.37 | 62.99 | sp Q99L13 3HIDH_MOUSE  | 3-hydroxyisobutyrate dehydrogenase, mitochondrial OS=Mus musculus OX=10090 GN=Hibadh PE=1 SV=1             | MOUSE | 17 |
| 453 | 28.49 | 28.51 | 76.19 | 71.43 | sp Q99LX0 PARK7_MOUSE  | Parkinson disease protein 7 homolog OS=Mus musculus OX=10090 GN=Park7 PE=1 SV=1                            | MOUSE | 18 |
| 454 | 28.44 | 28.48 | 43.91 | 41.62 | tr Q3UMW2 Q3UMW2_MOUSE | Peptidase_M24 domain-containing protein OS=Mus musculus OX=10090 GN=Pa2g4 PE=2 SV=1                        | MOUSE | 16 |
| 455 | 28.41 | 28.51 | 19.33 | 16.49 | sp Q3TES0 IQEC3_MOUSE  | IQ motif and SEC7 domain-containing protein 3 OS=Mus musculus OX=10090 GN=IQsec3 PE=1 SV=1                 | MOUSE | 16 |
| 456 | 28.37 | 28.57 | 58.99 | 54.97 | tr Q8CAJ7 Q8CAJ7_MOUSE | Aspartyl aminopeptidase OS=Mus musculus OX=10090 GN=Dnpep PE=2 SV=1                                        | MOUSE | 18 |
| 457 | 28.36 | 28.51 | 58.36 | 56.09 | tr Q3UIG8 Q3UIG8_MOUSE | Methyltransf_25 domain-containing protein OS=Mus musculus OX=10090 GN=Prmt1 PE=1 SV=1                      | MOUSE | 17 |
| 458 | 28.29 | 28.43 | 34.33 | 25.36 | tr F6ZHD8 F6ZHD8_MOUSE | 1,4-alpha-glucan branching enzyme OS=Mus musculus OX=10090 GN=Gbe1 PE=1 SV=2                               | MOUSE | 14 |
| 459 | 28.28 | 28.41 | 34.68 | 25.57 | sp Q3UYV9 NCBP1_MOUSE  | Nuclear cap-binding protein subunit 1 OS=Mus musculus OX=10090 GN=Ncbp1 PE=1 SV=2                          | MOUSE | 15 |

|     |       |       |       |       |                        |                                                                                                                     |       |    |
|-----|-------|-------|-------|-------|------------------------|---------------------------------------------------------------------------------------------------------------------|-------|----|
| 460 | 28.28 | 28.29 | 64.24 | 49.70 | sp Q91VM9 IPYR2_MOUSE  | Inorganic pyrophosphatase 2, mitochondrial OS=Mus musculus OX=10090 GN=Ppa2 PE=1 SV=1                               | MOUSE | 14 |
| 461 | 28.24 | 28.45 | 20.80 | 12.67 | tr O08847 O08847_MOUSE | DNA-directed RNA polymerase subunit OS=Mus musculus OX=10090 GN=Polr2a PE=2 SV=1                                    | MOUSE | 16 |
| 462 | 28.2  | 28.2  | 66.33 | 66.33 | tr Q3UWS9 Q3UWS9_MOUSE | Peroxiredoxin-5 (Fragment) OS=Mus musculus OX=10090 GN=Prdx5 PE=2 SV=1                                              | MOUSE | 19 |
| 463 | 28.19 | 28.2  | 43.16 | 35.26 | tr Q61833 Q61833_MOUSE | Dolichyl-diphosphooligosaccharide--protein glycosyltransferase subunit 2 OS=Mus musculus OX=10090 GN=Rpn2 PE=2 SV=1 | MOUSE | 15 |
| 464 | 28.16 | 28.23 | 45.81 | 41.62 | tr Q3U6P5 Q3U6P5_MOUSE | RRM domain-containing protein OS=Mus musculus OX=10090 GN=Hnrnpc PE=2 SV=1                                          | MOUSE | 14 |
| 465 | 28.16 | 28.2  | 60.55 | 52.29 | sp P62141 PP1B_MOUSE   | Serine/threonine-protein phosphatase PP1-beta catalytic subunit OS=Mus musculus OX=10090 GN=Ppp1cb PE=1 SV=3        | MOUSE | 15 |
| 466 | 28.13 | 28.24 | 19.56 | 15.77 | tr Q3V1M8 Q3V1M8_MOUSE | Uncharacterized protein OS=Mus musculus OX=10090 GN=Hdlbp PE=2 SV=1                                                 | MOUSE | 15 |
| 467 | 28.11 | 28.14 | 62.94 | 59.42 | tr Q3UPX0 Q3UPX0_MOUSE | Ketimine reductase mu-crystallin OS=Mus musculus OX=10090 GN=Crym PE=1 SV=1                                         | MOUSE | 17 |
| 468 | 28.1  | 28.35 | 59.24 | 41.23 | tr Q5BKQ9 Q5BKQ9_MOUSE | Proteasome (Prosome, macropain) 26S subunit, non-ATPase, 11 OS=Mus musculus OX=10090 GN=Psm11 PE=1 SV=1             | MOUSE | 17 |
| 469 | 28.08 | 28.21 | 56.51 | 53.02 | sp Q6ZWX6 IF2A_MOUSE   | Eukaryotic translation initiation factor 2 subunit 1 OS=Mus musculus OX=10090 GN=Eif2s1 PE=1 SV=3                   | MOUSE | 15 |
| 470 | 28.06 | 30.2  | 54.72 | 45.47 | tr Q544B1 Q544B1_MOUSE | Aldedh domain-containing protein OS=Mus musculus OX=10090 GN=Aldh2 PE=1 SV=1                                        | MOUSE | 17 |
| 471 | 28.06 | 28.26 | 32.03 | 23.62 | sp Q9JKR6 HYOU1_MOUSE  | Hypoxia up-regulated protein 1 OS=Mus musculus OX=10090 GN=Hyou1 PE=1 SV=1                                          | MOUSE | 16 |
| 472 | 28.05 | 28.1  | 81.93 | 80.12 | tr Q544Y7 Q544Y7_MOUSE | Cofilin, non-muscle isoform OS=Mus musculus OX=10090 GN=Cfl1 PE=2 SV=1                                              | MOUSE | 15 |
| 473 | 28.02 | 28.16 | 41.78 | 34.38 | tr B1AU25 B1AU25_MOUSE | Apoptosis-inducing factor 1, mitochondrial OS=Mus musculus OX=10090 GN=Aifm1 PE=1 SV=1                              | MOUSE | 14 |
| 474 | 28.01 | 28.04 | 64.06 | 56.58 | tr Q2UZW7 Q2UZW7_MOUSE | Microtubule-associated protein OS=Mus musculus OX=10090 GN=Mapre3 PE=1 SV=1                                         | MOUSE | 16 |

|     |       |       |       |       |                        |                                                                                                                       |       |    |
|-----|-------|-------|-------|-------|------------------------|-----------------------------------------------------------------------------------------------------------------------|-------|----|
| 475 | 27.89 | 27.96 | 34.04 | 22.55 | sp Q8CGK3 LONM_MOUSE   | Lon protease homolog, mitochondrial OS=Mus musculus<br>OX=10090 GN=Lonp1 PE=1 SV=2                                    | MOUSE | 15 |
| 476 | 27.88 | 38.42 | 82.03 | 81.02 | sp Q9DB05 SNAA_MOUSE   | Alpha-soluble NSF attachment protein OS=Mus musculus<br>OX=10090 GN=Napa PE=1 SV=1                                    | MOUSE | 22 |
| 477 | 27.82 | 27.85 | 66.54 | 66.54 | tr Q3TS44 Q3TS44_MOUSE | Proteasome subunit alpha type OS=Mus musculus<br>OX=10090 GN=Psm1 PE=1 SV=1                                           | MOUSE | 15 |
| 478 | 27.79 | 27.88 | 58.76 | 52.73 | sp Q91Z31 PTBP2_MOUSE  | Polypyrimidine tract-binding protein 2 OS=Mus musculus<br>OX=10090 GN=Ptbp2 PE=1 SV=2                                 | MOUSE | 18 |
| 479 | 27.76 | 27.87 | 38.96 | 27.43 | sp Q9CZD3 GARS_MOUSE   | Glycine--tRNA ligase OS=Mus musculus OX=10090<br>GN=Gars1 PE=1 SV=1                                                   | MOUSE | 16 |
| 480 | 27.73 | 27.78 | 35.62 | 25.52 | tr A0JNY3 A0JNY3_MOUSE | Molybdopterine molybdenumtransferase OS=Mus musculus<br>OX=10090 GN=Gphn PE=1 SV=1                                    | MOUSE | 17 |
| 481 | 27.71 | 27.73 | 53.16 | 46.52 | sp Q8BYK4 RDH12_MOUSE  | Retinol dehydrogenase 12 OS=Mus musculus OX=10090<br>GN=Rdh12 PE=2 SV=1                                               | MOUSE | 15 |
| 482 | 27.66 | 27.74 | 26.44 | 19.92 | sp Q8R1W8 IMPG1_MOUSE  | Interphotoreceptor matrix proteoglycan 1 OS=Mus<br>musculus OX=10090 GN=Impg1 PE=1 SV=1                               | MOUSE | 17 |
| 483 | 27.58 | 27.67 | 63.24 | 53.24 | sp Q8BFZ9 ERLN2_MOUSE  | Erlin-2 OS=Mus musculus OX=10090 GN=Erlin2 PE=1 SV=1                                                                  | MOUSE | 15 |
| 484 | 27.57 | 27.59 | 44.60 | 39.72 | tr Q8CAN1 Q8CAN1_MOUSE | t-SNARE coiled-coil homology domain-containing protein<br>OS=Mus musculus OX=10090 GN=Stx3 PE=2 SV=1                  | MOUSE | 15 |
| 485 | 27.55 | 27.59 | 40.49 | 38.02 | sp P10852 4F2_MOUSE    | 4F2 cell-surface antigen heavy chain OS=Mus musculus<br>OX=10090 GN=Slc3a2 PE=1 SV=1                                  | MOUSE | 14 |
| 486 | 27.53 | 29.8  | 53.41 | 49.55 | tr B7ZC46 B7ZC46_MOUSE | Septin OS=Mus musculus OX=10090 GN=Septin8 PE=1<br>SV=1                                                               | MOUSE | 17 |
| 487 | 27.44 | 27.46 | 45.80 | 43.36 | sp Q9Z2Q6 SEPT5_MOUSE  | Septin-5 OS=Mus musculus OX=10090 GN=Septin5 PE=1<br>SV=2                                                             | MOUSE | 15 |
| 488 | 27.41 | 27.44 | 97.40 | 97.40 | sp P08228 SODC_MOUSE   | Superoxide dismutase [Cu-Zn] OS=Mus musculus<br>OX=10090 GN=Sod1 PE=1 SV=2                                            | MOUSE | 15 |
| 489 | 27.39 | 27.51 | 32.49 | 26.26 | tr Q99PC9 Q99PC9_MOUSE | Serine/threonine-protein phosphatase 2A 56 kDa<br>regulatory subunit OS=Mus musculus OX=10090<br>GN=Ppp2r5d PE=2 SV=1 | MOUSE | 15 |
| 490 | 27.36 | 30.52 | 65.38 | 58.46 | tr B2RWH3 B2RWH3_MOUSE | Histone H2A OS=Mus musculus OX=10090 GN=Hist2h2aa1<br>PE=2 SV=1                                                       | MOUSE | 47 |

|     |       |       |       |       |                        |                                                                                                                           |       |    |
|-----|-------|-------|-------|-------|------------------------|---------------------------------------------------------------------------------------------------------------------------|-------|----|
| 491 | 27.34 | 27.49 | 46.26 | 44.90 | tr Q3UG68 Q3UG68_MOUSE | Dolichyl-diphosphooligosaccharide--protein glycosyltransferase 48 kDa subunit OS=Mus musculus OX=10090 GN=Ddost PE=2 SV=1 | MOUSE | 15 |
| 492 | 27.34 | 27.44 | 64.38 | 56.85 | tr Q5SQB7 Q5SQB7_MOUSE | Nucleophosmin OS=Mus musculus OX=10090 GN=Npm1 PE=1 SV=1                                                                  | MOUSE | 16 |
| 493 | 27.34 | 27.37 | 52.15 | 48.10 | sp P62881 GNB5_MOUSE   | Guanine nucleotide-binding protein subunit beta-5 OS=Mus musculus OX=10090 GN=Gnb5 PE=1 SV=1                              | MOUSE | 16 |
| 494 | 27.32 | 27.4  | 54.37 | 45.15 | tr Q3U8Y7 Q3U8Y7_MOUSE | AAA domain-containing protein OS=Mus musculus OX=10090 GN=Psmc3 PE=2 SV=1                                                 | MOUSE | 16 |
| 495 | 27.28 | 27.47 | 25.81 | 17.12 | sp Q8CFI7 RPB2_MOUSE   | DNA-directed RNA polymerase II subunit RPB2 OS=Mus musculus OX=10090 GN=Polr2b PE=1 SV=2                                  | MOUSE | 13 |
| 496 | 27.22 | 27.33 | 26.66 | 16.03 | sp Q924C1 XPO5_MOUSE   | Exportin-5 OS=Mus musculus OX=10090 GN=Xpo5 PE=1 SV=1                                                                     | MOUSE | 13 |
| 497 | 27.17 | 27.2  | 45.62 | 41.12 | tr Q8C243 Q8C243_MOUSE | Peptidase A1 domain-containing protein OS=Mus musculus OX=10090 GN=Ctsd PE=2 SV=1                                         | MOUSE | 16 |
| 498 | 27.14 | 27.29 | 10.55 | 5.56  | sp O88737 BSN_MOUSE    | Protein bassoon OS=Mus musculus OX=10090 GN=Bsn PE=1 SV=4                                                                 | MOUSE | 15 |
| 499 | 27.01 | 29.25 | 77.35 | 73.82 | tr Q54AE3 Q54AE3_MOUSE | GTP-binding protein beta3 subunit OS=Mus musculus OX=10090 GN=Gnb3 PE=3 SV=1                                              | MOUSE | 19 |
| 500 | 27.01 | 27.14 | 26.46 | 18.34 | tr A2AS98 A2AS98_MOUSE | Nck-associated protein 1 OS=Mus musculus OX=10090 GN=Nckap1 PE=1 SV=1                                                     | MOUSE | 18 |
| 501 | 27    | 27.03 | 66.67 | 58.33 | tr Q642L7 Q642L7_MOUSE | 40S ribosomal protein S27a OS=Mus musculus OX=10090 GN=Rps27a PE=2 SV=1                                                   | MOUSE | 22 |
| 502 | 26.98 | 27.13 | 35.96 | 23.67 | tr Q7TQD5 Q7TQD5_MOUSE | Carnitine O-palmitoyltransferase OS=Mus musculus OX=10090 GN=Cpt1a PE=1 SV=1                                              | MOUSE | 16 |
| 503 | 26.98 | 27.05 | 73.16 | 66.54 | sp P67778 PHB_MOUSE    | Prohibitin OS=Mus musculus OX=10090 GN=Phb PE=1 SV=1                                                                      | MOUSE | 15 |
| 504 | 26.97 | 55.24 | 34.56 | 29.05 | tr Q3UHI3 Q3UHI3_MOUSE | Calcium-transporting ATPase OS=Mus musculus OX=10090 GN=Atp2b2 PE=1 SV=1                                                  | MOUSE | 27 |
| 505 | 26.95 | 26.98 | 48.38 | 46.93 | tr Q9D066 Q9D066_MOUSE | Inositol-1-monophosphatase OS=Mus musculus OX=10090 GN=Impa1 PE=2 SV=1                                                    | MOUSE | 13 |
| 506 | 26.9  | 26.97 | 51.60 | 43.91 | tr Q8C1T5 Q8C1T5_MOUSE | Uncharacterized protein OS=Mus musculus OX=10090 GN=Napg PE=2 SV=1                                                        | MOUSE | 16 |

|     |       |       |       |       |                        |                                                                                                                                  |       |    |
|-----|-------|-------|-------|-------|------------------------|----------------------------------------------------------------------------------------------------------------------------------|-------|----|
| 507 | 26.89 | 26.99 | 51.48 | 43.33 | tr Q80UT7 Q80UT7_MOUSE | 60S ribosomal protein L7a (Fragment) OS=Mus musculus<br>OX=10090 GN=Rpl7a PE=2 SV=1                                              | MOUSE | 18 |
| 508 | 26.88 | 36.33 | 69.01 | 59.72 | sp P08752 GNAI2_MOUSE  | Guanine nucleotide-binding protein G(i) subunit alpha-2<br>OS=Mus musculus OX=10090 GN=Gnai2 PE=1 SV=5                           | MOUSE | 18 |
| 509 | 26.87 | 26.94 | 44.17 | 41.49 | tr B2RS41 B2RS41_MOUSE | Succinate-semialdehyde dehydrogenase OS=Mus musculus<br>OX=10090 GN=Aldh5a1 PE=1 SV=1                                            | MOUSE | 14 |
| 510 | 26.77 | 60.23 | 66.44 | 64.43 | tr Q545A2 Q545A2_MOUSE | ADP/ATP translocase OS=Mus musculus OX=10090<br>GN=Slc25a5 PE=1 SV=1                                                             | MOUSE | 48 |
| 511 | 26.74 | 26.79 | 48.45 | 48.19 | sp Q8BVQ5 PPME1_MOUSE  | Protein phosphatase methylesterase 1 OS=Mus musculus<br>OX=10090 GN=Ppme1 PE=1 SV=5                                              | MOUSE | 15 |
| 512 | 26.73 | 26.83 | 50.11 | 38.53 | sp Q99JY0 ECHB_MOUSE   | Trifunctional enzyme subunit beta, mitochondrial OS=Mus<br>musculus OX=10090 GN=Hadhb PE=1 SV=1                                  | MOUSE | 15 |
| 513 | 26.59 | 27.73 | 34.34 | 24.76 | sp Q810A7 DDX42_MOUSE  | ATP-dependent RNA helicase DDX42 OS=Mus musculus<br>OX=10090 GN=Ddx42 PE=1 SV=3                                                  | MOUSE | 15 |
| 514 | 26.59 | 26.69 | 33.66 | 22.63 | tr G3XA17 G3XA17_MOUSE | Eukaryotic translation initiation factor 4 gamma 2 OS=Mus<br>musculus OX=10090 GN=Eif4g2 PE=1 SV=1                               | MOUSE | 14 |
| 515 | 26.58 | 26.8  | 51.52 | 39.53 | sp Q9CWJ9 PUR9_MOUSE   | Bifunctional purine biosynthesis protein ATIC OS=Mus<br>musculus OX=10090 GN=Atic PE=1 SV=2                                      | MOUSE | 16 |
| 516 | 26.58 | 26.66 | 43.97 | 39.70 | sp Q9DBF1 AL7A1_MOUSE  | Alpha-aminoadipic semialdehyde dehydrogenase OS=Mus<br>musculus OX=10090 GN=Aldh7a1 PE=1 SV=4                                    | MOUSE | 15 |
| 517 | 26.55 | 26.86 | 18.66 | 7.00  | tr Z4YL78 Z4YL78_MOUSE | Cytoskeleton-associated protein 5 OS=Mus musculus<br>OX=10090 GN=Ckap5 PE=1 SV=1                                                 | MOUSE | 12 |
| 518 | 26.53 | 26.61 | 58.59 | 49.86 | sp Q99LC3 NDUAA_MOUSE  | NADH dehydrogenase [ubiquinone] 1 alpha subcomplex<br>subunit 10, mitochondrial OS=Mus musculus OX=10090<br>GN=Ndufa10 PE=1 SV=1 | MOUSE | 13 |
| 519 | 26.48 | 26.53 | 57.46 | 39.47 | tr Q3UJN2 Q3UJN2_MOUSE | RuvB-like helicase OS=Mus musculus OX=10090<br>GN=Ruvbl1 PE=2 SV=1                                                               | MOUSE | 15 |
| 520 | 26.44 | 28.77 | 37.24 | 32.99 | sp O08539 BIN1_MOUSE   | Myc box-dependent-interacting protein 1 OS=Mus<br>musculus OX=10090 GN=Bin1 PE=1 SV=1                                            | MOUSE | 14 |
| 521 | 26.41 | 26.46 | 47.69 | 47.22 | tr Q3ULW0 Q3ULW0_MOUSE | GTP-binding nuclear protein Ran OS=Mus musculus<br>OX=10090 GN=Ran PE=2 SV=1                                                     | MOUSE | 16 |
| 522 | 26.39 | 26.4  | 42.76 | 38.28 | tr Q3UR55 Q3UR55_MOUSE | Sodium/potassium-transporting ATPase subunit beta<br>OS=Mus musculus OX=10090 GN=Atp1b2 PE=1 SV=1                                | MOUSE | 18 |



|     |       |       |       |       |                         |                                                                                                                                      |       |    |
|-----|-------|-------|-------|-------|-------------------------|--------------------------------------------------------------------------------------------------------------------------------------|-------|----|
| 523 | 26.37 | 26.6  | 25.55 | 14.26 | tr Q7TSZ3 Q7TSZ3_MOUSE  | Leucyl-tRNA synthetase OS=Mus musculus OX=10090 GN=Lars PE=2 SV=1                                                                    | MOUSE | 12 |
| 524 | 26.37 | 26.38 | 27.96 | 23.43 | sp Q8BG39 SV2B_MOUSE    | Synaptic vesicle glycoprotein 2B OS=Mus musculus OX=10090 GN=Sv2b PE=1 SV=1                                                          | MOUSE | 14 |
| 525 | 26.34 | 26.39 | 39.74 | 32.40 | tr Q3UXP2 Q3UXP2_MOUSE  | RuvB-like helicase OS=Mus musculus OX=10090 GN=Ruvb12 PE=2 SV=1                                                                      | MOUSE | 14 |
| 526 | 26.25 | 26.32 | 77.74 | 67.81 | sp P60487 PLPP_MOUSE    | Chronophin OS=Mus musculus OX=10090 GN=Pdpx PE=1 SV=1                                                                                | MOUSE | 13 |
| 527 | 26.21 | 34.2  | 73.58 | 64.63 | tr A2A5N2 A2A5N2_MOUSE  | Tyrosine 3-monooxygenase/tryptophan 5-monooxygenase activation protein, beta polypeptide OS=Mus musculus OX=10090 GN=Ywhab PE=2 SV=1 | MOUSE | 18 |
| 528 | 26.04 | 26.17 | 34.24 | 22.62 | sp Q8BG51-2 MIRO1_MOUSE | Isoform 2 of Mitochondrial Rho GTPase 1 OS=Mus musculus OX=10090 GN=Rhot1                                                            | MOUSE | 12 |
| 529 | 26.03 | 26.12 | 19.39 | 12.45 | sp Q5SQX6 CYFP2_MOUSE   | Cytoplasmic FMR1-interacting protein 2 OS=Mus musculus OX=10090 GN=Cyfp2 PE=1 SV=2                                                   | MOUSE | 14 |
| 530 | 25.96 | 31.08 | 65.77 | 64.15 | sp P57722 PCBP3_MOUSE   | Poly(rC)-binding protein 3 OS=Mus musculus OX=10090 GN=Pcbp3 PE=1 SV=3                                                               | MOUSE | 20 |
| 531 | 25.92 | 25.94 | 71.27 | 67.96 | tr Q3U344 Q3U344_MOUSE  | Uncharacterized protein OS=Mus musculus OX=10090 GN=Arf3 PE=2 SV=1                                                                   | MOUSE | 14 |
| 532 | 25.88 | 26.18 | 34.84 | 20.66 | tr Q3UZI3 Q3UZI3_MOUSE  | Staphylococcal nuclease domain-containing protein OS=Mus musculus OX=10090 GN=Snd1 PE=2 SV=1                                         | MOUSE | 15 |
| 533 | 25.86 | 26.75 | 43.76 | 20.88 | sp O55029 COPB2_MOUSE   | Coatomer subunit beta' OS=Mus musculus OX=10090 GN=Copb2 PE=1 SV=2                                                                   | MOUSE | 12 |
| 534 | 25.81 | 25.91 | 36.36 | 26.06 | sp Q9D0I9 SYRC_MOUSE    | Arginine--tRNA ligase, cytoplasmic OS=Mus musculus OX=10090 GN=Rars1 PE=1 SV=2                                                       | MOUSE | 15 |
| 535 | 25.79 | 30.45 | 45.51 | 38.32 | sp P46660 AINX_MOUSE    | Alpha-internexin OS=Mus musculus OX=10090 GN=Ina PE=1 SV=3                                                                           | MOUSE | 18 |
| 536 | 25.76 | 25.8  | 31.33 | 30.37 | tr Q8CFQ9 Q8CFQ9_MOUSE  | Fusion, derived from t(1216) malignant liposarcoma (Human) OS=Mus musculus OX=10090 GN=Fus PE=1 SV=1                                 | MOUSE | 15 |
| 537 | 25.74 | 25.77 | 69.70 | 69.70 | sp Q61171 PRDX2_MOUSE   | Peroxiredoxin-2 OS=Mus musculus OX=10090 GN=Prdx2 PE=1 SV=3                                                                          | MOUSE | 15 |
| 538 | 25.56 | 25.58 | 64.79 | 61.50 | tr Q3TF25 Q3TF25_MOUSE  | ATP synthase peripheral stalk subunit OSCP OS=Mus musculus OX=10090 GN=Atp5o PE=2 SV=1                                               | MOUSE | 15 |

|     |       |       |       |       |                                |                                                                                                               |       |    |
|-----|-------|-------|-------|-------|--------------------------------|---------------------------------------------------------------------------------------------------------------|-------|----|
| 539 | 25.5  | 25.65 | 65.30 | 53.31 | tr Q5M8R8 Q5M8R8_MOUSE         | 60S acidic ribosomal protein P0 OS=Mus musculus<br>OX=10090 GN=Rplp0 PE=2 SV=1                                | MOUSE | 16 |
| 540 | 25.49 | 25.54 | 64.50 | 60.36 | tr A2RSV8 A2RSV8_MOUSE         | Cytochrome c oxidase subunit 4 OS=Mus musculus<br>OX=10090 GN=Cox4i1 PE=1 SV=1                                | MOUSE | 15 |
| 541 | 25.46 | 25.87 | 29.75 | 17.05 | sp Q569Z5 DDX46_MOUSE          | Probable ATP-dependent RNA helicase DDX46 OS=Mus musculus<br>OX=10090 GN=Ddx46 PE=1 SV=2                      | MOUSE | 16 |
| 542 | 25.38 | 25.49 | 40.90 | 21.69 | tr A0A0R4IZY0 A0A0R4IZY0_MOUSE | Thimet oligopeptidase OS=Mus musculus OX=10090<br>GN=Thop1 PE=1 SV=1                                          | MOUSE | 12 |
| 543 | 25.38 | 25.42 | 50.14 | 50.14 | sp Q9D051 ODPB_MOUSE           | Pyruvate dehydrogenase E1 component subunit beta, mitochondrial OS=Mus musculus OX=10090 GN=Pdhb<br>PE=1 SV=1 | MOUSE | 16 |
| 544 | 25.29 | 25.36 | 45.69 | 42.64 | tr Q5SW83 Q5SW83_MOUSE         | Uncharacterized protein OS=Mus musculus OX=10090<br>GN=Actr2 PE=1 SV=1                                        | MOUSE | 15 |
| 545 | 25.26 | 25.33 | 29.92 | 28.03 | tr Q3U9V1 Q3U9V1_MOUSE         | TPR_REGION domain-containing protein OS=Mus musculus<br>OX=10090 GN=Stt13 PE=2 SV=1                           | MOUSE | 13 |
| 546 | 25.24 | 25.33 | 54.42 | 44.73 | sp P51863 VA0D1_MOUSE          | V-type proton ATPase subunit d 1 OS=Mus musculus<br>OX=10090 GN=Atp6v0d1 PE=1 SV=2                            | MOUSE | 14 |
| 547 | 25.22 | 25.29 | 36.97 | 34.74 | tr Q3UB90 Q3UB90_MOUSE         | Uncharacterized protein OS=Mus musculus OX=10090<br>GN=Rpl3 PE=2 SV=1                                         | MOUSE | 14 |
| 548 | 25.19 | 25.27 | 38.96 | 34.17 | tr Q3UXT6 Q3UXT6_MOUSE         | Uncharacterized protein (Fragment) OS=Mus musculus<br>OX=10090 GN=Rbm39 PE=2 SV=1                             | MOUSE | 14 |
| 549 | 25.14 | 25.32 | 39.23 | 17.80 | sp Q80TZ3 AUX1_MOUSE           | Putative tyrosine-protein phosphatase auxilin OS=Mus musculus<br>OX=10090 GN=Dnajc6 PE=1 SV=2                 | MOUSE | 14 |
| 550 | 25.09 | 25.16 | 45.42 | 38.60 | sp Q3UKJ7 SMU1_MOUSE           | WD40 repeat-containing protein SMU1 OS=Mus musculus<br>OX=10090 GN=Smu1 PE=2 SV=2                             | MOUSE | 14 |
| 551 | 25.05 | 25.57 | 35.81 | 28.88 | sp Q8VEH5 EPMIP_MOUSE          | EPM2A-interacting protein 1 OS=Mus musculus OX=10090<br>GN=Epm2aip1 PE=1 SV=1                                 | MOUSE | 13 |
| 552 | 25.03 | 25.51 | 48.73 | 43.04 | tr Q5U415 Q5U415_MOUSE         | Aldo-keto reductase family 1, member B3 (Aldose reductase) OS=Mus musculus<br>OX=10090 GN=Akr1b3 PE=2 SV=1    | MOUSE | 13 |
| 553 | 25    | 25.02 | 41.27 | 33.47 | tr Q3MIA8 Q3MIA8_MOUSE         | COP9 signalosome complex subunit 1 OS=Mus musculus<br>OX=10090 GN=Gps1 PE=1 SV=1                              | MOUSE | 15 |
| 554 | 24.92 | 25.04 | 48.94 | 39.62 | tr Q3UIJ2 Q3UIJ2_MOUSE         | Protein-synthesizing GTPase OS=Mus musculus OX=10090<br>GN=Elf2s3x PE=2 SV=1                                  | MOUSE | 14 |

|     |       |       |       |       |                                |                                                                                                    |       |    |
|-----|-------|-------|-------|-------|--------------------------------|----------------------------------------------------------------------------------------------------|-------|----|
| 555 | 24.9  | 25.11 | 48.98 | 37.99 | sp Q99L88 SNTB1_MOUSE          | Beta-1-syntrophin OS=Mus musculus OX=10090 GN=Sntb1 PE=1 SV=4                                      | MOUSE | 14 |
| 556 | 24.89 | 25.1  | 24.43 | 12.91 | tr F8WHU5 F8WHU5_MOUSE         | Sister chromatid cohesion protein PDS5 homolog B OS=Mus musculus OX=10090 GN=Pds5b PE=1 SV=1       | MOUSE | 14 |
| 557 | 24.87 | 24.91 | 74.53 | 71.91 | tr E9PZF0 E9PZF0_MOUSE         | Nucleoside diphosphate kinase OS=Mus musculus OX=10090 GN=Gm20390 PE=3 SV=1                        | MOUSE | 15 |
| 558 | 24.81 | 24.89 | 48.47 | 43.45 | tr Q3UHH5 Q3UHH5_MOUSE         | Uncharacterized protein OS=Mus musculus OX=10090 GN=Gnaq PE=1 SV=1                                 | MOUSE | 13 |
| 559 | 24.81 | 24.82 | 41.03 | 37.30 | sp Q80VD1 FA98B_MOUSE          | Protein FAM98B OS=Mus musculus OX=10090 GN=Fam98b PE=1 SV=1                                        | MOUSE | 13 |
| 560 | 24.75 | 24.88 | 47.82 | 31.31 | tr Q3UJ34 Q3UJ34_MOUSE         | Argininosuccinate synthase OS=Mus musculus OX=10090 GN=Ass1 PE=1 SV=1                              | MOUSE | 12 |
| 561 | 24.73 | 24.8  | 43.91 | 35.93 | tr Q58E59 Q58E59_MOUSE         | Splicing factor 3a, subunit 3 OS=Mus musculus OX=10090 GN=Sf3a3 PE=1 SV=1                          | MOUSE | 15 |
| 562 | 24.67 | 40.09 | 72.79 | 69.11 | sp P62631 EF1A2_MOUSE          | Elongation factor 1-alpha 2 OS=Mus musculus OX=10090 GN=Eef1a2 PE=1 SV=1                           | MOUSE | 27 |
| 563 | 24.65 | 24.67 | 22.22 | 18.42 | sp P29974 CNGA1_MOUSE          | cGMP-gated cation channel alpha-1 OS=Mus musculus OX=10090 GN=Cnga1 PE=2 SV=2                      | MOUSE | 12 |
| 564 | 24.64 | 24.66 | 59.64 | 48.33 | tr Q14AQ1 Q14AQ1_MOUSE         | Proteasome (Prosome, macropain) 26S subunit, ATPase, 6 OS=Mus musculus OX=10090 GN=Psmc6 PE=1 SV=1 | MOUSE | 13 |
| 565 | 24.61 | 24.63 | 26.60 | 14.85 | tr F8VQC7 F8VQC7_MOUSE         | Kinectin OS=Mus musculus OX=10090 GN=Ktn1 PE=1 SV=1                                                | MOUSE | 12 |
| 566 | 24.6  | 26.63 | 56.34 | 51.76 | tr Q5EBQ0 Q5EBQ0_MOUSE         | Voltage-dependent anion-selective channel protein 3 OS=Mus musculus OX=10090 GN=Vdac3 PE=2 SV=1    | MOUSE | 13 |
| 567 | 24.58 | 24.62 | 49.27 | 43.80 | tr Q8C2Q8 Q8C2Q8_MOUSE         | ATP synthase subunit gamma OS=Mus musculus OX=10090 GN=Atp5c1 PE=1 SV=1                            | MOUSE | 13 |
| 568 | 24.58 | 24.6  | 60.13 | 53.82 | tr Q3UWX7 Q3UWX7_MOUSE         | Uncharacterized protein OS=Mus musculus OX=10090 GN=Tcea1 PE=2 SV=1                                | MOUSE | 17 |
| 569 | 24.54 | 25    | 15.49 | 9.81  | tr H3BLH0 H3BLH0_MOUSE         | Probable global transcription activator SNF2L2 OS=Mus musculus OX=10090 GN=Smarca2 PE=1 SV=1       | MOUSE | 15 |
| 570 | 24.47 | 26.69 | 55.53 | 45.67 | tr A0A1S6GWH1 A0A1S6GWH1_MOUSE | AAA domain-containing protein OS=Mus musculus OX=10090 GN=Psmc5 PE=2 SV=1                          | MOUSE | 15 |

|     |       |       |       |       |                         |                                                                                                        |       |    |
|-----|-------|-------|-------|-------|-------------------------|--------------------------------------------------------------------------------------------------------|-------|----|
| 571 | 24.4  | 24.47 | 47.87 | 36.97 | tr B2RT97 B2RT97_MOUSE  | 26S proteasome non-ATPase regulatory subunit 13 OS=Mus musculus OX=10090 GN=Psmc13 PE=1 SV=1           | MOUSE | 13 |
| 572 | 24.39 | 24.47 | 34.88 | 24.55 | sp Q9R190 MTA2_MOUSE    | Metastasis-associated protein MTA2 OS=Mus musculus OX=10090 GN=Mta2 PE=1 SV=1                          | MOUSE | 15 |
| 573 | 24.38 | 24.61 | 30.24 | 22.90 | tr S4R1M2 S4R1M2_MOUSE  | Scaffold attachment factor B1 OS=Mus musculus OX=10090 GN=Safrb PE=1 SV=1                              | MOUSE | 13 |
| 574 | 24.33 | 24.38 | 59.50 | 57.32 | sp Q91V61 SFXN3_MOUSE   | Sideroflexin-3 OS=Mus musculus OX=10090 GN=Sfxn3 PE=1 SV=1                                             | MOUSE | 13 |
| 575 | 24.3  | 28.45 | 81.86 | 77.21 | tr Q50HX4 Q50HX4_MOUSE  | Ras-related protein Rab-14 OS=Mus musculus OX=10090 GN=Rab14 PE=1 SV=1                                 | MOUSE | 16 |
| 576 | 24.3  | 24.33 | 58.98 | 48.81 | tr B2CY77 B2CY77_MOUSE  | Laminin receptor (Fragment) OS=Mus musculus OX=10090 GN=Rpsa PE=2 SV=1                                 | MOUSE | 14 |
| 577 | 24.27 | 29.54 | 52.96 | 51.71 | sp P42669 PURA_MOUSE    | Transcriptional activator protein Pur-alpha OS=Mus musculus OX=10090 GN=Pura PE=1 SV=1                 | MOUSE | 20 |
| 578 | 24.25 | 24.26 | 65.45 | 59.47 | tr Q8BUM1 Q8BUM1_MOUSE  | TAR DNA-binding protein 43 OS=Mus musculus OX=10090 GN=Tardbp PE=2 SV=1                                | MOUSE | 13 |
| 579 | 24.23 | 24.26 | 71.76 | 59.14 | sp Q9DCN2 NB5R3_MOUSE   | NADH-cytochrome b5 reductase 3 OS=Mus musculus OX=10090 GN=Cyb5r3 PE=1 SV=3                            | MOUSE | 13 |
| 580 | 24.22 | 24.33 | 27.79 | 17.99 | sp Q6A0A9 F120A_MOUSE   | Constitutive coactivator of PPAR-gamma-like protein 1 OS=Mus musculus OX=10090 GN=FAM120A PE=1 SV=2    | MOUSE | 13 |
| 581 | 24.19 | 24.25 | 61.88 | 51.76 | sp Q60972 RBBP4_MOUSE   | Histone-binding protein RBBP4 OS=Mus musculus OX=10090 GN=Rbbp4 PE=1 SV=5                              | MOUSE | 13 |
| 582 | 24.16 | 24.2  | 66.97 | 60.06 | sp Q99LC5 ETFA_MOUSE    | Electron transfer flavoprotein subunit alpha, mitochondrial OS=Mus musculus OX=10090 GN=Etfa PE=1 SV=2 | MOUSE | 12 |
| 583 | 24.15 | 24.25 | 22.69 | 12.30 | sp Q8CH18 CCAR1_MOUSE   | Cell division cycle and apoptosis regulator protein 1 OS=Mus musculus OX=10090 GN=Ccar1 PE=1 SV=1      | MOUSE | 11 |
| 584 | 24.14 | 24.73 | 38.81 | 35.38 | tr Q3UQ71 Q3UQ71_MOUSE  | AB hydrolase-1 domain-containing protein OS=Mus musculus OX=10090 GN=Ephx2 PE=2 SV=1                   | MOUSE | 15 |
| 585 | 24.09 | 24.26 | 45.32 | 45.32 | sp Q8R5M8-4 CADM1_MOUSE | Isoform 4 of Cell adhesion molecule 1 OS=Mus musculus OX=10090 GN=Cadm1                                | MOUSE | 18 |
| 586 | 24.08 | 24.26 | 63.55 | 39.50 | sp Q8CIN4 PAK2_MOUSE    | Serine/threonine-protein kinase PAK 2 OS=Mus musculus OX=10090 GN=Pak2 PE=1 SV=1                       | MOUSE | 13 |

|     |       |       |       |       |                                |                                                                                                           |       |    |
|-----|-------|-------|-------|-------|--------------------------------|-----------------------------------------------------------------------------------------------------------|-------|----|
| 587 | 24.05 | 24.1  | 29.63 | 21.21 | sp Q9Z0E0-2 NCDN_MOUSE         | Isoform 2 of Neurochondrin OS=Mus musculus OX=10090 GN=Ncdn                                               | MOUSE | 13 |
| 588 | 24.04 | 24.1  | 41.48 | 32.21 | sp Q3V3N7 BBS1_MOUSE           | Bardet-Biedl syndrome 1 protein homolog OS=Mus musculus OX=10090 GN=Bbs1 PE=1 SV=1                        | MOUSE | 13 |
| 589 | 24.04 | 24.05 | 47.60 | 47.16 | tr Q3U125 Q3U125_MOUSE         | Peroxiredoxin-like 2 activated in M-CSF stimulated monocytes OS=Mus musculus OX=10090 GN=Prxl2a PE=1 SV=1 | MOUSE | 13 |
| 590 | 24.03 | 24.1  | 37.11 | 29.47 | sp Q7TNV0 DEK_MOUSE            | Protein DEK OS=Mus musculus OX=10090 GN=Dek PE=1 SV=1                                                     | MOUSE | 13 |
| 591 | 24    | 24    | 63.33 | 63.33 | tr Q3V299 Q3V299_MOUSE         | Protein unc-119 homolog A OS=Mus musculus OX=10090 GN=Unc119 PE=1 SV=1                                    | MOUSE | 12 |
| 592 | 23.88 | 23.92 | 77.52 | 77.06 | tr Q99KF5 Q99KF5_MOUSE         | Hypoxanthine phosphoribosyltransferase OS=Mus musculus OX=10090 GN=Hprt PE=2 SV=1                         | MOUSE | 14 |
| 593 | 23.87 | 23.91 | 40.36 | 35.22 | sp P18572 BASI_MOUSE           | Basigin OS=Mus musculus OX=10090 GN=Bsg PE=1 SV=2                                                         | MOUSE | 14 |
| 594 | 23.86 | 34.08 | 59.05 | 55.71 | sp P30681 HMGB2_MOUSE          | High mobility group protein B2 OS=Mus musculus OX=10090 GN=Hmgb2 PE=1 SV=3                                | MOUSE | 26 |
| 595 | 23.82 | 24.04 | 63.38 | 46.71 | tr Q3UM23 Q3UM23_MOUSE         | Ribonuclease inhibitor OS=Mus musculus OX=10090 GN=Rnh1 PE=2 SV=1                                         | MOUSE | 13 |
| 596 | 23.8  | 23.94 | 33.98 | 32.81 | sp Q3UHL1 CAMKV_MOUSE          | CaM kinase-like vesicle-associated protein OS=Mus musculus OX=10090 GN=Camkv PE=1 SV=2                    | MOUSE | 14 |
| 597 | 23.8  | 23.84 | 63.91 | 49.11 | sp Q9DAR7 DCPS_MOUSE           | m7GpppX diphosphatase OS=Mus musculus OX=10090 GN=Dcps PE=1 SV=1                                          | MOUSE | 12 |
| 598 | 23.78 | 23.78 | 64.57 | 64.57 | sp Q9R0P9 UCHL1_MOUSE          | Ubiquitin carboxyl-terminal hydrolase isozyme L1 OS=Mus musculus OX=10090 GN=Uchl1 PE=1 SV=1              | MOUSE | 14 |
| 599 | 23.72 | 23.93 | 23.68 | 16.63 | sp O88508 DNM3A_MOUSE          | DNA (cytosine-5)-methyltransferase 3A OS=Mus musculus OX=10090 GN=Dnmt3a PE=1 SV=2                        | MOUSE | 12 |
| 600 | 23.69 | 23.98 | 40.94 | 29.25 | sp P14685 PSMD3_MOUSE          | 26S proteasome non-ATPase regulatory subunit 3 OS=Mus musculus OX=10090 GN=Psm3 PE=1 SV=3                 | MOUSE | 15 |
| 601 | 23.68 | 23.71 | 65.41 | 53.77 | tr A0A498WGD8 A0A498WGD8_MOUSE | Thioredoxin-like protein 1 OS=Mus musculus OX=10090 GN=Txnl1 PE=1 SV=1                                    | MOUSE | 13 |
| 602 | 23.68 | 23.71 | 42.25 | 41.83 | tr Q80XR5 Q80XR5_MOUSE         | U2 snRNP auxiliary factor large subunit OS=Mus musculus OX=10090 GN=U2af2 PE=1 SV=1                       | MOUSE | 17 |

|     |       |       |       |       |                                |                                                                                                                |       |    |
|-----|-------|-------|-------|-------|--------------------------------|----------------------------------------------------------------------------------------------------------------|-------|----|
| 603 | 23.67 | 23.71 | 44.16 | 43.02 | sp P32958 ROM1_MOUSE           | Rod outer segment membrane protein 1 OS=Mus musculus<br>OX=10090 GN=Rom1 PE=1 SV=1                             | MOUSE | 18 |
| 604 | 23.58 | 23.89 | 55.41 | 44.32 | tr Q14BL1 Q14BL1_MOUSE         | NAD(+) kinase (Fragment) OS=Mus musculus OX=10090<br>GN=Nadk2 PE=2 SV=2                                        | MOUSE | 13 |
| 605 | 23.58 | 23.69 | 51.31 | 37.77 | tr Q91WS8 Q91WS8_MOUSE         | Medium-chain specific acyl-CoA dehydrogenase,<br>mitochondrial OS=Mus musculus OX=10090 GN=Acadm<br>PE=2 SV=1  | MOUSE | 12 |
| 606 | 23.55 | 23.68 | 11.73 | 6.99  | sp Q8BTI8 SRRM2_MOUSE          | Serine/arginine repetitive matrix protein 2 OS=Mus<br>musculus OX=10090 GN=Srrm2 PE=1 SV=3                     | MOUSE | 12 |
| 607 | 23.55 | 23.59 | 34.14 | 31.16 | sp Q6DFW4 NOP58_MOUSE          | Nucleolar protein 58 OS=Mus musculus OX=10090<br>GN=Nop58 PE=1 SV=1                                            | MOUSE | 12 |
| 608 | 23.52 | 23.66 | 60.29 | 52.21 | sp P84244 H33_MOUSE            | Histone H3.3 OS=Mus musculus OX=10090 GN=H3-3a PE=1<br>SV=2                                                    | MOUSE | 27 |
| 609 | 23.49 | 23.57 | 61.85 | 53.23 | tr A0A0R4J195 A0A0R4J195_MOUSE | Regulation of nuclear pre-mRNA domain-containing<br>protein 1B OS=Mus musculus OX=10090 GN=Rprd1b PE=1<br>SV=1 | MOUSE | 13 |
| 610 | 23.41 | 23.52 | 41.62 | 39.64 | sp Q5SRX1 TM1L2_MOUSE          | TOM1-like protein 2 OS=Mus musculus OX=10090<br>GN=Tom1l2 PE=1 SV=1                                            | MOUSE | 13 |
| 611 | 23.4  | 23.62 | 50.38 | 34.81 | sp Q8BK67 RCC2_MOUSE           | Protein RCC2 OS=Mus musculus OX=10090 GN=Rcc2 PE=1<br>SV=1                                                     | MOUSE | 13 |
| 612 | 23.38 | 23.46 | 39.12 | 38.68 | sp Q8R016 BLMH_MOUSE           | Bleomycin hydrolase OS=Mus musculus OX=10090<br>GN=Blmh PE=1 SV=1                                              | MOUSE | 12 |
| 613 | 23.34 | 23.6  | 32.77 | 25.42 | sp Q8BML9 SYQ_MOUSE            | Glutamine--tRNA ligase OS=Mus musculus OX=10090<br>GN=Qars1 PE=1 SV=1                                          | MOUSE | 14 |
| 614 | 23.33 | 23.73 | 11.70 | 5.82  | tr E9Q3Y4 E9Q3Y4_MOUSE         | Lipopolysaccharide-responsive and beige-like anchor<br>protein OS=Mus musculus OX=10090 GN=Lrba PE=1 SV=1      | MOUSE | 12 |
| 615 | 23.31 | 23.47 | 40.75 | 27.10 | sp Q9QXY6 EHD3_MOUSE           | EH domain-containing protein 3 OS=Mus musculus<br>OX=10090 GN=Ehd3 PE=1 SV=2                                   | MOUSE | 15 |
| 616 | 23.29 | 23.67 | 53.82 | 27.83 | tr D3Z0G8 D3Z0G8_MOUSE         | MAGUK p55 subfamily member 4 OS=Mus musculus<br>OX=10090 GN=Mpp4 PE=1 SV=2                                     | MOUSE | 12 |
| 617 | 23.27 | 23.31 | 34.54 | 30.59 | tr Q545P0 Q545P0_MOUSE         | Sodium/potassium-transporting ATPase subunit beta<br>OS=Mus musculus OX=10090 GN=Atp1b1 PE=1 SV=1              | MOUSE | 13 |

|     |       |       |       |       |                                |                                                                                                           |       |    |
|-----|-------|-------|-------|-------|--------------------------------|-----------------------------------------------------------------------------------------------------------|-------|----|
| 618 | 23.26 | 23.44 | 55.88 | 50.74 | tr Q923G3 Q923G3_MOUSE         | F-actin-capping protein subunit beta OS=Mus musculus OX=10090 GN=Capzb PE=1 SV=1                          | MOUSE | 15 |
| 619 | 23.24 | 23.27 | 43.94 | 40.28 | tr Q542R8 Q542R8_MOUSE         | Uncharacterized protein OS=Mus musculus OX=10090 GN=Gnaz PE=1 SV=1                                        | MOUSE | 13 |
| 620 | 23.23 | 23.31 | 55.80 | 54.02 | sp Q9Z1L4 XLR51_MOUSE          | Retinoschisin OS=Mus musculus OX=10090 GN=Rs1 PE=1 SV=1                                                   | MOUSE | 15 |
| 621 | 23.23 | 23.29 | 49.87 | 47.33 | sp P70404 IDHG1_MOUSE          | Isocitrate dehydrogenase [NAD] subunit gamma 1, mitochondrial OS=Mus musculus OX=10090 GN=Idh3g PE=1 SV=1 | MOUSE | 15 |
| 622 | 23.2  | 23.28 | 55.32 | 50.59 | tr Q3V100 Q3V100_MOUSE         | Mannose-6-phosphate isomerase OS=Mus musculus OX=10090 GN=Mpi PE=1 SV=1                                   | MOUSE | 12 |
| 623 | 23.07 | 23.09 | 62.84 | 62.84 | tr Q9DCC5 Q9DCC5_MOUSE         | Cbx3 protein OS=Mus musculus OX=10090 GN=Cbx3 PE=1 SV=1                                                   | MOUSE | 12 |
| 624 | 23.04 | 23.21 | 38.94 | 35.48 | sp Q8K1J6 TRNT1_MOUSE          | CCA tRNA nucleotidyltransferase 1, mitochondrial OS=Mus musculus OX=10090 GN=Trnt1 PE=1 SV=1              | MOUSE | 13 |
| 625 | 23.02 | 23.05 | 68.30 | 53.13 | sp P48774 GSTM5_MOUSE          | Glutathione S-transferase Mu 5 OS=Mus musculus OX=10090 GN=Gstm5 PE=1 SV=1                                | MOUSE | 12 |
| 626 | 23.01 | 23.25 | 67.16 | 52.77 | tr Q5ND42 Q5ND42_MOUSE         | Uncharacterized protein OS=Mus musculus OX=10090 GN=Pitpna PE=1 SV=1                                      | MOUSE | 14 |
| 627 | 22.94 | 23.2  | 33.52 | 23.72 | tr A0PJL3 A0PJL3_MOUSE         | NAD(+) hydrolase SARM1 (Fragment) OS=Mus musculus OX=10090 GN=Sarm1 PE=2 SV=1                             | MOUSE | 13 |
| 628 | 22.89 | 22.94 | 59.17 | 59.17 | tr Q78ZJ8 Q78ZJ8_MOUSE         | RAB11B protein OS=Mus musculus OX=10090 GN=Rab11b PE=1 SV=1                                               | MOUSE | 13 |
| 629 | 22.87 | 23.06 | 25.74 | 11.36 | tr Q3UHE7 Q3UHE7_MOUSE         | Uncharacterized protein OS=Mus musculus OX=10090 GN=Kif21a PE=2 SV=1                                      | MOUSE | 12 |
| 630 | 22.87 | 23.03 | 40.48 | 29.56 | sp P14576 SRP54_MOUSE          | Signal recognition particle 54 kDa protein OS=Mus musculus OX=10090 GN=Srp54 PE=1 SV=2                    | MOUSE | 11 |
| 631 | 22.87 | 22.96 | 22.39 | 22.22 | tr A0A1B0GRU0 A0A1B0GRU0_MOUSE | Vesicular glutamate transporter 1 OS=Mus musculus OX=10090 GN=Slc17a7 PE=1 SV=1                           | MOUSE | 12 |
| 632 | 22.83 | 22.98 | 19.12 | 13.87 | tr Q80X48 Q80X48_MOUSE         | Nucleoporin 155 OS=Mus musculus OX=10090 GN=Nup155 PE=2 SV=1                                              | MOUSE | 12 |
| 633 | 22.81 | 22.93 | 50.38 | 40.15 | tr Q61177 Q61177_MOUSE         | Casein kinase II alpha subunit OS=Mus musculus OX=10090 GN=Csnk2a1 PE=1 SV=1                              | MOUSE | 15 |

|     |       |       |       |       |                                |                                                                                                 |       |    |
|-----|-------|-------|-------|-------|--------------------------------|-------------------------------------------------------------------------------------------------|-------|----|
| 634 | 22.79 | 22.85 | 42.37 | 35.84 | tr D3YTT4 D3YTT4_MOUSE         | Isobutyryl-CoA dehydrogenase, mitochondrial OS=Mus musculus OX=10090 GN=Acad8 PE=1 SV=1         | MOUSE | 12 |
| 635 | 22.79 | 22.85 | 52.42 | 45.70 | tr Q3UVN5 Q3UVN5_MOUSE         | NSFL1 cofactor p47 OS=Mus musculus OX=10090 GN=Nsfl1c PE=2 SV=1                                 | MOUSE | 15 |
| 636 | 22.72 | 32.38 | 29.69 | 21.28 | tr Q8CHF1 Q8CHF1_MOUSE         | Kinesin-like protein (Fragment) OS=Mus musculus OX=10090 GN=mKIAA0531 PE=2 SV=1                 | MOUSE | 16 |
| 637 | 22.71 | 22.82 | 21.77 | 15.67 | sp Q569Z6 TR150_MOUSE          | Thyroid hormone receptor-associated protein 3 OS=Mus musculus OX=10090 GN=Thrap3 PE=1 SV=1      | MOUSE | 12 |
| 638 | 22.69 | 22.76 | 65.98 | 59.75 | sp Q8BVI4 DHPR_MOUSE           | Dihydropteridine reductase OS=Mus musculus OX=10090 GN=Qdpr PE=1 SV=2                           | MOUSE | 11 |
| 639 | 22.69 | 22.74 | 51.32 | 46.93 | tr Q545E6 Q545E6_MOUSE         | Component 3 of promoter of RISC OS=Mus musculus OX=10090 GN=Tsn PE=1 SV=1                       | MOUSE | 12 |
| 640 | 22.67 | 22.73 | 41.55 | 39.53 | tr Q3UCH0 Q3UCH0_MOUSE         | 60S ribosomal protein L6 OS=Mus musculus OX=10090 GN=Rpl6 PE=1 SV=1                             | MOUSE | 13 |
| 641 | 22.65 | 22.86 | 36.52 | 32.75 | sp P97300 NPTN_MOUSE           | Neuroplastin OS=Mus musculus OX=10090 GN=Nptn PE=1 SV=3                                         | MOUSE | 13 |
| 642 | 22.64 | 38.65 | 11.63 | 6.02  | tr W6PPR4 W6PPR4_MOUSE         | 480-kDa ankyrinG OS=Mus musculus OX=10090 GN=Ank3 PE=4 SV=1                                     | MOUSE | 22 |
| 643 | 22.61 | 22.68 | 45.45 | 40.40 | tr Q58EU6 Q58EU6_MOUSE         | Ribosomal protein L5 OS=Mus musculus OX=10090 GN=Rpl5 PE=1 SV=1                                 | MOUSE | 13 |
| 644 | 22.59 | 37.37 | 48.84 | 43.32 | tr A0A0R4J259 A0A0R4J259_MOUSE | Heterogeneous nuclear ribonucleoprotein Q OS=Mus musculus OX=10090 GN=Syncrip PE=1 SV=1         | MOUSE | 19 |
| 645 | 22.59 | 23.38 | 44.79 | 37.29 | sp Q8BH44 COR2B_MOUSE          | Coronin-2B OS=Mus musculus OX=10090 GN=Coro2b PE=1 SV=2                                         | MOUSE | 12 |
| 646 | 22.54 | 24.69 | 40.58 | 38.04 | tr Q9D6G1 Q9D6G1_MOUSE         | Uncharacterized protein OS=Mus musculus OX=10090 GN=Hnnpab PE=2 SV=1                            | MOUSE | 15 |
| 647 | 22.52 | 22.65 | 55.58 | 43.38 | sp Q8QZS1 HIBCH_MOUSE          | 3-hydroxyisobutyryl-CoA hydrolase, mitochondrial OS=Mus musculus OX=10090 GN=Hibch PE=1 SV=1    | MOUSE | 14 |
| 648 | 22.49 | 22.51 | 98.67 | 85.84 | sp Q91XV3 BASP1_MOUSE          | Brain acid soluble protein 1 OS=Mus musculus OX=10090 GN=Basp1 PE=1 SV=3                        | MOUSE | 12 |
| 649 | 22.48 | 24.59 | 62.46 | 58.25 | sp Q99LD8 DDAH2_MOUSE          | N(G),N(G)-dimethylarginine dimethylaminohydrolase 2 OS=Mus musculus OX=10090 GN=Ddah2 PE=1 SV=1 | MOUSE | 14 |
| 650 | 22.46 | 29.42 | 59.35 | 55.69 | sp P68510 1433F_MOUSE          | 14-3-3 protein eta OS=Mus musculus OX=10090 GN=Ywhah PE=1 SV=2                                  | MOUSE | 16 |



|     |       |       |       |       |                        |                                                                                                                                          |       |    |
|-----|-------|-------|-------|-------|------------------------|------------------------------------------------------------------------------------------------------------------------------------------|-------|----|
| 651 | 22.46 | 22.67 | 41.31 | 34.58 | sp Q9EQ20 MMSA_MOUSE   | Methylmalonate-semialdehyde dehydrogenase [acylating], mitochondrial OS=Mus musculus OX=10090 GN=Aldh6a1 PE=1 SV=1                       | MOUSE | 13 |
| 652 | 22.46 | 22.63 | 42.02 | 28.72 | sp Q9R1C6 DGKE_MOUSE   | Diacylglycerol kinase epsilon OS=Mus musculus OX=10090 GN=Dgke PE=1 SV=1                                                                 | MOUSE | 13 |
| 653 | 22.44 | 22.58 | 23.25 | 16.25 | tr Q80U83 Q80U83_MOUSE | MKIAA0079 protein (Fragment) OS=Mus musculus OX=10090 GN=Sec24c PE=2 SV=1                                                                | MOUSE | 12 |
| 654 | 22.39 | 22.5  | 43.78 | 34.44 | tr Q3V3N6 Q3V3N6_MOUSE | COP9 signalosome complex subunit 2 OS=Mus musculus OX=10090 GN=Cops2 PE=2 SV=1                                                           | MOUSE | 11 |
| 655 | 22.37 | 22.43 | 77.39 | 68.20 | tr Q99N15 Q99N15_MOUSE | 17beta-hydroxysteroid dehydrogenase type 10/short chain L-3-hydroxyacyl-CoA dehydrogenase OS=Mus musculus OX=10090 GN=Hsd17b10 PE=1 SV=1 | MOUSE | 12 |
| 656 | 22.35 | 22.61 | 42.24 | 25.74 | tr Q3UT14 Q3UT14_MOUSE | Guanylate cyclase (Fragment) OS=Mus musculus OX=10090 GN=Gucy1b1 PE=2 SV=1                                                               | MOUSE | 12 |
| 657 | 22.29 | 26.62 | 52.53 | 49.64 | sp Q9Z2X1 HNRPF_MOUSE  | Heterogeneous nuclear ribonucleoprotein F OS=Mus musculus OX=10090 GN=Hnrnpf PE=1 SV=3                                                   | MOUSE | 15 |
| 658 | 22.27 | 22.33 | 53.87 | 50.83 | sp Q61474 MSI1H_MOUSE  | RNA-binding protein Musashi homolog 1 OS=Mus musculus OX=10090 GN=Msi1 PE=1 SV=1                                                         | MOUSE | 12 |
| 659 | 22.21 | 22.44 | 29.12 | 18.66 | sp P11103 PARP1_MOUSE  | Poly [ADP-ribose] polymerase 1 OS=Mus musculus OX=10090 GN=Parp1 PE=1 SV=3                                                               | MOUSE | 16 |
| 660 | 22.2  | 22.21 | 67.88 | 59.59 | tr Q4VAE6 Q4VAE6_MOUSE | Ras family member A OS=Mus musculus OX=10090 GN=Rhoa PE=1 SV=1                                                                           | MOUSE | 12 |
| 661 | 22.19 | 26.25 | 49.22 | 34.12 | tr Q05DD2 Q05DD2_MOUSE | Neurofilament light polypeptide (Fragment) OS=Mus musculus OX=10090 GN=Nefl PE=2 SV=1                                                    | MOUSE | 14 |
| 662 | 22.18 | 22.19 | 66.83 | 56.78 | sp Q9R1Q8 TAGL3_MOUSE  | Transgelin-3 OS=Mus musculus OX=10090 GN=Tagln3 PE=1 SV=1                                                                                | MOUSE | 14 |
| 663 | 22.17 | 22.18 | 43.34 | 39.93 | tr Q58EU3 Q58EU3_MOUSE | 40S ribosomal protein S2 OS=Mus musculus OX=10090 GN=Rps2 PE=1 SV=1                                                                      | MOUSE | 13 |
| 664 | 22.15 | 24.46 | 83.64 | 83.03 | tr Q4FK36 Q4FK36_MOUSE | Actin-depolymerizing factor OS=Mus musculus OX=10090 GN=Dstn PE=1 SV=1                                                                   | MOUSE | 16 |
| 665 | 22.03 | 22.1  | 61.29 | 51.21 | tr Q542H2 Q542H2_MOUSE | Proteasome subunit alpha type OS=Mus musculus OX=10090 GN=Pma7 PE=1 SV=1                                                                 | MOUSE | 12 |

|     |       |       |       |       |                        |                                                                                                                      |       |    |
|-----|-------|-------|-------|-------|------------------------|----------------------------------------------------------------------------------------------------------------------|-------|----|
| 666 | 22.03 | 22.07 | 51.54 | 49.23 | sp P97822 AN32E_MOUSE  | Acidic leucine-rich nuclear phosphoprotein 32 family member E OS=Mus musculus OX=10090 GN=Anp32e PE=1 SV=2           | MOUSE | 14 |
| 667 | 22    | 22    | 58.25 | 55.34 | sp P63330 PP2AA_MOUSE  | Serine/threonine-protein phosphatase 2A catalytic subunit alpha isoform OS=Mus musculus OX=10090 GN=Ppp2ca PE=1 SV=1 | MOUSE | 16 |
| 668 | 22    | 22    | 44.90 | 41.40 | sp Q80XN0 BDH_MOUSE    | D-beta-hydroxybutyrate dehydrogenase, mitochondrial OS=Mus musculus OX=10090 GN=Bdh1 PE=1 SV=2                       | MOUSE | 12 |
| 669 | 22    | 22    | 55.28 | 52.17 | tr Q810K5 Q810K5_MOUSE | Y box protein 1 OS=Mus musculus OX=10090 GN=Ybx1 PE=2 SV=1                                                           | MOUSE | 12 |
| 670 | 22    | 22    | 76.97 | 76.97 | tr A2RTT4 A2RTT4_MOUSE | Ubiquitin-conjugating enzyme E2N OS=Mus musculus OX=10090 GN=Ube2n PE=1 SV=1                                         | MOUSE | 12 |
| 671 | 21.98 | 22.05 | 18.82 | 9.90  | tr Q3U2W2 Q3U2W2_MOUSE | Uncharacterized protein OS=Mus musculus OX=10090 GN=Mybbp1a PE=1 SV=1                                                | MOUSE | 11 |
| 672 | 21.97 | 22.12 | 31.16 | 24.46 | tr D3YYT1 D3YYT1_MOUSE | Glyoxylate reductase 1 homolog OS=Mus musculus OX=10090 GN=Glyr1 PE=1 SV=1                                           | MOUSE | 11 |
| 673 | 21.97 | 22.09 | 59.85 | 52.27 | sp O55234 PSB5_MOUSE   | Proteasome subunit beta type-5 OS=Mus musculus OX=10090 GN=Psmb5 PE=1 SV=3                                           | MOUSE | 13 |
| 674 | 21.97 | 22.05 | 56.70 | 48.33 | tr Q8BKU2 Q8BKU2_MOUSE | 26S proteasome AAA-ATPase subunit RPT3 OS=Mus musculus OX=10090 GN=Psmc4 PE=2 SV=1                                   | MOUSE | 12 |
| 675 | 21.92 | 22.1  | 24.77 | 18.48 | tr Q542D9 Q542D9_MOUSE | Transferrin receptor protein 1 OS=Mus musculus OX=10090 GN=Tfrc PE=1 SV=1                                            | MOUSE | 12 |
| 676 | 21.89 | 22.07 | 40.88 | 27.45 | sp Q60676 PPP5_MOUSE   | Serine/threonine-protein phosphatase 5 OS=Mus musculus OX=10090 GN=Ppp5c PE=1 SV=3                                   | MOUSE | 13 |
| 677 | 21.85 | 21.91 | 56.61 | 50.51 | tr H3BKH6 H3BKH6_MOUSE | S-formylglutathione hydrolase OS=Mus musculus OX=10090 GN=Esd PE=1 SV=1                                              | MOUSE | 12 |
| 678 | 21.83 | 21.88 | 39.74 | 38.78 | sp Q8K183 PDXK_MOUSE   | Pyridoxal kinase OS=Mus musculus OX=10090 GN=Pdxk PE=1 SV=1                                                          | MOUSE | 11 |
| 679 | 21.8  | 21.9  | 40.57 | 29.14 | sp Q99J36 THUM1_MOUSE  | THUMP domain-containing protein 1 OS=Mus musculus OX=10090 GN=Thumpd1 PE=1 SV=1                                      | MOUSE | 10 |
| 680 | 21.75 | 22.11 | 11.80 | 9.01  | tr B9EJ54 B9EJ54_MOUSE | Nucleoporin 205 OS=Mus musculus OX=10090 GN=Nup205 PE=1 SV=1                                                         | MOUSE | 14 |
| 681 | 21.73 | 21.85 | 18.27 | 13.78 | sp Q9CSH3 RRP44_MOUSE  | Exosome complex exonuclease RRP44 OS=Mus musculus OX=10090 GN=Dis3 PE=1 SV=4                                         | MOUSE | 11 |

|     |       |       |       |       |                        |                                                                                                  |       |    |
|-----|-------|-------|-------|-------|------------------------|--------------------------------------------------------------------------------------------------|-------|----|
| 682 | 21.72 | 21.93 | 47.73 | 40.00 | sp Q8BGT8 PHIPL_MOUSE  | Phytanoyl-CoA hydroxylase-interacting protein-like OS=Mus musculus OX=10090 GN=Phyhipl PE=1 SV=1 | MOUSE | 14 |
| 683 | 21.71 | 21.78 | 36.29 | 34.22 | tr Q52L97 Q52L97_MOUSE | Importin subunit alpha OS=Mus musculus OX=10090 GN=Kpna2 PE=1 SV=1                               | MOUSE | 11 |
| 684 | 21.68 | 21.75 | 62.50 | 50.46 | tr Q9DCY1 Q9DCY1_MOUSE | Peptidyl-prolyl cis-trans isomerase OS=Mus musculus OX=10090 GN=Ppib PE=1 SV=1                   | MOUSE | 14 |
| 685 | 21.63 | 21.71 | 58.20 | 47.54 | tr Q3TIJ4 Q3TIJ4_MOUSE | RNA 3'-terminal phosphate cyclase OS=Mus musculus OX=10090 GN=Rtca PE=2 SV=1                     | MOUSE | 11 |
| 686 | 21.54 | 21.59 | 44.19 | 38.64 | sp P49442 INPP_MOUSE   | Inositol polyphosphate 1-phosphatase OS=Mus musculus OX=10090 GN=Inpp1 PE=1 SV=2                 | MOUSE | 11 |
| 687 | 21.52 | 25.46 | 83.66 | 68.32 | tr Q5SW88 Q5SW88_MOUSE | RAB1A, member RAS oncogene family OS=Mus musculus OX=10090 GN=Rab1a PE=1 SV=1                    | MOUSE | 13 |
| 688 | 21.47 | 21.6  | 37.82 | 28.08 | tr Q4FJL2 Q4FJL2_MOUSE | Reticulon OS=Mus musculus OX=10090 GN=Rtn1 PE=1 SV=1                                             | MOUSE | 12 |
| 689 | 21.45 | 21.66 | 21.82 | 11.91 | tr Q3TH57 Q3TH57_MOUSE | Uncharacterized protein OS=Mus musculus OX=10090 GN=Tcerg1 PE=2 SV=1                             | MOUSE | 12 |
| 690 | 21.45 | 21.49 | 69.05 | 57.14 | sp P19157 GSTP1_MOUSE  | Glutathione S-transferase P 1 OS=Mus musculus OX=10090 GN=Gstp1 PE=1 SV=2                        | MOUSE | 20 |
| 691 | 21.44 | 21.49 | 40.67 | 26.52 | tr Q3UIG0 Q3UIG0_MOUSE | Eukaryotic translation initiation factor 3 subunit E OS=Mus musculus OX=10090 GN=Eif3e PE=1 SV=1 | MOUSE | 11 |
| 692 | 21.41 | 21.43 | 64.80 | 62.76 | sp Q9DBP5 KCY_MOUSE    | UMP-CMP kinase OS=Mus musculus OX=10090 GN=Cmpk1 PE=1 SV=1                                       | MOUSE | 11 |
| 693 | 21.37 | 21.44 | 48.44 | 48.12 | sp Q9DCJ9 NPL_MOUSE    | N-acetylneuraminate lyase OS=Mus musculus OX=10090 GN=Npl PE=1 SV=1                              | MOUSE | 12 |
| 694 | 21.35 | 21.53 | 19.19 | 17.28 | sp Q810U4 NRCAM_MOUSE  | Neuronal cell adhesion molecule OS=Mus musculus OX=10090 GN=Nrcam PE=1 SV=2                      | MOUSE | 14 |
| 695 | 21.34 | 21.41 | 43.75 | 38.28 | tr E9PYH2 E9PYH2_MOUSE | Cytosolic acyl coenzyme A thioester hydrolase OS=Mus musculus OX=10090 GN=Acot7 PE=1 SV=1        | MOUSE | 12 |
| 696 | 21.32 | 21.43 | 56.83 | 53.14 | sp Q7TQI3 OTUB1_MOUSE  | Ubiquitin thioesterase OTUB1 OS=Mus musculus OX=10090 GN=Otub1 PE=1 SV=2                         | MOUSE | 15 |
| 697 | 21.32 | 21.35 | 40.71 | 36.71 | sp Q9DCL9 PUR6_MOUSE   | Multifunctional protein ADE2 OS=Mus musculus OX=10090 GN=Paics PE=1 SV=4                         | MOUSE | 15 |
| 698 | 21.3  | 21.75 | 55.56 | 45.93 | tr Q5M9N8 Q5M9N8_MOUSE | Ribosomal protein L7 OS=Mus musculus OX=10090 GN=Rpl7 PE=1 SV=1                                  | MOUSE | 14 |

|     |       |       |       |       |                                |                                                                                                              |       |    |
|-----|-------|-------|-------|-------|--------------------------------|--------------------------------------------------------------------------------------------------------------|-------|----|
| 699 | 21.28 | 21.68 | 27.58 | 12.37 | tr Q8CGB9 Q8CGB9_MOUSE         | Insulin-degrading enzyme OS=Mus musculus OX=10090 GN=Ide PE=1 SV=1                                           | MOUSE | 11 |
| 700 | 21.28 | 21.48 | 42.55 | 25.13 | sp P35235-1 PTN11_MOUSE        | Isoform 2 of Tyrosine-protein phosphatase non-receptor type 11 OS=Mus musculus OX=10090 GN=Ptpn11            | MOUSE | 11 |
| 701 | 21.22 | 21.35 | 29.40 | 20.28 | sp Q8R050 ERF3A_MOUSE          | Eukaryotic peptide chain release factor GTP-binding subunit ERF3A OS=Mus musculus OX=10090 GN=Gsp1 PE=1 SV=2 | MOUSE | 12 |
| 702 | 21.21 | 21.32 | 31.42 | 22.91 | tr A0A0R4J107 A0A0R4J107_MOUSE | Acyl-peptide hydrolase (Fragment) OS=Mus musculus OX=10090 GN=Apeh PE=1 SV=1                                 | MOUSE | 11 |
| 703 | 21.18 | 23.46 | 37.04 | 30.71 | tr B2RRX2 B2RRX2_MOUSE         | Serine/threonine-protein phosphatase OS=Mus musculus OX=10090 GN=Ppp3ca PE=2 SV=1                            | MOUSE | 14 |
| 704 | 21.17 | 21.24 | 68.39 | 56.99 | tr Q3TTY6 Q3TTY6_MOUSE         | Uncharacterized protein (Fragment) OS=Mus musculus OX=10090 GN=Lin7c PE=2 SV=1                               | MOUSE | 12 |
| 705 | 21.15 | 21.53 | 67.45 | 66.98 | tr Q0PD65 Q0PD65_MOUSE         | Rab2A OS=Mus musculus OX=10090 GN=Rab2a PE=1 SV=1                                                            | MOUSE | 15 |
| 706 | 21.12 | 21.42 | 31.74 | 22.87 | sp Q8QZY1 EIF3L_MOUSE          | Eukaryotic translation initiation factor 3 subunit L OS=Mus musculus OX=10090 GN=Eif3l PE=1 SV=1             | MOUSE | 11 |
| 707 | 21.12 | 21.15 | 37.45 | 30.04 | tr Q3TDA7 Q3TDA7_MOUSE         | Uncharacterized protein OS=Mus musculus OX=10090 GN=Pascin2 PE=1 SV=1                                        | MOUSE | 12 |
| 708 | 21.08 | 21.15 | 23.52 | 20.55 | tr Q8R056 Q8R056_MOUSE         | Prom1 protein OS=Mus musculus OX=10090 GN=Prom1 PE=1 SV=1                                                    | MOUSE | 15 |
| 709 | 21.07 | 24.71 | 78.90 | 58.23 | sp P51859 HDGF_MOUSE           | Hepatoma-derived growth factor OS=Mus musculus OX=10090 GN=Hdgf PE=1 SV=2                                    | MOUSE | 15 |
| 710 | 21.05 | 21.86 | 30.03 | 20.28 | tr Q3U6A2 Q3U6A2_MOUSE         | Uncharacterized protein OS=Mus musculus OX=10090 GN=Rbm14 PE=2 SV=1                                          | MOUSE | 12 |
| 711 | 21.04 | 21.3  | 25.07 | 12.94 | tr B7ZJ3 B7ZJ3_MOUSE           | Caskin1 protein OS=Mus musculus OX=10090 GN=Caskin1 PE=2 SV=1                                                | MOUSE | 11 |
| 712 | 21.04 | 21.25 | 29.07 | 21.17 | tr Q05DR5 Q05DR5_MOUSE         | FACT complex subunit SSRP1 (Fragment) OS=Mus musculus OX=10090 GN=Ssrp1 PE=2 SV=1                            | MOUSE | 12 |
| 713 | 21    | 21.13 | 63.16 | 48.68 | tr Q5ND51 Q5ND51_MOUSE         | V-crk sarcoma virus CT10 oncogene-like protein OS=Mus musculus OX=10090 GN=Crk PE=2 SV=1                     | MOUSE | 11 |
| 714 | 20.98 | 21.32 | 43.40 | 35.64 | tr Q99NF7 Q99NF7_MOUSE         | Protein-serine/threonine phosphatase OS=Mus musculus OX=10090 GN=Ppm1b PE=1 SV=1                             | MOUSE | 12 |

|     |       |       |       |       |                            |                                                                                                                          |       |    |
|-----|-------|-------|-------|-------|----------------------------|--------------------------------------------------------------------------------------------------------------------------|-------|----|
| 715 | 20.97 | 21.03 | 57.66 | 54.05 | tr Q4FJX9 Q4FJX9_<br>MOUSE | Superoxide dismutase OS=Mus musculus OX=10090<br>GN=Sod2 PE=1 SV=1                                                       | MOUSE | 16 |
| 716 | 20.96 | 21.01 | 45.49 | 39.75 | tr A2AE89 A2AE89_<br>MOUSE | Glutathione transferase OS=Mus musculus OX=10090<br>GN=Gstm1 PE=1 SV=2                                                   | MOUSE | 11 |
| 717 | 20.95 | 21.05 | 42.92 | 25.19 | tr F8VQC1 F8VQC1_<br>MOUSE | Signal recognition particle subunit SRP72 OS=Mus<br>musculus OX=10090 GN=Srp72 PE=1 SV=1                                 | MOUSE | 11 |
| 718 | 20.95 | 21.02 | 38.21 | 38.21 | sp Q921H8 THIKA_<br>MOUSE  | 3-ketoacyl-CoA thiolase A, peroxisomal OS=Mus musculus<br>OX=10090 GN=Acaa1a PE=1 SV=1                                   | MOUSE | 12 |
| 719 | 20.93 | 21.01 | 55.06 | 45.34 | tr Q3UJH5 Q3UJH5_<br>MOUSE | V-type proton ATPase subunit D OS=Mus musculus<br>OX=10090 GN=Atp6v1d PE=2 SV=1                                          | MOUSE | 10 |
| 720 | 20.91 | 21.07 | 54.26 | 40.78 | tr Q3TE45 Q3TE45_<br>MOUSE | Succinate dehydrogenase [ubiquinone] iron-sulfur subunit,<br>mitochondrial OS=Mus musculus OX=10090 GN=Sdhb PE=2<br>SV=1 | MOUSE | 12 |
| 721 | 20.86 | 21.07 | 34.52 | 24.01 | sp Q9CZN7 GLYM_<br>MOUSE   | Serine hydroxymethyltransferase, mitochondrial OS=Mus<br>musculus OX=10090 GN=Shmt2 PE=1 SV=1                            | MOUSE | 11 |
| 722 | 20.86 | 20.93 | 33.63 | 32.30 | tr Q3UR33 Q3UR33_<br>MOUSE | Uncharacterized protein OS=Mus musculus OX=10090<br>GN=Tmpo PE=2 SV=1                                                    | MOUSE | 13 |
| 723 | 20.82 | 20.93 | 42.55 | 31.75 | tr Q3U4K3 Q3U4K3_<br>MOUSE | Complex I-9kD (Fragment) OS=Mus musculus OX=10090<br>GN=Ndufv3 PE=2 SV=1                                                 | MOUSE | 11 |
| 724 | 20.81 | 20.96 | 29.95 | 25.20 | tr Q6NXZ0 Q6NXZ0_<br>MOUSE | Dipeptidyl peptidase 3 OS=Mus musculus OX=10090<br>GN=Dpp3 PE=2 SV=1                                                     | MOUSE | 13 |
| 725 | 20.79 | 20.95 | 79.31 | 64.37 | tr Q5XJZ8 Q5XJZ8_<br>MOUSE | Glutathione peroxidase (Fragment) OS=Mus musculus<br>OX=10090 GN=Gpx4 PE=2 SV=3                                          | MOUSE | 14 |
| 726 | 20.74 | 20.88 | 25.72 | 13.07 | sp Q91YR7 PRP6_M<br>OUSE   | Pre-mRNA-processing factor 6 OS=Mus musculus<br>OX=10090 GN=Prpf6 PE=1 SV=1                                              | MOUSE | 11 |
| 727 | 20.69 | 20.79 | 30.49 | 20.88 | sp P50544 ACADV_<br>MOUSE  | Very long-chain specific acyl-CoA dehydrogenase,<br>mitochondrial OS=Mus musculus OX=10090 GN=Acadv1<br>PE=1 SV=3        | MOUSE | 10 |
| 728 | 20.65 | 20.81 | 32.53 | 20.51 | tr Q8R2P8 Q8R2P8_<br>MOUSE | Lysine--tRNA ligase OS=Mus musculus OX=10090<br>GN=Kars PE=1 SV=1                                                        | MOUSE | 11 |
| 729 | 20.63 | 20.76 | 65.65 | 62.60 | tr Q91XH5 Q91XH5_<br>MOUSE | Sepiapterin reductase OS=Mus musculus OX=10090<br>GN=Spr PE=1 SV=1                                                       | MOUSE | 12 |
| 730 | 20.51 | 20.59 | 48.39 | 41.01 | tr Q5XJF6 Q5XJF6_<br>MOUSE | Ribosomal protein OS=Mus musculus OX=10090<br>GN=Rpl10a PE=1 SV=1                                                        | MOUSE | 11 |

|     |       |       |       |       |                                |                                                                                          |       |     |
|-----|-------|-------|-------|-------|--------------------------------|------------------------------------------------------------------------------------------|-------|-----|
| 731 | 20.48 | 20.5  | 61.72 | 52.07 | sp Q9QZE7 TSNAX_MOUSE          | Translin-associated protein X OS=Mus musculus OX=10090 GN=Tsnax PE=1 SV=1                | MOUSE | 12  |
| 732 | 20.46 | 20.94 | 29.94 | 15.99 | sp O55201 SPT5H_MOUSE          | Transcription elongation factor SPT5 OS=Mus musculus OX=10090 GN=Supt5h PE=1 SV=1        | MOUSE | 11  |
| 733 | 20.45 | 20.51 | 83.80 | 83.80 | tr Q9CY10 Q9CY10_MOUSE         | GLOBIN domain-containing protein OS=Mus musculus OX=10090 PE=2 SV=1                      | MOUSE | 16  |
| 734 | 20.43 | 20.55 | 67.95 | 41.03 | tr Q0VGQ1 Q0VGQ1_MOUSE         | Hydroxysteroid (17-beta) dehydrogenase 12 OS=Mus musculus OX=10090 GN=Hsd17b12 PE=2 SV=1 | MOUSE | 10  |
| 735 | 20.4  | 20.77 | 26.23 | 21.61 | tr F8VQ42 F8VQ42_MOUSE         | Kinesin-like protein (Fragment) OS=Mus musculus OX=10090 GN=Kif2a PE=1 SV=1              | MOUSE | 12  |
| 736 | 20.4  | 20.46 | 34.63 | 31.76 | tr A0A0R4J008 A0A0R4J008_MOUSE | Histone deacetylase 2 OS=Mus musculus OX=10090 GN=Hdac2 PE=1 SV=1                        | MOUSE | 11  |
| 737 | 20.36 | 20.77 | 48.62 | 45.57 | tr Q3UJS2 Q3UJS2_MOUSE         | Uncharacterized protein OS=Mus musculus OX=10090 GN=Fbl PE=2 SV=1                        | MOUSE | 11  |
| 738 | 20.33 | 94.31 | 86.74 | 86.74 | tr B2RSN3 B2RSN3_MOUSE         | Tubulin beta chain OS=Mus musculus OX=10090 GN=Tubb2b PE=1 SV=1                          | MOUSE | 129 |
| 739 | 20.33 | 20.4  | 30.30 | 26.58 | tr Q80W12 Q80W12_MOUSE         | TROVE domain family, member 2 OS=Mus musculus OX=10090 GN=Ro60 PE=2 SV=1                 | MOUSE | 11  |
| 740 | 20.32 | 20.51 | 24.90 | 20.78 | tr Q3TYK4 Q3TYK4_MOUSE         | Uncharacterized protein OS=Mus musculus OX=10090 GN=Prkar1a PE=2 SV=1                    | MOUSE | 11  |
| 741 | 20.3  | 20.64 | 29.67 | 15.75 | sp Q8BJ71 NUP93_MOUSE          | Nuclear pore complex protein Nup93 OS=Mus musculus OX=10090 GN=Nup93 PE=1 SV=1           | MOUSE | 10  |
| 742 | 20.3  | 20.31 | 53.41 | 45.65 | sp Q8VCA8 SCRN2_MOUSE          | Secernin-2 OS=Mus musculus OX=10090 GN=Scrn2 PE=1 SV=1                                   | MOUSE | 10  |
| 743 | 20.25 | 20.44 | 40.25 | 37.97 | tr Q543C7 Q543C7_MOUSE         | Uncharacterized protein OS=Mus musculus OX=10090 GN=Nr2e3 PE=2 SV=1                      | MOUSE | 12  |
| 744 | 20.2  | 20.42 | 15.55 | 9.97  | tr B9EHJ3 B9EHJ3_MOUSE         | Tight junction protein ZO-1 OS=Mus musculus OX=10090 GN=Tjp1 PE=1 SV=1                   | MOUSE | 13  |
| 745 | 20.2  | 20.32 | 55.69 | 43.41 | sp O35864 CSN5_MOUSE           | COP9 signalosome complex subunit 5 OS=Mus musculus OX=10090 GN=Cops5 PE=1 SV=3           | MOUSE | 11  |
| 746 | 20.17 | 20.18 | 63.81 | 60.00 | tr Q56A15 Q56A15_MOUSE         | Cytochrome c OS=Mus musculus OX=10090 GN=Cycs PE=1 SV=1                                  | MOUSE | 14  |
| 747 | 20.15 | 20.32 | 55.51 | 50.61 | tr G5E8R0 G5E8R0_MOUSE         | Tropomyosin alpha-1 chain OS=Mus musculus OX=10090 GN=Tpm1 PE=1 SV=1                     | MOUSE | 11  |

|     |       |       |       |       |                        |                                                                                                            |       |    |
|-----|-------|-------|-------|-------|------------------------|------------------------------------------------------------------------------------------------------------|-------|----|
| 748 | 20.13 | 23.79 | 60.89 | 54.46 | sp Q9JMG7 HDGR3_MOUSE  | Hepatoma-derived growth factor-related protein 3 OS=Mus musculus OX=10090 GN=Hdgfl3 PE=1 SV=2              | MOUSE | 23 |
| 749 | 20.12 | 20.16 | 53.02 | 52.56 | sp O08547 SC22B_MOUSE  | Vesicle-trafficking protein SEC22b OS=Mus musculus OX=10090 GN=Sec22b PE=1 SV=3                            | MOUSE | 11 |
| 750 | 20.08 | 20.08 | 52.28 | 48.73 | tr Q545R3 Q545R3_MOUSE | N-myc downstream-regulated gene 1 protein OS=Mus musculus OX=10090 GN=Ndr1 PE=1 SV=1                       | MOUSE | 14 |
| 751 | 20.06 | 20.7  | 23.38 | 16.12 | sp Q8BGC0 HTSF1_MOUSE  | HIV Tat-specific factor 1 homolog OS=Mus musculus OX=10090 GN=Htatsf1 PE=1 SV=1                            | MOUSE | 12 |
| 752 | 20.06 | 20.06 | 24.85 | 22.10 | tr Q6NVA3 Q6NVA3_MOUSE | Ewing sarcoma breakpoint region 1 OS=Mus musculus OX=10090 GN=Ewsr1 PE=2 SV=1                              | MOUSE | 13 |
| 753 | 20.04 | 20.07 | 43.13 | 43.13 | sp P47963 RL13_MOUSE   | 60S ribosomal protein L13 OS=Mus musculus OX=10090 GN=Rpl13 PE=1 SV=3                                      | MOUSE | 11 |
| 754 | 20.02 | 20.21 | 21.78 | 10.46 | tr E9Q683 E9Q683_MOUSE | Voltage-dependent calcium channel subunit alpha-2/delta-2 OS=Mus musculus OX=10090 GN=Cacna2d2 PE=1 SV=2   | MOUSE | 10 |
| 755 | 20.01 | 20.27 | 40.09 | 27.37 | tr Q3UUH0 Q3UUH0_MOUSE | Uncharacterized protein OS=Mus musculus OX=10090 GN=Asl PE=2 SV=1                                          | MOUSE | 10 |
| 756 | 20.01 | 20.1  | 44.73 | 32.90 | sp Q99JI4 PSMD6_MOUSE  | 26S proteasome non-ATPase regulatory subunit 6 OS=Mus musculus OX=10090 GN=Psm6 PE=1 SV=1                  | MOUSE | 12 |
| 757 | 20.01 | 20.01 | 63.40 | 59.28 | sp Q9R0Y5 KAD1_MOUSE   | Adenylate kinase isoenzyme 1 OS=Mus musculus OX=10090 GN=Ak1 PE=1 SV=1                                     | MOUSE | 11 |
| 758 | 20    | 20    | 60.08 | 55.65 | sp Q9D6J6 NDUV2_MOUSE  | NADH dehydrogenase [ubiquinone] flavoprotein 2, mitochondrial OS=Mus musculus OX=10090 GN=Ndufv2 PE=1 SV=2 | MOUSE | 11 |
| 759 | 19.98 | 20.03 | 48.24 | 39.22 | sp O08583 THOC4_MOUSE  | THO complex subunit 4 OS=Mus musculus OX=10090 GN=Alyref PE=1 SV=3                                         | MOUSE | 14 |
| 760 | 19.94 | 20.09 | 66.27 | 54.82 | tr Q9DB79 Q9DB79_MOUSE | 40S ribosomal protein S11 OS=Mus musculus OX=10090 GN=Rps11 PE=2 SV=1                                      | MOUSE | 11 |
| 761 | 19.93 | 19.97 | 66.96 | 63.00 | tr Q545L9 Q545L9_MOUSE | Protein-L-isoaspartate O-methyltransferase OS=Mus musculus OX=10090 GN=Pcm1 PE=2 SV=1                      | MOUSE | 11 |
| 762 | 19.86 | 19.9  | 46.44 | 40.25 | tr Q8C0E1 Q8C0E1_MOUSE | Serine/threonine-protein phosphatase 2A activator OS=Mus musculus OX=10090 GN=Ptpa PE=2 SV=1               | MOUSE | 10 |
| 763 | 19.85 | 19.97 | 53.31 | 51.36 | tr Q3UJS0 Q3UJS0_MOUSE | 60S ribosomal protein L8 OS=Mus musculus OX=10090 GN=Rpl8 PE=2 SV=1                                        | MOUSE | 12 |

|     |       |       |       |       |                                |                                                                                                        |       |    |
|-----|-------|-------|-------|-------|--------------------------------|--------------------------------------------------------------------------------------------------------|-------|----|
| 764 | 19.83 | 20.42 | 41.08 | 28.39 | sp Q9D0L8 MCES_MOUSE           | mRNA cap guanine-N7 methyltransferase OS=Mus musculus OX=10090 GN=Rnmt PE=1 SV=1                       | MOUSE | 10 |
| 765 | 19.83 | 19.96 | 41.56 | 27.22 | tr Q5PPQ7 Q5PPQ7_MOUSE         | Coronin OS=Mus musculus OX=10090 GN=Coro1c PE=2 SV=1                                                   | MOUSE | 10 |
| 766 | 19.83 | 19.89 | 75.65 | 60.62 | sp O88848-2 ARL6_MOUSE         | Isoform 2 of ADP-ribosylation factor-like protein 6 OS=Mus musculus OX=10090 GN=Arl6                   | MOUSE | 10 |
| 767 | 19.82 | 19.88 | 57.81 | 57.81 | tr Q8BPG5 Q8BPG5_MOUSE         | Uncharacterized protein OS=Mus musculus OX=10090 GN=Rac1 PE=2 SV=1                                     | MOUSE | 12 |
| 768 | 19.8  | 48    | 52.09 | 37.20 | tr A1BN54 A1BN54_MOUSE         | Alpha actinin 1a OS=Mus musculus OX=10090 GN=Actn1 PE=1 SV=1                                           | MOUSE | 28 |
| 769 | 19.79 | 19.89 | 47.17 | 37.74 | tr Q3TI27 Q3TI27_MOUSE         | Ribose-phosphate diphosphokinase OS=Mus musculus OX=10090 GN=Prps1 PE=2 SV=1                           | MOUSE | 10 |
| 770 | 19.75 | 20.09 | 47.95 | 33.98 | sp Q9DBE8 ALG2_MOUSE           | Alpha-1,3/1,6-mannosyltransferase ALG2 OS=Mus musculus OX=10090 GN=Alg2 PE=1 SV=2                      | MOUSE | 10 |
| 771 | 19.75 | 19.82 | 50.20 | 44.71 | sp Q9DCW4 ETFB_MOUSE           | Electron transfer flavoprotein subunit beta OS=Mus musculus OX=10090 GN=Etfb PE=1 SV=3                 | MOUSE | 11 |
| 772 | 19.69 | 19.79 | 55.67 | 55.67 | sp Q9CVB6 ARPC2_MOUSE          | Actin-related protein 2/3 complex subunit 2 OS=Mus musculus OX=10090 GN=Arpc2 PE=1 SV=3                | MOUSE | 12 |
| 773 | 19.69 | 19.74 | 66.08 | 60.79 | sp Q9CQF3 CPSF5_MOUSE          | Cleavage and polyadenylation specificity factor subunit 5 OS=Mus musculus OX=10090 GN=Nudt21 PE=1 SV=1 | MOUSE | 11 |
| 774 | 19.64 | 19.69 | 42.24 | 36.02 | tr Q3TXK9 Q3TXK9_MOUSE         | Glutathione reductase (Fragment) OS=Mus musculus OX=10090 GN=Gsr PE=2 SV=1                             | MOUSE | 11 |
| 775 | 19.6  | 19.72 | 45.53 | 43.63 | tr Q8BK37 Q8BK37_MOUSE         | Pribosyltran_N domain-containing protein OS=Mus musculus OX=10090 GN=Prpsap2 PE=2 SV=1                 | MOUSE | 11 |
| 776 | 19.58 | 19.63 | 34.35 | 31.58 | sp P55264 ADK_MOUSE            | Adenosine kinase OS=Mus musculus OX=10090 GN=Adk PE=1 SV=2                                             | MOUSE | 10 |
| 777 | 19.57 | 19.74 | 48.48 | 21.36 | tr B2RRH9 B2RRH9_MOUSE         | Glutamine amidotransferase OS=Mus musculus OX=10090 GN=Gmps PE=1 SV=1                                  | MOUSE | 9  |
| 778 | 19.55 | 19.75 | 38.50 | 34.75 | sp Q9JMH6 TRXR1_MOUSE          | Thioredoxin reductase 1, cytoplasmic OS=Mus musculus OX=10090 GN=Txnrd1 PE=1 SV=3                      | MOUSE | 13 |
| 779 | 19.43 | 78.77 | 89.31 | 80.08 | tr A0A0A0MQA5 A0A0A0MQA5_MOUSE | Tubulin alpha chain (Fragment) OS=Mus musculus OX=10090 GN=Tuba4a PE=1 SV=1                            | MOUSE | 90 |



|     |       |       |       |       |                                |                                                                                                                   |       |    |
|-----|-------|-------|-------|-------|--------------------------------|-------------------------------------------------------------------------------------------------------------------|-------|----|
| 780 | 19.42 | 19.61 | 41.88 | 28.18 | sp Q5XJY5 COPD_MOUSE           | Coatomer subunit delta OS=Mus musculus OX=10090<br>GN=Arcn1 PE=1 SV=2                                             | MOUSE | 11 |
| 781 | 19.33 | 21.57 | 43.23 | 22.08 | tr B9EHZ5 B9EHZ5_MOUSE         | Membrane protein, palmitoylated 6 (MAGUK p55<br>subfamily member 6) OS=Mus musculus OX=10090<br>GN=Mpp6 PE=2 SV=1 | MOUSE | 10 |
| 782 | 19.3  | 19.36 | 69.57 | 57.61 | tr Q5XK38 Q5XK38_MOUSE         | Hmgn2 protein OS=Mus musculus OX=10090 GN=Hmgn2<br>PE=1 SV=1                                                      | MOUSE | 57 |
| 783 | 19.26 | 19.71 | 45.15 | 38.83 | tr Q3TFF0 Q3TFF0_MOUSE         | Uncharacterized protein OS=Mus musculus OX=10090<br>GN=Dnaja2 PE=2 SV=1                                           | MOUSE | 11 |
| 784 | 19.23 | 19.37 | 80.39 | 78.43 | tr Q4KL76 Q4KL76_MOUSE         | 10 kDa heat shock protein, mitochondrial OS=Mus<br>musculus OX=10090 GN=Hspe1 PE=1 SV=1                           | MOUSE | 11 |
| 785 | 19.23 | 19.32 | 32.13 | 22.41 | sp Q9QZM0 UBQL2_MOUSE          | Ubiquilin-2 OS=Mus musculus OX=10090 GN=Ubqln2<br>PE=1 SV=2                                                       | MOUSE | 10 |
| 786 | 19.21 | 21.57 | 20.55 | 13.99 | tr A0A1D5RM83 A0A1D5RM83_MOUSE | IQ motif and SEC7 domain-containing protein 1 OS=Mus<br>musculus OX=10090 GN=Iqsec1 PE=1 SV=1                     | MOUSE | 12 |
| 787 | 19.14 | 19.36 | 17.63 | 12.27 | sp Q6GQT9 NOMO1_MOUSE          | Nodal modulator 1 OS=Mus musculus OX=10090<br>GN=Nomo1 PE=1 SV=1                                                  | MOUSE | 11 |
| 788 | 19.14 | 19.21 | 37.86 | 32.82 | tr Q3UBP0 Q3UBP0_MOUSE         | Adenylosuccinate synthetase isozyme 1 OS=Mus musculus<br>OX=10090 GN=Adssl1 PE=2 SV=1                             | MOUSE | 10 |
| 789 | 19.13 | 19.2  | 59.39 | 54.24 | sp Q9DAW9 CNN3_MOUSE           | Calponin-3 OS=Mus musculus OX=10090 GN=Cnn3 PE=1<br>SV=1                                                          | MOUSE | 11 |
| 790 | 19.12 | 19.19 | 28.92 | 28.92 | tr Q8BT09 Q8BT09_MOUSE         | 40S ribosomal protein S6 OS=Mus musculus OX=10090<br>PE=2 SV=1                                                    | MOUSE | 12 |
| 791 | 19.12 | 19.19 | 33.71 | 33.43 | tr Q4FJN9 Q4FJN9_MOUSE         | Fdps protein OS=Mus musculus OX=10090 GN=Fdps PE=1<br>SV=1                                                        | MOUSE | 10 |
| 792 | 19.1  | 35.48 | 51.11 | 50.37 | tr Q52KC1 Q52KC1_MOUSE         | RNA helicase OS=Mus musculus OX=10090 GN=Eif4a2<br>PE=2 SV=1                                                      | MOUSE | 19 |
| 793 | 19.08 | 19.48 | 18.86 | 7.59  | sp E9Q7G0 NUMA1_MOUSE          | Nuclear mitotic apparatus protein 1 OS=Mus musculus<br>OX=10090 GN=Numa1 PE=1 SV=1                                | MOUSE | 10 |
| 794 | 19.08 | 19.17 | 72.93 | 59.83 | sp Q9CXW3 CYBP_MOUSE           | Calcydin-binding protein OS=Mus musculus OX=10090<br>GN=Cacybp PE=1 SV=1                                          | MOUSE | 10 |
| 795 | 19.05 | 19.15 | 56.74 | 40.66 | tr Q3UQL2 Q3UQL2_MOUSE         | COP9 signalosome complex subunit 3 OS=Mus musculus<br>OX=10090 GN=Cops3 PE=1 SV=1                                 | MOUSE | 10 |

|     |       |       |       |       |                                |                                                                                                             |       |    |
|-----|-------|-------|-------|-------|--------------------------------|-------------------------------------------------------------------------------------------------------------|-------|----|
| 796 | 18.99 | 19.1  | 49.07 | 47.22 | tr A0A140LHA2 A0A140LHA2_MOUSE | Mitotic checkpoint protein BUB3 OS=Mus musculus<br>OX=10090 GN=Bub3 PE=1 SV=1                               | MOUSE | 12 |
| 797 | 18.98 | 19.09 | 29.06 | 23.33 | sp Q8R326 PSPC1_MOUSE          | Paraspeckle component 1 OS=Mus musculus OX=10090<br>GN=Pspc1 PE=1 SV=1                                      | MOUSE | 10 |
| 798 | 18.98 | 19.01 | 35.81 | 29.77 | tr A0A0R4J083 A0A0R4J083_MOUSE | Long-chain specific acyl-CoA dehydrogenase,<br>mitochondrial OS=Mus musculus OX=10090 GN=Acadl<br>PE=1 SV=1 | MOUSE | 11 |
| 799 | 18.97 | 19.1  | 26.20 | 13.28 | tr Q6PCP0 Q6PCP0_MOUSE         | RNA helicase OS=Mus musculus OX=10090 GN=Ddx21<br>PE=2 SV=1                                                 | MOUSE | 9  |
| 800 | 18.93 | 19.06 | 57.57 | 43.24 | sp Q9R0Q6 ARC1A_MOUSE          | Actin-related protein 2/3 complex subunit 1A OS=Mus<br>musculus OX=10090 GN=Arpc1a PE=1 SV=1                | MOUSE | 11 |
| 801 | 18.92 | 18.94 | 27.99 | 26.64 | tr V9GX43 V9GX43_MOUSE         | CUGBP Elav-like family member 2 (Fragment) OS=Mus<br>musculus OX=10090 GN=Celf2 PE=1 SV=1                   | MOUSE | 13 |
| 802 | 18.9  | 18.99 | 71.33 | 56.99 | tr Q5DQJ3 Q5DQJ3_MOUSE         | F-actin-capping protein subunit alpha OS=Mus musculus<br>OX=10090 GN=Capza2 PE=1 SV=1                       | MOUSE | 11 |
| 803 | 18.89 | 18.97 | 71.28 | 56.38 | tr Q5J7N1 Q5J7N1_MOUSE         | Kras protein OS=Mus musculus OX=10090 GN=Kras PE=2<br>SV=1                                                  | MOUSE | 11 |
| 804 | 18.85 | 18.99 | 17.39 | 13.52 | tr B9EJ23 B9EJ23_MOUSE         | Cask protein OS=Mus musculus OX=10090 GN=Cask PE=2<br>SV=1                                                  | MOUSE | 10 |
| 805 | 18.85 | 18.97 | 15.85 | 9.29  | sp Q6P9K9 NRX3A_MOUSE          | Neurexin-3 OS=Mus musculus OX=10090 GN=Nrxn3 PE=1<br>SV=2                                                   | MOUSE | 11 |
| 806 | 18.79 | 18.92 | 40.97 | 29.17 | tr Q0VEE0 Q0VEE0_MOUSE         | Ecto-5'-nucleotidase OS=Mus musculus OX=10090 GN=Nt5e<br>PE=1 SV=1                                          | MOUSE | 11 |
| 807 | 18.79 | 18.86 | 69.62 | 39.78 | tr Q547J4 Q547J4_MOUSE         | Microtubule-associated protein OS=Mus musculus<br>OX=10090 GN=Mapt PE=2 SV=1                                | MOUSE | 19 |
| 808 | 18.78 | 18.94 | 35.32 | 29.59 | tr B1AT36 B1AT36_MOUSE         | 26S proteasome non-ATPase regulatory subunit 12 OS=Mus<br>musculus OX=10090 GN=Psm12 PE=1 SV=1              | MOUSE | 10 |
| 809 | 18.77 | 20.25 | 53.00 | 45.50 | tr Q544R9 Q544R9_MOUSE         | High mobility group box 3 OS=Mus musculus OX=10090<br>GN=Hmgb3 PE=1 SV=1                                    | MOUSE | 13 |
| 810 | 18.76 | 18.89 | 39.72 | 37.50 | tr Q3TPJ8 Q3TPJ8_MOUSE         | Cytoplasmic dynein 1 intermediate chain 2 OS=Mus<br>musculus OX=10090 GN=Dync1i2 PE=1 SV=1                  | MOUSE | 12 |
| 811 | 18.72 | 18.91 | 39.64 | 28.70 | tr Q3TYE5 Q3TYE5_MOUSE         | Limbic system-associated membrane protein OS=Mus<br>musculus OX=10090 GN=Lsamp PE=1 SV=1                    | MOUSE | 11 |

|     |       |       |       |       |                                  |                                                                                                                                  |       |    |
|-----|-------|-------|-------|-------|----------------------------------|----------------------------------------------------------------------------------------------------------------------------------|-------|----|
| 812 | 18.72 | 18.76 | 69.80 | 69.80 | tr A0A0A0MQM0 A0A0A0MQM0_MOUSE_E | Eukaryotic translation initiation factor 5A (Fragment)<br>OS=Mus musculus OX=10090 GN=Eif5a PE=1 SV=1                            | MOUSE | 11 |
| 813 | 18.63 | 18.79 | 21.60 | 18.37 | sp Q80YV4-2 PANK4_MOUSE          | Isoform 2 of 4'-phosphopantetheine phosphatase OS=Mus musculus OX=10090 GN=Pank4                                                 | MOUSE | 11 |
| 814 | 18.61 | 18.67 | 59.76 | 37.20 | tr Q3T9Z2 Q3T9Z2_MOUSE           | Uncharacterized protein OS=Mus musculus OX=10090 GN=Grhpr PE=1 SV=1                                                              | MOUSE | 9  |
| 815 | 18.59 | 20.87 | 33.79 | 19.03 | sp Q9QYB8 ADDB_MOUSE             | Beta-adducin OS=Mus musculus OX=10090 GN=Add2 PE=1 SV=4                                                                          | MOUSE | 11 |
| 816 | 18.58 | 18.7  | 12.95 | 9.74  | sp Q80XH2 IMPG2_MOUSE            | Interphotoreceptor matrix proteoglycan 2 OS=Mus musculus OX=10090 GN=Impg2 PE=1 SV=1                                             | MOUSE | 10 |
| 817 | 18.58 | 18.64 | 22.04 | 21.70 | tr Q6PCX2 Q6PCX2_MOUSE           | Transporter OS=Mus musculus OX=10090 GN=Slc6a1 PE=2 SV=1                                                                         | MOUSE | 14 |
| 818 | 18.52 | 18.64 | 26.06 | 21.97 | sp P57776-3 EF1D_MOUSE           | Isoform 3 of Elongation factor 1-delta OS=Mus musculus OX=10090 GN=Eef1d                                                         | MOUSE | 11 |
| 819 | 18.5  | 18.72 | 42.15 | 39.24 | tr Q8BG33 Q8BG33_MOUSE           | Neurotrimin OS=Mus musculus OX=10090 GN=Ntm PE=1 SV=1                                                                            | MOUSE | 10 |
| 820 | 18.5  | 18.55 | 87.86 | 83.57 | tr Q5SX50 Q5SX50_MOUSE           | Profilin OS=Mus musculus OX=10090 GN=Pfn1 PE=1 SV=1                                                                              | MOUSE | 11 |
| 821 | 18.44 | 18.52 | 58.27 | 51.50 | sp Q9D172 GAL3A_MOUSE            | Glutamine amidotransferase-like class 1 domain-containing protein 3A, mitochondrial OS=Mus musculus OX=10090 GN=Gatd3a PE=1 SV=1 | MOUSE | 9  |
| 822 | 18.42 | 18.53 | 81.18 | 65.59 | tr Q3TF84 Q3TF84_MOUSE           | Uncharacterized protein OS=Mus musculus OX=10090 GN=Lrrc59 PE=2 SV=1                                                             | MOUSE | 15 |
| 823 | 18.36 | 18.42 | 21.77 | 14.26 | tr B2RUG7 B2RUG7_MOUSE           | Zinc finger RNA binding protein OS=Mus musculus OX=10090 GN=Zfr PE=2 SV=1                                                        | MOUSE | 11 |
| 824 | 18.33 | 18.45 | 43.04 | 28.61 | sp Q9EQP6 ARRC_MOUSE             | Arrestin-C OS=Mus musculus OX=10090 GN=Arr3 PE=1 SV=1                                                                            | MOUSE | 10 |
| 825 | 18.32 | 18.46 | 47.07 | 35.90 | sp Q91WU5 AS3MT_MOUSE            | Arsenite methyltransferase OS=Mus musculus OX=10090 GN=As3mt PE=1 SV=2                                                           | MOUSE | 10 |
| 826 | 18.3  | 18.36 | 50.66 | 50.66 | tr Q8BRQ9 Q8BRQ9_MOUSE           | Sidoreflexin OS=Mus musculus OX=10090 GN=Sfxn5 PE=1 SV=1                                                                         | MOUSE | 10 |
| 827 | 18.29 | 18.34 | 55.50 | 53.50 | tr Q14C38 Q14C38_MOUSE           | Transcription elongation factor A (SII)-like 5 OS=Mus musculus OX=10090 GN=Tceal5 PE=1 SV=1                                      | MOUSE | 13 |

|     |       |       |       |       |                                |                                                                                          |       |    |
|-----|-------|-------|-------|-------|--------------------------------|------------------------------------------------------------------------------------------|-------|----|
| 828 | 18.24 | 18.37 | 22.40 | 15.02 | sp Q3TCH7 CUL4A_MOUSE          | Cullin-4A OS=Mus musculus OX=10090 GN=Cul4a PE=1 SV=1                                    | MOUSE | 10 |
| 829 | 18.22 | 18.25 | 64.32 | 56.43 | tr Q3TUI9 Q3TUI9_MOUSE         | Proteasome subunit alpha type OS=Mus musculus OX=10090 GN=Psm5 PE=2 SV=1                 | MOUSE | 9  |
| 830 | 18.21 | 18.26 | 26.98 | 25.90 | tr Q542P2 Q542P2_MOUSE         | Uncharacterized protein OS=Mus musculus OX=10090 GN=Gpm6a PE=1 SV=1                      | MOUSE | 12 |
| 831 | 18.2  | 18.24 | 47.93 | 36.21 | sp Q8BH95 ECHM_MOUSE           | Enoyl-CoA hydratase, mitochondrial OS=Mus musculus OX=10090 GN=Echs1 PE=1 SV=1           | MOUSE | 9  |
| 832 | 18.18 | 18.8  | 50.81 | 34.59 | sp Q9CR16 PPID_MOUSE           | Peptidyl-prolyl cis-trans isomerase D OS=Mus musculus OX=10090 GN=Ppid PE=1 SV=3         | MOUSE | 13 |
| 833 | 18.17 | 18.24 | 44.96 | 23.51 | tr A0A0B4J1E2 A0A0B4J1E2_MOUSE | SNW domain-containing protein 1 OS=Mus musculus OX=10090 GN=Snw1 PE=1 SV=1               | MOUSE | 8  |
| 834 | 18.14 | 18.15 | 48.37 | 46.34 | sp Q9QUM9 PSA6_MOUSE           | Proteasome subunit alpha type-6 OS=Mus musculus OX=10090 GN=Psm6 PE=1 SV=1               | MOUSE | 13 |
| 835 | 18.13 | 18.24 | 44.35 | 29.71 | sp Q61655 DD19A_MOUSE          | ATP-dependent RNA helicase DDX19A OS=Mus musculus OX=10090 GN=Ddx19a PE=1 SV=2           | MOUSE | 11 |
| 836 | 18.12 | 18.22 | 32.66 | 32.66 | tr Q9CXX6 Q9CXX6_MOUSE         | Branched-chain-amino-acid aminotransferase OS=Mus musculus OX=10090 GN=Bcat1 PE=2 SV=1   | MOUSE | 11 |
| 837 | 18.12 | 18.16 | 57.53 | 51.37 | tr A4FUS1 A4FUS1_MOUSE         | Rps16 protein OS=Mus musculus OX=10090 GN=Rps16 PE=1 SV=1                                | MOUSE | 11 |
| 838 | 18.08 | 22.33 | 51.80 | 46.23 | sp Q9CX86 ROA0_MOUSE           | Heterogeneous nuclear ribonucleoprotein A0 OS=Mus musculus OX=10090 GN=Hnrnpa0 PE=1 SV=1 | MOUSE | 13 |
| 839 | 18.07 | 22.58 | 57.76 | 50.93 | sp Q99JR1 SFXN1_MOUSE          | Sideroflexin-1 OS=Mus musculus OX=10090 GN=Sfxn1 PE=1 SV=3                               | MOUSE | 13 |
| 840 | 18.07 | 18.16 | 35.50 | 27.99 | sp Q9JMA1 UBP14_MOUSE          | Ubiquitin carboxyl-terminal hydrolase 14 OS=Mus musculus OX=10090 GN=Usp14 PE=1 SV=3     | MOUSE | 10 |
| 841 | 18.06 | 18.12 | 45.30 | 36.59 | sp Q62189 SNRPA_MOUSE          | U1 small nuclear ribonucleoprotein A OS=Mus musculus OX=10090 GN=Snrpa PE=1 SV=3         | MOUSE | 12 |
| 842 | 18.04 | 30.96 | 62.65 | 61.18 | tr Q3U9V4 Q3U9V4_MOUSE         | WD_REPEATS_REGION domain-containing protein OS=Mus musculus OX=10090 GN=Gnb2 PE=1 SV=1   | MOUSE | 22 |
| 843 | 18.04 | 18.14 | 32.36 | 31.46 | tr Q3TML0 Q3TML0_MOUSE         | Protein disulfide-isomerase A6 OS=Mus musculus OX=10090 GN=Pdia6 PE=1 SV=1               | MOUSE | 10 |
| 844 | 18.03 | 18.1  | 79.12 | 63.74 | tr Q543P7 Q543P7_MOUSE         | Uncharacterized protein OS=Mus musculus OX=10090 GN=Arl3 PE=1 SV=1                       | MOUSE | 13 |

|     |       |       |       |       |                                |                                                                                                         |       |     |
|-----|-------|-------|-------|-------|--------------------------------|---------------------------------------------------------------------------------------------------------|-------|-----|
| 845 | 18.02 | 18.64 | 33.79 | 23.38 | tr Q9D094 Q9D094_MOUSE         | Histidine--tRNA ligase, cytoplasmic OS=Mus musculus<br>OX=10090 GN=Hars PE=2 SV=1                       | MOUSE | 11  |
| 846 | 18.01 | 18.08 | 44.93 | 43.01 | tr K3W4M4 K3W4M4_MOUSE         | ATP-dependent (S)-NAD(P)H-hydrate dehydratase<br>OS=Mus musculus OX=10090 GN=Naxd PE=1 SV=1             | MOUSE | 12  |
| 847 | 18    | 18    | 88.98 | 88.98 | tr Q3UNI8 Q3UNI8_MOUSE         | D-dopachrome tautomerase OS=Mus musculus OX=10090<br>GN=Ddt PE=1 SV=1                                   | MOUSE | 9   |
| 848 | 18    | 18    | 16.43 | 16.43 | sp P31650 S6A11_MOUSE          | Sodium- and chloride-dependent GABA transporter 3<br>OS=Mus musculus OX=10090 GN=Slc6a11 PE=1 SV=2      | MOUSE | 10  |
| 849 | 17.97 | 18.15 | 18.46 | 9.92  | tr Q8C943 Q8C943_MOUSE         | Anion exchange protein (Fragment) OS=Mus musculus<br>OX=10090 GN=Slc4a10 PE=2 SV=2                      | MOUSE | 10  |
| 850 | 17.95 | 17.95 | 65.10 | 64.58 | tr Q5EBQ6 Q5EBQ6_MOUSE         | 60S ribosomal protein L9 OS=Mus musculus OX=10090<br>GN=Rpl9 PE=1 SV=1                                  | MOUSE | 10  |
| 851 | 17.92 | 18.3  | 19.29 | 7.27  | tr A0A1S6GWJ7 A0A1S6GWJ7_MOUSE | Uncharacterized protein OS=Mus musculus OX=10090<br>GN=Pi4ka PE=2 SV=1                                  | MOUSE | 11  |
| 852 | 17.85 | 91.26 | 87.61 | 86.94 | sp Q9D6F9 TBB4A_MOUSE          | Tubulin beta-4A chain OS=Mus musculus OX=10090<br>GN=Tubb4a PE=1 SV=3                                   | MOUSE | 118 |
| 853 | 17.85 | 18.13 | 14.63 | 4.59  | sp Q9JLN9 MTOR_MOUSE           | Serine/threonine-protein kinase mTOR OS=Mus musculus<br>OX=10090 GN=Mtor PE=1 SV=2                      | MOUSE | 9   |
| 854 | 17.84 | 28.27 | 81.38 | 69.64 | tr A8IP69 A8IP69_MOUSE         | 14-3-3 protein gamma subtype OS=Mus musculus<br>OX=10090 GN=Ywhag PE=1 SV=1                             | MOUSE | 16  |
| 855 | 17.83 | 18.04 | 27.95 | 20.82 | tr F8WHW6 F8WHW6_MOUSE         | Phosphatidylinositol 4-phosphate 5-kinase type-1 gamma<br>OS=Mus musculus OX=10090 GN=Pip5k1c PE=1 SV=1 | MOUSE | 11  |
| 856 | 17.8  | 17.9  | 26.33 | 23.13 | tr D3YU17 D3YU17_MOUSE         | Nicalin OS=Mus musculus OX=10090 GN=Ndn PE=1 SV=1                                                       | MOUSE | 10  |
| 857 | 17.76 | 17.86 | 46.84 | 42.24 | sp O54984 GET3_MOUSE           | ATPase GET3 OS=Mus musculus OX=10090 GN=Get3 PE=1<br>SV=2                                               | MOUSE | 10  |
| 858 | 17.76 | 17.82 | 38.12 | 32.92 | tr A2AWI7 A2AWI7_MOUSE         | Endophilin-B2 OS=Mus musculus OX=10090 GN=Sh3glb2<br>PE=1 SV=1                                          | MOUSE | 9   |
| 859 | 17.75 | 27.52 | 41.31 | 38.03 | sp P43275 H11_MOUSE            | Histone H1.1 OS=Mus musculus OX=10090 GN=H1-1 PE=1<br>SV=2                                              | MOUSE | 29  |
| 860 | 17.75 | 17.78 | 57.77 | 52.43 | tr Q0PD38 Q0PD38_MOUSE         | Ras-related protein Rab-18 OS=Mus musculus OX=10090<br>GN=Rab18 PE=1 SV=1                               | MOUSE | 10  |
| 861 | 17.72 | 17.77 | 42.68 | 32.93 | sp Q924K1 AIPL1_MOUSE          | Aryl-hydrocarbon-interacting protein-like 1 OS=Mus<br>musculus OX=10090 GN=Aipl1 PE=2 SV=2              | MOUSE | 9   |

|     |       |       |       |       |                        |                                                                                                                                                             |       |    |
|-----|-------|-------|-------|-------|------------------------|-------------------------------------------------------------------------------------------------------------------------------------------------------------|-------|----|
| 862 | 17.71 | 17.79 | 40.75 | 32.60 | sp Q9D2G2 ODO2_MOUSE   | Dihydrolipoyllysine-residue succinyltransferase component of 2-oxoglutarate dehydrogenase complex, mitochondrial OS=Mus musculus OX=10090 GN=Dlst PE=1 SV=1 | MOUSE | 10 |
| 863 | 17.7  | 26.57 | 36.34 | 27.78 | tr Q5SVJ0 Q5SVJ0_MOUSE | Calcium/calmodulin-dependent protein kinase OS=Mus musculus OX=10090 GN=Camk2b PE=1 SV=1                                                                    | MOUSE | 20 |
| 864 | 17.69 | 23.61 | 16.24 | 11.47 | sp Q6R0H7 GNAS1_MOUSE  | Guanine nucleotide-binding protein G(s) subunit alpha isoforms XLas OS=Mus musculus OX=10090 GN=Gnas PE=1 SV=1                                              | MOUSE | 15 |
| 865 | 17.69 | 17.8  | 36.64 | 36.13 | tr Q9JJE1 Q9JJE1_MOUSE | Brain cDNA, clone MNCb-1208, similar to Mus musculus mitogen activated protein kinase kinase 1 (Map2k1), mRNA OS=Mus musculus OX=10090 GN=Map2k1 PE=2 SV=1  | MOUSE | 11 |
| 866 | 17.68 | 17.78 | 53.37 | 49.52 | tr Q497E9 Q497E9_MOUSE | 40S ribosomal protein S8 OS=Mus musculus OX=10090 GN=Rps8 PE=1 SV=1                                                                                         | MOUSE | 10 |
| 867 | 17.66 | 17.69 | 49.83 | 44.55 | tr Q3UA17 Q3UA17_MOUSE | Uncharacterized protein OS=Mus musculus OX=10090 GN=Mtch2 PE=2 SV=1                                                                                         | MOUSE | 9  |
| 868 | 17.64 | 17.7  | 48.03 | 47.24 | sp P11031 TCP4_MOUSE   | Activated RNA polymerase II transcriptional coactivator p15 OS=Mus musculus OX=10090 GN=Sub1 PE=1 SV=3                                                      | MOUSE | 9  |
| 869 | 17.62 | 18.73 | 41.36 | 41.36 | tr Q3UIT2 Q3UIT2_MOUSE | COP9 signalosome complex subunit 6 OS=Mus musculus OX=10090 GN=Cops6 PE=1 SV=1                                                                              | MOUSE | 10 |
| 870 | 17.6  | 17.65 | 46.90 | 37.97 | sp Q99J08 S14L2_MOUSE  | SEC14-like protein 2 OS=Mus musculus OX=10090 GN=Sec14l2 PE=1 SV=1                                                                                          | MOUSE | 9  |
| 871 | 17.6  | 17.64 | 41.75 | 33.51 | sp Q6ZWN5 RS9_MOUSE    | 40S ribosomal protein S9 OS=Mus musculus OX=10090 GN=Rps9 PE=1 SV=3                                                                                         | MOUSE | 10 |
| 872 | 17.59 | 17.86 | 20.79 | 10.60 | sp Q9JLI8 SART3_MOUSE  | Squamous cell carcinoma antigen recognized by T-cells 3 OS=Mus musculus OX=10090 GN=Sart3 PE=1 SV=1                                                         | MOUSE | 9  |
| 873 | 17.52 | 17.64 | 31.86 | 20.54 | tr Q6NZD2 Q6NZD2_MOUSE | Sorting nexin-1 OS=Mus musculus OX=10090 GN=Snx1 PE=1 SV=1                                                                                                  | MOUSE | 10 |
| 874 | 17.49 | 17.72 | 52.05 | 28.85 | sp Q3UYC0 PPM1H_MOUSE  | Protein phosphatase 1H OS=Mus musculus OX=10090 GN=Ppm1h PE=1 SV=1                                                                                          | MOUSE | 9  |
| 875 | 17.49 | 17.61 | 45.30 | 26.21 | sp P68181 KAPCB_MOUSE  | cAMP-dependent protein kinase catalytic subunit beta OS=Mus musculus OX=10090 GN=Prkacb PE=1 SV=2                                                           | MOUSE | 11 |

|     |       |       |       |       |                        |                                                                                                                            |       |    |
|-----|-------|-------|-------|-------|------------------------|----------------------------------------------------------------------------------------------------------------------------|-------|----|
| 876 | 17.48 | 17.83 | 24.47 | 14.63 | sp Q8CGY8 OGT1_MOUSE   | UDP-N-acetylglucosamine--peptide N-acetylglucosaminyltransferase 110 kDa subunit OS=Mus musculus OX=10090 GN=Ogt PE=1 SV=2 | MOUSE | 11 |
| 877 | 17.48 | 17.7  | 21.32 | 14.95 | sp Q8C050 KS6A5_MOUSE  | Ribosomal protein S6 kinase alpha-5 OS=Mus musculus OX=10090 GN=Rps6ka5 PE=1 SV=2                                          | MOUSE | 10 |
| 878 | 17.42 | 21.74 | 38.39 | 24.52 | sp Q8JZN7 MIRO2_MOUSE  | Mitochondrial Rho GTPase 2 OS=Mus musculus OX=10090 GN=Rhot2 PE=1 SV=1                                                     | MOUSE | 11 |
| 879 | 17.42 | 17.51 | 23.47 | 22.07 | tr Q3UK67 Q3UK67_MOUSE | Splicing factor 1 OS=Mus musculus OX=10090 GN=Sf1 PE=2 SV=1                                                                | MOUSE | 11 |
| 880 | 17.37 | 17.45 | 84.15 | 76.83 | sp Q5M8N0 CNRP1_MOUSE  | CB1 cannabinoid receptor-interacting protein 1 OS=Mus musculus OX=10090 GN=Cnrip1 PE=1 SV=1                                | MOUSE | 10 |
| 881 | 17.36 | 17.77 | 30.80 | 27.90 | tr A2RS68 A2RS68_MOUSE | U1 small nuclear ribonucleoprotein 70 kDa OS=Mus musculus OX=10090 GN=Snrnp70 PE=2 SV=1                                    | MOUSE | 10 |
| 882 | 17.35 | 17.62 | 37.88 | 26.84 | sp Q8C878 UBA3_MOUSE   | NEDD8-activating enzyme E1 catalytic subunit OS=Mus musculus OX=10090 GN=Uba3 PE=1 SV=2                                    | MOUSE | 9  |
| 883 | 17.28 | 17.44 | 24.44 | 17.31 | tr Q3TEX7 Q3TEX7_MOUSE | Dynamin-type G domain-containing protein OS=Mus musculus OX=10090 GN=Mfn2 PE=2 SV=1                                        | MOUSE | 10 |
| 884 | 17.28 | 17.36 | 53.21 | 44.53 | sp Q78IK4 MIC27_MOUSE  | MICOS complex subunit Mic27 OS=Mus musculus OX=10090 GN=Apool PE=1 SV=1                                                    | MOUSE | 9  |
| 885 | 17.27 | 17.31 | 44.68 | 44.68 | tr D3Z4T6 D3Z4T6_MOUSE | Neuronal growth regulator 1 OS=Mus musculus OX=10090 GN=Negr1 PE=1 SV=1                                                    | MOUSE | 10 |
| 886 | 17.26 | 17.31 | 62.37 | 54.12 | tr Q4FZE6 Q4FZE6_MOUSE | 40S ribosomal protein S7 OS=Mus musculus OX=10090 GN=Rps7 PE=2 SV=1                                                        | MOUSE | 9  |
| 887 | 17.23 | 17.28 | 23.51 | 18.76 | tr Q8BSI9 Q8BSI9_MOUSE | Cadherin-2 OS=Mus musculus OX=10090 GN=Cdh2 PE=2 SV=1                                                                      | MOUSE | 10 |
| 888 | 17.23 | 17.26 | 51.41 | 51.00 | sp Q9WV55 VAPA_MOUSE   | Vesicle-associated membrane protein-associated protein A OS=Mus musculus OX=10090 GN=Vapa PE=1 SV=2                        | MOUSE | 11 |
| 889 | 17.21 | 17.36 | 58.44 | 48.87 | sp Q8CAY6 THIC_MOUSE   | Acetyl-CoA acetyltransferase, cytosolic OS=Mus musculus OX=10090 GN=Acat2 PE=1 SV=2                                        | MOUSE | 9  |
| 890 | 17.21 | 17.28 | 49.34 | 44.74 | tr Q561N5 Q561N5_MOUSE | 40S ribosomal protein S18 OS=Mus musculus OX=10090 GN=Rps18 PE=2 SV=1                                                      | MOUSE | 11 |
| 891 | 17.2  | 17.31 | 73.24 | 64.79 | tr Q544F6 Q544F6_MOUSE | Cotl1 protein OS=Mus musculus OX=10090 GN=Cotl1 PE=1 SV=1                                                                  | MOUSE | 12 |

|     |       |       |       |       |                                |                                                                                                                       |       |    |
|-----|-------|-------|-------|-------|--------------------------------|-----------------------------------------------------------------------------------------------------------------------|-------|----|
| 892 | 17.18 | 25.34 | 41.35 | 41.35 | sp P31324 KAP3_MOUSE           | cAMP-dependent protein kinase type II-beta regulatory subunit OS=Mus musculus OX=10090 GN=Prkar2b PE=1 SV=3           | MOUSE | 13 |
| 893 | 17.18 | 17.26 | 66.67 | 37.22 | tr A0A0A1HAM8 A0A0A1HAM8_MOUSE | 80K protein OS=Mus musculus OX=10090 GN=Marcks PE=2 SV=1                                                              | MOUSE | 11 |
| 894 | 17.13 | 17.25 | 40.21 | 31.44 | sp Q08288 LYAR_MOUSE           | Cell growth-regulating nucleolar protein OS=Mus musculus OX=10090 GN=Lyar PE=1 SV=2                                   | MOUSE | 9  |
| 895 | 17.13 | 17.23 | 37.84 | 27.52 | sp Q62418 DBNL_MOUSE           | Drebrin-like protein OS=Mus musculus OX=10090 GN=Dbnl PE=1 SV=2                                                       | MOUSE | 9  |
| 896 | 17.09 | 17.2  | 48.90 | 32.87 | tr Q3U5N4 Q3U5N4_MOUSE         | Uncharacterized protein OS=Mus musculus OX=10090 GN=Adprh PE=1 SV=1                                                   | MOUSE | 8  |
| 897 | 17.07 | 17.19 | 43.20 | 33.33 | tr D3YXC2 D3YXC2_MOUSE         | Mitochondrial carrier homolog 1 (Fragment) OS=Mus musculus OX=10090 GN=Mtch1 PE=1 SV=2                                | MOUSE | 10 |
| 898 | 17.03 | 17.08 | 40.80 | 39.88 | sp Q8C0M9 ASGL1_MOUSE          | Isoaspartyl peptidase/L-asparaginase OS=Mus musculus OX=10090 GN=Asrgl1 PE=1 SV=1                                     | MOUSE | 11 |
| 899 | 17.01 | 17.1  | 38.82 | 32.94 | sp P57784 RU2A_MOUSE           | U2 small nuclear ribonucleoprotein A' OS=Mus musculus OX=10090 GN=Snrpa1 PE=1 SV=2                                    | MOUSE | 11 |
| 900 | 17    | 17.03 | 63.52 | 54.10 | tr Q4VA29 Q4VA29_MOUSE         | RNA transcription, translation and transport factor protein OS=Mus musculus OX=10090 GN=Rtraf PE=1 SV=1               | MOUSE | 9  |
| 901 | 16.97 | 17.21 | 24.07 | 15.40 | tr Q91WD8 Q91WD8_MOUSE         | Solute carrier family 24 (Sodium/potassium/calcium exchanger), member 1 OS=Mus musculus OX=10090 GN=Slc24a1 PE=2 SV=1 | MOUSE | 10 |
| 902 | 16.93 | 17.17 | 55.59 | 40.78 | sp Q6PE01 SNR40_MOUSE          | U5 small nuclear ribonucleoprotein 40 kDa protein OS=Mus musculus OX=10090 GN=Snrnp40 PE=1 SV=1                       | MOUSE | 8  |
| 903 | 16.93 | 17.05 | 37.59 | 28.67 | sp Q9D7N9 APMAP_MOUSE          | Adipocyte plasma membrane-associated protein OS=Mus musculus OX=10090 GN=Apmmap PE=1 SV=1                             | MOUSE | 9  |
| 904 | 16.88 | 17.07 | 34.59 | 24.91 | tr A0A3B2WCL5 A0A3B2WCL5_MOUSE | Ran-binding protein 3 OS=Mus musculus OX=10090 GN=Ranbp3 PE=1 SV=1                                                    | MOUSE | 11 |
| 905 | 16.88 | 17.05 | 36.38 | 16.92 | sp O08582 GTPB1_MOUSE          | GTP-binding protein 1 OS=Mus musculus OX=10090 GN=Gtpbp1 PE=1 SV=2                                                    | MOUSE | 10 |
| 906 | 16.82 | 28.89 | 41.50 | 25.60 | sp Q61301-3 CTNA2_MOUSE        | Isoform 3 of Catenin alpha-2 OS=Mus musculus OX=10090 GN=Ctnna2                                                       | MOUSE | 16 |



|     |       |       |       |       |                        |                                                                                                   |       |    |
|-----|-------|-------|-------|-------|------------------------|---------------------------------------------------------------------------------------------------|-------|----|
| 907 | 16.81 | 16.9  | 67.68 | 50.84 | sp Q91VH6 MEMO1_MOUSE  | Protein MEMO1 OS=Mus musculus OX=10090 GN=Memo1 PE=1 SV=1                                         | MOUSE | 9  |
| 908 | 16.81 | 16.89 | 46.62 | 39.53 | tr Q3U3F6 Q3U3F6_MOUSE | RRM domain-containing protein OS=Mus musculus OX=10090 GN=Raly PE=2 SV=1                          | MOUSE | 9  |
| 909 | 16.74 | 17    | 24.87 | 15.31 | tr A2AWT5 A2AWT5_MOUSE | Nucleolar transcription factor 1 OS=Mus musculus OX=10090 GN=Ubtf PE=1 SV=1                       | MOUSE | 12 |
| 910 | 16.71 | 16.83 | 64.86 | 58.56 | tr Q9CQB4 Q9CQB4_MOUSE | Cytochrome b-c1 complex subunit 7 OS=Mus musculus OX=10090 GN=Uqcrb PE=1 SV=1                     | MOUSE | 10 |
| 911 | 16.66 | 16.73 | 30.69 | 22.77 | tr Q571F9 Q571F9_MOUSE | MKIAA4115 protein (Fragment) OS=Mus musculus OX=10090 GN=G3bp1 PE=2 SV=1                          | MOUSE | 10 |
| 912 | 16.63 | 28.27 | 80.89 | 70.64 | tr B2M1R7 B2M1R7_MOUSE | Poly(rC)-binding protein 2 OS=Mus musculus OX=10090 GN=Pcbp2 PE=1 SV=1                            | MOUSE | 18 |
| 913 | 16.63 | 16.66 | 46.90 | 35.86 | sp Q9CZX8 RS19_MOUSE   | 40S ribosomal protein S19 OS=Mus musculus OX=10090 GN=Rps19 PE=1 SV=3                             | MOUSE | 8  |
| 914 | 16.6  | 16.8  | 51.18 | 41.41 | sp Q6PE15 ABHDA_MOUSE  | Palmitoyl-protein thioesterase ABHD10, mitochondrial OS=Mus musculus OX=10090 GN=Abhd10 PE=1 SV=1 | MOUSE | 12 |
| 915 | 16.58 | 16.64 | 67.41 | 66.67 | tr Q58EU7 Q58EU7_MOUSE | Rbp1 protein OS=Mus musculus OX=10090 GN=Rbp1 PE=1 SV=1                                           | MOUSE | 12 |
| 916 | 16.57 | 18.92 | 20.50 | 14.84 | tr Q3UDQ7 Q3UDQ7_MOUSE | AAA domain-containing protein OS=Mus musculus OX=10090 GN=Afg3l2 PE=2 SV=1                        | MOUSE | 11 |
| 917 | 16.56 | 16.69 | 82.71 | 46.62 | sp Q91ZZ3 SYUB_MOUSE   | Beta-synuclein OS=Mus musculus OX=10090 GN=Sncb PE=1 SV=1                                         | MOUSE | 11 |
| 918 | 16.56 | 16.58 | 47.67 | 44.77 | sp P60824 CIRBP_MOUSE  | Cold-inducible RNA-binding protein OS=Mus musculus OX=10090 GN=Cirbp PE=1 SV=1                    | MOUSE | 9  |
| 919 | 16.55 | 16.79 | 18.67 | 12.48 | tr Q8CBB7 Q8CBB7_MOUSE | AP-1 complex subunit gamma OS=Mus musculus OX=10090 GN=Ap1g1 PE=1 SV=1                            | MOUSE | 9  |
| 920 | 16.53 | 16.61 | 74.19 | 69.35 | tr Q80YU9 Q80YU9_MOUSE | Retinoblastoma binding protein 9 OS=Mus musculus OX=10090 GN=Rbbp9 PE=2 SV=1                      | MOUSE | 10 |
| 921 | 16.51 | 16.59 | 31.53 | 20.91 | tr Q548L6 Q548L6_MOUSE | Glutamate decarboxylase OS=Mus musculus OX=10090 GN=Gad1 PE=1 SV=1                                | MOUSE | 10 |
| 922 | 16.48 | 16.67 | 20.16 | 10.57 | tr V9GXQ9 V9GXQ9_MOUSE | Phosphoinositide phospholipase C OS=Mus musculus OX=10090 GN=Plcb4 PE=1 SV=1                      | MOUSE | 9  |
| 923 | 16.48 | 16.61 | 22.19 | 14.70 | sp Q9CWF6 BBS2_MOUSE   | Bardet-Biedl syndrome 2 protein homolog OS=Mus musculus OX=10090 GN=Bbs2 PE=1 SV=1                | MOUSE | 9  |

|     |       |       |       |       |                         |                                                                                                                 |       |    |
|-----|-------|-------|-------|-------|-------------------------|-----------------------------------------------------------------------------------------------------------------|-------|----|
| 924 | 16.48 | 16.55 | 57.09 | 41.87 | tr Q543K9 Q543K9_MOUSE  | Purine nucleoside phosphorylase OS=Mus musculus<br>OX=10090 GN=Pnp PE=1 SV=1                                    | MOUSE | 8  |
| 925 | 16.48 | 16.5  | 55.23 | 51.74 | sp Q9DCJ5 NDUA8_MOUSE   | NADH dehydrogenase [ubiquinone] 1 alpha subcomplex<br>subunit 8 OS=Mus musculus OX=10090 GN=Ndufa8 PE=1<br>SV=3 | MOUSE | 9  |
| 926 | 16.47 | 16.49 | 22.45 | 19.56 | tr H3BJW3 H3BJW3_MOUSE  | Cleavage and polyadenylation specificity factor subunit 6<br>OS=Mus musculus OX=10090 GN=Cpsf6 PE=1 SV=1        | MOUSE | 8  |
| 927 | 16.46 | 16.58 | 38.60 | 25.80 | tr Q9JKY7 Q9JKY7_MOUSE  | Cytochrome P450 CYP2D22 OS=Mus musculus OX=10090<br>GN=Cyp2d22 PE=1 SV=1                                        | MOUSE | 9  |
| 928 | 16.44 | 16.73 | 32.01 | 17.61 | sp O08795-2 GLU2B_MOUSE | Isoform 2 of Glucosidase 2 subunit beta OS=Mus musculus<br>OX=10090 GN=Prkcsh                                   | MOUSE | 9  |
| 929 | 16.44 | 16.56 | 41.05 | 30.53 | sp Q9JK81 MYG1_MOUSE    | MYG1 exonuclease OS=Mus musculus OX=10090<br>GN=Myg1 PE=1 SV=1                                                  | MOUSE | 10 |
| 930 | 16.43 | 16.52 | 42.12 | 35.96 | tr Q543F6 Q543F6_MOUSE  | Uncharacterized protein OS=Mus musculus OX=10090<br>GN=Cdk5 PE=1 SV=1                                           | MOUSE | 9  |
| 931 | 16.43 | 16.5  | 23.66 | 16.83 | sp Q64737 PUR2_MOUSE    | Trifunctional purine biosynthetic protein adenosine-3<br>OS=Mus musculus OX=10090 GN=Gart PE=1 SV=3             | MOUSE | 9  |
| 932 | 16.42 | 16.44 | 46.69 | 44.75 | sp P20108 PRDX3_MOUSE   | Thioredoxin-dependent peroxide reductase, mitochondrial<br>OS=Mus musculus OX=10090 GN=Prdx3 PE=1 SV=1          | MOUSE | 10 |
| 933 | 16.39 | 16.55 | 23.29 | 8.31  | sp Q8K010 OPLA_MOUSE    | 5-oxoprolinase OS=Mus musculus OX=10090 GN=Oplah<br>PE=1 SV=1                                                   | MOUSE | 7  |
| 934 | 16.38 | 22.66 | 53.02 | 43.72 | sp O88712-2 CTBP1_MOUSE | Isoform 2 of C-terminal-binding protein 1 OS=Mus<br>musculus OX=10090 GN=Ctbp1                                  | MOUSE | 12 |
| 935 | 16.38 | 18.43 | 51.32 | 38.16 | tr Q91Z50 Q91Z50_MOUSE  | Flap endonuclease 1 OS=Mus musculus OX=10090<br>GN=Fen1 PE=1 SV=1                                               | MOUSE | 9  |
| 936 | 16.36 | 18.49 | 51.77 | 46.45 | sp Q920Q6-3 MSI2H_MOUSE | Isoform 3 of RNA-binding protein Musashi homolog 2<br>OS=Mus musculus OX=10090 GN=Msi2                          | MOUSE | 10 |
| 937 | 16.32 | 16.39 | 47.81 | 38.32 | sp Q9CR68 UCRI_MOUSE    | Cytochrome b-c1 complex subunit Rieske, mitochondrial<br>OS=Mus musculus OX=10090 GN=Uqcrrf1 PE=1 SV=1          | MOUSE | 9  |
| 938 | 16.3  | 32.43 | 20.85 | 15.97 | sp Q5SDA5 GUC2F_MOUSE   | Retinal guanylyl cyclase 2 OS=Mus musculus OX=10090<br>GN=Gucy2f PE=1 SV=1                                      | MOUSE | 16 |
| 939 | 16.3  | 20.59 | 48.17 | 38.21 | sp Q9Z130 HNRDL_MOUSE   | Heterogeneous nuclear ribonucleoprotein D-like OS=Mus<br>musculus OX=10090 GN=Hnrnpdl PE=1 SV=1                 | MOUSE | 12 |

|     |       |       |       |       |                                |                                                                                                |       |    |
|-----|-------|-------|-------|-------|--------------------------------|------------------------------------------------------------------------------------------------|-------|----|
| 940 | 16.27 | 16.36 | 34.41 | 28.93 | tr Q5RKP0 Q5RKP0_MOUSE         | Vat1 protein (Fragment) OS=Mus musculus OX=10090 GN=Vat1 PE=2 SV=1                             | MOUSE | 9  |
| 941 | 16.23 | 16.32 | 85.35 | 63.13 | tr Q60I30 Q60I30_MOUSE         | Inosine triphosphate pyrophosphatase OS=Mus musculus OX=10090 GN=Itpa PE=1 SV=1                | MOUSE | 9  |
| 942 | 16.21 | 18.54 | 29.10 | 13.29 | tr Q8BTX6 Q8BTX6_MOUSE         | Uncharacterized protein (Fragment) OS=Mus musculus OX=10090 GN=Mtrex PE=2 SV=1                 | MOUSE | 9  |
| 943 | 16.21 | 16.66 | 8.42  | 3.93  | sp Q9ERU9 RBP2_MOUSE           | E3 SUMO-protein ligase RanBP2 OS=Mus musculus OX=10090 GN=Ranbp2 PE=1 SV=2                     | MOUSE | 10 |
| 944 | 16.2  | 16.26 | 61.67 | 52.08 | tr Q6RI64 Q6RI64_MOUSE         | Proteasome subunit beta OS=Mus musculus OX=10090 GN=Psm1 PE=1 SV=1                             | MOUSE | 9  |
| 945 | 16.17 | 16.26 | 37.30 | 29.60 | tr Q505L1 Q505L1_MOUSE         | Actl6a protein OS=Mus musculus OX=10090 GN=Actl6a PE=1 SV=1                                    | MOUSE | 8  |
| 946 | 16.15 | 16.21 | 66.88 | 47.13 | sp Q61425 HCDH_MOUSE           | Hydroxyacyl-coenzyme A dehydrogenase, mitochondrial OS=Mus musculus OX=10090 GN=Hadh PE=1 SV=2 | MOUSE | 8  |
| 947 | 16.14 | 16.23 | 32.05 | 15.56 | tr Q05DV1 Q05DV1_MOUSE         | NADPH-hemoprotein reductase OS=Mus musculus OX=10090 GN=Por PE=1 SV=1                          | MOUSE | 9  |
| 948 | 16.14 | 16.18 | 78.57 | 78.57 | sp P70349 HINT1_MOUSE          | Histidine triad nucleotide-binding protein 1 OS=Mus musculus OX=10090 GN=Hint1 PE=1 SV=3       | MOUSE | 9  |
| 949 | 16.12 | 18.4  | 60.58 | 51.92 | tr Q0PD53 Q0PD53_MOUSE         | Rab6B OS=Mus musculus OX=10090 GN=Rab6b PE=1 SV=1                                              | MOUSE | 10 |
| 950 | 16.09 | 16.25 | 25.43 | 18.52 | tr A0A5F8MPZ2 A0A5F8MPZ2_MOUSE | Kinesin light chain OS=Mus musculus OX=10090 GN=Klc1 PE=1 SV=1                                 | MOUSE | 9  |
| 951 | 16.05 | 16.06 | 24.91 | 24.91 | sp Q8BGN8-2 SYNPR_MOUSE        | Isoform 2 of Synaptoporin OS=Mus musculus OX=10090 GN=Synpr                                    | MOUSE | 9  |
| 952 | 16.02 | 16.13 | 29.11 | 17.84 | sp Q3UDE2 TTL12_MOUSE          | Tubulin--tyrosine ligase-like protein 12 OS=Mus musculus OX=10090 GN=Ttl12 PE=1 SV=1           | MOUSE | 8  |
| 953 | 16.02 | 16.03 | 18.23 | 18.23 | tr Q8C7W8 Q8C7W8_MOUSE         | Amino acid transporter OS=Mus musculus OX=10090 GN=Slc1a3 PE=2 SV=1                            | MOUSE | 12 |
| 954 | 16    | 18    | 50.26 | 49.74 | sp P60766 CDC42_MOUSE          | Cell division control protein 42 homolog OS=Mus musculus OX=10090 GN=Cdc42 PE=1 SV=2           | MOUSE | 10 |
| 955 | 15.94 | 16.19 | 25.12 | 14.06 | sp Q8CH09 SUGP2_MOUSE          | SURP and G-patch domain-containing protein 2 OS=Mus musculus OX=10090 GN=Sugp2 PE=1 SV=2       | MOUSE | 9  |
| 956 | 15.93 | 24.81 | 34.82 | 22.96 | tr Q3UAT9 Q3UAT9_MOUSE         | Inosine-5'-monophosphate dehydrogenase OS=Mus musculus OX=10090 GN=Impdh2 PE=1 SV=1            | MOUSE | 12 |

|     |       |       |       |       |                                |                                                                                                           |       |    |
|-----|-------|-------|-------|-------|--------------------------------|-----------------------------------------------------------------------------------------------------------|-------|----|
| 957 | 15.92 | 16.28 | 31.48 | 16.90 | tr Q7TQD1 Q7TQD1_MOUSE         | Ubiquitinyl hydrolase 1 OS=Mus musculus OX=10090 GN=Tnfaip3 PE=2 SV=1                                     | MOUSE | 10 |
| 958 | 15.84 | 15.92 | 27.18 | 23.12 | tr Q8C2E6 Q8C2E6_MOUSE         | Monocarboxylate transporter 1 OS=Mus musculus OX=10090 GN=Slc16a1 PE=2 SV=1                               | MOUSE | 8  |
| 959 | 15.84 | 15.92 | 44.07 | 24.41 | sp Q9CY64 BIEA_MOUSE           | Biliverdin reductase A OS=Mus musculus OX=10090 GN=Blvra PE=1 SV=1                                        | MOUSE | 7  |
| 960 | 15.81 | 21.49 | 46.76 | 32.64 | tr A0A0J9YUL3 A0A0J9YUL3_MOUSE | Septin OS=Mus musculus OX=10090 GN=Septin11 PE=1 SV=1                                                     | MOUSE | 11 |
| 961 | 15.78 | 16.26 | 27.40 | 23.12 | tr Q3URK9 Q3URK9_MOUSE         | Uncharacterized protein OS=Mus musculus OX=10090 GN=Trim2 PE=2 SV=1                                       | MOUSE | 13 |
| 962 | 15.75 | 15.78 | 52.85 | 47.91 | tr Q543N3 Q543N3_MOUSE         | LIM and SH3 domain protein 1 OS=Mus musculus OX=10090 GN=Lasp1 PE=1 SV=1                                  | MOUSE | 12 |
| 963 | 15.74 | 15.87 | 15.79 | 5.80  | sp A2A5R2 BIG2_MOUSE           | Brefeldin A-inhibited guanine nucleotide-exchange protein 2 OS=Mus musculus OX=10090 GN=Arfgef2 PE=1 SV=1 | MOUSE | 8  |
| 964 | 15.74 | 15.78 | 54.63 | 54.63 | sp Q91WS0 CISD1_MOUSE          | CDGSH iron-sulfur domain-containing protein 1 OS=Mus musculus OX=10090 GN=Cisd1 PE=1 SV=1                 | MOUSE | 8  |
| 965 | 15.72 | 16.07 | 13.46 | 7.93  | sp B2RXS4 PLXB2_MOUSE          | Plexin-B2 OS=Mus musculus OX=10090 GN=Plxnb2 PE=1 SV=1                                                    | MOUSE | 9  |
| 966 | 15.71 | 15.82 | 29.87 | 18.12 | tr Q3TMW7 Q3TMW7_MOUSE         | Uncharacterized protein OS=Mus musculus OX=10090 GN=Glmn PE=2 SV=1                                        | MOUSE | 10 |
| 967 | 15.67 | 15.75 | 41.62 | 31.62 | tr Q9CY29 Q9CY29_MOUSE         | 26S proteasome non-ATPase regulatory subunit 4 OS=Mus musculus OX=10090 GN=Psm4 PE=2 SV=1                 | MOUSE | 9  |
| 968 | 15.66 | 15.8  | 23.71 | 14.43 | tr A3KG93 A3KG93_MOUSE         | Lysine-specific histone demethylase OS=Mus musculus OX=10090 GN=Kdm1a PE=1 SV=1                           | MOUSE | 9  |
| 969 | 15.66 | 15.75 | 34.31 | 26.64 | sp O70194 EIF3D_MOUSE          | Eukaryotic translation initiation factor 3 subunit D OS=Mus musculus OX=10090 GN=Eif3d PE=1 SV=2          | MOUSE | 11 |
| 970 | 15.63 | 15.73 | 45.71 | 31.43 | tr B2RUC7 B2RUC7_MOUSE         | Serine/threonine kinase receptor associated protein OS=Mus musculus OX=10090 GN=Strap PE=1 SV=1           | MOUSE | 8  |
| 971 | 15.62 | 15.71 | 16.64 | 14.63 | sp P32020 SCP2_MOUSE           | Sterol carrier protein 2 OS=Mus musculus OX=10090 GN=Scp2 PE=1 SV=3                                       | MOUSE | 10 |
| 972 | 15.58 | 15.74 | 49.28 | 43.54 | tr B7ZWI2 B7ZWI2_MOUSE         | 1110005A23Rik protein OS=Mus musculus OX=10090 GN=Sarnp PE=2 SV=1                                         | MOUSE | 9  |

|     |       |       |       |       |                        |                                                                                                          |       |    |
|-----|-------|-------|-------|-------|------------------------|----------------------------------------------------------------------------------------------------------|-------|----|
| 973 | 15.56 | 15.66 | 45.70 | 41.72 | tr O70569 O70569_MOUSE | Ribosomal protein S14 OS=Mus musculus OX=10090 GN=rps14 PE=3 SV=1                                        | MOUSE | 8  |
| 974 | 15.53 | 15.61 | 70.63 | 66.87 | sp Q80WM3 CPLX4_MOUSE  | Complexin-4 OS=Mus musculus OX=10090 GN=Cplx4 PE=1 SV=2                                                  | MOUSE | 8  |
| 975 | 15.52 | 15.57 | 54.02 | 34.10 | sp Q9R1P0 PSA4_MOUSE   | Proteasome subunit alpha type-4 OS=Mus musculus OX=10090 GN=Psm4 PE=1 SV=1                               | MOUSE | 8  |
| 976 | 15.51 | 15.6  | 33.26 | 25.05 | tr Q3TKP3 Q3TKP3_MOUSE | Ataxin-10 OS=Mus musculus OX=10090 GN=Atxn10 PE=2 SV=1                                                   | MOUSE | 9  |
| 977 | 15.49 | 15.9  | 21.27 | 16.26 | tr D3YWN7 D3YWN7_MOUSE | Ensconsin OS=Mus musculus OX=10090 GN=Map7 PE=1 SV=2                                                     | MOUSE | 9  |
| 978 | 15.48 | 15.58 | 65.36 | 65.36 | sp Q9CQJ8 NDUB9_MOUSE  | NADH dehydrogenase [ubiquinone] 1 beta subcomplex subunit 9 OS=Mus musculus OX=10090 GN=Ndufb9 PE=1 SV=3 | MOUSE | 10 |
| 979 | 15.47 | 15.54 | 47.65 | 43.68 | sp Q9EQU5-2 SET_MOUSE  | Isoform 2 of Protein SET OS=Mus musculus OX=10090 GN=Set                                                 | MOUSE | 9  |
| 980 | 15.46 | 15.65 | 68.67 | 36.14 | tr Q99M52 Q99M52_MOUSE | Sorting nexin 12 OS=Mus musculus OX=10090 GN=Snx12 PE=2 SV=1                                             | MOUSE | 8  |
| 981 | 15.44 | 15.54 | 55.83 | 50.31 | tr B0QZN5 B0QZN5_MOUSE | Synaptobrevin-2 OS=Mus musculus OX=10090 GN=Vamp2 PE=1 SV=1                                              | MOUSE | 12 |
| 982 | 15.42 | 17.04 | 37.33 | 24.89 | tr Q8R3X4 Q8R3X4_MOUSE | Timm44 protein (Fragment) OS=Mus musculus OX=10090 GN=Timm44 PE=2 SV=1                                   | MOUSE | 11 |
| 983 | 15.41 | 15.51 | 41.41 | 26.52 | sp Q9CZ30 OLA1_MOUSE   | Obg-like ATPase 1 OS=Mus musculus OX=10090 GN=Ola1 PE=1 SV=1                                             | MOUSE | 8  |
| 984 | 15.37 | 15.39 | 36.20 | 32.94 | sp Q9CQM9 GLRX3_MOUSE  | Glutaredoxin-3 OS=Mus musculus OX=10090 GN=Glr3 PE=1 SV=1                                                | MOUSE | 9  |
| 985 | 15.31 | 15.56 | 19.81 | 9.71  | tr B1AS46 B1AS46_MOUSE | Zinc finger protein castor homolog 1 OS=Mus musculus OX=10090 GN=Casz1 PE=1 SV=1                         | MOUSE | 9  |
| 986 | 15.31 | 15.41 | 50.72 | 45.65 | tr Q5D098 Q5D098_MOUSE | Proteasome subunit beta (Fragment) OS=Mus musculus OX=10090 GN=Psm7 PE=2 SV=1                            | MOUSE | 11 |
| 987 | 15.27 | 15.35 | 55.30 | 38.11 | sp Q9JM96 BORG4_MOUSE  | Cdc42 effector protein 4 OS=Mus musculus OX=10090 GN=Cdc42ep4 PE=1 SV=1                                  | MOUSE | 9  |
| 988 | 15.27 | 15.32 | 38.94 | 33.04 | tr Q3TVS6 Q3TVS6_MOUSE | Cathepsin B OS=Mus musculus OX=10090 GN=Ctsb PE=2 SV=1                                                   | MOUSE | 9  |

|      |       |       |       |       |                                |                                                                                                             |       |    |
|------|-------|-------|-------|-------|--------------------------------|-------------------------------------------------------------------------------------------------------------|-------|----|
| 989  | 15.26 | 15.46 | 22.64 | 11.27 | tr G3X956 G3X956_MOUSE         | FACT complex subunit OS=Mus musculus OX=10090 GN=Supt16 PE=1 SV=1                                           | MOUSE | 10 |
| 990  | 15.26 | 15.31 | 32.48 | 26.75 | tr A0A0R4J023 A0A0R4J023_MOUSE | Methylglutaconyl-CoA hydratase, mitochondrial OS=Mus musculus OX=10090 GN=Auh PE=1 SV=1                     | MOUSE | 9  |
| 991  | 15.2  | 15.39 | 31.88 | 12.08 | tr Q80VM5 Q80VM5_MOUSE         | Dipeptidyl aminopeptidase-like protein 6 OS=Mus musculus OX=10090 GN=Dpp6 PE=1 SV=1                         | MOUSE | 7  |
| 992  | 15.16 | 15.2  | 81.63 | 63.95 | tr Q8BME2 Q8BME2_MOUSE         | NADH dehydrogenase [ubiquinone] 1 alpha subcomplex subunit 12 OS=Mus musculus OX=10090 GN=Ndufa12 PE=2 SV=1 | MOUSE | 8  |
| 993  | 15.13 | 15.16 | 26.24 | 24.03 | sp Q8K2C9 HACD3_MOUSE          | Very-long-chain (3R)-3-hydroxyacyl-CoA dehydratase 3 OS=Mus musculus OX=10090 GN=Hacd3 PE=1 SV=2            | MOUSE | 10 |
| 994  | 15.13 | 15.16 | 35.52 | 28.21 | sp Q8BWT1 THIM_MOUSE           | 3-ketoacyl-CoA thiolase, mitochondrial OS=Mus musculus OX=10090 GN=Acaa2 PE=1 SV=3                          | MOUSE | 8  |
| 995  | 15.12 | 15.2  | 36.87 | 33.41 | tr Q6PFB2 Q6PFB2_MOUSE         | Rcc1 protein OS=Mus musculus OX=10090 GN=Rcc1 PE=1 SV=1                                                     | MOUSE | 8  |
| 996  | 15.02 | 15.08 | 47.94 | 36.08 | tr Q8VCV2 Q8VCV2_MOUSE         | N-myc downstream-regulated gene 3 protein OS=Mus musculus OX=10090 GN=Ndr3 PE=1 SV=1                        | MOUSE | 8  |
| 997  | 14.92 | 15.02 | 31.66 | 30.34 | sp Q61081 CDC37_MOUSE          | Hsp90 co-chaperone Cdc37 OS=Mus musculus OX=10090 GN=Cdc37 PE=1 SV=1                                        | MOUSE | 9  |
| 998  | 14.92 | 14.94 | 51.20 | 51.20 | tr Q9DAB3 Q9DAB3_MOUSE         | Uncharacterized protein OS=Mus musculus OX=10090 GN=Arl8b PE=2 SV=1                                         | MOUSE | 8  |
| 999  | 14.88 | 15.02 | 28.71 | 18.39 | sp Q8K3H0 DP13A_MOUSE          | DCC-interacting protein 13-alpha OS=Mus musculus OX=10090 GN=Appl1 PE=1 SV=1                                | MOUSE | 8  |
| 1000 | 14.86 | 14.9  | 17.28 | 14.84 | tr Q3U2J2 Q3U2J2_MOUSE         | Glucose transporter type 1, erythrocyte/brain OS=Mus musculus OX=10090 GN=Slc2a1 PE=2 SV=1                  | MOUSE | 10 |
| 1001 | 14.84 | 15.43 | 37.27 | 30.34 | tr Q3UK27 Q3UK27_MOUSE         | NEDD8-activating enzyme E1 regulatory subunit OS=Mus musculus OX=10090 GN=Nae1 PE=1 SV=1                    | MOUSE | 10 |
| 1002 | 14.84 | 14.89 | 15.51 | 12.13 | tr Q8JZN2 Q8JZN2_MOUSE         | Cold shock domain-containing protein E1 OS=Mus musculus OX=10090 GN=Csd1 PE=1 SV=1                          | MOUSE | 8  |
| 1003 | 14.82 | 14.9  | 20.37 | 16.50 | tr Q542V3 Q542V3_MOUSE         | Serine/arginine-rich-splicing factor 4 OS=Mus musculus OX=10090 GN=Srsf4 PE=1 SV=1                          | MOUSE | 9  |
| 1004 | 14.81 | 14.95 | 75.39 | 54.45 | tr Q4W4C9 Q4W4C9_MOUSE         | Visinin-like protein 1 OS=Mus musculus OX=10090 GN=Vsnl1 PE=1 SV=1                                          | MOUSE | 9  |

|      |       |       |       |       |                        |                                                                                                                           |       |    |
|------|-------|-------|-------|-------|------------------------|---------------------------------------------------------------------------------------------------------------------------|-------|----|
| 1005 | 14.77 | 14.88 | 34.16 | 25.69 | tr Q3UMP4 Q3UMP4_MOUSE | Plasminogen activator inhibitor 1 RNA-binding protein OS=Mus musculus OX=10090 GN=Serbp1 PE=1 SV=1                        | MOUSE | 7  |
| 1006 | 14.76 | 15.33 | 75.00 | 65.95 | tr Q3TJC2 Q3TJC2_MOUSE | SGNH_hydro domain-containing protein OS=Mus musculus OX=10090 GN=Pafah1b3 PE=1 SV=1                                       | MOUSE | 10 |
| 1007 | 14.76 | 15.31 | 22.18 | 12.19 | tr B7ZW94 B7ZW94_MOUSE | Family with sequence similarity 120, member C OS=Mus musculus OX=10090 GN=Fam120c PE=2 SV=1                               | MOUSE | 9  |
| 1008 | 14.74 | 15.46 | 16.92 | 13.30 | sp O88704 HCN1_MOUSE   | Potassium/sodium hyperpolarization-activated cyclic nucleotide-gated channel 1 OS=Mus musculus OX=10090 GN=Hcn1 PE=1 SV=1 | MOUSE | 8  |
| 1009 | 14.72 | 14.79 | 22.05 | 15.41 | tr Q8C7F9 Q8C7F9_MOUSE | Transmembrane 9 superfamily member OS=Mus musculus OX=10090 GN=Tm9sf2 PE=2 SV=1                                           | MOUSE | 8  |
| 1010 | 14.68 | 14.73 | 50.35 | 50.35 | tr Q8BT90 Q8BT90_MOUSE | 40S ribosomal protein S17 (Fragment) OS=Mus musculus OX=10090 GN=Rps17 PE=2 SV=1                                          | MOUSE | 9  |
| 1011 | 14.64 | 14.68 | 27.60 | 24.68 | sp Q9CY27 TECR_MOUSE   | Very-long-chain enoyl-CoA reductase OS=Mus musculus OX=10090 GN=Tecr PE=1 SV=1                                            | MOUSE | 8  |
| 1012 | 14.61 | 14.68 | 33.81 | 31.67 | tr Q7TMG8 Q7TMG8_MOUSE | Glioblastoma amplified sequence OS=Mus musculus OX=10090 GN=Nipsnap2 PE=1 SV=1                                            | MOUSE | 8  |
| 1013 | 14.61 | 14.64 | 39.55 | 32.77 | tr C9K0Z7 C9K0Z7_MOUSE | Peptidylprolyl isomerase OS=Mus musculus OX=10090 GN=Fkbp8 PE=2 SV=1                                                      | MOUSE | 7  |
| 1014 | 14.59 | 14.61 | 41.67 | 33.33 | tr Q8K0E9 Q8K0E9_MOUSE | Dhdh protein (Fragment) OS=Mus musculus OX=10090 GN=Dhdh PE=2 SV=1                                                        | MOUSE | 8  |
| 1015 | 14.56 | 14.7  | 39.38 | 26.64 | sp Q91WN1 DNJC9_MOUSE  | DnaJ homolog subfamily C member 9 OS=Mus musculus OX=10090 GN=Dnajc9 PE=1 SV=2                                            | MOUSE | 8  |
| 1016 | 14.55 | 14.57 | 62.57 | 43.27 | tr F7CDT0 F7CDT0_MOUSE | NEDD8-conjugating enzyme Ubc12 (Fragment) OS=Mus musculus OX=10090 GN=Ube2m PE=1 SV=1                                     | MOUSE | 7  |
| 1017 | 14.47 | 14.72 | 18.69 | 11.20 | tr A2AFF6 A2AFF6_MOUSE | Cohesin subunit SA-2 OS=Mus musculus OX=10090 GN=Stag2 PE=1 SV=1                                                          | MOUSE | 11 |
| 1018 | 14.46 | 14.52 | 44.30 | 35.23 | sp Q8VD12 Z385A_MOUSE  | Zinc finger protein 385A OS=Mus musculus OX=10090 GN=Znf385a PE=1 SV=2                                                    | MOUSE | 8  |
| 1019 | 14.45 | 14.82 | 26.09 | 11.67 | sp Q9QZE5 COPG1_MOUSE  | Coatomer subunit gamma-1 OS=Mus musculus OX=10090 GN=Copg1 PE=1 SV=1                                                      | MOUSE | 7  |
| 1020 | 14.44 | 14.55 | 28.57 | 16.96 | tr B2KGP3 B2KGP3_MOUSE | Protein phosphatase 1E (PP2C domain containing) OS=Mus musculus OX=10090 GN=Ppm1e PE=1 SV=1                               | MOUSE | 9  |

|      |       |       |       |       |                                |                                                                                                                   |       |    |
|------|-------|-------|-------|-------|--------------------------------|-------------------------------------------------------------------------------------------------------------------|-------|----|
| 1021 | 14.43 | 14.49 | 33.86 | 24.83 | sp P36552 HEM6_MOUSE           | Oxygen-dependent coproporphyrinogen-III oxidase, mitochondrial OS=Mus musculus OX=10090 GN=Cpox PE=1 SV=2         | MOUSE | 8  |
| 1022 | 14.41 | 14.49 | 26.29 | 17.21 | tr B1AX58 B1AX58_MOUSE         | Plastin-3 OS=Mus musculus OX=10090 GN=Pls3 PE=1 SV=1                                                              | MOUSE | 8  |
| 1023 | 14.35 | 14.36 | 52.32 | 39.74 | tr Q5BLJ7 Q5BLJ7_MOUSE         | 40S ribosomal protein S13 OS=Mus musculus OX=10090 GN=Rps13 PE=1 SV=1                                             | MOUSE | 10 |
| 1024 | 14.34 | 14.49 | 22.86 | 18.64 | tr Q3UHW2 Q3UHW2_MOUSE         | Uncharacterized protein OS=Mus musculus OX=10090 GN=Hsd17b4 PE=2 SV=1                                             | MOUSE | 9  |
| 1025 | 14.33 | 14.51 | 30.39 | 15.59 | sp Q61550 RAD21_MOUSE          | Double-strand-break repair protein rad21 homolog OS=Mus musculus OX=10090 GN=Rad21 PE=1 SV=3                      | MOUSE | 8  |
| 1026 | 14.32 | 24.7  | 70.48 | 64.32 | tr Q542T7 Q542T7_MOUSE         | Ras-related protein Rab-3 OS=Mus musculus OX=10090 GN=Rab3c PE=1 SV=1                                             | MOUSE | 16 |
| 1027 | 14.32 | 16.56 | 45.66 | 35.55 | tr D3Z3N4 D3Z3N4_MOUSE         | Heterogeneous nuclear ribonucleoprotein H3 OS=Mus musculus OX=10090 GN=Hnrrnp3 PE=1 SV=1                          | MOUSE | 10 |
| 1028 | 14.3  | 14.46 | 26.98 | 22.34 | sp Q60900 ELAV3_MOUSE          | ELAV-like protein 3 OS=Mus musculus OX=10090 GN=Elavl3 PE=1 SV=1                                                  | MOUSE | 8  |
| 1029 | 14.3  | 14.31 | 47.95 | 42.47 | sp Q9D1D4 TMEDA_MOUSE          | Transmembrane emp24 domain-containing protein 10 OS=Mus musculus OX=10090 GN=Tmed10 PE=1 SV=1                     | MOUSE | 9  |
| 1030 | 14.26 | 14.39 | 66.83 | 42.93 | sp P62696 CRBB2_MOUSE          | Beta-crystallin B2 OS=Mus musculus OX=10090 GN=Crybb2 PE=1 SV=2                                                   | MOUSE | 10 |
| 1031 | 14.23 | 14.34 | 24.14 | 19.38 | tr A0A5F8MPK9 A0A5F8MPK9_MOUSE | Phosphatidylinositol-3-phosphatase SAC1 OS=Mus musculus OX=10090 GN=Sacm1l PE=1 SV=1                              | MOUSE | 9  |
| 1032 | 14.23 | 14.29 | 30.86 | 25.68 | sp Q99L43 CDS2_MOUSE           | Phosphatidate cytidyltransferase 2 OS=Mus musculus OX=10090 GN=Cds2 PE=1 SV=1                                     | MOUSE | 8  |
| 1033 | 14.18 | 14.37 | 30.50 | 14.86 | tr Q6GTL7 Q6GTL7_MOUSE         | 6-phosphofructo-2-kinase OS=Mus musculus OX=10090 GN=Pfkfb2 PE=1 SV=1                                             | MOUSE | 9  |
| 1034 | 14.18 | 14.23 | 44.24 | 34.85 | sp Q8BTX9 HSDL1_MOUSE          | Inactive hydroxysteroid dehydrogenase-like protein 1 OS=Mus musculus OX=10090 GN=Hsd1l PE=1 SV=1                  | MOUSE | 8  |
| 1035 | 14.13 | 14.32 | 26.92 | 21.63 | tr Q3UJ95 Q3UJ95_MOUSE         | Uncharacterized protein OS=Mus musculus OX=10090 GN=Pip4k2b PE=1 SV=1                                             | MOUSE | 7  |
| 1036 | 14.13 | 14.13 | 31.21 | 29.48 | sp Q9WUM5 SUCA_MOUSE           | Succinate--CoA ligase [ADP/GDP-forming] subunit alpha, mitochondrial OS=Mus musculus OX=10090 GN=Sudlg1 PE=1 SV=4 | MOUSE | 8  |



|      |       |       |       |       |                        |                                                                                         |       |    |
|------|-------|-------|-------|-------|------------------------|-----------------------------------------------------------------------------------------|-------|----|
| 1037 | 14.1  | 14.22 | 35.97 | 32.70 | sp Q8CG76 ARK72_MOUSE  | Aflatoxin B1 aldehyde reductase member 2 OS=Mus musculus OX=10090 GN=Akr7a2 PE=1 SV=3   | MOUSE | 8  |
| 1038 | 14.1  | 14.19 | 54.91 | 36.16 | tr Q3UBU9 Q3UBU9_MOUSE | Peptidylprolyl isomerase OS=Mus musculus OX=10090 GN=Fkbp3 PE=1 SV=1                    | MOUSE | 8  |
| 1039 | 14.09 | 14.13 | 45.81 | 35.20 | tr Q8C1Y3 Q8C1Y3_MOUSE | H15 domain-containing protein OS=Mus musculus OX=10090 GN=H1f0 PE=2 SV=1                | MOUSE | 9  |
| 1040 | 14.07 | 14.23 | 41.31 | 33.50 | tr Q9Z1A1 Q9Z1A1_MOUSE | TFG protein OS=Mus musculus OX=10090 GN=Tfg PE=1 SV=1                                   | MOUSE | 11 |
| 1041 | 14.07 | 14.12 | 58.33 | 46.08 | sp Q99PT1 GDIR1_MOUSE  | Rho GDP-dissociation inhibitor 1 OS=Mus musculus OX=10090 GN=Arhgdia PE=1 SV=3          | MOUSE | 10 |
| 1042 | 14.06 | 39.8  | 22.70 | 20.48 | tr H2BL43 H2BL43_MOUSE | Calcium-transporting ATPase OS=Mus musculus OX=10090 GN=Atp2b4 PE=2 SV=1                | MOUSE | 21 |
| 1043 | 14.06 | 14.06 | 56.43 | 56.43 | sp Q9JJV2 PROF2_MOUSE  | Profilin-2 OS=Mus musculus OX=10090 GN=Pfn2 PE=1 SV=3                                   | MOUSE | 10 |
| 1044 | 14.03 | 14.03 | 30.67 | 24.37 | tr Q3THA6 Q3THA6_MOUSE | Uncharacterized protein OS=Mus musculus OX=10090 GN=Srsf7 PE=2 SV=1                     | MOUSE | 7  |
| 1045 | 14.02 | 14.02 | 34.26 | 26.54 | sp Q921M7 CYRIB_MOUSE  | CYFIP-related Rac1 interactor B OS=Mus musculus OX=10090 GN=Cyrib PE=1 SV=1             | MOUSE | 8  |
| 1046 | 14.01 | 14.09 | 20.80 | 15.21 | tr Q3UYK6 Q3UYK6_MOUSE | Amino acid transporter OS=Mus musculus OX=10090 GN=Slc1a2 PE=2 SV=1                     | MOUSE | 8  |
| 1047 | 14.01 | 14.04 | 57.54 | 48.81 | sp Q9CXS4 CENPV_MOUSE  | Centromere protein V OS=Mus musculus OX=10090 GN=Cenpv PE=1 SV=2                        | MOUSE | 8  |
| 1048 | 14    | 32.16 | 65.31 | 56.85 | tr Q9D7B3 Q9D7B3_MOUSE | Uncharacterized protein (Fragment) OS=Mus musculus OX=10090 GN=Gnat2 PE=2 SV=2          | MOUSE | 18 |
| 1049 | 14    | 14    | 56.07 | 55.49 | tr Q569M7 Q569M7_MOUSE | Cryaa protein OS=Mus musculus OX=10090 GN=Cryaa PE=2 SV=1                               | MOUSE | 7  |
| 1050 | 13.98 | 14.13 | 28.83 | 18.75 | tr Q3UK24 Q3UK24_MOUSE | WD_REPEATS_REGION domain-containing protein OS=Mus musculus OX=10090 GN=Wdr37 PE=2 SV=1 | MOUSE | 7  |
| 1051 | 13.98 | 14.02 | 54.24 | 44.07 | tr Q5HZY7 Q5HZY7_MOUSE | V-type proton ATPase subunit G OS=Mus musculus OX=10090 GN=Atp6v1g1 PE=1 SV=1           | MOUSE | 7  |
| 1052 | 13.96 | 14.01 | 28.40 | 25.05 | tr Q99PH4 Q99PH4_MOUSE | Aldehyde dehydrogenase OS=Mus musculus OX=10090 GN=Aldh3a2 PE=3 SV=1                    | MOUSE | 9  |
| 1053 | 13.95 | 14.09 | 37.23 | 33.58 | tr Q8BQL7 Q8BQL7_MOUSE | CUE domain-containing protein OS=Mus musculus OX=10090 GN=Tollip PE=2 SV=1              | MOUSE | 9  |

|      |       |       |       |       |                                |                                                                                                           |       |    |
|------|-------|-------|-------|-------|--------------------------------|-----------------------------------------------------------------------------------------------------------|-------|----|
| 1054 | 13.95 | 14.07 | 36.53 | 16.83 | tr Q3UCF2 Q3UCF2_MOUSE         | Uncharacterized protein OS=Mus musculus OX=10090 GN=Cdc5l PE=1 SV=1                                       | MOUSE | 7  |
| 1055 | 13.94 | 41.82 | 44.75 | 41.10 | sp P43274 H14_MOUSE            | Histone H1.4 OS=Mus musculus OX=10090 GN=H1-4 PE=1 SV=2                                                   | MOUSE | 40 |
| 1056 | 13.94 | 13.95 | 67.41 | 62.22 | sp P52760 RIDA_MOUSE           | 2-iminobutanoate/2-iminopropanoate deaminase OS=Mus musculus OX=10090 GN=Rida PE=1 SV=3                   | MOUSE | 7  |
| 1057 | 13.91 | 13.94 | 38.19 | 34.63 | tr G5E8T9 G5E8T9_MOUSE         | Hydroxyacylglutathione hydrolase, mitochondrial OS=Mus musculus OX=10090 GN=Hagh PE=1 SV=1                | MOUSE | 7  |
| 1058 | 13.9  | 14.05 | 26.42 | 20.57 | sp Q3TIX9 SNUT2_MOUSE          | U4/U6.U5 tri-snRNP-associated protein 2 OS=Mus musculus OX=10090 GN=Usp39 PE=1 SV=2                       | MOUSE | 8  |
| 1059 | 13.9  | 13.94 | 60.11 | 42.55 | tr F8WJG3 F8WJG3_MOUSE         | Transformer-2 protein homolog beta OS=Mus musculus OX=10090 GN=Tra2b PE=1 SV=1                            | MOUSE | 7  |
| 1060 | 13.89 | 13.92 | 29.56 | 26.60 | tr Q3UGB5 Q3UGB5_MOUSE         | DAZ-associated protein 1 OS=Mus musculus OX=10090 GN=Dazap1 PE=1 SV=1                                     | MOUSE | 8  |
| 1061 | 13.87 | 13.94 | 28.59 | 14.23 | sp Q61102 ABCB7_MOUSE          | Iron-sulfur clusters transporter ABCB7, mitochondrial OS=Mus musculus OX=10090 GN=Abcb7 PE=1 SV=3         | MOUSE | 7  |
| 1062 | 13.87 | 13.9  | 23.90 | 22.43 | sp Q5SUF2-3 LC7L3_MOUSE        | Isoform 3 of Luc7-like protein 3 OS=Mus musculus OX=10090 GN=Luc7l3                                       | MOUSE | 7  |
| 1063 | 13.85 | 14.88 | 69.83 | 69.83 | sp Q9CPP6 NDUA5_MOUSE          | NADH dehydrogenase [ubiquinone] 1 alpha subcomplex subunit 5 OS=Mus musculus OX=10090 GN=Ndufa5 PE=1 SV=3 | MOUSE | 8  |
| 1064 | 13.85 | 14.43 | 35.71 | 29.29 | tr Q5KU03 Q5KU03_MOUSE         | Glycogen synthase kinase-3 beta OS=Mus musculus OX=10090 GN=Gsk3b PE=1 SV=1                               | MOUSE | 8  |
| 1065 | 13.83 | 14.14 | 22.22 | 12.90 | sp Q9DBC3 CMTR1_MOUSE          | Cap-specific mRNA (nucleoside-2'-O-)-methyltransferase 1 OS=Mus musculus OX=10090 GN=Cmtr1 PE=1 SV=1      | MOUSE | 9  |
| 1066 | 13.82 | 14.22 | 42.95 | 38.26 | tr Q91YK6 Q91YK6_MOUSE         | Rpl23a protein (Fragment) OS=Mus musculus OX=10090 GN=Rpl23a PE=2 SV=1                                    | MOUSE | 8  |
| 1067 | 13.82 | 13.93 | 52.40 | 44.73 | tr A0A0R4J094 A0A0R4J094_MOUSE | Fumarylacetoacetate hydrolase domain-containing 2A OS=Mus musculus OX=10090 GN=Fahd2a PE=1 SV=1           | MOUSE | 7  |
| 1068 | 13.77 | 13.98 | 19.81 | 11.74 | sp Q9EQQ9-3 OGA_MOUSE          | Isoform 3 of Protein O-GlcNAcase OS=Mus musculus OX=10090 GN=Oga                                          | MOUSE | 9  |
| 1069 | 13.77 | 13.8  | 53.59 | 53.59 | sp Q8VBV7 CSN8_MOUSE           | COP9 signalosome complex subunit 8 OS=Mus musculus OX=10090 GN=Cops8 PE=1 SV=1                            | MOUSE | 7  |

|      |       |       |       |       |                        |                                                                                                   |       |    |
|------|-------|-------|-------|-------|------------------------|---------------------------------------------------------------------------------------------------|-------|----|
| 1070 | 13.76 | 13.85 | 51.28 | 35.38 | tr Q3TXU8 Q3TXU8_MOUSE | Cytochrome b5 heme-binding domain-containing protein OS=Mus musculus OX=10090 GN=Pgrmc1 PE=1 SV=1 | MOUSE | 7  |
| 1071 | 13.73 | 13.89 | 31.96 | 16.96 | sp Q91X72 HEMO_MOUSE   | Hemopexin OS=Mus musculus OX=10090 GN=HpX PE=1 SV=2                                               | MOUSE | 8  |
| 1072 | 13.73 | 13.75 | 73.48 | 65.91 | tr Q6ZWZ6 Q6ZWZ6_MOUSE | 40S ribosomal protein S12 OS=Mus musculus OX=10090 GN=Rps12 PE=1 SV=1                             | MOUSE | 8  |
| 1073 | 13.69 | 13.74 | 39.89 | 35.11 | tr Q642K1 Q642K1_MOUSE | Ribosomal protein L18 OS=Mus musculus OX=10090 GN=Rpl18 PE=2 SV=1                                 | MOUSE | 8  |
| 1074 | 13.67 | 13.78 | 50.77 | 39.03 | sp Q8BH69 SPS1_MOUSE   | Selenide, water dikinase 1 OS=Mus musculus OX=10090 GN=Sephs1 PE=1 SV=1                           | MOUSE | 8  |
| 1075 | 13.65 | 13.71 | 29.91 | 20.24 | tr Q3ULL5 Q3ULL5_MOUSE | Eif2s2 protein OS=Mus musculus OX=10090 GN=Eif2s2 PE=1 SV=1                                       | MOUSE | 7  |
| 1076 | 13.62 | 13.64 | 35.80 | 35.50 | tr Q3TD71 Q3TD71_MOUSE | Secretory carrier-associated membrane protein OS=Mus musculus OX=10090 GN=Scamp1 PE=1 SV=1        | MOUSE | 8  |
| 1077 | 13.61 | 26.01 | 25.30 | 21.58 | sp Q91WM1 STRBP_MOUSE  | Spermatid perinuclear RNA-binding protein OS=Mus musculus OX=10090 GN=Strbp PE=1 SV=1             | MOUSE | 14 |
| 1078 | 13.61 | 21.82 | 60.39 | 56.51 | sp Q9JKB3 YBOX3_MOUSE  | Y-box-binding protein 3 OS=Mus musculus OX=10090 GN=Ybx3 PE=1 SV=2                                | MOUSE | 12 |
| 1079 | 13.59 | 13.89 | 19.44 | 9.13  | sp Q6NV83 SR140_MOUSE  | U2 snRNP-associated SURP motif-containing protein OS=Mus musculus OX=10090 GN=U2surp PE=1 SV=3    | MOUSE | 7  |
| 1080 | 13.59 | 13.64 | 52.57 | 34.14 | sp P47199 QOR_MOUSE    | Quinone oxidoreductase OS=Mus musculus OX=10090 GN=Cryz PE=1 SV=1                                 | MOUSE | 7  |
| 1081 | 13.54 | 13.62 | 15.17 | 9.86  | tr Q8CHG1 Q8CHG1_MOUSE | MKIAA0369 protein (Fragment) OS=Mus musculus OX=10090 GN=Dck1 PE=2 SV=1                           | MOUSE | 7  |
| 1082 | 13.52 | 15.7  | 41.53 | 37.21 | sp Q9DCT1 AKCL2_MOUSE  | 1,5-anhydro-D-fructose reductase OS=Mus musculus OX=10090 GN=Akr1e2 PE=1 SV=1                     | MOUSE | 9  |
| 1083 | 13.51 | 13.56 | 45.89 | 41.13 | sp P27048 RSMB_MOUSE   | Small nuclear ribonucleoprotein-associated protein B OS=Mus musculus OX=10090 GN=Snrpb PE=1 SV=1  | MOUSE | 12 |
| 1084 | 13.5  | 13.67 | 57.34 | 37.12 | sp Q9QYA2 TOM40_MOUSE  | Mitochondrial import receptor subunit TOM40 homolog OS=Mus musculus OX=10090 GN=Tomm40 PE=1 SV=3  | MOUSE | 8  |
| 1085 | 13.5  | 13.66 | 29.70 | 15.25 | tr Q3UKF5 Q3UKF5_MOUSE | X-prolyl aminopeptidase OS=Mus musculus OX=10090 GN=Xpnpep1 PE=2 SV=1                             | MOUSE | 7  |

|      |       |       |       |       |                                |                                                                                                    |       |    |
|------|-------|-------|-------|-------|--------------------------------|----------------------------------------------------------------------------------------------------|-------|----|
| 1086 | 13.49 | 13.65 | 59.77 | 54.60 | tr A0A087WRH2 A0A087WRH2_MOUSE | Fas apoptotic inhibitory molecule 1 (Fragment) OS=Mus musculus OX=10090 GN=Faim PE=1 SV=6          | MOUSE | 8  |
| 1087 | 13.49 | 13.55 | 18.04 | 13.70 | tr Q69ZI4 Q69ZI4_MOUSE         | MKIAA1480 protein (Fragment) OS=Mus musculus OX=10090 GN=mKIAA1480 PE=2 SV=1                       | MOUSE | 8  |
| 1088 | 13.48 | 13.65 | 11.58 | 4.54  | tr A0A0N4SVL0 A0A0N4SVL0_MOUSE | Eukaryotic translation initiation factor 4 gamma 3 OS=Mus musculus OX=10090 GN=Eif4g3 PE=1 SV=2    | MOUSE | 7  |
| 1089 | 13.44 | 13.65 | 18.04 | 15.24 | tr Q3V165 Q3V165_MOUSE         | Bardet-Biedl syndrome 7 protein homolog OS=Mus musculus OX=10090 GN=Bbs7 PE=2 SV=1                 | MOUSE | 9  |
| 1090 | 13.43 | 13.65 | 52.79 | 39.02 | tr A0MNP4 A0MNP4_MOUSE         | CDW13/WDR61 OS=Mus musculus OX=10090 GN=Wdr61 PE=1 SV=1                                            | MOUSE | 8  |
| 1091 | 13.42 | 13.64 | 24.87 | 13.45 | tr Q3UZH3 Q3UZH3_MOUSE         | C-1-tetrahydrofolate synthase, cytoplasmic (Fragment) OS=Mus musculus OX=10090 GN=Mthfd1 PE=2 SV=1 | MOUSE | 8  |
| 1092 | 13.42 | 13.46 | 61.74 | 61.74 | tr Q58DZ3 Q58DZ3_MOUSE         | 60S ribosomal protein L30 OS=Mus musculus OX=10090 GN=Rpl30 PE=1 SV=1                              | MOUSE | 7  |
| 1093 | 13.39 | 13.64 | 38.46 | 33.78 | tr Q3TDN8 Q3TDN8_MOUSE         | AB hydrolase-1 domain-containing protein OS=Mus musculus OX=10090 GN=Bphl PE=2 SV=1                | MOUSE | 7  |
| 1094 | 13.38 | 13.44 | 62.31 | 56.15 | tr Q5M9M4 Q5M9M4_MOUSE         | 40S ribosomal protein S15a OS=Mus musculus OX=10090 GN=Rps15a PE=1 SV=1                            | MOUSE | 7  |
| 1095 | 13.34 | 14.31 | 47.84 | 40.29 | tr Q544Q7 Q544Q7_MOUSE         | Sodium/potassium-transporting ATPase subunit beta OS=Mus musculus OX=10090 GN=Atp1b3 PE=1 SV=1     | MOUSE | 9  |
| 1096 | 13.31 | 13.51 | 13.49 | 9.61  | tr Q8C8Y2 Q8C8Y2_MOUSE         | WD repeat domain 17 OS=Mus musculus OX=10090 GN=Wdr17 PE=1 SV=1                                    | MOUSE | 9  |
| 1097 | 13.26 | 13.3  | 33.41 | 22.99 | tr Q8C1W9 Q8C1W9_MOUSE         | Uncharacterized protein OS=Mus musculus OX=10090 GN=Nap114 PE=2 SV=1                               | MOUSE | 7  |
| 1098 | 13.22 | 13.26 | 20.32 | 19.07 | tr A2A513 A2A513_MOUSE         | Keratin, type I cytoskeletal 10 OS=Mus musculus OX=10090 GN=Krt10 PE=1 SV=1                        | MOUSE | 9  |
| 1099 | 13.21 | 17.74 | 32.34 | 20.77 | tr Q570Z8 Q570Z8_MOUSE         | MKIAA4114 protein (Fragment) OS=Mus musculus OX=10090 GN=Picalm PE=2 SV=1                          | MOUSE | 12 |
| 1100 | 13.2  | 13.46 | 44.41 | 36.42 | tr B2RXQ8 B2RXQ8_MOUSE         | WD repeat domain containing 82 OS=Mus musculus OX=10090 GN=Wdr82 PE=1 SV=1                         | MOUSE | 7  |
| 1101 | 13.19 | 13.28 | 46.58 | 46.15 | tr Q8C266 Q8C266_MOUSE         | Ras-related protein Rab-5C OS=Mus musculus OX=10090 GN=Rab5c PE=1 SV=1                             | MOUSE | 9  |

|      |       |       |       |       |                        |                                                                                                                   |       |    |
|------|-------|-------|-------|-------|------------------------|-------------------------------------------------------------------------------------------------------------------|-------|----|
| 1102 | 13.18 | 13.22 | 41.22 | 33.11 | sp P14115 RL27A_MOUSE  | 60S ribosomal protein L27a OS=Mus musculus OX=10090 GN=Rpl27a PE=1 SV=5                                           | MOUSE | 7  |
| 1103 | 13.17 | 15.52 | 40.18 | 22.00 | tr Q3U6B1 Q3U6B1_MOUSE | Uncharacterized protein (Fragment) OS=Mus musculus OX=10090 GN=G3bp2 PE=2 SV=1                                    | MOUSE | 10 |
| 1104 | 13.17 | 13.32 | 46.39 | 22.89 | sp O35685 NUDC_MOUSE   | Nuclear migration protein nudC OS=Mus musculus OX=10090 GN=Nudc PE=1 SV=1                                         | MOUSE | 8  |
| 1105 | 13.15 | 13.2  | 26.09 | 24.45 | tr G3UYZ1 G3UYZ1_MOUSE | Immunoglobulin superfamily member 8 OS=Mus musculus OX=10090 GN=Igsf8 PE=1 SV=1                                   | MOUSE | 8  |
| 1106 | 13.13 | 15.23 | 67.57 | 54.05 | sp P83917 CBX1_MOUSE   | Chromobox protein homolog 1 OS=Mus musculus OX=10090 GN=Cbx1 PE=1 SV=1                                            | MOUSE | 8  |
| 1107 | 13.1  | 13.21 | 47.92 | 21.73 | sp Q8C0E2 VP26B_MOUSE  | Vacuolar protein sorting-associated protein 26B OS=Mus musculus OX=10090 GN=Vps26b PE=1 SV=1                      | MOUSE | 7  |
| 1108 | 13.08 | 18.8  | 6.91  | 3.99  | sp Q9EPN1 NBEA_MOUSE   | Neurobeachin OS=Mus musculus OX=10090 GN=Nbea PE=1 SV=1                                                           | MOUSE | 10 |
| 1109 | 13.02 | 13.07 | 38.78 | 34.98 | sp Q9DCT2 NDUS3_MOUSE  | NADH dehydrogenase [ubiquinone] iron-sulfur protein 3, mitochondrial OS=Mus musculus OX=10090 GN=Ndufs3 PE=1 SV=2 | MOUSE | 8  |
| 1110 | 13    | 13.1  | 30.40 | 20.10 | sp Q99LR1 ABD12_MOUSE  | Lysophosphatidylserine lipase ABHD12 OS=Mus musculus OX=10090 GN=Abhd12 PE=1 SV=2                                 | MOUSE | 6  |
| 1111 | 13    | 13.1  | 25.66 | 19.96 | tr F6WDS8 F6WDS8_MOUSE | Regulator of G-protein-signaling 6 OS=Mus musculus OX=10090 GN=Rgs6 PE=1 SV=1                                     | MOUSE | 7  |
| 1112 | 13    | 13.07 | 47.44 | 41.45 | sp P49722 PSA2_MOUSE   | Proteasome subunit alpha type-2 OS=Mus musculus OX=10090 GN=Psm2 PE=1 SV=3                                        | MOUSE | 7  |
| 1113 | 12.99 | 28.57 | 49.67 | 49.22 | sp P70333 HNRH2_MOUSE  | Heterogeneous nuclear ribonucleoprotein H2 OS=Mus musculus OX=10090 GN=Hnrnp2 PE=1 SV=1                           | MOUSE | 19 |
| 1114 | 12.99 | 13.04 | 22.54 | 17.46 | tr Q3TE95 Q3TE95_MOUSE | Uncharacterized protein OS=Mus musculus OX=10090 GN=Rcn2 PE=2 SV=1                                                | MOUSE | 7  |
| 1115 | 12.95 | 12.97 | 32.35 | 32.35 | tr Q91V55 Q91V55_MOUSE | 40S ribosomal protein S5 OS=Mus musculus OX=10090 GN=Rps5 PE=1 SV=1                                               | MOUSE | 7  |
| 1116 | 12.93 | 13.1  | 43.62 | 26.62 | sp Q3U5Q7 CMPK2_MOUSE  | UMP-CMP kinase 2, mitochondrial OS=Mus musculus OX=10090 GN=Cmpk2 PE=1 SV=2                                       | MOUSE | 7  |
| 1117 | 12.89 | 13.25 | 23.20 | 10.38 | tr D3Z0M9 D3Z0M9_MOUSE | RNA helicase OS=Mus musculus OX=10090 GN=Ddx23 PE=1 SV=1                                                          | MOUSE | 7  |

|      |       |       |       |       |                         |                                                                                                                  |       |    |
|------|-------|-------|-------|-------|-------------------------|------------------------------------------------------------------------------------------------------------------|-------|----|
| 1118 | 12.88 | 13.05 | 45.49 | 35.69 | tr Q9DCD8 Q9DCD8_MOUSE  | Proteasome subunit alpha type OS=Mus musculus<br>OX=10090 GN=Psm3 PE=2 SV=1                                      | MOUSE | 9  |
| 1119 | 12.86 | 12.95 | 72.17 | 65.22 | tr Q545F0 Q545F0_MOUSE  | Macrophage migration inhibitory factor OS=Mus musculus<br>OX=10090 GN=Mif PE=1 SV=1                              | MOUSE | 11 |
| 1120 | 12.82 | 12.98 | 29.47 | 23.38 | tr Q3TM67 Q3TM67_MOUSE  | PUA domain-containing protein OS=Mus musculus<br>OX=10090 GN=Dkc1 PE=2 SV=1                                      | MOUSE | 7  |
| 1121 | 12.82 | 12.98 | 91.53 | 58.47 | sp P62869 ELOB_MOUSE    | Elongin-B OS=Mus musculus OX=10090 GN=Elob PE=1<br>SV=1                                                          | MOUSE | 7  |
| 1122 | 12.82 | 12.97 | 20.94 | 14.37 | tr Q571E2 Q571E2_MOUSE  | MFLJ00383 protein (Fragment) OS=Mus musculus<br>OX=10090 GN=Atp6ap1 PE=2 SV=1                                    | MOUSE | 6  |
| 1123 | 12.81 | 12.91 | 73.39 | 67.74 | sp Q9DAK9 PHP14_MOUSE   | 14 kDa phosphohistidine phosphatase OS=Mus musculus<br>OX=10090 GN=Phpt1 PE=1 SV=1                               | MOUSE | 9  |
| 1124 | 12.81 | 12.88 | 21.32 | 20.81 | tr Q78P93 Q78P93_MOUSE  | Ceramidase OS=Mus musculus OX=10090 GN=Asah1 PE=1<br>SV=1                                                        | MOUSE | 7  |
| 1125 | 12.8  | 12.87 | 52.43 | 52.43 | tr B1ARA3 B1ARA3_MOUSE  | 60S ribosomal protein L26 (Fragment) OS=Mus musculus<br>OX=10090 GN=Rpl26 PE=1 SV=1                              | MOUSE | 7  |
| 1126 | 12.79 | 12.91 | 14.64 | 8.47  | tr G3X9J4 G3X9J4_MOUSE  | RAB11-binding protein RELCH OS=Mus musculus<br>OX=10090 GN=Relch PE=1 SV=2                                       | MOUSE | 7  |
| 1127 | 12.79 | 12.88 | 15.96 | 11.85 | sp P28571-1 SC6A9_MOUSE | Isoform GlyT-1A of Sodium- and chloride-dependent<br>glycine transporter 1 OS=Mus musculus OX=10090<br>GN=Slc6a9 | MOUSE | 7  |
| 1128 | 12.76 | 12.96 | 27.32 | 11.60 | sp Q9WTX6 CUL1_MOUSE    | Cullin-1 OS=Mus musculus OX=10090 GN=Cul1 PE=1 SV=1                                                              | MOUSE | 6  |
| 1129 | 12.7  | 14.75 | 41.85 | 39.08 | sp Q9D0M3 CY1_MOUSE     | Cytochrome c1, heme protein, mitochondrial OS=Mus<br>musculus OX=10090 GN=Cyc1 PE=1 SV=1                         | MOUSE | 9  |
| 1130 | 12.68 | 12.82 | 45.42 | 25.73 | sp Q922V4 PLRG1_MOUSE   | Pleiotropic regulator 1 OS=Mus musculus OX=10090<br>GN=Plrg1 PE=1 SV=1                                           | MOUSE | 7  |
| 1131 | 12.67 | 12.84 | 42.47 | 27.42 | sp Q3TDN2 FAF2_MOUSE    | FAS-associated factor 2 OS=Mus musculus OX=10090<br>GN=Faf2 PE=1 SV=2                                            | MOUSE | 7  |
| 1132 | 12.66 | 12.84 | 41.83 | 31.30 | sp P42208 SEPT2_MOUSE   | Septin-2 OS=Mus musculus OX=10090 GN=Septin2 PE=1<br>SV=2                                                        | MOUSE | 9  |
| 1133 | 12.65 | 15.07 | 34.15 | 21.95 | sp Q6PDL0 DC1L2_MOUSE   | Cytoplasmic dynein 1 light intermediate chain 2 OS=Mus<br>musculus OX=10090 GN=Dync1li2 PE=1 SV=2                | MOUSE | 8  |

|      |       |       |       |       |                        |                                                                                                                              |       |    |
|------|-------|-------|-------|-------|------------------------|------------------------------------------------------------------------------------------------------------------------------|-------|----|
| 1134 | 12.64 | 15.68 | 69.02 | 57.07 | sp P62835 RAP1A_MOUSE  | Ras-related protein Rap-1A OS=Mus musculus OX=10090 GN=Rap1a PE=1 SV=1                                                       | MOUSE | 9  |
| 1135 | 12.64 | 12.76 | 37.38 | 34.58 | tr A1L3B8 A1L3B8_MOUSE | Proteasome (Prosome, macropain) 26S subunit, non-ATPase, 7 OS=Mus musculus OX=10090 GN=Psm7 PE=1 SV=1                        | MOUSE | 9  |
| 1136 | 12.64 | 12.73 | 52.02 | 39.52 | tr Q564E5 Q564E5_MOUSE | Eukaryotic translation initiation factor 4H OS=Mus musculus OX=10090 GN=Eif4h PE=2 SV=1                                      | MOUSE | 7  |
| 1137 | 12.64 | 12.72 | 55.88 | 47.06 | tr Q5BLJ9 Q5BLJ9_MOUSE | 60S ribosomal protein L27 OS=Mus musculus OX=10090 GN=Rpl27 PE=1 SV=1                                                        | MOUSE | 9  |
| 1138 | 12.59 | 12.7  | 44.00 | 44.00 | sp O70251 EF1B_MOUSE   | Elongation factor 1-beta OS=Mus musculus OX=10090 GN=Eef1b PE=1 SV=5                                                         | MOUSE | 9  |
| 1139 | 12.59 | 12.67 | 52.53 | 49.42 | sp Q9CQ60 6PGL_MOUSE   | 6-phosphogluconolactonase OS=Mus musculus OX=10090 GN=Pgl6 PE=1 SV=1                                                         | MOUSE | 8  |
| 1140 | 12.58 | 12.69 | 42.37 | 28.81 | sp Q9D710 TMX2_MOUSE   | Thioredoxin-related transmembrane protein 2 OS=Mus musculus OX=10090 GN=Tmx2 PE=1 SV=1                                       | MOUSE | 8  |
| 1141 | 12.57 | 12.64 | 51.70 | 43.54 | tr Q569Y6 Q569Y6_MOUSE | Ubiquitin-conjugating enzyme E2 variant 1 OS=Mus musculus OX=10090 GN=Ube2v1 PE=2 SV=1                                       | MOUSE | 7  |
| 1142 | 12.55 | 28.85 | 39.42 | 21.84 | tr Q4KML7 Q4KML7_MOUSE | Ezrin OS=Mus musculus OX=10090 GN=Ezr PE=1 SV=1                                                                              | MOUSE | 15 |
| 1143 | 12.54 | 13.03 | 41.29 | 35.32 | tr I7HLV2 I7HLV2_MOUSE | 60S ribosomal protein L10 (Fragment) OS=Mus musculus OX=10090 GN=Rpl10 PE=1 SV=1                                             | MOUSE | 7  |
| 1144 | 12.54 | 12.62 | 20.96 | 16.77 | sp Q8BKZ9 ODPX_MOUSE   | Pyruvate dehydrogenase protein X component, mitochondrial OS=Mus musculus OX=10090 GN=Pdhx PE=1 SV=1                         | MOUSE | 6  |
| 1145 | 12.51 | 12.58 | 56.52 | 38.04 | sp Q9CRC9 GNPI2_MOUSE  | Glucosamine-6-phosphate isomerase 2 OS=Mus musculus OX=10090 GN=Gnpda2 PE=1 SV=1                                             | MOUSE | 8  |
| 1146 | 12.49 | 12.62 | 31.14 | 20.25 | tr Q99J57 Q99J57_MOUSE | S-adenosylmethionine synthase OS=Mus musculus OX=10090 GN=Mat2a PE=1 SV=1                                                    | MOUSE | 7  |
| 1147 | 12.46 | 12.49 | 28.09 | 16.50 | tr Q571J7 Q571J7_MOUSE | Serine/threonine-protein phosphatase 2A 55 kDa regulatory subunit B (Fragment) OS=Mus musculus OX=10090 GN=Ppp2r2a PE=2 SV=1 | MOUSE | 6  |
| 1148 | 12.45 | 12.62 | 34.56 | 30.39 | sp Q8BLF1 NCEH1_MOUSE  | Neutral cholesterol ester hydrolase 1 OS=Mus musculus OX=10090 GN=Nceh1 PE=1 SV=1                                            | MOUSE | 8  |

|      |       |       |       |       |                                        |                                                                                                                           |       |    |
|------|-------|-------|-------|-------|----------------------------------------|---------------------------------------------------------------------------------------------------------------------------|-------|----|
| 1149 | 12.45 | 12.47 | 25.00 | 16.27 | sp Q9JHI5 IVD_MO<br>USE                | Isovaleryl-CoA dehydrogenase, mitochondrial OS=Mus<br>musculus OX=10090 GN=Ivd PE=1 SV=1                                  | MOUSE | 6  |
| 1150 | 12.43 | 12.57 | 25.30 | 14.26 | tr Q91YS2 Q91YS2_<br>MOUSE             | Rangap1 protein OS=Mus musculus OX=10090<br>GN=Rangap1 PE=2 SV=1                                                          | MOUSE | 7  |
| 1151 | 12.41 | 12.44 | 29.98 | 14.72 | tr Q8C2T9 Q8C2T9_<br>MOUSE             | Uncharacterized protein OS=Mus musculus OX=10090<br>GN=Ik PE=2 SV=1                                                       | MOUSE | 7  |
| 1152 | 12.39 | 12.53 | 24.63 | 24.04 | sp Q9WVT6 CAH14_<br>MOUSE              | Carbonic anhydrase 14 OS=Mus musculus OX=10090<br>GN=Ca14 PE=1 SV=1                                                       | MOUSE | 7  |
| 1153 | 12.38 | 12.44 | 44.84 | 27.34 | sp Q9QZB7 ARP10_<br>MOUSE              | Actin-related protein 10 OS=Mus musculus OX=10090<br>GN=Actr10 PE=1 SV=2                                                  | MOUSE | 6  |
| 1154 | 12.37 | 12.49 | 37.24 | 33.47 | tr G3UW94 G3UW9<br>4_MOUSE             | Splicing factor U2AF 35 kDa subunit OS=Mus musculus<br>OX=10090 GN=U2af1 PE=1 SV=1                                        | MOUSE | 10 |
| 1155 | 12.37 | 12.45 | 38.28 | 22.97 | sp Q8R2R9 AP3M2_<br>MOUSE              | AP-3 complex subunit mu-2 OS=Mus musculus OX=10090<br>GN=Ap3m2 PE=1 SV=1                                                  | MOUSE | 6  |
| 1156 | 12.35 | 12.45 | 31.82 | 29.09 | tr Q9DD05 Q9DD05_<br>MOUSE             | Delta-aminolevulinic acid dehydratase OS=Mus musculus<br>OX=10090 GN=Alad PE=2 SV=1                                       | MOUSE | 7  |
| 1157 | 12.33 | 12.44 | 13.63 | 11.00 | tr E9Q8K8 E9Q8K8_<br>MOUSE             | Zinc finger CCCH domain-containing protein 4 OS=Mus<br>musculus OX=10090 GN=Zc3h4 PE=1 SV=1                               | MOUSE | 8  |
| 1158 | 12.3  | 14.47 | 39.19 | 34.68 | tr Q0PD35 Q0PD35_<br>MOUSE             | Ras-related protein Rab-21 OS=Mus musculus OX=10090<br>GN=Rab21 PE=1 SV=1                                                 | MOUSE | 8  |
| 1159 | 12.3  | 12.49 | 20.55 | 8.13  | tr A0A0A0MQD1 A<br>0A0A0MQD1_MOUS<br>E | Tudor domain-containing protein 7 OS=Mus musculus<br>OX=10090 GN=Tdrd7 PE=1 SV=1                                          | MOUSE | 7  |
| 1160 | 12.29 | 12.48 | 16.74 | 10.40 | sp P98203 ARVC_M<br>OUSE               | Armadillo repeat protein deleted in velo-cardio-facial<br>syndrome homolog OS=Mus musculus OX=10090<br>GN=Arvcf PE=1 SV=2 | MOUSE | 8  |
| 1161 | 12.28 | 12.48 | 36.73 | 29.65 | sp Q91YJ3 THYN1_<br>MOUSE              | Thymocyte nuclear protein 1 OS=Mus musculus OX=10090<br>GN=Thyn1 PE=1 SV=1                                                | MOUSE | 7  |
| 1162 | 12.27 | 13.07 | 45.87 | 23.54 | sp Q3THG9 AASD1_<br>MOUSE              | Alanyl-tRNA editing protein Aarsd1 OS=Mus musculus<br>OX=10090 GN=Aarsd1 PE=1 SV=2                                        | MOUSE | 7  |
| 1163 | 12.27 | 12.66 | 28.53 | 20.16 | tr Q3UZ17 Q3UZ17_<br>MOUSE             | Uncharacterized protein OS=Mus musculus OX=10090<br>GN=Luc7l2 PE=2 SV=1                                                   | MOUSE | 6  |
| 1164 | 12.25 | 12.46 | 15.01 | 6.95  | sp Q9QY81 PO210_<br>MOUSE              | Nuclear pore membrane glycoprotein 210 OS=Mus<br>musculus OX=10090 GN=Nup210 PE=1 SV=2                                    | MOUSE | 8  |



|      |       |       |       |       |                                |                                                                                                            |       |    |
|------|-------|-------|-------|-------|--------------------------------|------------------------------------------------------------------------------------------------------------|-------|----|
| 1165 | 12.25 | 12.3  | 34.26 | 29.76 | tr Q9DBN7 Q9DBN7_MOUSE         | Uncharacterized protein OS=Mus musculus OX=10090 GN=Eci1 PE=2 SV=1                                         | MOUSE | 7  |
| 1166 | 12.24 | 12.25 | 59.66 | 42.05 | sp Q9DCS9 NDUBA_MOUSE          | NADH dehydrogenase [ubiquinone] 1 beta subcomplex subunit 10 OS=Mus musculus OX=10090 GN=Ndufb10 PE=1 SV=3 | MOUSE | 8  |
| 1167 | 12.22 | 12.39 | 32.51 | 26.11 | tr Q5M9M0 Q5M9M0_MOUSE         | 60S ribosomal protein L13a OS=Mus musculus OX=10090 GN=Rpl13a PE=1 SV=1                                    | MOUSE | 7  |
| 1168 | 12.2  | 12.34 | 27.29 | 20.26 | sp A2ASZ8 SCMC2_MOUSE          | Calcium-binding mitochondrial carrier protein SCaMC-2 OS=Mus musculus OX=10090 GN=Slc25a25 PE=1 SV=1       | MOUSE | 8  |
| 1169 | 12.19 | 12.53 | 22.73 | 13.08 | tr Q3TBF1 Q3TBF1_MOUSE         | Protein-arginine deiminase OS=Mus musculus OX=10090 GN=Padi2 PE=2 SV=1                                     | MOUSE | 8  |
| 1170 | 12.19 | 12.29 | 36.52 | 29.78 | sp Q9JM76 ARPC3_MOUSE          | Actin-related protein 2/3 complex subunit 3 OS=Mus musculus OX=10090 GN=Arpc3 PE=1 SV=3                    | MOUSE | 7  |
| 1171 | 12.18 | 12.28 | 30.00 | 27.71 | sp Q91YR1 TWF1_MOUSE           | Twinfilin-1 OS=Mus musculus OX=10090 GN=Twf1 PE=1 SV=2                                                     | MOUSE | 7  |
| 1172 | 12.17 | 12.34 | 19.00 | 11.93 | tr A0A0R4J049 A0A0R4J049_MOUSE | Protein arginine N-methyltransferase 5 OS=Mus musculus OX=10090 GN=Prmt5 PE=1 SV=1                         | MOUSE | 6  |
| 1173 | 12.14 | 13.22 | 10.72 | 5.46  | tr M0QWP1 M0QWP1_MOUSE         | Agrin OS=Mus musculus OX=10090 GN=Agrn PE=1 SV=1                                                           | MOUSE | 9  |
| 1174 | 12.14 | 12.15 | 30.67 | 23.47 | tr Q921W2 Q921W2_MOUSE         | Nucleolysin TIAR OS=Mus musculus OX=10090 GN=Tial1 PE=1 SV=1                                               | MOUSE | 6  |
| 1175 | 12.08 | 12.19 | 36.21 | 23.96 | sp Q99J77 SIAS_MOUSE           | Sialic acid synthase OS=Mus musculus OX=10090 GN=Nans PE=1 SV=1                                            | MOUSE | 8  |
| 1176 | 12.06 | 12.14 | 49.04 | 23.37 | tr Q544A1 Q544A1_MOUSE         | WW domain binding protein 2 OS=Mus musculus OX=10090 GN=Wbp2 PE=1 SV=1                                     | MOUSE | 7  |
| 1177 | 12.02 | 13.06 | 44.93 | 44.93 | tr Q7JCZ1 Q7JCZ1_MOUSE         | Cytochrome c oxidase subunit 2 OS=Mus musculus OX=10090 GN=mt-Co2 PE=1 SV=1                                | MOUSE | 7  |
| 1178 | 12.01 | 20.44 | 41.18 | 33.88 | sp Q60973 RBBP7_MOUSE          | Histone-binding protein RBBP7 OS=Mus musculus OX=10090 GN=Rbbp7 PE=1 SV=1                                  | MOUSE | 10 |
| 1179 | 12.01 | 12.15 | 37.14 | 26.00 | sp Q3UMR5 MCU_MOUSE            | Calcium uniporter protein, mitochondrial OS=Mus musculus OX=10090 GN=Mcu PE=1 SV=2                         | MOUSE | 7  |
| 1180 | 12.01 | 12.01 | 44.04 | 38.07 | tr Q3URG1 Q3URG1_MOUSE         | Uncharacterized protein OS=Mus musculus OX=10090 GN=Tppp PE=1 SV=1                                         | MOUSE | 6  |

|      |       |       |       |       |                        |                                                                                                             |       |   |
|------|-------|-------|-------|-------|------------------------|-------------------------------------------------------------------------------------------------------------|-------|---|
| 1181 | 12    | 12    | 61.73 | 61.73 | tr Q8C1L7 Q8C1L7_MOUSE | 40S ribosomal protein S21 OS=Mus musculus OX=10090 PE=2 SV=1                                                | MOUSE | 7 |
| 1182 | 12    | 12    | 26.21 | 26.21 | tr Q9CXY0 Q9CXY0_MOUSE | Small monomeric GTPase OS=Mus musculus OX=10090 GN=Rala PE=2 SV=1                                           | MOUSE | 6 |
| 1183 | 12    | 12    | 54.55 | 54.55 | tr Q5BLK0 Q5BLK0_MOUSE | 60S ribosomal protein L12 OS=Mus musculus OX=10090 GN=Rpl12 PE=1 SV=1                                       | MOUSE | 6 |
| 1184 | 12    | 12    | 31.75 | 31.75 | sp Q9DCC4 P5CR3_MOUSE  | Pyrroline-5-carboxylate reductase 3 OS=Mus musculus OX=10090 GN=Pyrc3 PE=1 SV=2                             | MOUSE | 8 |
| 1185 | 11.99 | 12.44 | 42.78 | 36.26 | sp Q99JB2 STML2_MOUSE  | Stomatin-like protein 2, mitochondrial OS=Mus musculus OX=10090 GN=Stoml2 PE=1 SV=1                         | MOUSE | 7 |
| 1186 | 11.98 | 12.04 | 36.52 | 36.17 | sp Q8K4Z3 NNRE_MOUSE   | NAD(P)H-hydrate epimerase OS=Mus musculus OX=10090 GN=Naxe PE=1 SV=1                                        | MOUSE | 7 |
| 1187 | 11.95 | 12.01 | 43.18 | 33.52 | tr Q3THJ0 Q3THJ0_MOUSE | 60S ribosomal protein L18a OS=Mus musculus OX=10090 GN=Rpl18a PE=2 SV=1                                     | MOUSE | 6 |
| 1188 | 11.93 | 12.08 | 18.13 | 8.28  | tr Q3UF95 Q3UF95_MOUSE | BCL2-associated athanogene 6 OS=Mus musculus OX=10090 GN=Bag6 PE=1 SV=1                                     | MOUSE | 7 |
| 1189 | 11.92 | 12.13 | 32.62 | 21.51 | tr Q3UG16 Q3UG16_MOUSE | Uncharacterized protein OS=Mus musculus OX=10090 GN=Ap1m1 PE=1 SV=1                                         | MOUSE | 7 |
| 1190 | 11.92 | 12.09 | 22.24 | 14.02 | tr Q542C3 Q542C3_MOUSE | Uncharacterized protein OS=Mus musculus OX=10090 GN=Pcif1 PE=1 SV=1                                         | MOUSE | 7 |
| 1191 | 11.9  | 12.4  | 30.40 | 12.16 | tr Q3UN55 Q3UN55_MOUSE | Carn_acyltransf domain-containing protein OS=Mus musculus OX=10090 GN=Cpt2 PE=2 SV=1                        | MOUSE | 7 |
| 1192 | 11.9  | 11.97 | 36.36 | 36.36 | sp Q6P069 SORCN_MOUSE  | Sorcin OS=Mus musculus OX=10090 GN=Sri PE=1 SV=1                                                            | MOUSE | 7 |
| 1193 | 11.88 | 12.1  | 13.69 | 7.13  | tr Q3U4M7 Q3U4M7_MOUSE | Tripeptidyl-peptidase 2 OS=Mus musculus OX=10090 GN=Thpp2 PE=2 SV=1                                         | MOUSE | 7 |
| 1194 | 11.88 | 12.04 | 21.64 | 18.04 | sp Q8CCF0 PRP31_MOUSE  | U4/U6 small nuclear ribonucleoprotein Prp31 OS=Mus musculus OX=10090 GN=Prpf31 PE=1 SV=3                    | MOUSE | 7 |
| 1195 | 11.84 | 11.94 | 41.48 | 40.61 | sp Q61206 PA1B2_MOUSE  | Platelet-activating factor acetylhydrolase IB subunit alpha2 OS=Mus musculus OX=10090 GN=Pafah1b2 PE=1 SV=2 | MOUSE | 7 |
| 1196 | 11.83 | 11.89 | 43.22 | 38.19 | tr Q3UWU7 Q3UWU7_MOUSE | Uncharacterized protein OS=Mus musculus OX=10090 GN=Diras2 PE=1 SV=1                                        | MOUSE | 6 |

|      |       |       |       |       |                        |                                                                                                      |       |    |
|------|-------|-------|-------|-------|------------------------|------------------------------------------------------------------------------------------------------|-------|----|
| 1197 | 11.81 | 13.02 | 48.97 | 37.46 | tr Q3UFX6 Q3UFX6_MOUSE | Hydrolase_4 domain-containing protein OS=Mus musculus<br>OX=10090 GN=Mgll PE=2 SV=1                  | MOUSE | 8  |
| 1198 | 11.8  | 11.96 | 32.09 | 25.86 | sp Q8CHP8 PGP_MOUSE    | Glycerol-3-phosphate phosphatase OS=Mus musculus<br>OX=10090 GN=Pgp PE=1 SV=1                        | MOUSE | 7  |
| 1199 | 11.78 | 12.04 | 27.04 | 17.60 | sp Q8BMA6 SRP68_MOUSE  | Signal recognition particle subunit SRP68 OS=Mus musculus<br>OX=10090 GN=Srp68 PE=1 SV=2             | MOUSE | 8  |
| 1200 | 11.78 | 11.81 | 45.12 | 37.67 | tr N0E4C0 N0E4C0_MOUSE | Casein kinase II subunit beta OS=Mus musculus OX=10090<br>GN=Csnk2b PE=2 SV=1                        | MOUSE | 6  |
| 1201 | 11.76 | 11.81 | 59.84 | 50.39 | sp Q9D023 MPC2_MOUSE   | Mitochondrial pyruvate carrier 2 OS=Mus musculus<br>OX=10090 GN=Mpc2 PE=1 SV=1                       | MOUSE | 6  |
| 1202 | 11.73 | 11.82 | 60.71 | 60.71 | tr Q9D0J2 Q9D0J2_MOUSE | ATP synthase F1 subunit delta OS=Mus musculus<br>OX=10090 GN=Atp5d PE=2 SV=1                         | MOUSE | 13 |
| 1203 | 11.73 | 11.8  | 61.86 | 49.15 | tr Q14AF6 Q14AF6_MOUSE | Small nuclear ribonucleoprotein Sm D2 OS=Mus musculus<br>OX=10090 GN=Snrpd2 PE=1 SV=1                | MOUSE | 8  |
| 1204 | 11.72 | 11.81 | 38.02 | 31.14 | sp Q99LB6 MAT2B_MOUSE  | Methionine adenosyltransferase 2 subunit beta OS=Mus musculus<br>OX=10090 GN=Mat2b PE=1 SV=1         | MOUSE | 7  |
| 1205 | 11.7  | 11.86 | 75.93 | 63.89 | tr Q5I0U7 Q5I0U7_MOUSE | Tubulin-specific chaperone A OS=Mus musculus OX=10090<br>GN=Tbca PE=1 SV=1                           | MOUSE | 7  |
| 1206 | 11.69 | 14.87 | 46.00 | 29.43 | tr Q545V8 Q545V8_MOUSE | Protein kinase domain-containing protein OS=Mus musculus<br>OX=10090 GN=Csnk2a2 PE=1 SV=1            | MOUSE | 10 |
| 1207 | 11.69 | 11.77 | 25.56 | 22.78 | sp Q80SY6 ADAL_MOUSE   | Adenosine deaminase-like protein OS=Mus musculus<br>OX=10090 GN=Adal PE=2 SV=1                       | MOUSE | 6  |
| 1208 | 11.67 | 14.41 | 32.97 | 21.98 | tr Q922I7 Q922I7_MOUSE | Polypyrimidine tract-binding protein 1 OS=Mus musculus<br>OX=10090 GN=Ptbp1 PE=1 SV=1                | MOUSE | 10 |
| 1209 | 11.67 | 11.72 | 31.28 | 28.19 | tr Q9CWX0 Q9CWX0_MOUSE | 60S ribosomal protein L14 OS=Mus musculus OX=10090<br>GN=Rpl14 PE=2 SV=1                             | MOUSE | 7  |
| 1210 | 11.66 | 11.85 | 23.93 | 10.62 | sp Q3UNH4 GRIN1_MOUSE  | G protein-regulated inducer of neurite outgrowth 1<br>OS=Mus musculus OX=10090 GN=Gprin1 PE=1 SV=2   | MOUSE | 7  |
| 1211 | 11.66 | 11.75 | 37.62 | 27.33 | tr Q6GTX3 Q6GTX3_MOUSE | Apoe protein OS=Mus musculus OX=10090 GN=Apoe PE=2<br>SV=1                                           | MOUSE | 7  |
| 1212 | 11.65 | 11.75 | 31.54 | 14.23 | sp Q99K28 ARFG2_MOUSE  | ADP-ribosylation factor GTPase-activating protein 2<br>OS=Mus musculus OX=10090 GN=Arfgap2 PE=1 SV=1 | MOUSE | 5  |

|      |       |       |       |       |                                |                                                                                                             |       |   |
|------|-------|-------|-------|-------|--------------------------------|-------------------------------------------------------------------------------------------------------------|-------|---|
| 1213 | 11.65 | 11.7  | 11.91 | 7.78  | tr A0A0R4J0D3 A0A0R4J0D3_MOUSE | Dolichyl-diphosphooligosaccharide--protein glycotransferase OS=Mus musculus OX=10090 GN=Stt3b PE=1 SV=1     | MOUSE | 6 |
| 1214 | 11.64 | 11.66 | 40.80 | 40.30 | sp Q8VBV8 GUC1B_MOUSE          | Guanylyl cyclase-activating protein 2 OS=Mus musculus OX=10090 GN=Guca1b PE=1 SV=3                          | MOUSE | 6 |
| 1215 | 11.63 | 11.84 | 7.26  | 4.99  | tr E9QAI5 E9QAI5_MOUSE         | Aspartate carbamoyltransferase OS=Mus musculus OX=10090 GN=Cad PE=1 SV=1                                    | MOUSE | 8 |
| 1216 | 11.63 | 11.75 | 51.82 | 42.34 | sp Q9ER00 STX12_MOUSE          | Syntaxin-12 OS=Mus musculus OX=10090 GN=Stx12 PE=1 SV=1                                                     | MOUSE | 7 |
| 1217 | 11.63 | 11.75 | 30.03 | 23.21 | sp Q8BGF6 ELMD2_MOUSE          | ELMO domain-containing protein 2 OS=Mus musculus OX=10090 GN=Elmod2 PE=1 SV=1                               | MOUSE | 8 |
| 1218 | 11.62 | 11.82 | 25.82 | 22.35 | sp Q9CPY7 AMPL_MOUSE           | Cytosol aminopeptidase OS=Mus musculus OX=10090 GN=Lap3 PE=1 SV=3                                           | MOUSE | 8 |
| 1219 | 11.6  | 11.64 | 33.04 | 32.60 | sp Q7TNE3 SPAG7_MOUSE          | Sperm-associated antigen 7 OS=Mus musculus OX=10090 GN=Spag7 PE=1 SV=1                                      | MOUSE | 6 |
| 1220 | 11.59 | 11.86 | 23.36 | 17.03 | tr Q3UQN3 Q3UQN3_MOUSE         | UV excision repair protein RAD23 OS=Mus musculus OX=10090 GN=Rad23b PE=2 SV=1                               | MOUSE | 6 |
| 1221 | 11.57 | 11.62 | 41.60 | 41.60 | tr Q9CY93 Q9CY93_MOUSE         | 60S ribosomal protein L31 OS=Mus musculus OX=10090 GN=Rpl31 PE=2 SV=1                                       | MOUSE | 6 |
| 1222 | 11.56 | 11.74 | 38.75 | 31.83 | tr Q9D375 Q9D375_MOUSE         | AB hydrolase-1 domain-containing protein OS=Mus musculus OX=10090 GN=Abhd6 PE=2 SV=1                        | MOUSE | 7 |
| 1223 | 11.55 | 11.6  | 64.04 | 64.04 | sp Q9D0M5 DYL2_MOUSE           | Dynein light chain 2, cytoplasmic OS=Mus musculus OX=10090 GN=Dynll2 PE=1 SV=1                              | MOUSE | 8 |
| 1224 | 11.54 | 13.74 | 47.93 | 45.16 | sp Q80UU9 PGRC2_MOUSE          | Membrane-associated progesterone receptor component 2 OS=Mus musculus OX=10090 GN=Pgrmc2 PE=1 SV=2          | MOUSE | 7 |
| 1225 | 11.53 | 11.63 | 31.55 | 28.71 | tr Q8R5C0 Q8R5C0_MOUSE         | Metaxin OS=Mus musculus OX=10090 GN=Mtx1 PE=1 SV=1                                                          | MOUSE | 7 |
| 1226 | 11.52 | 11.73 | 32.79 | 28.37 | tr K4DI58 K4DI58_MOUSE         | Cell adhesion molecule 3 OS=Mus musculus OX=10090 GN=Cadm3 PE=1 SV=1                                        | MOUSE | 6 |
| 1227 | 11.5  | 11.55 | 16.04 | 14.06 | sp Q9DCP2 S38A3_MOUSE          | Sodium-coupled neutral amino acid transporter 3 OS=Mus musculus OX=10090 GN=Slc38a3 PE=1 SV=1               | MOUSE | 7 |
| 1228 | 11.49 | 11.62 | 58.33 | 41.67 | sp Q9ERS2 NDUAD_MOUSE          | NADH dehydrogenase [ubiquinone] 1 alpha subcomplex subunit 13 OS=Mus musculus OX=10090 GN=Ndufa13 PE=1 SV=3 | MOUSE | 6 |

|      |       |       |       |       |                        |                                                                                                                 |       |   |
|------|-------|-------|-------|-------|------------------------|-----------------------------------------------------------------------------------------------------------------|-------|---|
| 1229 | 11.47 | 11.54 | 43.78 | 31.84 | sp Q9R1P3 PSB2_MOUSE   | Proteasome subunit beta type-2 OS=Mus musculus<br>OX=10090 GN=Psm2 PE=1 SV=1                                    | MOUSE | 9 |
| 1230 | 11.46 | 11.56 | 50.78 | 39.90 | sp P84075 HPCA_MOUSE   | Neuron-specific calcium-binding protein hippocalcin<br>OS=Mus musculus OX=10090 GN=Hpca PE=1 SV=2               | MOUSE | 7 |
| 1231 | 11.46 | 11.52 | 72.09 | 53.49 | sp P56391 CX6B1_MOUSE  | Cytochrome c oxidase subunit 6B1 OS=Mus musculus<br>OX=10090 GN=Cox6b1 PE=1 SV=2                                | MOUSE | 7 |
| 1232 | 11.45 | 11.52 | 29.82 | 29.82 | sp Q7TNV1 TLC3B_MOUSE  | Ceramide synthase OS=Mus musculus OX=10090<br>GN=Tlcd3b PE=1 SV=2                                               | MOUSE | 7 |
| 1233 | 11.44 | 11.58 | 44.53 | 26.04 | sp Q8BWM0 PGES2_MOUSE  | Prostaglandin E synthase 2 OS=Mus musculus OX=10090<br>GN=Ptges2 PE=1 SV=3                                      | MOUSE | 6 |
| 1234 | 11.41 | 11.56 | 36.07 | 23.93 | sp Q9DB73 NB5R1_MOUSE  | NADH-cytochrome b5 reductase 1 OS=Mus musculus<br>OX=10090 GN=Cyb5r1 PE=1 SV=1                                  | MOUSE | 6 |
| 1235 | 11.4  | 11.51 | 14.40 | 11.46 | tr Q3UGC0 Q3UGC0_MOUSE | RRM domain-containing protein OS=Mus musculus<br>OX=10090 GN=Eif4b PE=2 SV=1                                    | MOUSE | 6 |
| 1236 | 11.4  | 11.48 | 65.05 | 55.34 | sp Q9CPQ8 ATP5L_MOUSE  | ATP synthase subunit g, mitochondrial OS=Mus musculus<br>OX=10090 GN=Atp5mg PE=1 SV=1                           | MOUSE | 8 |
| 1237 | 11.38 | 11.5  | 39.40 | 28.53 | sp Q8C163 EXOG_MOUSE   | Nuclease EXOG, mitochondrial OS=Mus musculus<br>OX=10090 GN=Exog PE=1 SV=1                                      | MOUSE | 6 |
| 1238 | 11.37 | 11.54 | 21.09 | 11.29 | sp Q9Z315 SNUT1_MOUSE  | U4/U6.U5 tri-snRNP-associated protein 1 OS=Mus musculus<br>OX=10090 GN=Sart1 PE=1 SV=1                          | MOUSE | 7 |
| 1239 | 11.37 | 11.43 | 35.92 | 31.39 | sp Q8WTY4 CPIN1_MOUSE  | Anamorsin OS=Mus musculus OX=10090 GN=Ciapi1 PE=1<br>SV=1                                                       | MOUSE | 7 |
| 1240 | 11.36 | 11.72 | 58.78 | 58.78 | sp Q9CQZ5 NDUA6_MOUSE  | NADH dehydrogenase [ubiquinone] 1 alpha subcomplex<br>subunit 6 OS=Mus musculus OX=10090 GN=Ndufa6 PE=1<br>SV=1 | MOUSE | 8 |
| 1241 | 11.33 | 11.62 | 20.65 | 7.22  | sp Q6ZPJ3 UBE2O_MOUSE  | (E3-independent) E2 ubiquitin-conjugating enzyme UBE2O<br>OS=Mus musculus OX=10090 GN=Ube2o PE=1 SV=3           | MOUSE | 6 |
| 1242 | 11.33 | 11.38 | 18.26 | 16.17 | sp Q80VP1 EPN1_MOUSE   | Epsin-1 OS=Mus musculus OX=10090 GN=Epn1 PE=1 SV=3                                                              | MOUSE | 6 |
| 1243 | 11.3  | 11.4  | 32.92 | 27.08 | tr Q9DCY6 Q9DCY6_MOUSE | Glutathione transferase OS=Mus musculus OX=10090<br>GN=Gstt1 PE=2 SV=1                                          | MOUSE | 6 |
| 1244 | 11.3  | 11.34 | 38.22 | 15.61 | sp Q62277 SYPH_MOUSE   | Synaptophysin OS=Mus musculus OX=10090 GN=Syp PE=1<br>SV=2                                                      | MOUSE | 6 |

|      |       |       |       |       |                                |                                                                                                        |       |     |
|------|-------|-------|-------|-------|--------------------------------|--------------------------------------------------------------------------------------------------------|-------|-----|
| 1245 | 11.29 | 95.6  | 87.61 | 86.94 | sp P99024 TBB5_MOUSE           | Tubulin beta-5 chain OS=Mus musculus OX=10090<br>GN=Tubb5 PE=1 SV=1                                    | MOUSE | 133 |
| 1246 | 11.28 | 11.36 | 37.22 | 28.16 | sp Q9CR26 VTA1_MOUSE           | Vacuolar protein sorting-associated protein VTA1 homolog<br>OS=Mus musculus OX=10090 GN=Vta1 PE=1 SV=1 | MOUSE | 6   |
| 1247 | 11.19 | 11.25 | 42.01 | 32.34 | tr Q9CZL0 Q9CZL0_MOUSE         | GOLD domain-containing protein OS=Mus musculus<br>OX=10090 GN=Tmed9 PE=2 SV=1                          | MOUSE | 7   |
| 1248 | 11.18 | 13.42 | 54.48 | 37.31 | tr Q3U4H0 Q3U4H0_MOUSE         | APC-binding protein EB1 OS=Mus musculus OX=10090<br>GN=Mapre1 PE=1 SV=1                                | MOUSE | 8   |
| 1249 | 11.17 | 14.8  | 30.07 | 15.73 | sp Q61699 HS105_MOUSE          | Heat shock protein 105 kDa OS=Mus musculus OX=10090<br>GN=Hsph1 PE=1 SV=2                              | MOUSE | 9   |
| 1250 | 11.16 | 11.19 | 51.32 | 51.32 | sp Q9CPQ1 COX6C_MOUSE          | Cytochrome c oxidase subunit 6C OS=Mus musculus<br>OX=10090 GN=Cox6c PE=1 SV=3                         | MOUSE | 8   |
| 1251 | 11.14 | 11.2  | 58.28 | 41.72 | tr Q642K0 Q642K0_MOUSE         | Myl6 protein OS=Mus musculus OX=10090 GN=Myl6 PE=2<br>SV=1                                             | MOUSE | 5   |
| 1252 | 11.13 | 11.27 | 43.32 | 28.97 | tr Q5NTY0 Q5NTY0_MOUSE         | DnaJ (Hsp40) homolog, subfamily A, member 1 OS=Mus<br>musculus OX=10090 GN=Dnaja1 PE=1 SV=1            | MOUSE | 7   |
| 1253 | 11.13 | 11.22 | 33.81 | 30.58 | tr A2RTC8 A2RTC8_MOUSE         | Membrane-associated ring finger (C3HC4) 5 OS=Mus<br>musculus OX=10090 GN=Marchf5 PE=1 SV=1             | MOUSE | 6   |
| 1254 | 11.13 | 11.18 | 33.90 | 29.30 | tr A0A0R4J0X5 A0A0R4J0X5_MOUSE | Alpha-1-antitrypsin 1-3 OS=Mus musculus OX=10090<br>GN=Serpina1c PE=1 SV=1                             | MOUSE | 7   |
| 1255 | 11.12 | 11.24 | 36.85 | 13.95 | sp Q5U458 DJC11_MOUSE          | DnaJ homolog subfamily C member 11 OS=Mus musculus<br>OX=10090 GN=Dnajc11 PE=1 SV=2                    | MOUSE | 5   |
| 1256 | 11.12 | 11.22 | 38.05 | 31.99 | sp Q99J99 THTM_MOUSE           | 3-mercaptopyruvate sulfurtransferase OS=Mus musculus<br>OX=10090 GN=Mpst PE=1 SV=4                     | MOUSE | 6   |
| 1257 | 11.1  | 11.4  | 21.44 | 7.70  | sp Q8K212 PACS1_MOUSE          | Phosphofurin acidic cluster sorting protein 1 OS=Mus<br>musculus OX=10090 GN=Pacs1 PE=1 SV=2           | MOUSE | 6   |
| 1258 | 11.08 | 11.23 | 41.27 | 34.29 | tr Q544R7 Q544R7_MOUSE         | Heme oxygenase OS=Mus musculus OX=10090 GN=Hmox2<br>PE=1 SV=1                                          | MOUSE | 7   |
| 1259 | 11.07 | 11.45 | 30.81 | 24.59 | sp Q8CG72 ADPRS_MOUSE          | ADP-ribose glycohydrolase ARH3 OS=Mus musculus<br>OX=10090 GN=Adprs PE=1 SV=1                          | MOUSE | 6   |
| 1260 | 11.07 | 11.21 | 64.94 | 64.94 | tr Q561N4 Q561N4_MOUSE         | Ubiquitin-conjugating enzyme E2L 3 OS=Mus musculus<br>OX=10090 GN=Ube2l3 PE=1 SV=1                     | MOUSE | 8   |

|      |       |       |       |       |                                |                                                                                                                           |       |   |
|------|-------|-------|-------|-------|--------------------------------|---------------------------------------------------------------------------------------------------------------------------|-------|---|
| 1261 | 11.07 | 11.19 | 31.15 | 21.90 | sp Q60749 KHDR1_MOUSE          | KH domain-containing, RNA-binding, signal transduction-associated protein 1 OS=Mus musculus OX=10090 GN=Khdrbs1 PE=1 SV=2 | MOUSE | 7 |
| 1262 | 11.06 | 11.14 | 42.34 | 31.98 | sp P24472 GSTA4_MOUSE          | Glutathione S-transferase A4 OS=Mus musculus OX=10090 GN=Gsta4 PE=1 SV=3                                                  | MOUSE | 7 |
| 1263 | 11.06 | 11.13 | 81.61 | 70.11 | tr Q548W7 Q548W7_MOUSE         | Diazepam binding inhibitor OS=Mus musculus OX=10090 GN=Dbi PE=1 SV=1                                                      | MOUSE | 7 |
| 1264 | 11.04 | 11.18 | 32.42 | 21.16 | sp Q5M8N4 D39U1_MOUSE          | Epimerase family protein SDR39U1 OS=Mus musculus OX=10090 GN=Sdr39u1 PE=1 SV=2                                            | MOUSE | 5 |
| 1265 | 11.04 | 11.14 | 33.02 | 22.12 | tr Q5HZI6 Q5HZI6_MOUSE         | GDP-4-keto-6-deoxy-D-mannose-3,5-epimerase-4-reductase OS=Mus musculus OX=10090 GN=Gfus PE=1 SV=1                         | MOUSE | 6 |
| 1266 | 11.03 | 12.16 | 19.52 | 8.47  | tr Q14BH8 Q14BH8_MOUSE         | Cacna2d1 protein OS=Mus musculus OX=10090 GN=Cacna2d1 PE=2 SV=1                                                           | MOUSE | 8 |
| 1267 | 11.03 | 11.07 | 65.49 | 63.72 | tr Q4V9T8 Q4V9T8_MOUSE         | Eukaryotic translation initiation factor 1 OS=Mus musculus OX=10090 GN=Eif1 PE=1 SV=1                                     | MOUSE | 7 |
| 1268 | 11.02 | 11.14 | 32.84 | 27.46 | tr A0A0R4J1Y3 A0A0R4J1Y3_MOUSE | Probable tRNA N6-adenosine threonylcarbamoyltransferase OS=Mus musculus OX=10090 GN=Osgep PE=1 SV=1                       | MOUSE | 6 |
| 1269 | 11.02 | 11.09 | 15.53 | 15.53 | sp Q9JKF6 NECT1_MOUSE          | Nectin-1 OS=Mus musculus OX=10090 GN=Nectin1 PE=1 SV=3                                                                    | MOUSE | 7 |
| 1270 | 11    | 11.43 | 58.05 | 39.51 | tr Q545G0 Q545G0_MOUSE         | Proteasome subunit beta OS=Mus musculus OX=10090 GN=Psm3 PE=1 SV=1                                                        | MOUSE | 6 |
| 1271 | 10.96 | 13.19 | 42.15 | 29.12 | sp P12658 CALB1_MOUSE          | Calbindin OS=Mus musculus OX=10090 GN=Calb1 PE=1 SV=2                                                                     | MOUSE | 7 |
| 1272 | 10.95 | 11.07 | 23.37 | 9.60  | tr Q3TET2 Q3TET2_MOUSE         | Glycerol kinase OS=Mus musculus OX=10090 GN=Gk PE=2 SV=1                                                                  | MOUSE | 5 |
| 1273 | 10.95 | 11    | 40.20 | 30.39 | tr Q5M8Q0 Q5M8Q0_MOUSE         | Ribosomal protein L15 OS=Mus musculus OX=10090 GN=Rpl15 PE=2 SV=1                                                         | MOUSE | 6 |
| 1274 | 10.93 | 11.08 | 44.49 | 35.24 | sp Q9CRB9 MIC19_MOUSE          | MICOS complex subunit Mic19 OS=Mus musculus OX=10090 GN=Chchd3 PE=1 SV=1                                                  | MOUSE | 6 |
| 1275 | 10.93 | 10.98 | 38.21 | 26.57 | tr Q4FJK0 Q4FJK0_MOUSE         | Decr1 protein OS=Mus musculus OX=10090 GN=Decr1 PE=1 SV=1                                                                 | MOUSE | 6 |

|      |       |       |       |       |                                |                                                                                                   |       |   |
|------|-------|-------|-------|-------|--------------------------------|---------------------------------------------------------------------------------------------------|-------|---|
| 1276 | 10.92 | 11.12 | 12.59 | 4.63  | tr A2AM56 A2AM56_MOUSE         | ATP-binding cassette, sub-family A (ABC1), member 8b OS=Mus musculus OX=10090 GN=Abca8b PE=2 SV=1 | MOUSE | 6 |
| 1277 | 10.92 | 11.11 | 25.76 | 17.24 | tr A0A2I3BRL0 A0A2I3BRL0_MOUSE | 5'-nucleotidase domain-containing 2 OS=Mus musculus OX=10090 GN=Nt5dc2 PE=1 SV=1                  | MOUSE | 6 |
| 1278 | 10.92 | 11.02 | 21.80 | 19.89 | tr Q8CHR8 Q8CHR8_MOUSE         | Developmentally regulated GTP binding protein 1 OS=Mus musculus OX=10090 GN=Drg1 PE=2 SV=1        | MOUSE | 7 |
| 1279 | 10.91 | 10.99 | 16.89 | 13.83 | sp Q6R891 NEB2_MOUSE           | Neurabin-2 OS=Mus musculus OX=10090 GN=Ppp1r9b PE=1 SV=1                                          | MOUSE | 6 |
| 1280 | 10.9  | 11.02 | 22.58 | 18.55 | tr Q3UJC3 Q3UJC3_MOUSE         | Glycylpeptide N-tetradecanoyltransferase OS=Mus musculus OX=10090 GN=Nmt1 PE=1 SV=1               | MOUSE | 8 |
| 1281 | 10.88 | 10.93 | 35.51 | 17.23 | tr Q8BSH9 Q8BSH9_MOUSE         | Nucleosome assembly protein 1-like 1 OS=Mus musculus OX=10090 GN=Nap1l1 PE=1 SV=1                 | MOUSE | 8 |
| 1282 | 10.85 | 11    | 22.00 | 17.16 | tr Q3UKQ3 Q3UKQ3_MOUSE         | Uncharacterized protein OS=Mus musculus OX=10090 GN=Wbp11 PE=2 SV=1                               | MOUSE | 6 |
| 1283 | 10.85 | 10.89 | 39.29 | 39.29 | sp P62830 RL23_MOUSE           | 60S ribosomal protein L23 OS=Mus musculus OX=10090 GN=Rpl23 PE=1 SV=1                             | MOUSE | 6 |
| 1284 | 10.84 | 10.95 | 32.75 | 27.87 | tr A0A3B2W864 A0A3B2W864_MOUSE | Predicted gene, 49804 OS=Mus musculus OX=10090 GN=Gm49804 PE=3 SV=1                               | MOUSE | 6 |
| 1285 | 10.82 | 10.97 | 17.40 | 7.65  | sp Q8C7X2-2 EMC1_MOUSE         | Isoform 2 of ER membrane protein complex subunit 1 OS=Mus musculus OX=10090 GN=Emc1               | MOUSE | 5 |
| 1286 | 10.79 | 10.84 | 26.77 | 20.87 | tr Q8C671 Q8C671_MOUSE         | Serine/arginine-rich splicing factor 2 OS=Mus musculus OX=10090 GN=Srsf2 PE=2 SV=1                | MOUSE | 6 |
| 1287 | 10.78 | 10.85 | 40.00 | 39.05 | tr Q6ZWZ4 Q6ZWZ4_MOUSE         | 60S ribosomal protein L36 OS=Mus musculus OX=10090 GN=Rpl36 PE=1 SV=1                             | MOUSE | 7 |
| 1288 | 10.77 | 11.16 | 18.95 | 7.27  | sp Q9EPK7 XPO7_MOUSE           | Exportin-7 OS=Mus musculus OX=10090 GN=Xpo7 PE=1 SV=3                                             | MOUSE | 6 |
| 1289 | 10.75 | 11.86 | 23.12 | 14.73 | sp Q8K3K8 OPTN_MOUSE           | Optineurin OS=Mus musculus OX=10090 GN=Optn PE=1 SV=1                                             | MOUSE | 7 |
| 1290 | 10.75 | 11.3  | 25.49 | 13.39 | tr Q922A2 Q922A2_MOUSE         | Annexin OS=Mus musculus OX=10090 GN=Anxa7 PE=2 SV=1                                               | MOUSE | 5 |
| 1291 | 10.75 | 10.95 | 45.73 | 18.48 | tr Q8BX12 Q8BX12_MOUSE         | Uncharacterized protein (Fragment) OS=Mus musculus OX=10090 GN=Ncoa5 PE=2 SV=1                    | MOUSE | 8 |
| 1292 | 10.74 | 15.2  | 30.87 | 18.67 | tr Q3TM70 Q3TM70_MOUSE         | Uncharacterized protein OS=Mus musculus OX=10090 GN=Ehd4 PE=1 SV=1                                | MOUSE | 8 |



|      |       |       |       |       |                        |                                                                                                     |       |    |
|------|-------|-------|-------|-------|------------------------|-----------------------------------------------------------------------------------------------------|-------|----|
| 1293 | 10.73 | 10.82 | 34.21 | 26.56 | sp Q3TMH2 SCRN3_MOUSE  | Secernin-3 OS=Mus musculus OX=10090 GN=Scrn3 PE=1 SV=1                                              | MOUSE | 6  |
| 1294 | 10.72 | 10.91 | 29.58 | 21.73 | sp Q8VE88 F1142_MOUSE  | Protein FAM114A2 OS=Mus musculus OX=10090 GN=Fam114a2 PE=1 SV=2                                     | MOUSE | 6  |
| 1295 | 10.71 | 17.5  | 36.01 | 23.55 | sp Q64332 SYN2_MOUSE   | Synapsin-2 OS=Mus musculus OX=10090 GN=Syn2 PE=1 SV=2                                               | MOUSE | 11 |
| 1296 | 10.71 | 10.82 | 21.58 | 15.45 | tr Q3UYP2 Q3UYP2_MOUSE | Prenylcys_lyase domain-containing protein OS=Mus musculus OX=10090 GN=Pcyox1 PE=2 SV=1              | MOUSE | 6  |
| 1297 | 10.7  | 10.86 | 34.35 | 22.44 | sp Q9D5T0 ATAD1_MOUSE  | Outer mitochondrial transmembrane helix translocase OS=Mus musculus OX=10090 GN=Atad1 PE=1 SV=1     | MOUSE | 7  |
| 1298 | 10.7  | 10.84 | 48.26 | 48.26 | sp Q3THE2 ML12B_MOUSE  | Myosin regulatory light chain 12B OS=Mus musculus OX=10090 GN=My12b PE=1 SV=2                       | MOUSE | 7  |
| 1299 | 10.69 | 11.01 | 14.48 | 7.84  | tr B2RQC7 B2RQC7_MOUSE | DIP2 disco-interacting protein 2 homolog B (Drosophila) OS=Mus musculus OX=10090 GN=Dip2b PE=1 SV=1 | MOUSE | 7  |
| 1300 | 10.65 | 16.16 | 39.71 | 29.43 | sp Q8BWG8 ARRB1_MOUSE  | Beta-arrestin-1 OS=Mus musculus OX=10090 GN=Arrb1 PE=1 SV=1                                         | MOUSE | 9  |
| 1301 | 10.63 | 10.8  | 29.43 | 22.49 | tr Q3U944 Q3U944_MOUSE | L-type lectin-like domain-containing protein OS=Mus musculus OX=10090 GN=Lman1 PE=2 SV=1            | MOUSE | 9  |
| 1302 | 10.61 | 10.79 | 19.37 | 9.81  | tr Q3TWN8 Q3TWN8_MOUSE | Delta-1-pyrroline-5-carboxylate synthase OS=Mus musculus OX=10090 GN=Aldh18a1 PE=2 SV=1             | MOUSE | 6  |
| 1303 | 10.6  | 12.81 | 57.32 | 36.59 | tr Q9D6W4 Q9D6W4_MOUSE | RRM domain-containing protein OS=Mus musculus OX=10090 GN=Srsf3 PE=2 SV=1                           | MOUSE | 12 |
| 1304 | 10.6  | 10.76 | 65.66 | 54.55 | tr Q99JZ4 Q99JZ4_MOUSE | GTP-binding protein SAR1a OS=Mus musculus OX=10090 GN=Sar1a PE=1 SV=1                               | MOUSE | 6  |
| 1305 | 10.59 | 12.81 | 23.78 | 23.48 | tr A2AEG6 A2AEG6_MOUSE | Neuronal membrane glycoprotein M6-b OS=Mus musculus OX=10090 GN=Gpm6b PE=1 SV=1                     | MOUSE | 10 |
| 1306 | 10.58 | 27.95 | 50.26 | 47.89 | sp Q63844 MK03_MOUSE   | Mitogen-activated protein kinase 3 OS=Mus musculus OX=10090 GN=Mapk3 PE=1 SV=5                      | MOUSE | 15 |
| 1307 | 10.55 | 10.66 | 72.48 | 63.76 | sp P0DP28 CALM3_MOUSE  | Calmodulin-3 OS=Mus musculus OX=10090 GN=Calm3 PE=1 SV=1                                            | MOUSE | 10 |
| 1308 | 10.54 | 10.66 | 26.51 | 14.26 | sp Q9CZX0 ELP3_MOUSE   | Elongator complex protein 3 OS=Mus musculus OX=10090 GN=Elp3 PE=1 SV=1                              | MOUSE | 6  |
| 1309 | 10.52 | 10.73 | 16.71 | 10.14 | sp B2RY56 RBM25_MOUSE  | RNA-binding protein 25 OS=Mus musculus OX=10090 GN=Rbm25 PE=1 SV=2                                  | MOUSE | 7  |

|      |       |       |       |       |                        |                                                                                                                               |       |    |
|------|-------|-------|-------|-------|------------------------|-------------------------------------------------------------------------------------------------------------------------------|-------|----|
| 1310 | 10.51 | 11.95 | 13.31 | 2.61  | sp Q6ZQ08 CNOT1_MOUSE  | CCR4-NOT transcription complex subunit 1 OS=Mus musculus OX=10090 GN=Cnot1 PE=1 SV=2                                          | MOUSE | 6  |
| 1311 | 10.49 | 10.78 | 10.04 | 4.70  | sp B1AZI6 THOC2_MOUSE  | THO complex subunit 2 OS=Mus musculus OX=10090 GN=Thoc2 PE=1 SV=1                                                             | MOUSE | 6  |
| 1312 | 10.48 | 15.56 | 13.88 | 4.52  | tr Q80TM2 Q80TM2_MOUSE | MKIAA1027 protein (Fragment) OS=Mus musculus OX=10090 GN=Tln1 PE=2 SV=4                                                       | MOUSE | 7  |
| 1313 | 10.43 | 10.46 | 43.63 | 33.98 | sp Q3UGR5 HDHD2_MOUSE  | Haloacid dehalogenase-like hydrolase domain-containing protein 2 OS=Mus musculus OX=10090 GN=Hdhd2 PE=1 SV=2                  | MOUSE | 6  |
| 1314 | 10.42 | 10.88 | 17.51 | 6.29  | sp Q9Z277 BAZ1B_MOUSE  | Tyrosine-protein kinase BAZ1B OS=Mus musculus OX=10090 GN=Baz1b PE=1 SV=2                                                     | MOUSE | 7  |
| 1315 | 10.42 | 10.63 | 14.77 | 5.14  | tr B2RQQ7 B2RQQ7_MOUSE | Non-specific serine/threonine protein kinase OS=Mus musculus OX=10090 GN=Cdc42bpb PE=2 SV=1                                   | MOUSE | 5  |
| 1316 | 10.42 | 10.53 | 22.99 | 16.90 | tr Q6P6I8 Q6P6I8_MOUSE | Signal-regulatory protein alpha OS=Mus musculus OX=10090 GN=Sirpa PE=1 SV=1                                                   | MOUSE | 6  |
| 1317 | 10.42 | 10.53 | 33.01 | 20.71 | sp Q9CYG7 TOM34_MOUSE  | Mitochondrial import receptor subunit TOM34 OS=Mus musculus OX=10090 GN=Tom34 PE=1 SV=1                                       | MOUSE | 5  |
| 1318 | 10.42 | 10.45 | 54.76 | 53.17 | tr Q91VM2 Q91VM2_MOUSE | Small nuclear ribonucleoprotein Sm D3 OS=Mus musculus OX=10090 GN=Snrpd3 PE=2 SV=1                                            | MOUSE | 5  |
| 1319 | 10.4  | 14.51 | 53.91 | 53.91 | tr B2RVP5 B2RVP5_MOUSE | Histone H2A OS=Mus musculus OX=10090 GN=H2az2 PE=2 SV=1                                                                       | MOUSE | 11 |
| 1320 | 10.39 | 10.49 | 44.62 | 31.54 | sp O70152 DPM1_MOUSE   | Dolichol-phosphate mannosyltransferase subunit 1 OS=Mus musculus OX=10090 GN=Dpm1 PE=1 SV=1                                   | MOUSE | 7  |
| 1321 | 10.38 | 10.57 | 45.42 | 29.58 | tr Q8C845 Q8C845_MOUSE | EF-hand domain-containing protein D2 OS=Mus musculus OX=10090 GN=Efh2 PE=1 SV=1                                               | MOUSE | 7  |
| 1322 | 10.37 | 10.41 | 34.76 | 18.45 | sp Q99JX4 EIF3M_MOUSE  | Eukaryotic translation initiation factor 3 subunit M OS=Mus musculus OX=10090 GN=Eif3m PE=1 SV=1                              | MOUSE | 5  |
| 1323 | 10.36 | 10.6  | 41.75 | 24.92 | sp Q8K274 KT3K_MOUSE   | Ketosamine-3-kinase OS=Mus musculus OX=10090 GN=Fn3krp PE=1 SV=2                                                              | MOUSE | 6  |
| 1324 | 10.35 | 10.81 | 9.92  | 2.94  | sp Q6P5D8 SMHD1_MOUSE  | Structural maintenance of chromosomes flexible hinge domain-containing protein 1 OS=Mus musculus OX=10090 GN=Smchd1 PE=1 SV=2 | MOUSE | 5  |
| 1325 | 10.35 | 10.49 | 40.96 | 26.51 | tr Q3UMJ4 Q3UMJ4_MOUSE | General transcription factor IIF subunit 2 OS=Mus musculus OX=10090 GN=Gtf2f2 PE=1 SV=1                                       | MOUSE | 6  |

|      |       |       |       |       |                                |                                                                                                    |       |   |
|------|-------|-------|-------|-------|--------------------------------|----------------------------------------------------------------------------------------------------|-------|---|
| 1326 | 10.33 | 10.49 | 12.27 | 6.05  | tr A0A3B2WCN9 A0A3B2WCN9_MOUSE | Tight junction protein ZO-2 OS=Mus musculus OX=10090 GN=Tjp2 PE=1 SV=1                             | MOUSE | 6 |
| 1327 | 10.31 | 10.4  | 41.49 | 41.49 | tr E9Q7G1 E9Q7G1_MOUSE         | Transmembrane p24-trafficking protein 7 OS=Mus musculus OX=10090 GN=Tmed7 PE=1 SV=1                | MOUSE | 7 |
| 1328 | 10.29 | 11.87 | 16.24 | 8.22  | tr D3Z061 D3Z061_MOUSE         | E1 ubiquitin-activating enzyme OS=Mus musculus OX=10090 GN=Uba6 PE=1 SV=1                          | MOUSE | 7 |
| 1329 | 10.27 | 11.42 | 43.38 | 25.87 | sp Q99KQ4 NAMPT_MOUSE          | Nicotinamide phosphoribosyltransferase OS=Mus musculus OX=10090 GN=Nampt PE=1 SV=1                 | MOUSE | 7 |
| 1330 | 10.25 | 10.55 | 20.29 | 7.99  | tr Q6ZQ47 Q6ZQ47_MOUSE         | MKIAA0784 protein (Fragment) OS=Mus musculus OX=10090 GN=Adnp PE=2 SV=1                            | MOUSE | 6 |
| 1331 | 10.24 | 10.41 | 21.41 | 11.52 | tr Q9DBS6 Q9DBS6_MOUSE         | Phosphodiesterase OS=Mus musculus OX=10090 GN=Pde1b PE=2 SV=1                                      | MOUSE | 5 |
| 1332 | 10.24 | 10.26 | 71.14 | 59.73 | sp Q9JKC6 CEND1_MOUSE          | Cell cycle exit and neuronal differentiation protein 1 OS=Mus musculus OX=10090 GN=Cend1 PE=1 SV=1 | MOUSE | 5 |
| 1333 | 10.22 | 10.34 | 12.17 | 8.76  | tr A0A571BE69 A0A571BE69_MOUSE | Neuronal-specific septin-3 OS=Mus musculus OX=10090 GN=Septin3 PE=1 SV=1                           | MOUSE | 9 |
| 1334 | 10.21 | 10.44 | 34.25 | 26.48 | tr A0A7N9VR94 A0A7N9VR94_MOUSE | AHNAK nucleoprotein 2 OS=Mus musculus OX=10090 GN=Ahnak2 PE=4 SV=1                                 | MOUSE | 5 |
| 1335 | 10.2  | 10.28 | 40.22 | 34.06 | sp Q9JHW2 NIT2_MOUSE           | Omega-amidase NIT2 OS=Mus musculus OX=10090 GN=Nit2 PE=1 SV=1                                      | MOUSE | 6 |
| 1336 | 10.18 | 10.27 | 21.61 | 19.11 | tr Q8BTW2 Q8BTW2_MOUSE         | Eukaryotic translation initiation factor 3 subunit F OS=Mus musculus OX=10090 GN=Eif3f PE=2 SV=1   | MOUSE | 6 |
| 1337 | 10.17 | 10.76 | 57.04 | 42.96 | sp Q9DC07 LNEBL_MOUSE          | LIM zinc-binding domain-containing Nebulette OS=Mus musculus OX=10090 GN=Nebi PE=1 SV=1            | MOUSE | 8 |
| 1338 | 10.16 | 10.27 | 39.69 | 34.54 | tr Q80V08 Q80V08_MOUSE         | 60S ribosomal protein L17 (Fragment) OS=Mus musculus OX=10090 GN=Rpl17 PE=2 SV=1                   | MOUSE | 7 |
| 1339 | 10.16 | 10.18 | 31.91 | 29.18 | sp Q8BGB7 ENOPH_MOUSE          | Enolase-phosphatase E1 OS=Mus musculus OX=10090 GN=Enoph1 PE=1 SV=1                                | MOUSE | 6 |
| 1340 | 10.15 | 10.22 | 39.54 | 39.54 | tr Q3TI40 Q3TI40_MOUSE         | Uncharacterized protein OS=Mus musculus OX=10090 GN=Mtx2 PE=2 SV=1                                 | MOUSE | 6 |
| 1341 | 10.15 | 10.16 | 27.39 | 17.52 | tr Q3TN35 Q3TN35_MOUSE         | Uncharacterized protein OS=Mus musculus OX=10090 GN=Sgta PE=2 SV=1                                 | MOUSE | 7 |

|      |       |       |       |       |                        |                                                                                                                       |       |    |
|------|-------|-------|-------|-------|------------------------|-----------------------------------------------------------------------------------------------------------------------|-------|----|
| 1342 | 10.14 | 10.27 | 36.13 | 36.13 | tr A3KMJ8 A3KMJ8_MOUSE | Vbp1 protein (Fragment) OS=Mus musculus OX=10090 GN=Vbp1 PE=2 SV=1                                                    | MOUSE | 6  |
| 1343 | 10.13 | 14.38 | 52.76 | 45.23 | sp Q9WVA4 TAGL2_MOUSE  | Transgelin-2 OS=Mus musculus OX=10090 GN=Tagln2 PE=1 SV=4                                                             | MOUSE | 7  |
| 1344 | 10.13 | 10.15 | 36.36 | 34.34 | sp Q9DCZ4 MIC26_MOUSE  | MICOS complex subunit Mic26 OS=Mus musculus OX=10090 GN=Apoo PE=1 SV=2                                                | MOUSE | 5  |
| 1345 | 10.11 | 29.88 | 58.51 | 58.24 | sp P61164 ACTZ_MOUSE   | Alpha-centractin OS=Mus musculus OX=10090 GN=Actr1a PE=1 SV=1                                                         | MOUSE | 18 |
| 1346 | 10.1  | 10.24 | 59.12 | 36.50 | sp P62965 RABP1_MOUSE  | Cellular retinoic acid-binding protein 1 OS=Mus musculus OX=10090 GN=Crabp1 PE=1 SV=2                                 | MOUSE | 6  |
| 1347 | 10.09 | 10.18 | 29.43 | 22.34 | sp P70697 DCUP_MOUSE   | Uroporphyrinogen decarboxylase OS=Mus musculus OX=10090 GN=Urod PE=1 SV=2                                             | MOUSE | 6  |
| 1348 | 10.09 | 10.1  | 37.66 | 29.87 | sp Q8BHC4 DCAKD_MOUSE  | Dephospho-CoA kinase domain-containing protein OS=Mus musculus OX=10090 GN=Dcakd PE=1 SV=1                            | MOUSE | 5  |
| 1349 | 10.08 | 10.28 | 20.06 | 16.17 | sp Q91VE0 S27A4_MOUSE  | Long-chain fatty acid transport protein 4 OS=Mus musculus OX=10090 GN=Slc27a4 PE=1 SV=1                               | MOUSE | 8  |
| 1350 | 10.07 | 10.19 | 50.53 | 46.84 | tr Q546K1 Q546K1_MOUSE | Cytoglobin OS=Mus musculus OX=10090 GN=Cygb PE=1 SV=1                                                                 | MOUSE | 6  |
| 1351 | 10.06 | 10.06 | 58.39 | 48.91 | sp Q9CR61 NDUB7_MOUSE  | NADH dehydrogenase [ubiquinone] 1 beta subcomplex subunit 7 OS=Mus musculus OX=10090 GN=Ndufb7 PE=1 SV=3              | MOUSE | 6  |
| 1352 | 10.05 | 10.13 | 18.44 | 15.37 | tr Q3UMC8 Q3UMC8_MOUSE | Uncharacterized protein OS=Mus musculus OX=10090 GN=Stam PE=2 SV=1                                                    | MOUSE | 7  |
| 1353 | 10.05 | 10.05 | 36.92 | 31.90 | tr Q8R5L1 Q8R5L1_MOUSE | Complement component 1 Q subcomponent-binding protein, mitochondrial OS=Mus musculus OX=10090 GN=C1qbp PE=1 SV=1      | MOUSE | 5  |
| 1354 | 10.04 | 10.04 | 4.30  | 3.20  | sp P70670 NACAM_MOUSE  | Nascent polypeptide-associated complex subunit alpha, muscle-specific form OS=Mus musculus OX=10090 GN=Naca PE=1 SV=2 | MOUSE | 6  |
| 1355 | 10.04 | 10.04 | 41.43 | 35.71 | tr B1AQF4 B1AQF4_MOUSE | Dual specificity protein phosphatase OS=Mus musculus OX=10090 GN=Dusp3 PE=1 SV=1                                      | MOUSE | 6  |
| 1356 | 10.02 | 10.23 | 47.04 | 27.61 | tr Q3TG37 Q3TG37_MOUSE | Na(+)/H(+) exchange regulatory cofactor NHE-RF OS=Mus musculus OX=10090 GN=Slc9a3r1 PE=2 SV=1                         | MOUSE | 6  |

|      |       |       |       |       |                                |                                                                                                                           |       |   |
|------|-------|-------|-------|-------|--------------------------------|---------------------------------------------------------------------------------------------------------------------------|-------|---|
| 1357 | 10.02 | 10.02 | 41.82 | 22.18 | sp Q9CZ04 CSN7A_MOUSE          | COP9 signalosome complex subunit 7a OS=Mus musculus<br>OX=10090 GN=Cops7a PE=1 SV=2                                       | MOUSE | 5 |
| 1358 | 10.01 | 10.26 | 41.36 | 33.33 | tr Q923F9 Q923F9_MOUSE         | NADH dehydrogenase [ubiquinone] iron-sulfur protein 4,<br>mitochondrial OS=Mus musculus OX=10090 GN=Ndufs4<br>PE=2 SV=1   | MOUSE | 6 |
| 1359 | 10.01 | 10.01 | 33.33 | 33.33 | tr Q53YX2 Q53YX2_MOUSE         | Thy-1 antigen OS=Mus musculus OX=10090 GN=Thy1<br>PE=2 SV=1                                                               | MOUSE | 5 |
| 1360 | 10    | 10.1  | 14.88 | 8.76  | tr A0A0R4J0S4 A0A0R4J0S4_MOUSE | Lethal(2) giant larvae protein homolog 1 OS=Mus musculus<br>OX=10090 GN=Llg1 PE=1 SV=1                                    | MOUSE | 6 |
| 1361 | 10    | 10.02 | 49.11 | 38.46 | sp Q9CZB0 C560_MOUSE           | Succinate dehydrogenase cytochrome b560 subunit,<br>mitochondrial OS=Mus musculus OX=10090 GN=Sdhc PE=1<br>SV=1           | MOUSE | 5 |
| 1362 | 10    | 10    | 36.84 | 36.18 | sp Q9CQ92 FIS1_MOUSE           | Mitochondrial fission 1 protein OS=Mus musculus<br>OX=10090 GN=Fis1 PE=1 SV=1                                             | MOUSE | 6 |
| 1363 | 10    | 10    | 32.84 | 32.84 | sp Q9JM62 REEP6_MOUSE          | Receptor expression-enhancing protein 6 OS=Mus musculus<br>OX=10090 GN=Reep6 PE=1 SV=1                                    | MOUSE | 5 |
| 1364 | 10    | 10    | 22.54 | 22.54 | sp P51491 OPSB_MOUSE           | Short-wave-sensitive opsin 1 OS=Mus musculus OX=10090<br>GN=Opn1sw PE=1 SV=1                                              | MOUSE | 6 |
| 1365 | 9.98  | 11.16 | 14.24 | 9.10  | tr C7G3P2 C7G3P2_MOUSE         | PRP4 pre-mRNA-processing factor 4 homolog (Fragment)<br>OS=Mus musculus OX=10090 GN=Prpf4b PE=2 SV=1                      | MOUSE | 8 |
| 1366 | 9.97  | 10.18 | 17.96 | 10.21 | tr A0A0G2JEP0 A0A0G2JEP0_MOUSE | Fragile X mental retardation syndrome-related protein 1<br>OS=Mus musculus OX=10090 GN=Fxr1 PE=1 SV=1                     | MOUSE | 5 |
| 1367 | 9.96  | 10.09 | 20.85 | 14.58 | tr F8SLQ5 F8SLQ5_MOUSE         | Peroxisomal biogenesis factor 5-like protein transcript<br>variant 11 OS=Mus musculus OX=10090 GN=Pex5l PE=2<br>SV=1      | MOUSE | 6 |
| 1368 | 9.95  | 10.13 | 50.00 | 23.87 | sp O35593 PSDE_MOUSE           | 26S proteasome non-ATPase regulatory subunit 14 OS=Mus<br>musculus OX=10090 GN=Psm14 PE=1 SV=2                            | MOUSE | 5 |
| 1369 | 9.95  | 10.1  | 29.81 | 16.16 | sp Q8BHD8 PCMD2_MOUSE          | Protein-L-isoaspartate O-methyltransferase domain-<br>containing protein 2 OS=Mus musculus OX=10090<br>GN=Pcmd2 PE=2 SV=1 | MOUSE | 6 |
| 1370 | 9.92  | 10.34 | 25.94 | 14.27 | sp A2ALS5-3 RPGP1_MOUSE        | Isoform 3 of Rap1 GTPase-activating protein 1 OS=Mus<br>musculus OX=10090 GN=Rap1gap                                      | MOUSE | 6 |
| 1371 | 9.91  | 10.14 | 14.83 | 8.57  | sp Q3UVL4 VPS51_MOUSE          | Vacuolar protein sorting-associated protein 51 homolog<br>OS=Mus musculus OX=10090 GN=Vps51 PE=1 SV=2                     | MOUSE | 6 |

|      |      |       |       |       |                        |                                                                                                                      |       |   |
|------|------|-------|-------|-------|------------------------|----------------------------------------------------------------------------------------------------------------------|-------|---|
| 1372 | 9.89 | 10.03 | 57.04 | 56.30 | tr Q497I3 Q497I3_MOUSE | Fatty acid binding protein 5, epidermal OS=Mus musculus<br>OX=10090 GN=Fabp5 PE=1 SV=1                               | MOUSE | 5 |
| 1373 | 9.89 | 10    | 33.81 | 21.94 | tr Q3UYX6 Q3UYX6_MOUSE | RRM domain-containing protein OS=Mus musculus<br>OX=10090 GN=Srsf10 PE=2 SV=1                                        | MOUSE | 5 |
| 1374 | 9.89 | 9.92  | 23.05 | 23.05 | sp O88271 CFDP1_MOUSE  | Craniofacial development protein 1 OS=Mus musculus<br>OX=10090 GN=Cfdp1 PE=1 SV=1                                    | MOUSE | 5 |
| 1375 | 9.88 | 9.99  | 21.06 | 13.91 | tr G5E8R8 G5E8R8_MOUSE | UBX domain-containing protein 7 OS=Mus musculus<br>OX=10090 GN=Ubxn7 PE=1 SV=1                                       | MOUSE | 5 |
| 1376 | 9.88 | 9.95  | 24.30 | 18.72 | sp Q99KV1 DJB11_MOUSE  | DnaJ homolog subfamily B member 11 OS=Mus musculus<br>OX=10090 GN=Dnajb11 PE=1 SV=1                                  | MOUSE | 5 |
| 1377 | 9.86 | 9.94  | 55.15 | 55.15 | tr Q3UTI7 Q3UTI7_MOUSE | Peptidyl-prolyl cis-trans isomerase OS=Mus musculus<br>OX=10090 GN=Pin1 PE=2 SV=1                                    | MOUSE | 8 |
| 1378 | 9.85 | 9.92  | 52.59 | 52.59 | sp P52503 NDUS6_MOUSE  | NADH dehydrogenase [ubiquinone] iron-sulfur protein 6, mitochondrial OS=Mus musculus<br>OX=10090 GN=Ndufs6 PE=1 SV=2 | MOUSE | 6 |
| 1379 | 9.84 | 15.84 | 30.62 | 14.68 | tr Q3UP61 Q3UP61_MOUSE | Uncharacterized protein OS=Mus musculus OX=10090<br>GN=Dlg1 PE=2 SV=1                                                | MOUSE | 9 |
| 1380 | 9.84 | 9.91  | 18.65 | 11.37 | tr Q3UJX2 Q3UJX2_MOUSE | DUF1716 domain-containing protein OS=Mus musculus<br>OX=10090 GN=Ctnnb1 PE=2 SV=1                                    | MOUSE | 5 |
| 1381 | 9.84 | 9.9   | 44.37 | 39.44 | tr Q3UJ76 Q3UJ76_MOUSE | AP complex subunit sigma OS=Mus musculus OX=10090<br>GN=Ap2s1 PE=1 SV=1                                              | MOUSE | 5 |
| 1382 | 9.82 | 10.77 | 28.33 | 20.94 | tr Q3URM4 Q3URM4_MOUSE | Thioredoxin domain-containing protein OS=Mus musculus<br>OX=10090 GN=Erp44 PE=2 SV=1                                 | MOUSE | 6 |
| 1383 | 9.82 | 10.02 | 7.09  | 2.93  | tr S4R2J9 S4R2J9_MOUSE | Protein PRRC2C OS=Mus musculus OX=10090 GN=Prrc2c<br>PE=1 SV=1                                                       | MOUSE | 6 |
| 1384 | 9.82 | 9.97  | 18.28 | 10.04 | sp O35136 NCAM2_MOUSE  | Neural cell adhesion molecule 2 OS=Mus musculus<br>OX=10090 GN=Ncam2 PE=1 SV=1                                       | MOUSE | 5 |
| 1385 | 9.79 | 9.91  | 47.09 | 26.98 | tr Q8BU20 Q8BU20_MOUSE | Complex I-SGDH OS=Mus musculus OX=10090<br>GN=Ndufb5 PE=2 SV=1                                                       | MOUSE | 6 |
| 1386 | 9.78 | 11.11 | 24.71 | 17.09 | tr Q3UZJ4 Q3UZJ4_MOUSE | Serine/threonine-protein phosphatase 2A 56 kDa regulatory subunit OS=Mus musculus<br>OX=10090 GN=Ppp2r5e PE=1 SV=1   | MOUSE | 6 |

|      |      |       |       |       |                                |                                                                                                            |       |   |
|------|------|-------|-------|-------|--------------------------------|------------------------------------------------------------------------------------------------------------|-------|---|
| 1387 | 9.78 | 9.89  | 25.78 | 20.40 | sp Q9D880 TIM50_MOUSE          | Mitochondrial import inner membrane translocase subunit TIM50 OS=Mus musculus OX=10090 GN=Timm50 PE=1 SV=1 | MOUSE | 5 |
| 1388 | 9.76 | 10.08 | 25.94 | 21.46 | tr Q05CI8 Q05CI8_MOUSE         | Ccbl1 protein OS=Mus musculus OX=10090 GN=Kyat1 PE=1 SV=1                                                  | MOUSE | 7 |
| 1389 | 9.76 | 9.93  | 14.49 | 3.18  | tr Q3UH16 Q3UH16_MOUSE         | Uncharacterized protein OS=Mus musculus OX=10090 GN=Kif1a PE=2 SV=1                                        | MOUSE | 5 |
| 1390 | 9.74 | 10.01 | 37.72 | 28.74 | sp P61965 WDR5_MOUSE           | WD repeat-containing protein 5 OS=Mus musculus OX=10090 GN=Wdr5 PE=1 SV=1                                  | MOUSE | 6 |
| 1391 | 9.7  | 10.11 | 40.25 | 28.30 | sp O55091 IMPCT_MOUSE          | Protein IMPACT OS=Mus musculus OX=10090 GN=Impact PE=1 SV=2                                                | MOUSE | 6 |
| 1392 | 9.7  | 9.88  | 35.48 | 34.19 | sp Q9D6U8 F162A_MOUSE          | Protein FAM162A OS=Mus musculus OX=10090 GN=Fam162a PE=1 SV=1                                              | MOUSE | 6 |
| 1393 | 9.7  | 9.85  | 33.21 | 31.43 | tr Q571F3 Q571F3_MOUSE         | MFLJ00061 protein (Fragment) OS=Mus musculus OX=10090 GN=Necap1 PE=2 SV=1                                  | MOUSE | 6 |
| 1394 | 9.68 | 9.91  | 22.96 | 17.92 | sp Q8BGR9 UBCP1_MOUSE          | Ubiquitin-like domain-containing CTD phosphatase 1 OS=Mus musculus OX=10090 GN=Ublcp1 PE=1 SV=1            | MOUSE | 6 |
| 1395 | 9.68 | 9.86  | 23.47 | 14.24 | sp Q8BRF7 SCFD1_MOUSE          | Sec1 family domain-containing protein 1 OS=Mus musculus OX=10090 GN=Scfd1 PE=1 SV=1                        | MOUSE | 6 |
| 1396 | 9.68 | 9.72  | 45.35 | 40.12 | sp Q8VED9 LEGL_MOUSE           | Galectin-related protein OS=Mus musculus OX=10090 GN=Lgalsl PE=1 SV=1                                      | MOUSE | 5 |
| 1397 | 9.67 | 9.85  | 51.60 | 31.05 | tr Q544R8 Q544R8_MOUSE         | Trafficking protein particle complex subunit OS=Mus musculus OX=10090 GN=Trappc4 PE=1 SV=1                 | MOUSE | 6 |
| 1398 | 9.66 | 9.91  | 48.88 | 32.74 | tr Q3U489 Q3U489_MOUSE         | Adenylate kinase 4, mitochondrial OS=Mus musculus OX=10090 GN=Ak4 PE=1 SV=1                                | MOUSE | 6 |
| 1399 | 9.63 | 9.96  | 42.86 | 30.31 | sp Q3TDK6 ROGDI_MOUSE          | Protein rogdi homolog OS=Mus musculus OX=10090 GN=Rogdi PE=1 SV=2                                          | MOUSE | 6 |
| 1400 | 9.62 | 9.74  | 11.89 | 7.03  | sp Q8K400 STXB5_MOUSE          | Syntaxin-binding protein 5 OS=Mus musculus OX=10090 GN=Stxbp5 PE=1 SV=3                                    | MOUSE | 5 |
| 1401 | 9.6  | 13.25 | 49.24 | 49.24 | tr Q9CU14 Q9CU14_MOUSE         | PX domain-containing protein (Fragment) OS=Mus musculus OX=10090 GN=Snx3 PE=2 SV=1                         | MOUSE | 8 |
| 1402 | 9.58 | 14.05 | 14.73 | 11.33 | tr A0A5F8MP96 A0A5F8MP96_MOUSE | Septin-4 OS=Mus musculus OX=10090 GN=Septin4 PE=1 SV=1                                                     | MOUSE | 9 |

|      |      |       |       |       |                        |                                                                                                                   |       |    |
|------|------|-------|-------|-------|------------------------|-------------------------------------------------------------------------------------------------------------------|-------|----|
| 1403 | 9.52 | 9.78  | 43.62 | 31.38 | sp Q9EQ80 NIF3L_MOUSE  | NIF3-like protein 1 OS=Mus musculus OX=10090 GN=Nif3l1 PE=1 SV=4                                                  | MOUSE | 6  |
| 1404 | 9.52 | 9.57  | 57.75 | 56.34 | tr Q5EBI8 Q5EBI8_MOUSE | ATP synthase subunit e, mitochondrial OS=Mus musculus OX=10090 GN=Atp5k PE=2 SV=1                                 | MOUSE | 5  |
| 1405 | 9.5  | 9.77  | 27.35 | 16.57 | tr Q3UH04 Q3UH04_MOUSE | Protein kinase domain-containing protein OS=Mus musculus OX=10090 GN=Camk1d PE=2 SV=1                             | MOUSE | 6  |
| 1406 | 9.5  | 9.66  | 51.45 | 41.49 | tr Q542F1 Q542F1_MOUSE | Chloride intracellular channel protein OS=Mus musculus OX=10090 GN=Clic1 PE=1 SV=1                                | MOUSE | 6  |
| 1407 | 9.5  | 9.56  | 45.65 | 39.86 | tr Q9D181 Q9D181_MOUSE | U6 snRNA-associated Sm-like protein LSm4 OS=Mus musculus OX=10090 GN=Lsm4 PE=2 SV=1                               | MOUSE | 5  |
| 1408 | 9.49 | 9.74  | 18.46 | 8.13  | tr Q3TUQ5 Q3TUQ5_MOUSE | Pinin OS=Mus musculus OX=10090 GN=Pnn PE=1 SV=1                                                                   | MOUSE | 5  |
| 1409 | 9.49 | 9.6   | 35.71 | 29.46 | sp Q9DC70 NDUS7_MOUSE  | NADH dehydrogenase [ubiquinone] iron-sulfur protein 7, mitochondrial OS=Mus musculus OX=10090 GN=Ndufs7 PE=1 SV=1 | MOUSE | 6  |
| 1410 | 9.49 | 9.53  | 19.21 | 16.59 | tr Q80V84 Q80V84_MOUSE | HtrA serine peptidase 2 OS=Mus musculus OX=10090 GN=Htra2 PE=2 SV=1                                               | MOUSE | 6  |
| 1411 | 9.48 | 9.65  | 22.59 | 19.25 | tr Q921L6 Q921L6_MOUSE | Ctnn protein OS=Mus musculus OX=10090 GN=Ctnn PE=1 SV=1                                                           | MOUSE | 7  |
| 1412 | 9.48 | 9.61  | 34.62 | 28.40 | tr Q3UTV3 Q3UTV3_MOUSE | Uncharacterized protein (Fragment) OS=Mus musculus OX=10090 GN=Gdap1 PE=2 SV=1                                    | MOUSE | 6  |
| 1413 | 9.47 | 15.82 | 51.00 | 43.00 | tr Q4FJL0 Q4FJL0_MOUSE | Rab10 OS=Mus musculus OX=10090 GN=Rab10 PE=1 SV=1                                                                 | MOUSE | 8  |
| 1414 | 9.47 | 9.57  | 22.51 | 22.51 | sp Q99J09 MEP50_MOUSE  | Methylosome protein 50 OS=Mus musculus OX=10090 GN=Wdr77 PE=1 SV=1                                                | MOUSE | 6  |
| 1415 | 9.47 | 9.52  | 30.04 | 26.18 | sp Q9D6Y7 MSRA_MOUSE   | Mitochondrial peptide methionine sulfoxide reductase OS=Mus musculus OX=10090 GN=Msra PE=1 SV=1                   | MOUSE | 5  |
| 1416 | 9.44 | 9.58  | 61.86 | 58.47 | tr Q54A87 Q54A87_MOUSE | V-type proton ATPase subunit G OS=Mus musculus OX=10090 GN=Atp6v1g2 PE=1 SV=1                                     | MOUSE | 6  |
| 1417 | 9.43 | 9.67  | 31.26 | 26.77 | sp Q8CBY8 DCTN4_MOUSE  | Dynactin subunit 4 OS=Mus musculus OX=10090 GN=Dctn4 PE=1 SV=1                                                    | MOUSE | 10 |
| 1418 | 9.43 | 9.63  | 40.98 | 26.50 | sp P97355 SPSY_MOUSE   | Spermine synthase OS=Mus musculus OX=10090 GN=Sms PE=1 SV=1                                                       | MOUSE | 6  |



|      |      |       |       |       |                                |                                                                                                               |       |    |
|------|------|-------|-------|-------|--------------------------------|---------------------------------------------------------------------------------------------------------------|-------|----|
| 1419 | 9.43 | 9.5   | 48.08 | 47.12 | tr Q4FZH7 Q4FZH7_MOUSE         | Enhancer of rudimentary homolog OS=Mus musculus<br>OX=10090 GN=Erh PE=1 SV=1                                  | MOUSE | 5  |
| 1420 | 9.42 | 29.83 | 55.04 | 43.33 | tr Q3T9L0 Q3T9L0_MOUSE         | RNA helicase OS=Mus musculus OX=10090 GN=Ddx39a<br>PE=2 SV=1                                                  | MOUSE | 17 |
| 1421 | 9.42 | 9.68  | 17.43 | 13.03 | tr Q69ZY2 Q69ZY2_MOUSE         | MKIAA0830 protein (Fragment) OS=Mus musculus<br>OX=10090 GN=Endod1 PE=2 SV=1                                  | MOUSE | 6  |
| 1422 | 9.41 | 9.68  | 35.50 | 18.49 | tr Q68FH8 Q68FH8_MOUSE         | Smarcd1 protein OS=Mus musculus OX=10090<br>GN=Smarcd1 PE=2 SV=2                                              | MOUSE | 7  |
| 1423 | 9.41 | 9.45  | 31.82 | 28.79 | sp P99026 PSB4_MOUSE           | Proteasome subunit beta type-4 OS=Mus musculus<br>OX=10090 GN=Psm4 PE=1 SV=1                                  | MOUSE | 6  |
| 1424 | 9.38 | 9.52  | 65.83 | 38.33 | sp Q9CQ54 NDUC2_MOUSE          | NADH dehydrogenase [ubiquinone] 1 subunit C2 OS=Mus<br>musculus OX=10090 GN=Ndufc2 PE=1 SV=1                  | MOUSE | 5  |
| 1425 | 9.36 | 9.48  | 7.73  | 4.42  | tr Q8C2N9 Q8C2N9_MOUSE         | DNA mismatch repair protein OS=Mus musculus<br>OX=10090 GN=Msh6 PE=2 SV=1                                     | MOUSE | 5  |
| 1426 | 9.34 | 9.51  | 19.27 | 11.71 | sp P27612 PLAP_MOUSE           | Phospholipase A-2-activating protein OS=Mus musculus<br>OX=10090 GN=Plaa PE=1 SV=4                            | MOUSE | 7  |
| 1427 | 9.34 | 9.47  | 26.32 | 20.05 | sp O89112 LANC1_MOUSE          | Glutathione S-transferase LANCL1 OS=Mus musculus<br>OX=10090 GN=Land1 PE=1 SV=1                               | MOUSE | 7  |
| 1428 | 9.34 | 9.41  | 46.82 | 28.64 | tr A0A0J9YV85 A0A0J9YV85_MOUSE | Ras-related protein Rab-28 OS=Mus musculus OX=10090<br>GN=Rab28 PE=1 SV=1                                     | MOUSE | 5  |
| 1429 | 9.33 | 9.97  | 6.14  | 1.47  | sp A2AN08 UBR4_MOUSE           | E3 ubiquitin-protein ligase UBR4 OS=Mus musculus<br>OX=10090 GN=Ubr4 PE=1 SV=1                                | MOUSE | 5  |
| 1430 | 9.33 | 9.41  | 22.99 | 11.88 | tr Q3UHZ7 Q3UHZ7_MOUSE         | UDP-N-acetylhexosamine pyrophosphorylase OS=Mus<br>musculus OX=10090 GN=Uap1 PE=1 SV=1                        | MOUSE | 7  |
| 1431 | 9.32 | 9.79  | 33.05 | 18.46 | tr Q3USR8 Q3USR8_MOUSE         | Uncharacterized protein (Fragment) OS=Mus musculus<br>OX=10090 GN=Ctcf PE=2 SV=1                              | MOUSE | 5  |
| 1432 | 9.3  | 9.51  | 8.06  | 5.94  | tr K3W4L0 K3W4L0_MOUSE         | Unconventional myosin-XVIIIa OS=Mus musculus<br>OX=10090 GN=Myo18a PE=1 SV=1                                  | MOUSE | 7  |
| 1433 | 9.28 | 13.06 | 48.56 | 44.03 | tr Q8BH80 Q8BH80_MOUSE         | Vesicle-associated membrane protein, associated protein B<br>and C OS=Mus musculus OX=10090 GN=Vapb PE=1 SV=1 | MOUSE | 10 |
| 1434 | 9.26 | 9.38  | 32.26 | 25.81 | tr Q3UVR2 Q3UVR2_MOUSE         | Uncharacterized protein OS=Mus musculus OX=10090<br>GN=Cntfr PE=2 SV=1                                        | MOUSE | 6  |
| 1435 | 9.26 | 9.37  | 38.77 | 29.52 | sp Q9WTP7 KAD3_MOUSE           | GTP:AMP phosphotransferase AK3, mitochondrial OS=Mus<br>musculus OX=10090 GN=Ak3 PE=1 SV=3                    | MOUSE | 6  |

|      |      |       |       |       |                                |                                                                                                                                        |       |    |
|------|------|-------|-------|-------|--------------------------------|----------------------------------------------------------------------------------------------------------------------------------------|-------|----|
| 1436 | 9.26 | 9.34  | 43.29 | 41.13 | sp Q9WTL7 LYPA2_MOUSE          | Acyl-protein thioesterase 2 OS=Mus musculus OX=10090 GN=Lypla2 PE=1 SV=1                                                               | MOUSE | 6  |
| 1437 | 9.25 | 9.35  | 45.24 | 45.24 | tr Q564F6 Q564F6_MOUSE         | Programmed cell death 5 OS=Mus musculus OX=10090 GN=Pdcd5 PE=1 SV=1                                                                    | MOUSE | 5  |
| 1438 | 9.22 | 9.46  | 28.51 | 19.22 | sp P21956 MFGM_MOUSE           | Lactadherin OS=Mus musculus OX=10090 GN=Mfge8 PE=1 SV=3                                                                                | MOUSE | 6  |
| 1439 | 9.22 | 9.37  | 36.88 | 32.50 | tr Q3TJG6 Q3TJG6_MOUSE         | CS domain-containing protein OS=Mus musculus OX=10090 GN=Ptges3 PE=2 SV=1                                                              | MOUSE | 5  |
| 1440 | 9.21 | 9.41  | 28.57 | 18.94 | tr Q7TPW6 Q7TPW6_MOUSE         | Solute carrier family 25 (Mitochondrial carnitine/acylcarnitine translocase), member 20 OS=Mus musculus OX=10090 GN=Slc25a20 PE=2 SV=1 | MOUSE | 6  |
| 1441 | 9.2  | 9.33  | 30.15 | 27.48 | sp P57759 ERP29_MOUSE          | Endoplasmic reticulum resident protein 29 OS=Mus musculus OX=10090 GN=Erp29 PE=1 SV=2                                                  | MOUSE | 6  |
| 1442 | 9.19 | 9.36  | 29.77 | 29.10 | tr Q543C9 Q543C9_MOUSE         | Homeobox domain-containing protein OS=Mus musculus OX=10090 GN=Crx PE=2 SV=1                                                           | MOUSE | 8  |
| 1443 | 9.18 | 14.26 | 44.06 | 44.06 | tr Q5RKN9 Q5RKN9_MOUSE         | F-actin-capping protein subunit alpha OS=Mus musculus OX=10090 GN=Capza1 PE=1 SV=1                                                     | MOUSE | 8  |
| 1444 | 9.18 | 9.35  | 19.28 | 12.85 | sp P36916 GNL1_MOUSE           | Guanine nucleotide-binding protein-like 1 OS=Mus musculus OX=10090 GN=Gnl1 PE=1 SV=4                                                   | MOUSE | 6  |
| 1445 | 9.1  | 20.98 | 19.13 | 10.27 | sp Q91W97 HKDC1_MOUSE          | Hexokinase HKDC1 OS=Mus musculus OX=10090 GN=Hkdc1 PE=2 SV=1                                                                           | MOUSE | 10 |
| 1446 | 9.1  | 9.22  | 23.68 | 17.24 | tr A0A0J9YVG0 A0A0J9YVG0_MOUSE | Protein phosphatase 1G OS=Mus musculus OX=10090 GN=Ppm1g PE=1 SV=1                                                                     | MOUSE | 5  |
| 1447 | 9.1  | 9.18  | 15.52 | 10.52 | tr Q32P04 Q32P04_MOUSE         | Keratin 5 OS=Mus musculus OX=10090 GN=Krt5 PE=1 SV=2                                                                                   | MOUSE | 6  |
| 1448 | 9.09 | 18.36 | 68.67 | 55.36 | sp Q8JZS0 LIN7A_MOUSE          | Protein lin-7 homolog A OS=Mus musculus OX=10090 GN=Lin7a PE=1 SV=2                                                                    | MOUSE | 11 |
| 1449 | 9.09 | 10.46 | 79.67 | 69.11 | tr Q5GQ64 Q5GQ64_MOUSE         | Gamma-synuclein (Fragment) OS=Mus musculus OX=10090 GN=Sncg PE=1 SV=1                                                                  | MOUSE | 6  |
| 1450 | 9.08 | 9.32  | 26.04 | 13.60 | tr E9PV22 E9PV22_MOUSE         | Leucine-rich repeat-containing protein 47 OS=Mus musculus OX=10090 GN=Lrrc47 PE=1 SV=1                                                 | MOUSE | 6  |
| 1451 | 9.06 | 9.19  | 26.47 | 16.04 | tr Q3V199 Q3V199_MOUSE         | W2 domain-containing protein (Fragment) OS=Mus musculus OX=10090 GN=Bzw2 PE=2 SV=1                                                     | MOUSE | 6  |

|      |      |       |       |       |                                |                                                                                                |       |   |
|------|------|-------|-------|-------|--------------------------------|------------------------------------------------------------------------------------------------|-------|---|
| 1452 | 9.05 | 9.08  | 55.56 | 45.83 | tr D3Z645 D3Z645_MOUSE         | Vacuolar protein sorting-associated protein 29 OS=Mus musculus OX=10090 GN=Vps29 PE=1 SV=1     | MOUSE | 5 |
| 1453 | 9.04 | 11.38 | 30.36 | 23.93 | tr A0A0N4SVC2 A0A0N4SVC2_MOUSE | Transformer-2 protein homolog alpha OS=Mus musculus OX=10090 GN=Tra2a PE=1 SV=1                | MOUSE | 6 |
| 1454 | 9.02 | 9.07  | 28.71 | 25.25 | sp P43081 GUC1A_MOUSE          | Guanylyl cyclase-activating protein 1 OS=Mus musculus OX=10090 GN=Guca1a PE=1 SV=3             | MOUSE | 5 |
| 1455 | 9.01 | 9.24  | 15.57 | 9.86  | tr Q3U3A8 Q3U3A8_MOUSE         | Calcium-activated neutral proteinase 2 OS=Mus musculus OX=10090 GN=Capn2 PE=2 SV=1             | MOUSE | 5 |
| 1456 | 9    | 10.17 | 28.39 | 22.25 | tr Q3UCW0 Q3UCW0_MOUSE         | Uncharacterized protein OS=Mus musculus OX=10090 GN=Tsg101 PE=1 SV=1                           | MOUSE | 6 |
| 1457 | 8.98 | 9.13  | 38.02 | 23.64 | sp Q99L04 DHRS1_MOUSE          | Dehydrogenase/reductase SDR family member 1 OS=Mus musculus OX=10090 GN=Dhrs1 PE=1 SV=1        | MOUSE | 6 |
| 1458 | 8.98 | 9.02  | 70.59 | 70.59 | sp Q9CQX8 RT36_MOUSE           | 28S ribosomal protein S36, mitochondrial OS=Mus musculus OX=10090 GN=Mrps36 PE=1 SV=1          | MOUSE | 5 |
| 1459 | 8.96 | 9.21  | 67.72 | 42.41 | sp Q9D289 TPC6B_MOUSE          | Trafficking protein particle complex subunit 6B OS=Mus musculus OX=10090 GN=Trappc6b PE=1 SV=1 | MOUSE | 6 |
| 1460 | 8.95 | 11.93 | 12.04 | 6.78  | tr J9RV59 J9RV59_MOUSE         | Anion exchange protein OS=Mus musculus OX=10090 GN=Slc4a7 PE=1 SV=1                            | MOUSE | 6 |
| 1461 | 8.95 | 9.1   | 25.67 | 12.17 | tr Q3UJ53 Q3UJ53_MOUSE         | Amine oxidase OS=Mus musculus OX=10090 GN=Maoa PE=2 SV=1                                       | MOUSE | 5 |
| 1462 | 8.94 | 9.04  | 23.75 | 21.46 | tr Q91ZH2 Q91ZH2_MOUSE         | Proliferating cell nuclear antigen OS=Mus musculus OX=10090 GN=Pcna PE=2 SV=1                  | MOUSE | 5 |
| 1463 | 8.92 | 9.59  | 24.67 | 17.67 | tr Q3V0T8 Q3V0T8_MOUSE         | Uncharacterized protein OS=Mus musculus OX=10090 GN=Ggps1 PE=1 SV=1                            | MOUSE | 5 |
| 1464 | 8.92 | 8.98  | 41.44 | 41.44 | tr Q3U6E4 Q3U6E4_MOUSE         | Uncharacterized protein OS=Mus musculus OX=10090 GN=Ptma PE=2 SV=1                             | MOUSE | 6 |
| 1465 | 8.91 | 9.06  | 30.50 | 12.87 | tr Q3UYS0 Q3UYS0_MOUSE         | Uncharacterized protein OS=Mus musculus OX=10090 GN=Pccb PE=2 SV=1                             | MOUSE | 5 |
| 1466 | 8.91 | 8.98  | 43.28 | 26.89 | sp Q60692 PSB6_MOUSE           | Proteasome subunit beta type-6 OS=Mus musculus OX=10090 GN=Psmb6 PE=1 SV=3                     | MOUSE | 5 |
| 1467 | 8.9  | 9.08  | 22.48 | 9.53  | tr Q3UYN2 Q3UYN2_MOUSE         | Copine-6 OS=Mus musculus OX=10090 GN=Cpne6 PE=1 SV=1                                           | MOUSE | 6 |
| 1468 | 8.88 | 9.87  | 17.19 | 9.60  | tr Q3UDL9 Q3UDL9_MOUSE         | Uncharacterized protein (Fragment) OS=Mus musculus OX=10090 GN=Bclaf1 PE=2 SV=1                | MOUSE | 6 |

|      |      |       |       |       |                        |                                                                                                                                             |       |    |
|------|------|-------|-------|-------|------------------------|---------------------------------------------------------------------------------------------------------------------------------------------|-------|----|
| 1469 | 8.88 | 9.05  | 13.47 | 7.89  | tr Q8BWY6 Q8BWY6_MOUSE | Alpha-mannosidase OS=Mus musculus OX=10090 GN=Man2c1 PE=2 SV=1                                                                              | MOUSE | 5  |
| 1470 | 8.88 | 8.98  | 22.80 | 17.03 | sp Q9QXB9 DRG2_MOUSE   | Developmentally-regulated GTP-binding protein 2 OS=Mus musculus OX=10090 GN=Drg2 PE=1 SV=1                                                  | MOUSE | 5  |
| 1471 | 8.87 | 8.98  | 18.18 | 9.57  | tr Q5RL55 Q5RL55_MOUSE | ATP-binding cassette, sub-family F (GCN20), member 1 OS=Mus musculus OX=10090 GN=Abcf1 PE=2 SV=1                                            | MOUSE | 5  |
| 1472 | 8.86 | 9.14  | 31.39 | 13.38 | sp O54941 SMCE1_MOUSE  | SWI/SNF-related matrix-associated actin-dependent regulator of chromatin subfamily E member 1 OS=Mus musculus OX=10090 GN=Smarce1 PE=1 SV=1 | MOUSE | 5  |
| 1473 | 8.86 | 8.91  | 18.29 | 10.66 | sp Q8BI72 CARF_MOUSE   | CDKN2A-interacting protein OS=Mus musculus OX=10090 GN=Cdkn2aip PE=1 SV=1                                                                   | MOUSE | 5  |
| 1474 | 8.85 | 9.64  | 21.01 | 11.83 | sp Q922Q1 MARC2_MOUSE  | Mitochondrial amidoxime reducing component 2 OS=Mus musculus OX=10090 GN=Mtarc2 PE=1 SV=1                                                   | MOUSE | 5  |
| 1475 | 8.84 | 9.04  | 11.90 | 4.94  | sp Q8VDC1 FYCO1_MOUSE  | FYVE and coiled-coil domain-containing protein 1 OS=Mus musculus OX=10090 GN=Fyco1 PE=1 SV=1                                                | MOUSE | 5  |
| 1476 | 8.82 | 8.86  | 7.52  | 5.24  | tr H3BL37 H3BL37_MOUSE | Treacle protein OS=Mus musculus OX=10090 GN=Tcof1 PE=1 SV=1                                                                                 | MOUSE | 5  |
| 1477 | 8.81 | 9.01  | 12.62 | 4.21  | tr B9EKP5 B9EKP5_MOUSE | Filamin, alpha OS=Mus musculus OX=10090 GN=Flna PE=2 SV=1                                                                                   | MOUSE | 6  |
| 1478 | 8.78 | 16.76 | 36.10 | 31.33 | tr Q58E49 Q58E49_MOUSE | Histone deacetylase OS=Mus musculus OX=10090 GN=Hdac1 PE=2 SV=1                                                                             | MOUSE | 10 |
| 1479 | 8.76 | 8.89  | 20.72 | 7.57  | tr Q8C7S2 Q8C7S2_MOUSE | LIM zinc-binding domain-containing protein OS=Mus musculus OX=10090 GN=Lima1 PE=2 SV=1                                                      | MOUSE | 4  |
| 1480 | 8.75 | 8.88  | 41.01 | 26.27 | tr Q3U5I5 Q3U5I5_MOUSE | Uncharacterized protein OS=Mus musculus OX=10090 GN=Grb2 PE=2 SV=1                                                                          | MOUSE | 6  |
| 1481 | 8.75 | 8.79  | 20.51 | 17.95 | tr B2RTE3 B2RTE3_MOUSE | Pre-mRNA-splicing factor 38A OS=Mus musculus OX=10090 GN=Prpf38a PE=2 SV=1                                                                  | MOUSE | 5  |
| 1482 | 8.74 | 8.78  | 52.98 | 46.36 | tr Q4VBC9 Q4VBC9_MOUSE | Complex I-ESSS (Fragment) OS=Mus musculus OX=10090 GN=Ndufb11 PE=2 SV=1                                                                     | MOUSE | 5  |
| 1483 | 8.71 | 15.13 | 36.39 | 23.30 | sp P49443 PPM1A_MOUSE  | Protein phosphatase 1A OS=Mus musculus OX=10090 GN=Ppm1a PE=1 SV=1                                                                          | MOUSE | 7  |
| 1484 | 8.71 | 8.84  | 45.79 | 23.23 | tr Q3USR5 Q3USR5_MOUSE | Uncharacterized protein OS=Mus musculus OX=10090 GN=Fbxo2 PE=1 SV=1                                                                         | MOUSE | 5  |

|      |      |       |       |       |                        |                                                                                                         |       |    |
|------|------|-------|-------|-------|------------------------|---------------------------------------------------------------------------------------------------------|-------|----|
| 1485 | 8.71 | 8.82  | 50.20 | 29.72 | tr Q5HZK3 Q5HZK3_MOUSE | Proteasome (Prosome, macropain) 28 subunit, alpha OS=Mus musculus OX=10090 GN=Psme1 PE=1 SV=1           | MOUSE | 5  |
| 1486 | 8.71 | 8.77  | 40.00 | 20.00 | tr Q3UW40 Q3UW40_MOUSE | TRASH domain-containing protein OS=Mus musculus OX=10090 GN=Rpl24 PE=2 SV=1                             | MOUSE | 5  |
| 1487 | 8.71 | 8.77  | 34.18 | 22.45 | tr Q5I0T8 Q5I0T8_MOUSE | Ribosomal protein L19 OS=Mus musculus OX=10090 GN=Rpl19 PE=1 SV=1                                       | MOUSE | 6  |
| 1488 | 8.7  | 8.83  | 18.09 | 7.36  | sp Q9DBR1 XRN2_MOUSE   | 5'-3' exoribonuclease 2 OS=Mus musculus OX=10090 GN=Xrn2 PE=1 SV=1                                      | MOUSE | 5  |
| 1489 | 8.7  | 8.75  | 25.90 | 21.64 | sp Q99M28 RNPS1_MOUSE  | RNA-binding protein with serine-rich domain 1 OS=Mus musculus OX=10090 GN=Rnps1 PE=1 SV=1               | MOUSE | 6  |
| 1490 | 8.69 | 8.73  | 76.84 | 67.37 | tr Q3U9X2 Q3U9X2_MOUSE | U6 snRNA-associated Sm-like protein LSm2 OS=Mus musculus OX=10090 GN=Lsm2 PE=1 SV=1                     | MOUSE | 5  |
| 1491 | 8.68 | 10.92 | 42.59 | 22.22 | tr Q9D8S5 Q9D8S5_MOUSE | Serine/arginine-rich-splicing factor 5 OS=Mus musculus OX=10090 GN=Srsf5 PE=1 SV=1                      | MOUSE | 6  |
| 1492 | 8.68 | 8.9   | 42.72 | 26.93 | tr Q3ULN6 Q3ULN6_MOUSE | Sacchrp_dh_NADP domain-containing protein OS=Mus musculus OX=10090 GN=Sccpdh PE=2 SV=1                  | MOUSE | 6  |
| 1493 | 8.66 | 27.18 | 29.91 | 20.69 | tr Q3U111 Q3U111_MOUSE | FERM domain-containing protein (Fragment) OS=Mus musculus OX=10090 GN=Rdx PE=2 SV=1                     | MOUSE | 14 |
| 1494 | 8.64 | 9.02  | 5.71  | 1.79  | sp P11531 DMD_MOUSE    | Dystrophin OS=Mus musculus OX=10090 GN=Dmd PE=1 SV=3                                                    | MOUSE | 6  |
| 1495 | 8.64 | 8.74  | 34.03 | 34.03 | sp Q8BMJ3 IF1AX_MOUSE  | Eukaryotic translation initiation factor 1A, X-chromosomal OS=Mus musculus OX=10090 GN=Eif1ax PE=2 SV=3 | MOUSE | 5  |
| 1496 | 8.64 | 8.72  | 14.99 | 11.53 | tr Q9MD82 Q9MD82_MOUSE | NADH-ubiquinone oxidoreductase chain 5 OS=Mus musculus OX=10090 GN=mt-Nd5 PE=1 SV=1                     | MOUSE | 5  |
| 1497 | 8.62 | 8.83  | 57.81 | 40.63 | sp Q9D0T1 NH2L1_MOUSE  | NHP2-like protein 1 OS=Mus musculus OX=10090 GN=Snu13 PE=1 SV=4                                         | MOUSE | 6  |
| 1498 | 8.59 | 8.62  | 18.81 | 18.81 | sp Q9D0J8 PTMS_MOUSE   | Parathymosin OS=Mus musculus OX=10090 GN=Ptms PE=1 SV=3                                                 | MOUSE | 5  |
| 1499 | 8.57 | 8.74  | 44.97 | 20.12 | tr Q3TL79 Q3TL79_MOUSE | Aha1_N domain-containing protein OS=Mus musculus OX=10090 GN=Ahsa1 PE=2 SV=1                            | MOUSE | 5  |
| 1500 | 8.57 | 8.6   | 33.33 | 22.62 | tr Q9D3C4 Q9D3C4_MOUSE | Actin-related protein 2/3 complex subunit 4 OS=Mus musculus OX=10090 GN=Arpc4 PE=2 SV=1                 | MOUSE | 5  |
| 1501 | 8.55 | 8.75  | 27.62 | 22.14 | tr Q3U8V1 Q3U8V1_MOUSE | RRM domain-containing protein OS=Mus musculus OX=10090 GN=Poldip3 PE=2 SV=1                             | MOUSE | 6  |

|      |      |       |       |       |                                |                                                                                                       |       |    |
|------|------|-------|-------|-------|--------------------------------|-------------------------------------------------------------------------------------------------------|-------|----|
| 1502 | 8.53 | 8.65  | 37.35 | 33.13 | tr Q3U0J1 Q3U0J1_MOUSE         | Peptidyl-prolyl cis-trans isomerase OS=Mus musculus<br>OX=10090 GN=Ppil1 PE=2 SV=1                    | MOUSE | 6  |
| 1503 | 8.52 | 8.61  | 41.90 | 31.90 | tr E9QN99 E9QN99_MOUSE         | Protein ABHD14B OS=Mus musculus OX=10090<br>GN=Abhd14b PE=1 SV=1                                      | MOUSE | 6  |
| 1504 | 8.51 | 8.64  | 51.04 | 38.54 | sp P18608 HMGN1_MOUSE          | Non-histone chromosomal protein HMG-14 OS=Mus<br>musculus OX=10090 GN=Hmgn1 PE=1 SV=2                 | MOUSE | 13 |
| 1505 | 8.5  | 8.66  | 52.86 | 50.00 | tr Q52KP0 Q52KP0_MOUSE         | 60S ribosomal protein L38 OS=Mus musculus OX=10090<br>GN=Rpl38 PE=1 SV=1                              | MOUSE | 6  |
| 1506 | 8.48 | 8.54  | 24.24 | 21.55 | sp Q91V64 ISOC1_MOUSE          | Isochorismatase domain-containing protein 1 OS=Mus<br>musculus OX=10090 GN=Isoc1 PE=1 SV=1            | MOUSE | 5  |
| 1507 | 8.45 | 8.49  | 38.40 | 28.27 | sp Q148R9 R9BP_MOUSE           | Regulator of G-protein signaling 9-binding protein<br>OS=Mus musculus OX=10090 GN=Rgs9bp PE=1 SV=2    | MOUSE | 5  |
| 1508 | 8.44 | 8.68  | 23.86 | 14.22 | tr Q3U6T2 Q3U6T2_MOUSE         | Alpha-galactosidase OS=Mus musculus OX=10090<br>GN=Naga PE=2 SV=1                                     | MOUSE | 5  |
| 1509 | 8.43 | 8.71  | 12.90 | 9.14  | sp Q9Z1Q2 ABHGA_MOUSE          | Phosphatidylserine lipase ABHD16A OS=Mus musculus<br>OX=10090 GN=Abhd16a PE=1 SV=3                    | MOUSE | 5  |
| 1510 | 8.42 | 17.35 | 44.44 | 24.50 | sp P05132 KAPCA_MOUSE          | cAMP-dependent protein kinase catalytic subunit alpha<br>OS=Mus musculus OX=10090 GN=Prkaca PE=1 SV=3 | MOUSE | 10 |
| 1511 | 8.42 | 8.52  | 54.46 | 54.46 | tr Q8CFZ0 Q8CFZ0_MOUSE         | SUMO-conjugating enzyme UBC9 OS=Mus musculus<br>OX=10090 GN=Ube2i PE=1 SV=1                           | MOUSE | 5  |
| 1512 | 8.41 | 8.55  | 29.93 | 14.19 | tr Q3TX06 Q3TX06_MOUSE         | Uncharacterized protein OS=Mus musculus OX=10090<br>GN=Gorasp2 PE=2 SV=1                              | MOUSE | 4  |
| 1513 | 8.4  | 8.54  | 24.30 | 11.59 | sp P05480 SRC_MOUSE            | Neuronal proto-oncogene tyrosine-protein kinase Src<br>OS=Mus musculus OX=10090 GN=Src PE=1 SV=5      | MOUSE | 5  |
| 1514 | 8.4  | 8.47  | 27.40 | 10.71 | tr Q80UJ8 Q80UJ8_MOUSE         | Lactb protein OS=Mus musculus OX=10090 GN=Lactb PE=2<br>SV=1                                          | MOUSE | 4  |
| 1515 | 8.38 | 8.44  | 21.84 | 17.41 | tr Q9R1R9 Q9R1R9_MOUSE         | UBE-1a OS=Mus musculus OX=10090 GN=Rdh11 PE=2<br>SV=1                                                 | MOUSE | 4  |
| 1516 | 8.36 | 8.59  | 31.45 | 21.96 | tr A0A1B0GS63 A0A1B0GS63_MOUSE | Arfaptin-2 OS=Mus musculus OX=10090 GN=Arfp2 PE=1<br>SV=1                                             | MOUSE | 5  |
| 1517 | 8.35 | 8.43  | 11.92 | 7.32  | tr Q4G0C0 Q4G0C0_MOUSE         | Sec23 interacting protein OS=Mus musculus OX=10090<br>GN=Sec23ip PE=2 SV=1                            | MOUSE | 4  |

|      |      |       |       |       |                                |                                                                                                            |       |    |
|------|------|-------|-------|-------|--------------------------------|------------------------------------------------------------------------------------------------------------|-------|----|
| 1518 | 8.34 | 8.53  | 18.01 | 6.65  | sp Q3V3R1 C1TM_MOUSE           | Monofunctional C1-tetrahydrofolate synthase, mitochondrial OS=Mus musculus OX=10090 GN=Mthfd1l PE=1 SV=2   | MOUSE | 5  |
| 1519 | 8.33 | 48.18 | 41.19 | 27.01 | tr Q6ZQ49 Q6ZQ49_MOUSE         | Sodium/potassium-transporting ATPase subunit alpha (Fragment) OS=Mus musculus OX=10090 GN=Atp1a2 PE=2 SV=1 | MOUSE | 45 |
| 1520 | 8.33 | 8.54  | 12.11 | 3.38  | tr Q7TSJ0 Q7TSJ0_MOUSE         | DNA (cytosine-5)-methyltransferase OS=Mus musculus OX=10090 GN=Dnmt1 PE=2 SV=1                             | MOUSE | 5  |
| 1521 | 8.32 | 8.34  | 39.89 | 30.90 | tr Q3UCC5 Q3UCC5_MOUSE         | PEST proteolytic signal-containing nuclear protein OS=Mus musculus OX=10090 GN=Pcnp PE=1 SV=1              | MOUSE | 4  |
| 1522 | 8.31 | 8.43  | 49.10 | 28.38 | sp Q9CR00 PSMD9_MOUSE          | 26S proteasome non-ATPase regulatory subunit 9 OS=Mus musculus OX=10090 GN=Psm9 PE=1 SV=1                  | MOUSE | 5  |
| 1523 | 8.31 | 8.41  | 60.10 | 32.51 | sp P34022 RANG_MOUSE           | Ran-specific GTPase-activating protein OS=Mus musculus OX=10090 GN=Ranbp1 PE=1 SV=2                        | MOUSE | 4  |
| 1524 | 8.31 | 8.4   | 17.51 | 6.55  | tr Q571A2 Q571A2_MOUSE         | MKIAA4106 protein (Fragment) OS=Mus musculus OX=10090 GN=Cul2 PE=2 SV=1                                    | MOUSE | 4  |
| 1525 | 8.31 | 8.33  | 32.03 | 21.88 | tr A0A0N4SUH8 A0A0N4SUH8_MOUSE | NFU1 iron-sulfur cluster scaffold homolog, mitochondrial OS=Mus musculus OX=10090 GN=Nfu1 PE=1 SV=1        | MOUSE | 4  |
| 1526 | 8.29 | 8.91  | 34.16 | 31.37 | tr Q8K239 Q8K239_MOUSE         | Tsfm protein (Fragment) OS=Mus musculus OX=10090 GN=Tsfm PE=2 SV=1                                         | MOUSE | 5  |
| 1527 | 8.28 | 8.34  | 25.38 | 15.11 | sp Q9JL56 GDE1_MOUSE           | Glycerophosphodiester phosphodiesterase 1 OS=Mus musculus OX=10090 GN=Gde1 PE=1 SV=1                       | MOUSE | 4  |
| 1528 | 8.27 | 8.41  | 24.27 | 15.06 | tr Q58E65 Q58E65_MOUSE         | Methionine aminopeptidase 2 OS=Mus musculus OX=10090 GN=Metap2 PE=1 SV=1                                   | MOUSE | 5  |
| 1529 | 8.27 | 8.35  | 38.20 | 24.89 | tr Q2VPR3 Q2VPR3_MOUSE         | 2500003M10Rik protein (Fragment) OS=Mus musculus OX=10090 GN=Chtop PE=2 SV=1                               | MOUSE | 5  |
| 1530 | 8.27 | 8.33  | 36.36 | 21.82 | tr Q9DC85 Q9DC85_MOUSE         | 60S ribosomal protein L35a OS=Mus musculus OX=10090 GN=Rpl35a PE=2 SV=1                                    | MOUSE | 4  |
| 1531 | 8.25 | 8.31  | 32.00 | 21.71 | sp P04344 CRGB_MOUSE           | Gamma-crystallin B OS=Mus musculus OX=10090 GN=Crygb PE=2 SV=4                                             | MOUSE | 5  |
| 1532 | 8.23 | 8.46  | 16.27 | 10.43 | sp Q3B7Z2 OSBP1_MOUSE          | Oxysterol-binding protein 1 OS=Mus musculus OX=10090 GN=Osbp PE=1 SV=3                                     | MOUSE | 6  |
| 1533 | 8.21 | 8.44  | 14.15 | 6.38  | sp O35551 RABE1_MOUSE          | Rab GTPase-binding effector protein 1 OS=Mus musculus OX=10090 GN=Rabep1 PE=1 SV=2                         | MOUSE | 4  |

|      |      |       |       |       |                         |                                                                                                       |       |   |
|------|------|-------|-------|-------|-------------------------|-------------------------------------------------------------------------------------------------------|-------|---|
| 1534 | 8.21 | 8.28  | 19.20 | 11.46 | tr Q544D7 Q544D7_MOUSE  | AMP-binding domain-containing protein OS=Mus musculus OX=10090 GN=Slc27a1 PE=1 SV=1                   | MOUSE | 4 |
| 1535 | 8.2  | 8.29  | 38.38 | 33.84 | sp Q9CQW1 YKT6_MOUSE    | Synaptobrevin homolog YKT6 OS=Mus musculus OX=10090 GN=Ykt6 PE=1 SV=1                                 | MOUSE | 5 |
| 1536 | 8.19 | 8.3   | 49.75 | 29.65 | sp Q62393-3 TPD52_MOUSE | Isoform 3 of Tumor protein D52 OS=Mus musculus OX=10090 GN=Tpd52                                      | MOUSE | 6 |
| 1537 | 8.19 | 8.29  | 28.40 | 25.93 | tr Q3TSW9 Q3TSW9_MOUSE  | Uncharacterized protein OS=Mus musculus OX=10090 GN=Tfam PE=2 SV=1                                    | MOUSE | 5 |
| 1538 | 8.18 | 8.24  | 22.94 | 16.18 | sp Q61249 IGBP1_MOUSE   | Immunoglobulin-binding protein 1 OS=Mus musculus OX=10090 GN=Igbp1 PE=1 SV=1                          | MOUSE | 4 |
| 1539 | 8.17 | 10.46 | 4.46  | 1.99  | sp Q9QYX7 PCLO_MOUSE    | Protein piccolo OS=Mus musculus OX=10090 GN=Pclo PE=1 SV=4                                            | MOUSE | 6 |
| 1540 | 8.16 | 8.24  | 24.46 | 17.27 | tr Q3TEE8 Q3TEE8_MOUSE  | Uncharacterized protein OS=Mus musculus OX=10090 GN=Txndc5 PE=1 SV=1                                  | MOUSE | 5 |
| 1541 | 8.15 | 8.26  | 20.07 | 12.34 | sp Q3TIU4 PDE12_MOUSE   | 2',5'-phosphodiesterase 12 OS=Mus musculus OX=10090 GN=Pde12 PE=1 SV=2                                | MOUSE | 5 |
| 1542 | 8.15 | 8.17  | 19.96 | 15.07 | sp Q8BTV2 CPSF7_MOUSE   | Cleavage and polyadenylation specificity factor subunit 7 OS=Mus musculus OX=10090 GN=Cpsf7 PE=1 SV=2 | MOUSE | 5 |
| 1543 | 8.14 | 12.46 | 33.15 | 30.62 | tr Q8BK29 Q8BK29_MOUSE  | Pribosyltran_N domain-containing protein OS=Mus musculus OX=10090 GN=Prpsap1 PE=2 SV=1                | MOUSE | 8 |
| 1544 | 8.14 | 8.22  | 30.61 | 17.27 | sp O08915 AIP_MOUSE     | AH receptor-interacting protein OS=Mus musculus OX=10090 GN=Aip PE=1 SV=1                             | MOUSE | 5 |
| 1545 | 8.14 | 8.19  | 31.67 | 27.60 | sp Q9D1C8 VPS28_MOUSE   | Vacuolar protein sorting-associated protein 28 homolog OS=Mus musculus OX=10090 GN=Vps28 PE=1 SV=1    | MOUSE | 4 |
| 1546 | 8.13 | 8.74  | 46.41 | 32.04 | tr Q14AC7 Q14AC7_MOUSE  | ADP-ribosylation factor-like 1 OS=Mus musculus OX=10090 GN=Arl1 PE=1 SV=1                             | MOUSE | 5 |
| 1547 | 8.13 | 8.31  | 39.32 | 15.38 | sp Q3ULJ0 GPD1L_MOUSE   | Glycerol-3-phosphate dehydrogenase 1-like protein OS=Mus musculus OX=10090 GN=Gpd1l PE=1 SV=2         | MOUSE | 5 |
| 1548 | 8.13 | 8.28  | 20.71 | 15.95 | tr Q3UKN6 Q3UKN6_MOUSE  | Nucleobindin-2 OS=Mus musculus OX=10090 GN=Nucb2 PE=1 SV=1                                            | MOUSE | 5 |
| 1549 | 8.13 | 8.2   | 47.27 | 47.27 | sp P16254 SRP14_MOUSE   | Signal recognition particle 14 kDa protein OS=Mus musculus OX=10090 GN=Srp14 PE=1 SV=1                | MOUSE | 6 |
| 1550 | 8.12 | 8.24  | 27.87 | 27.87 | tr F6TQL3 F6TQL3_MOUSE  | DnaJ homolog subfamily C member 8 (Fragment) OS=Mus musculus OX=10090 GN=Dnajc8 PE=1 SV=1             | MOUSE | 5 |



|      |      |       |       |       |                                |                                                                                                        |       |   |
|------|------|-------|-------|-------|--------------------------------|--------------------------------------------------------------------------------------------------------|-------|---|
| 1551 | 8.12 | 8.2   | 42.91 | 29.15 | sp Q9CQE1 NPS3B_MOUSE          | Protein NipSnap homolog 3B OS=Mus musculus OX=10090 GN=Nipsnap3b PE=1 SV=1                             | MOUSE | 5 |
| 1552 | 8.12 | 8.19  | 31.35 | 31.35 | tr A0A0U1RP13 A0A0U1RP13_MOUSE | CDP-diacylglycerol--inositol 3-phosphatidyltransferase OS=Mus musculus OX=10090 GN=Cdipt PE=1 SV=1     | MOUSE | 6 |
| 1553 | 8.12 | 8.13  | 59.67 | 40.88 | sp Q9DB27 MCTS1_MOUSE          | Malignant T-cell-amplified sequence 1 OS=Mus musculus OX=10090 GN=Mcts1 PE=1 SV=1                      | MOUSE | 4 |
| 1554 | 8.12 | 8.13  | 59.20 | 47.70 | sp Q9CWZ3 RBM8A_MOUSE          | RNA-binding protein 8A OS=Mus musculus OX=10090 GN=Rbm8a PE=1 SV=4                                     | MOUSE | 4 |
| 1555 | 8.1  | 8.23  | 12.05 | 4.92  | tr H3BIW6 H3BIW6_MOUSE         | Phosphoinositide phospholipase C OS=Mus musculus OX=10090 GN=Plch2 PE=1 SV=1                           | MOUSE | 4 |
| 1556 | 8.09 | 8.15  | 53.71 | 30.29 | tr Q3U0D7 Q3U0D7_MOUSE         | ADP-ribosylation factor 6 OS=Mus musculus OX=10090 GN=Arf6 PE=1 SV=1                                   | MOUSE | 4 |
| 1557 | 8.07 | 10.61 | 18.44 | 14.18 | tr Q922Z3 Q922Z3_MOUSE         | Trap1 protein (Fragment) OS=Mus musculus OX=10090 GN=Trap1 PE=2 SV=1                                   | MOUSE | 7 |
| 1558 | 8.06 | 8.07  | 27.52 | 22.87 | tr Q9DA45 Q9DA45_MOUSE         | Uncharacterized protein OS=Mus musculus OX=10090 GN=Chchd6 PE=2 SV=1                                   | MOUSE | 7 |
| 1559 | 8.06 | 8.07  | 43.90 | 42.68 | tr A0A0G2JDW7 A0A0G2JDW7_MOUSE | 40S ribosomal protein S27 (Fragment) OS=Mus musculus OX=10090 GN=Rps27 PE=1 SV=1                       | MOUSE | 5 |
| 1560 | 8.06 | 8.07  | 21.40 | 21.40 | sp Q8R191 SNG3_MOUSE           | Synaptogyrin-3 OS=Mus musculus OX=10090 GN=Syngr3 PE=1 SV=1                                            | MOUSE | 6 |
| 1561 | 8.05 | 8.15  | 29.28 | 22.65 | tr B2RTB0 B2RTB0_MOUSE         | PDGFA associated protein 1 OS=Mus musculus OX=10090 GN=Pdap1 PE=1 SV=1                                 | MOUSE | 6 |
| 1562 | 8.04 | 8.15  | 24.90 | 12.35 | sp Q8BGW1 FTO_MOUSE            | Alpha-ketoglutarate-dependent dioxygenase FTO OS=Mus musculus OX=10090 GN=Fto PE=1 SV=1                | MOUSE | 6 |
| 1563 | 8.04 | 8.07  | 50.87 | 24.35 | sp P97823 LYPA1_MOUSE          | Acyl-protein thioesterase 1 OS=Mus musculus OX=10090 GN=Lypla1 PE=1 SV=1                               | MOUSE | 4 |
| 1564 | 8.03 | 8.12  | 10.44 | 7.99  | tr Q3UMA3 Q3UMA3_MOUSE         | Hepatocyte growth factor-regulated tyrosine kinase substrate OS=Mus musculus OX=10090 GN=Hgs PE=1 SV=1 | MOUSE | 5 |
| 1565 | 8.03 | 8.08  | 45.96 | 37.37 | sp P60904 DNJC5_MOUSE          | DnaJ homolog subfamily C member 5 OS=Mus musculus OX=10090 GN=Dnajc5 PE=1 SV=1                         | MOUSE | 5 |
| 1566 | 8.02 | 8.2   | 8.15  | 4.89  | tr Q91VT0 Q91VT0_MOUSE         | DNA polymerase OS=Mus musculus OX=10090 GN=Pold1 PE=2 SV=1                                             | MOUSE | 6 |

|      |      |        |       |       |                         |                                                                                                           |       |     |
|------|------|--------|-------|-------|-------------------------|-----------------------------------------------------------------------------------------------------------|-------|-----|
| 1567 | 8.02 | 8.16   | 17.06 | 11.69 | sp Q8BNW9 KBTBB_MOUSE   | Kelch repeat and BTB domain-containing protein 11 OS=Mus musculus OX=10090 GN=Kbtbd11 PE=1 SV=3           | MOUSE | 5   |
| 1568 | 8.02 | 8.03   | 52.41 | 33.13 | tr Q3TI65 Q3TI65_MOUSE  | Mitochondrial 18 kDa protein OS=Mus musculus OX=10090 GN=Mtftp1 PE=2 SV=1                                 | MOUSE | 4   |
| 1569 | 8.02 | 8.02   | 38.07 | 32.99 | sp P46414 CDN1B_MOUSE   | Cyclin-dependent kinase inhibitor 1B OS=Mus musculus OX=10090 GN=Cdkn1b PE=1 SV=2                         | MOUSE | 4   |
| 1570 | 8.01 | 22.74  | 34.73 | 28.05 | tr E0CZ78 E0CZ78_MOUSE  | Serine/threonine-protein phosphatase OS=Mus musculus OX=10090 GN=Ppp3cb PE=1 SV=1                         | MOUSE | 13  |
| 1571 | 8.01 | 19.92  | 33.29 | 15.06 | tr Q91WP9 Q91WP9_MOUSE  | Alpha-1,4 glucan phosphorylase OS=Mus musculus OX=10090 GN=Pygl PE=2 SV=1                                 | MOUSE | 11  |
| 1572 | 8.01 | 10.06  | 51.90 | 32.07 | sp Q9ES97-3 RTN3_MOUSE  | Isoform 3 of Reticulon-3 OS=Mus musculus OX=10090 GN=Rtn3                                                 | MOUSE | 5   |
| 1573 | 8    | 127.35 | 85.12 | 83.43 | sp P52480-2 KP YM_MOUSE | Isoform M1 of Pyruvate kinase PKM OS=Mus musculus OX=10090 GN=Pkm                                         | MOUSE | 118 |
| 1574 | 8    | 9.49   | 21.88 | 20.31 | tr Q69ZP5 Q69ZP5_MOUSE  | MKIAA1181 protein (Fragment) OS=Mus musculus OX=10090 GN=Ergic1 PE=2 SV=1                                 | MOUSE | 5   |
| 1575 | 8    | 8.76   | 40.40 | 40.40 | sp Q9CQ75 NDUA2_MOUSE   | NADH dehydrogenase [ubiquinone] 1 alpha subcomplex subunit 2 OS=Mus musculus OX=10090 GN=Ndufa2 PE=1 SV=3 | MOUSE | 5   |
| 1576 | 8    | 8      | 42.06 | 41.12 | tr Q566K0 Q566K0_MOUSE  | High mobility group AT-hook protein 1 OS=Mus musculus OX=10090 GN=Hmga1 PE=2 SV=1                         | MOUSE | 4   |
| 1577 | 8    | 8      | 27.85 | 25.32 | tr Q4VAI2 Q4VAI2_MOUSE  | Low molecular weight cytosolic acid phosphatase OS=Mus musculus OX=10090 GN=Acp1 PE=2 SV=1                | MOUSE | 4   |
| 1578 | 8    | 8      | 46.67 | 46.67 | tr Q8C073 Q8C073_MOUSE  | SH3 domain-binding glutamic acid-rich-like protein OS=Mus musculus OX=10090 GN=Sh3bgrl2 PE=2 SV=1         | MOUSE | 4   |
| 1579 | 8    | 8      | 38.35 | 38.35 | tr B2RY90 B2RY90_MOUSE  | Isoc2a protein OS=Mus musculus OX=10090 GN=Isoc2a PE=2 SV=1                                               | MOUSE | 4   |
| 1580 | 8    | 8      | 54.62 | 54.62 | sp P62315 SMD1_MOUSE    | Small nuclear ribonucleoprotein Sm D1 OS=Mus musculus OX=10090 GN=Snrpd1 PE=1 SV=1                        | MOUSE | 8   |
| 1581 | 7.99 | 8.22   | 27.55 | 11.02 | tr Q3UHY8 Q3UHY8_MOUSE  | Uncharacterized protein OS=Mus musculus OX=10090 GN=Abce1 PE=1 SV=1                                       | MOUSE | 5   |
| 1582 | 7.98 | 8.09   | 11.72 | 10.16 | tr Q3UQM7 Q3UQM7_MOUSE  | Uncharacterized protein OS=Mus musculus OX=10090 GN=Slc7a5 PE=2 SV=1                                      | MOUSE | 4   |

|      |      |       |       |       |                                |                                                                                                     |       |   |
|------|------|-------|-------|-------|--------------------------------|-----------------------------------------------------------------------------------------------------|-------|---|
| 1583 | 7.98 | 8.07  | 30.00 | 18.75 | tr Q3TMZ1 Q3TMZ1_MOUSE         | Pyrroline-5-carboxylate reductase OS=Mus musculus<br>OX=10090 GN=Py <sub>cr</sub> 2 PE=1 SV=1       | MOUSE | 5 |
| 1584 | 7.98 | 8.02  | 30.71 | 17.72 | tr Q4FK54 Q4FK54_MOUSE         | Proteasome (Prosome, macropain) 28 subunit, 3 OS=Mus musculus<br>OX=10090 GN=Psme3 PE=1 SV=1        | MOUSE | 5 |
| 1585 | 7.96 | 8.01  | 56.70 | 43.30 | tr A2AP32 A2AP32_MOUSE         | Complex I-B17 OS=Mus musculus OX=10090 GN=Ndufb6<br>PE=1 SV=1                                       | MOUSE | 4 |
| 1586 | 7.94 | 8.02  | 58.22 | 58.22 | sp Q9CQX2 CYB5B_MOUSE          | Cytochrome b5 type B OS=Mus musculus OX=10090<br>GN=Cyb5b PE=1 SV=1                                 | MOUSE | 5 |
| 1587 | 7.89 | 8.18  | 36.56 | 11.48 | tr Q8BKS6 Q8BKS6_MOUSE         | Prolyl endopeptidase (Fragment) OS=Mus musculus<br>OX=10090 GN=Prepl PE=2 SV=1                      | MOUSE | 5 |
| 1588 | 7.88 | 8.03  | 16.84 | 11.58 | tr Q3THX4 Q3THX4_MOUSE         | Uncharacterized protein OS=Mus musculus OX=10090<br>GN=Vps45 PE=2 SV=1                              | MOUSE | 5 |
| 1589 | 7.87 | 8.04  | 43.77 | 19.15 | sp Q9WUP7 UCHL5_MOUSE          | Ubiquitin carboxyl-terminal hydrolase isozyme L5 OS=Mus musculus<br>OX=10090 GN=Uchl5 PE=1 SV=2     | MOUSE | 6 |
| 1590 | 7.86 | 7.93  | 15.45 | 10.45 | tr Q3TRK3 Q3TRK3_MOUSE         | ADF-H domain-containing protein OS=Mus musculus<br>OX=10090 GN=Dbn1 PE=2 SV=1                       | MOUSE | 4 |
| 1591 | 7.86 | 7.9   | 50.93 | 41.67 | sp P26883 FKBP1A_MOUSE         | Peptidyl-prolyl cis-trans isomerase FKBP1A OS=Mus musculus<br>OX=10090 GN=Fkbp1a PE=1 SV=2          | MOUSE | 4 |
| 1592 | 7.86 | 7.89  | 30.31 | 30.31 | sp Q9DCM0 ETHE1_MOUSE          | Persulfide dioxygenase ETHE1, mitochondrial OS=Mus musculus<br>OX=10090 GN=Ethe1 PE=1 SV=2          | MOUSE | 5 |
| 1593 | 7.83 | 8.07  | 13.02 | 7.56  | tr A0A1Y7VL44 A0A1Y7VL44_MOUSE | Tetratricopeptide repeat protein 7B OS=Mus musculus<br>OX=10090 GN=Ttc7b PE=1 SV=1                  | MOUSE | 6 |
| 1594 | 7.82 | 15.74 | 59.44 | 54.44 | tr Q14BR4 Q14BR4_MOUSE         | ADP-ribosylation factor 4 OS=Mus musculus OX=10090<br>GN=Arf4 PE=1 SV=1                             | MOUSE | 8 |
| 1595 | 7.82 | 8.05  | 31.01 | 19.71 | tr Q3UWH3 Q3UWH3_MOUSE         | Uncharacterized protein OS=Mus musculus OX=10090<br>GN=Vrk1 PE=2 SV=1                               | MOUSE | 5 |
| 1596 | 7.81 | 8.04  | 31.83 | 20.19 | sp Q9ESW4 AGK_MOUSE            | Acylglycerol kinase, mitochondrial OS=Mus musculus<br>OX=10090 GN=Agk PE=1 SV=1                     | MOUSE | 5 |
| 1597 | 7.79 | 8.7   | 13.86 | 11.78 | tr Q8CCV5 Q8CCV5_MOUSE         | Uncharacterized protein OS=Mus musculus OX=10090<br>GN=Esrrb PE=2 SV=1                              | MOUSE | 5 |
| 1598 | 7.76 | 7.9   | 42.77 | 25.23 | tr Q3T9Y8 Q3T9Y8_MOUSE         | Eukaryotic translation initiation factor 3 subunit I OS=Mus musculus<br>OX=10090 GN=Eif3i PE=2 SV=1 | MOUSE | 5 |
| 1599 | 7.75 | 7.86  | 52.45 | 41.26 | tr G5E814 G5E814_MOUSE         | Complex I-B14.7 OS=Mus musculus OX=10090<br>GN=Ndufa11 PE=1 SV=1                                    | MOUSE | 4 |

|      |      |      |       |       |                                |                                                                                               |       |    |
|------|------|------|-------|-------|--------------------------------|-----------------------------------------------------------------------------------------------|-------|----|
| 1600 | 7.74 | 7.84 | 27.01 | 14.44 | tr E9PWB2 E9PWB2_MOUSE         | Casein kinase I isoform alpha OS=Mus musculus OX=10090 GN=Csnk1a1 PE=1 SV=1                   | MOUSE | 4  |
| 1601 | 7.74 | 7.84 | 39.26 | 39.26 | sp P16045 LEG1_MOUSE           | Galectin-1 OS=Mus musculus OX=10090 GN=Lgals1 PE=1 SV=3                                       | MOUSE | 4  |
| 1602 | 7.73 | 7.8  | 37.26 | 28.77 | tr Q8VC72 Q8VC72_MOUSE         | Complex I-23kD OS=Mus musculus OX=10090 GN=Ndufs8 PE=2 SV=2                                   | MOUSE | 5  |
| 1603 | 7.71 | 7.76 | 24.54 | 17.84 | tr Q545Q2 Q545Q2_MOUSE         | Surfeit locus protein 4 OS=Mus musculus OX=10090 GN=Surf4 PE=1 SV=1                           | MOUSE | 4  |
| 1604 | 7.7  | 13.6 | 25.24 | 9.55  | sp P08553 NFM_MOUSE            | Neurofilament medium polypeptide OS=Mus musculus OX=10090 GN=Nefm PE=1 SV=4                   | MOUSE | 7  |
| 1605 | 7.7  | 13.1 | 40.17 | 39.74 | tr Q0PD56 Q0PD56_MOUSE         | Rab5B OS=Mus musculus OX=10090 GN=Rab5b PE=2 SV=1                                             | MOUSE | 7  |
| 1606 | 7.68 | 7.9  | 20.64 | 9.65  | sp Q925I1 ATAD3_MOUSE          | ATPase family AAA domain-containing protein 3 OS=Mus musculus OX=10090 GN=Atad3 PE=1 SV=1     | MOUSE | 5  |
| 1607 | 7.68 | 7.76 | 40.00 | 36.88 | tr Q9CQM8 Q9CQM8_MOUSE         | 60S ribosomal protein L21 OS=Mus musculus OX=10090 GN=Rpl21 PE=1 SV=1                         | MOUSE | 7  |
| 1608 | 7.68 | 7.72 | 39.29 | 39.29 | tr Q3TND1 Q3TND1_MOUSE         | Peptidylprolyl isomerase OS=Mus musculus OX=10090 GN=Fkbp2 PE=1 SV=1                          | MOUSE | 4  |
| 1609 | 7.66 | 87.6 | 54.64 | 53.54 | tr A0A0A6YY91 A0A0A6YY91_MOUSE | Neural cell adhesion molecule 1 (Fragment) OS=Mus musculus OX=10090 GN=Ncam1 PE=1 SV=1        | MOUSE | 67 |
| 1610 | 7.66 | 7.8  | 20.38 | 14.50 | sp Q50H33 KCTD8_MOUSE          | BTB/POZ domain-containing protein KCTD8 OS=Mus musculus OX=10090 GN=Kctd8 PE=1 SV=1           | MOUSE | 6  |
| 1611 | 7.66 | 7.74 | 31.77 | 18.06 | tr D3YU12 D3YU12_MOUSE         | NmrA-like family domain-containing protein 1 OS=Mus musculus OX=10090 GN=Nmral1 PE=1 SV=1     | MOUSE | 4  |
| 1612 | 7.66 | 7.73 | 33.99 | 33.99 | sp Q9CPU4 MGST3_MOUSE          | Microsomal glutathione S-transferase 3 OS=Mus musculus OX=10090 GN=Mgst3 PE=1 SV=1            | MOUSE | 4  |
| 1613 | 7.65 | 7.83 | 14.95 | 12.71 | tr Q8R3X7 Q8R3X7_MOUSE         | Phosphoenolpyruvate carboxykinase (GTP) (Fragment) OS=Mus musculus OX=10090 GN=Pck2 PE=2 SV=1 | MOUSE | 5  |
| 1614 | 7.65 | 7.69 | 15.16 | 11.09 | tr Q9CY49 Q9CY49_MOUSE         | WD_REPEATS_REGION domain-containing protein OS=Mus musculus OX=10090 GN=Tbl2 PE=2 SV=1        | MOUSE | 4  |
| 1615 | 7.64 | 7.75 | 36.68 | 20.46 | tr A0A068BEQ2 A0A068BEQ2_MOUSE | H2-K region protein 6 OS=Mus musculus OX=10090 GN=H2-Ke6 PE=2 SV=1                            | MOUSE | 4  |
| 1616 | 7.63 | 7.75 | 50.00 | 41.55 | tr A7VJ98 A7VJ98_MOUSE         | Glia maturation factor OS=Mus musculus OX=10090 GN=Gmfb PE=2 SV=1                             | MOUSE | 5  |

|      |      |      |       |       |                        |                                                                                                       |       |   |
|------|------|------|-------|-------|------------------------|-------------------------------------------------------------------------------------------------------|-------|---|
| 1617 | 7.63 | 7.72 | 18.28 | 7.84  | tr Q8BH30 Q8BH30_MOUSE | Importin subunit alpha OS=Mus musculus OX=10090 GN=Kpna6 PE=1 SV=1                                    | MOUSE | 4 |
| 1618 | 7.62 | 7.79 | 59.91 | 42.73 | sp P06837 NEUM_MOUSE   | Neuromodulin OS=Mus musculus OX=10090 GN=Gap43 PE=1 SV=1                                              | MOUSE | 5 |
| 1619 | 7.62 | 7.76 | 23.54 | 15.61 | tr Q3TCD4 Q3TCD4_MOUSE | Enoyl-CoA delta isomerase 2 OS=Mus musculus OX=10090 GN=Eci2 PE=1 SV=1                                | MOUSE | 4 |
| 1620 | 7.61 | 9.32 | 10.07 | 3.95  | tr F8WGE3 F8WGE3_MOUSE | ABC-type organic anion transporter ABCA8A OS=Mus musculus OX=10090 GN=Abca8a PE=1 SV=1                | MOUSE | 5 |
| 1621 | 7.61 | 7.75 | 55.81 | 48.84 | tr Q497K3 Q497K3_MOUSE | Sm protein F OS=Mus musculus OX=10090 GN=Snrpf PE=1 SV=1                                              | MOUSE | 5 |
| 1622 | 7.59 | 7.83 | 46.10 | 23.05 | sp P47758 SRPRB_MOUSE  | Signal recognition particle receptor subunit beta OS=Mus musculus OX=10090 GN=Srprb PE=1 SV=1         | MOUSE | 6 |
| 1623 | 7.59 | 7.71 | 49.16 | 36.87 | tr Q3TMX5 Q3TMX5_MOUSE | Mesencephalic astrocyte-derived neurotrophic factor OS=Mus musculus OX=10090 GN=Manf PE=1 SV=1        | MOUSE | 5 |
| 1624 | 7.59 | 7.64 | 40.69 | 40.69 | tr Q3UK70 Q3UK70_MOUSE | 40S ribosomal protein S15 OS=Mus musculus OX=10090 GN=Rps15 PE=2 SV=1                                 | MOUSE | 5 |
| 1625 | 7.57 | 7.96 | 22.07 | 8.83  | tr Q543M7 Q543M7_MOUSE | Importin subunit alpha OS=Mus musculus OX=10090 GN=Kpna3 PE=1 SV=1                                    | MOUSE | 4 |
| 1626 | 7.56 | 7.62 | 10.60 | 7.34  | sp P70699 LYAG_MOUSE   | Lysosomal alpha-glucosidase OS=Mus musculus OX=10090 GN=Gaa PE=1 SV=2                                 | MOUSE | 4 |
| 1627 | 7.51 | 7.57 | 48.15 | 37.04 | sp Q9CQB5 CISD2_MOUSE  | CDGSH iron-sulfur domain-containing protein 2 OS=Mus musculus OX=10090 GN=Cisd2 PE=1 SV=1             | MOUSE | 5 |
| 1628 | 7.49 | 7.64 | 23.26 | 16.01 | sp Q9D1P4 CHRD1_MOUSE  | Cysteine and histidine-rich domain-containing protein 1 OS=Mus musculus OX=10090 GN=Chordc1 PE=1 SV=1 | MOUSE | 4 |
| 1629 | 7.49 | 7.54 | 58.82 | 53.59 | sp Q9D898 ARP5L_MOUSE  | Actin-related protein 2/3 complex subunit 5-like protein OS=Mus musculus OX=10090 GN=Arpc5l PE=1 SV=1 | MOUSE | 4 |
| 1630 | 7.47 | 7.57 | 16.06 | 11.50 | tr Q8BME1 Q8BME1_MOUSE | Phosphoacetylglucosamine mutase OS=Mus musculus OX=10090 GN=Pgm3 PE=2 SV=1                            | MOUSE | 5 |
| 1631 | 7.46 | 7.63 | 43.61 | 38.35 | tr Q5EBJ0 Q5EBJ0_MOUSE | Fatty acid binding protein 3, muscle and heart OS=Mus musculus OX=10090 GN=Fabp3 PE=1 SV=1            | MOUSE | 5 |
| 1632 | 7.46 | 7.6  | 19.61 | 12.30 | sp Q3UUG6 TBC24_MOUSE  | TBC1 domain family member 24 OS=Mus musculus OX=10090 GN=Tbc1d24 PE=1 SV=2                            | MOUSE | 5 |
| 1633 | 7.46 | 7.6  | 25.67 | 22.09 | tr Q0P5W2 Q0P5W2_MOUSE | Thioredoxin domain containing 13 OS=Mus musculus OX=10090 GN=Tmx4 PE=1 SV=1                           | MOUSE | 5 |

|      |      |       |       |       |                                |                                                                                                                               |       |    |
|------|------|-------|-------|-------|--------------------------------|-------------------------------------------------------------------------------------------------------------------------------|-------|----|
| 1634 | 7.46 | 7.49  | 33.33 | 33.33 | tr Q3URU9 Q3URU9_MOUSE         | Retinal rod rhodopsin-sensitive cGMP 3',5'-cyclic phosphodiesterase subunit delta OS=Mus musculus OX=10090 GN=Pde6d PE=2 SV=1 | MOUSE | 4  |
| 1635 | 7.45 | 19.26 | 33.14 | 16.71 | tr Q8BJP2 Q8BJP2_MOUSE         | Uncharacterized protein OS=Mus musculus OX=10090 GN=Ago1 PE=2 SV=1                                                            | MOUSE | 9  |
| 1636 | 7.45 | 7.97  | 20.00 | 15.56 | sp Q9D3A9 TTYH1_MOUSE          | Protein tweety homolog 1 OS=Mus musculus OX=10090 GN=Ttyh1 PE=1 SV=1                                                          | MOUSE | 5  |
| 1637 | 7.43 | 7.67  | 31.94 | 14.54 | sp Q8BIW1 PRUN1_MOUSE          | Exopolyphosphatase PRUNE1 OS=Mus musculus OX=10090 GN=Prune1 PE=1 SV=1                                                        | MOUSE | 4  |
| 1638 | 7.43 | 7.52  | 33.90 | 24.58 | sp Q91VT4 CBR4_MOUSE           | 3-oxoacyl-[acyl-carrier-protein] reductase OS=Mus musculus OX=10090 GN=Cbr4 PE=1 SV=2                                         | MOUSE | 4  |
| 1639 | 7.42 | 7.6   | 27.69 | 10.74 | tr F6Y616 F6Y616_MOUSE         | Polyadenylate-binding protein-interacting protein 1 OS=Mus musculus OX=10090 GN=Paip1 PE=1 SV=2                               | MOUSE | 4  |
| 1640 | 7.41 | 7.58  | 23.61 | 14.81 | tr Q7TMY2 Q7TMY2_MOUSE         | Acyl-Coenzyme A dehydrogenase, short/branched chain OS=Mus musculus OX=10090 GN=Acadsl PE=2 SV=1                              | MOUSE | 5  |
| 1641 | 7.4  | 15.3  | 35.13 | 20.84 | tr Q3UUU4 Q3UUU4_MOUSE         | Septin OS=Mus musculus OX=10090 GN=Septin6 PE=2 SV=1                                                                          | MOUSE | 10 |
| 1642 | 7.4  | 7.68  | 16.11 | 7.73  | tr Q5DTH1 Q5DTH1_MOUSE         | MKIAA4216 protein (Fragment) OS=Mus musculus OX=10090 GN=Ube3a PE=2 SV=1                                                      | MOUSE | 5  |
| 1643 | 7.38 | 8.15  | 13.04 | 7.97  | sp P63154 CRNL1_MOUSE          | Crooked neck-like protein 1 OS=Mus musculus OX=10090 GN=Crnk1l PE=1 SV=1                                                      | MOUSE | 5  |
| 1644 | 7.38 | 7.93  | 28.40 | 13.23 | tr Q3UIH7 Q3UIH7_MOUSE         | Geranylgeranyl transferase type-2 subunit alpha OS=Mus musculus OX=10090 GN=Rabggta PE=2 SV=1                                 | MOUSE | 6  |
| 1645 | 7.38 | 7.74  | 19.65 | 8.24  | tr A0A0R4J034 A0A0R4J034_MOUSE | Pyridoxal-dependent decarboxylase domain-containing protein 1 OS=Mus musculus OX=10090 GN=Pdxdc1 PE=1 SV=1                    | MOUSE | 5  |
| 1646 | 7.38 | 7.56  | 10.54 | 6.96  | sp Q8CGF6 WDR47_MOUSE          | WD repeat-containing protein 47 OS=Mus musculus OX=10090 GN=Wdr47 PE=1 SV=2                                                   | MOUSE | 5  |
| 1647 | 7.37 | 7.56  | 45.97 | 27.01 | sp Q9JJU9 CRBB3_MOUSE          | Beta-crystallin B3 OS=Mus musculus OX=10090 GN=Crybb3 PE=2 SV=3                                                               | MOUSE | 4  |
| 1648 | 7.35 | 7.49  | 22.04 | 12.69 | sp Q9WU79 PROD_MOUSE           | Proline dehydrogenase 1, mitochondrial OS=Mus musculus OX=10090 GN=Prodh PE=1 SV=2                                            | MOUSE | 4  |
| 1649 | 7.34 | 11.66 | 50.25 | 41.79 | tr Q3U0T9 Q3U0T9_MOUSE         | Rab35 OS=Mus musculus OX=10090 GN=Rab35 PE=1 SV=1                                                                             | MOUSE | 6  |

|      |      |       |       |       |                                |                                                                                                       |       |   |
|------|------|-------|-------|-------|--------------------------------|-------------------------------------------------------------------------------------------------------|-------|---|
| 1650 | 7.34 | 7.57  | 38.61 | 27.08 | sp Q9DCS3 MECR_MOUSE           | Enoyl-[acyl-carrier-protein] reductase, mitochondrial OS=Mus musculus OX=10090 GN=Mecr PE=1 SV=2      | MOUSE | 6 |
| 1651 | 7.32 | 7.42  | 11.83 | 9.17  | sp Q9QY42 GPR37_MOUSE          | Prosaposin receptor GPR37 OS=Mus musculus OX=10090 GN=Gpr37 PE=2 SV=1                                 | MOUSE | 4 |
| 1652 | 7.3  | 14.01 | 44.49 | 33.82 | tr Q8JZZ5 Q8JZZ5_MOUSE         | Phosphatidylinositol transfer protein beta isoform OS=Mus musculus OX=10090 GN=Pltpnb PE=1 SV=1       | MOUSE | 8 |
| 1653 | 7.3  | 7.36  | 28.25 | 25.28 | tr Q3UGW4 Q3UGW4_MOUSE         | ATP-dependent Clp protease proteolytic subunit (Fragment) OS=Mus musculus OX=10090 GN=Clpp PE=2 SV=1  | MOUSE | 6 |
| 1654 | 7.29 | 7.34  | 29.78 | 21.32 | tr Q8C2U7 Q8C2U7_MOUSE         | tRNA-binding domain-containing protein OS=Mus musculus OX=10090 GN=Aimp1 PE=2 SV=1                    | MOUSE | 4 |
| 1655 | 7.28 | 7.66  | 20.02 | 6.43  | tr A2AE27 A2AE27_MOUSE         | AMP deaminase OS=Mus musculus OX=10090 GN=Ampd2 PE=1 SV=1                                             | MOUSE | 5 |
| 1656 | 7.28 | 7.43  | 14.66 | 9.09  | tr A0A0R4J124 A0A0R4J124_MOUSE | SRSF protein kinase 2 OS=Mus musculus OX=10090 GN=Sprk2 PE=1 SV=1                                     | MOUSE | 5 |
| 1657 | 7.28 | 7.34  | 9.40  | 9.40  | tr D3YXH0 D3YXH0_MOUSE         | Predicted gene, 49948 OS=Mus musculus OX=10090 GN=Gm49948 PE=4 SV=1                                   | MOUSE | 4 |
| 1658 | 7.27 | 7.35  | 21.05 | 11.44 | tr Q3TDX2 Q3TDX2_MOUSE         | Vesicle-fusing ATPase OS=Mus musculus OX=10090 GN=Vps4a PE=2 SV=1                                     | MOUSE | 4 |
| 1659 | 7.24 | 7.29  | 17.27 | 16.91 | sp Q8VBT0 TMX1_MOUSE           | Thioredoxin-related transmembrane protein 1 OS=Mus musculus OX=10090 GN=Tmx1 PE=1 SV=1                | MOUSE | 6 |
| 1660 | 7.22 | 7.33  | 12.91 | 10.33 | sp Q9D824 FIP1_MOUSE           | Pre-mRNA 3'-end-processing factor FIP1 OS=Mus musculus OX=10090 GN=Fip1l1 PE=1 SV=1                   | MOUSE | 4 |
| 1661 | 7.2  | 7.31  | 37.45 | 35.74 | sp Q9JKD3 SCAM5_MOUSE          | Secretory carrier-associated membrane protein 5 OS=Mus musculus OX=10090 GN=Scamp5 PE=1 SV=1          | MOUSE | 5 |
| 1662 | 7.2  | 7.27  | 28.16 | 19.18 | tr Q3U9U5 Q3U9U5_MOUSE         | B-cell receptor-associated protein OS=Mus musculus OX=10090 GN=Bcap31 PE=2 SV=1                       | MOUSE | 4 |
| 1663 | 7.17 | 7.58  | 48.71 | 30.26 | sp Q8BH58 TIPRL_MOUSE          | TIP41-like protein OS=Mus musculus OX=10090 GN=Tiprl PE=1 SV=1                                        | MOUSE | 4 |
| 1664 | 7.16 | 7.29  | 48.90 | 48.35 | tr Q78IG7 Q78IG7_MOUSE         | Transcription factor BTF3 (Fragment) OS=Mus musculus OX=10090 GN=Btf3l4 PE=2 SV=1                     | MOUSE | 5 |
| 1665 | 7.14 | 7.42  | 27.16 | 12.95 | tr Q6PF96 Q6PF96_MOUSE         | Electron transfer flavoprotein-ubiquinone oxidoreductase OS=Mus musculus OX=10090 GN=Etfhdh PE=1 SV=1 | MOUSE | 6 |

|      |      |       |       |       |                                |                                                                                                         |       |   |
|------|------|-------|-------|-------|--------------------------------|---------------------------------------------------------------------------------------------------------|-------|---|
| 1666 | 7.12 | 7.61  | 12.60 | 10.77 | tr Q561M4 Q561M4_MOUSE         | Target of myb1 homolog (Chicken) OS=Mus musculus<br>OX=10090 GN=Tom1 PE=2 SV=1                          | MOUSE | 4 |
| 1667 | 7.11 | 7.18  | 33.99 | 21.57 | sp Q9D0L7 ARM10_MOUSE          | Armadillo repeat-containing protein 10 OS=Mus musculus<br>OX=10090 GN=Armc10 PE=1 SV=1                  | MOUSE | 4 |
| 1668 | 7.09 | 10.6  | 14.95 | 12.20 | sp Q69ZK9 NLGN2_MOUSE          | Neurologin-2 OS=Mus musculus OX=10090 GN=Nlgn2 PE=1<br>SV=2                                             | MOUSE | 7 |
| 1669 | 7.09 | 7.26  | 23.49 | 16.55 | tr Q8BUU7 Q8BUU7_MOUSE         | N-acetylgalactosamine kinase OS=Mus musculus OX=10090<br>GN=Galk2 PE=1 SV=1                             | MOUSE | 4 |
| 1670 | 7.09 | 7.19  | 31.12 | 17.34 | sp Q91XU3 PI42C_MOUSE          | Phosphatidylinositol 5-phosphate 4-kinase type-2 gamma<br>OS=Mus musculus OX=10090 GN=Pip4k2c PE=1 SV=1 | MOUSE | 5 |
| 1671 | 7.09 | 7.14  | 8.35  | 4.25  | tr E9QKH8 E9QKH8_MOUSE         | Catenin delta-2 OS=Mus musculus OX=10090 GN=Ctnnd2<br>PE=1 SV=1                                         | MOUSE | 4 |
| 1672 | 7.08 | 7.21  | 17.05 | 6.71  | tr A2AQR0 A2AQR0_MOUSE         | Glycerol-3-phosphate dehydrogenase OS=Mus musculus<br>OX=10090 GN=Gpd2 PE=1 SV=1                        | MOUSE | 4 |
| 1673 | 7.08 | 7.14  | 42.28 | 30.87 | tr Q545B6 Q545B6_MOUSE         | Stathmin OS=Mus musculus OX=10090 GN=Stmn1 PE=1<br>SV=1                                                 | MOUSE | 4 |
| 1674 | 7.08 | 7.14  | 58.41 | 38.05 | tr A0A068BGR9 A0A068BGR9_MOUSE | Complex I-B14.5a OS=Mus musculus OX=10090<br>GN=Ndufa7 PE=2 SV=1                                        | MOUSE | 4 |
| 1675 | 7.07 | 7.22  | 18.20 | 11.92 | sp O35114 SCRB2_MOUSE          | Lysosome membrane protein 2 OS=Mus musculus<br>OX=10090 GN=Scarb2 PE=1 SV=3                             | MOUSE | 4 |
| 1676 | 7.06 | 7.36  | 3.32  | 0.85  | sp Q6ZWR6 SYNE1_MOUSE          | Nesprin-1 OS=Mus musculus OX=10090 GN=Syne1 PE=1<br>SV=2                                                | MOUSE | 5 |
| 1677 | 7.06 | 7.24  | 27.48 | 14.45 | sp Q9CX56 PSMD8_MOUSE          | 26S proteasome non-ATPase regulatory subunit 8 OS=Mus<br>musculus OX=10090 GN=Psm8 PE=1 SV=2            | MOUSE | 5 |
| 1678 | 7.05 | 7.45  | 18.39 | 13.84 | tr A2RS22 A2RS22_MOUSE         | Coronin OS=Mus musculus OX=10090 GN=Coro1b PE=1<br>SV=1                                                 | MOUSE | 4 |
| 1679 | 7.05 | 7.18  | 16.43 | 7.72  | tr B2RQS1 B2RQS1_MOUSE         | Striatin-3 OS=Mus musculus OX=10090 GN=Strn3 PE=1<br>SV=1                                               | MOUSE | 4 |
| 1680 | 7    | 9.36  | 45.07 | 29.58 | tr Q4V9W8 Q4V9W8_MOUSE         | Ras-related protein Rab-4 OS=Mus musculus OX=10090<br>GN=Rab4b PE=1 SV=1                                | MOUSE | 5 |
| 1681 | 7    | 7.12  | 59.02 | 32.79 | tr Q9CPX4 Q9CPX4_MOUSE         | Ferritin OS=Mus musculus OX=10090 GN=Ftl1 PE=1 SV=1                                                     | MOUSE | 4 |
| 1682 | 6.99 | 17.81 | 69.23 | 38.46 | tr D3Z6I8 D3Z6I8_MOUSE         | Tropomyosin alpha-3 chain OS=Mus musculus OX=10090<br>GN=Tpm3 PE=1 SV=1                                 | MOUSE | 9 |



|      |      |       |       |       |                        |                                                                                                 |       |   |
|------|------|-------|-------|-------|------------------------|-------------------------------------------------------------------------------------------------|-------|---|
| 1683 | 6.99 | 7.24  | 25.68 | 11.03 | tr Q3TVI6 Q3TVI6_MOUSE | Uncharacterized protein OS=Mus musculus OX=10090 GN=Appl2 PE=1 SV=1                             | MOUSE | 5 |
| 1684 | 6.99 | 7.2   | 20.79 | 9.08  | sp Q922U1 PRPF3_MOUSE  | U4/U6 small nuclear ribonucleoprotein Prp3 OS=Mus musculus OX=10090 GN=Prpf3 PE=1 SV=1          | MOUSE | 4 |
| 1685 | 6.96 | 12.06 | 7.91  | 5.15  | tr E9Q9E1 E9Q9E1_MOUSE | Eukaryotic translation initiation factor 4 gamma 1 OS=Mus musculus OX=10090 GN=Eif4g1 PE=1 SV=1 | MOUSE | 7 |
| 1686 | 6.96 | 8.81  | 16.84 | 8.59  | sp Q811G0 PTHB1_MOUSE  | Protein PTHB1 OS=Mus musculus OX=10090 GN=Bbs9 PE=1 SV=2                                        | MOUSE | 6 |
| 1687 | 6.96 | 8.59  | 28.51 | 14.06 | tr D3Z710 D3Z710_MOUSE | Kinesin light chain OS=Mus musculus OX=10090 GN=Klc3 PE=1 SV=1                                  | MOUSE | 5 |
| 1688 | 6.96 | 7.03  | 58.31 | 20.38 | tr G3UY42 G3UY42_MOUSE | Polyadenylate-binding protein 2 OS=Mus musculus OX=10090 GN=Pabpn1 PE=1 SV=1                    | MOUSE | 5 |
| 1689 | 6.95 | 7.12  | 13.82 | 11.32 | tr Q8BTJ0 Q8BTJ0_MOUSE | WD_REPEATS_REGION domain-containing protein OS=Mus musculus OX=10090 GN=Prpf4 PE=2 SV=1         | MOUSE | 4 |
| 1690 | 6.91 | 7.08  | 23.32 | 14.71 | tr Q543R4 Q543R4_MOUSE | Carboxypeptidase E OS=Mus musculus OX=10090 GN=Cpe PE=1 SV=1                                    | MOUSE | 4 |
| 1691 | 6.9  | 7.04  | 32.45 | 25.28 | sp O88587 COMT_MOUSE   | Catechol O-methyltransferase OS=Mus musculus OX=10090 GN=Comt PE=1 SV=2                         | MOUSE | 4 |
| 1692 | 6.9  | 6.95  | 44.93 | 40.58 | tr Q059I1 Q059I1_MOUSE | 40S ribosomal protein S28 OS=Mus musculus OX=10090 GN=Rps28 PE=1 SV=1                           | MOUSE | 4 |
| 1693 | 6.89 | 8.44  | 35.56 | 20.77 | tr Q5SVF7 Q5SVF7_MOUSE | Uncharacterized protein OS=Mus musculus OX=10090 GN=Nipsnap1 PE=1 SV=1                          | MOUSE | 5 |
| 1694 | 6.88 | 7.03  | 11.67 | 9.73  | sp Q63943 MEF2D_MOUSE  | Myocyte-specific enhancer factor 2D OS=Mus musculus OX=10090 GN=Mef2d PE=1 SV=2                 | MOUSE | 4 |
| 1695 | 6.87 | 6.94  | 28.49 | 13.39 | tr Q3UJK6 Q3UJK6_MOUSE | NAD-dependent protein deacetylase OS=Mus musculus OX=10090 GN=Sirt2 PE=2 SV=1                   | MOUSE | 3 |
| 1696 | 6.86 | 7.07  | 32.07 | 20.65 | tr Q9ESR1 Q9ESR1_MOUSE | Ras homolog OS=Mus musculus OX=10090 GN=Rheb PE=2 SV=1                                          | MOUSE | 4 |
| 1697 | 6.85 | 7.03  | 16.46 | 8.31  | sp Q8VCT3 AMPB_MOUSE   | Aminopeptidase B OS=Mus musculus OX=10090 GN=Rnpep PE=1 SV=2                                    | MOUSE | 4 |
| 1698 | 6.84 | 7.08  | 40.15 | 26.28 | tr Q5M9N5 Q5M9N5_MOUSE | 60S ribosomal protein L28 OS=Mus musculus OX=10090 GN=Rpl28 PE=2 SV=1                           | MOUSE | 4 |
| 1699 | 6.82 | 7.54  | 52.50 | 31.00 | tr Q6ZWQ6 Q6ZWQ6_MOUSE | E2 ubiquitin-conjugating enzyme OS=Mus musculus OX=10090 GN=Ube2k PE=1 SV=1                     | MOUSE | 5 |

|      |      |       |       |       |                                |                                                                                                   |       |   |
|------|------|-------|-------|-------|--------------------------------|---------------------------------------------------------------------------------------------------|-------|---|
| 1700 | 6.81 | 7.66  | 8.11  | 2.74  | tr Q6DFZ1 Q6DFZ1_MOUSE         | Golgi-specific brefeldin A-resistance factor 1 OS=Mus musculus OX=10090 GN=Gbf1 PE=1 SV=1         | MOUSE | 4 |
| 1701 | 6.81 | 6.89  | 14.15 | 5.06  | sp Q80VP0 TCPR1_MOUSE          | Tectonin beta-propeller repeat-containing protein 1 OS=Mus musculus OX=10090 GN=Tecpr1 PE=1 SV=1  | MOUSE | 3 |
| 1702 | 6.81 | 6.85  | 21.95 | 16.26 | tr A0A0R4J1Z3 A0A0R4J1Z3_MOUSE | Transmembrane protein 33 OS=Mus musculus OX=10090 GN=Tmem33 PE=1 SV=1                             | MOUSE | 4 |
| 1703 | 6.8  | 11.37 | 27.17 | 11.75 | tr Q3U5L3 Q3U5L3_MOUSE         | Sorting nexin-2 OS=Mus musculus OX=10090 GN=Snx2 PE=2 SV=1                                        | MOUSE | 6 |
| 1704 | 6.79 | 6.86  | 35.56 | 27.41 | tr Q5PR09 Q5PR09_MOUSE         | Ribosomal protein L32 OS=Mus musculus OX=10090 GN=Rpl32 PE=2 SV=1                                 | MOUSE | 3 |
| 1705 | 6.77 | 6.93  | 34.93 | 24.89 | sp Q6IRU5 CLCB_MOUSE           | Clathrin light chain B OS=Mus musculus OX=10090 GN=Cltb PE=1 SV=1                                 | MOUSE | 4 |
| 1706 | 6.74 | 6.95  | 15.53 | 7.70  | sp P52479 UBP10_MOUSE          | Ubiquitin carboxyl-terminal hydrolase 10 OS=Mus musculus OX=10090 GN=Usp10 PE=1 SV=3              | MOUSE | 4 |
| 1707 | 6.73 | 6.93  | 19.50 | 13.93 | sp O70299 MB211_MOUSE          | Putative nucleotidyltransferase MAB21L1 OS=Mus musculus OX=10090 GN=Mab21l1 PE=2 SV=1             | MOUSE | 5 |
| 1708 | 6.71 | 7     | 9.15  | 3.33  | tr G3UY75 G3UY75_MOUSE         | Protein-tyrosine-phosphatase OS=Mus musculus OX=10090 GN=Ptpcrd PE=1 SV=1                         | MOUSE | 5 |
| 1709 | 6.71 | 6.8   | 13.64 | 11.48 | tr A0A1W2P799 A0A1W2P799_MOUSE | Predicted gene, 49358 (Fragment) OS=Mus musculus OX=10090 GN=Gm49358 PE=3 SV=1                    | MOUSE | 4 |
| 1710 | 6.7  | 12.52 | 63.26 | 35.81 | sp Q9CQD1 RAB5A_MOUSE          | Ras-related protein Rab-5A OS=Mus musculus OX=10090 GN=Rab5a PE=1 SV=1                            | MOUSE | 6 |
| 1711 | 6.7  | 6.83  | 8.63  | 6.32  | sp Q91XL9 OSBL1_MOUSE          | Oxysterol-binding protein-related protein 1 OS=Mus musculus OX=10090 GN=Osbp1a PE=1 SV=2          | MOUSE | 4 |
| 1712 | 6.67 | 6.81  | 20.78 | 9.04  | sp Q8VBZ3 CLPT1_MOUSE          | Cleft lip and palate transmembrane protein 1 homolog OS=Mus musculus OX=10090 GN=Clptm1 PE=1 SV=1 | MOUSE | 5 |
| 1713 | 6.66 | 6.84  | 24.73 | 16.25 | tr A2AN37 A2AN37_MOUSE         | Uridine-cytidine kinase OS=Mus musculus OX=10090 GN=Uck1 PE=1 SV=1                                | MOUSE | 4 |
| 1714 | 6.66 | 6.8   | 24.34 | 17.76 | sp Q8BXZ1 TMX3_MOUSE           | Protein disulfide-isomerase TMX3 OS=Mus musculus OX=10090 GN=Tmx3 PE=1 SV=2                       | MOUSE | 5 |
| 1715 | 6.66 | 6.73  | 12.83 | 5.75  | tr Q8VED0 Q8VED0_MOUSE         | Methylmalonyl-CoA isomerase OS=Mus musculus OX=10090 GN=Mmut PE=2 SV=1                            | MOUSE | 5 |
| 1716 | 6.66 | 6.69  | 11.32 | 11.32 | tr Q4JFN6 Q4JFN6_MOUSE         | NADH-ubiquinone oxidoreductase chain 1 OS=Mus musculus OX=10090 GN=mt-Nd1 PE=3 SV=1               | MOUSE | 4 |

|      |      |      |       |       |                                |                                                                                                                           |       |   |
|------|------|------|-------|-------|--------------------------------|---------------------------------------------------------------------------------------------------------------------------|-------|---|
| 1717 | 6.65 | 6.8  | 7.14  | 4.53  | tr Q3TGG2 Q3TGG2_MOUSE         | Ataxin-2-like protein OS=Mus musculus OX=10090 GN=Atxn2l PE=1 SV=1                                                        | MOUSE | 4 |
| 1718 | 6.65 | 6.76 | 42.26 | 20.50 | sp Q9WTP6 KAD2_MOUSE           | Adenylate kinase 2, mitochondrial OS=Mus musculus OX=10090 GN=Ak2 PE=1 SV=5                                               | MOUSE | 4 |
| 1719 | 6.65 | 6.75 | 30.08 | 29.27 | sp Q6ZWV7 RL35_MOUSE           | 60S ribosomal protein L35 OS=Mus musculus OX=10090 GN=Rpl35 PE=1 SV=1                                                     | MOUSE | 4 |
| 1720 | 6.65 | 6.71 | 7.56  | 3.07  | sp Q6PB44 PTN23_MOUSE          | Tyrosine-protein phosphatase non-receptor type 23 OS=Mus musculus OX=10090 GN=Ptpn23 PE=1 SV=2                            | MOUSE | 3 |
| 1721 | 6.65 | 6.69 | 18.08 | 11.83 | tr Q549A5 Q549A5_MOUSE         | Clusterin OS=Mus musculus OX=10090 GN=Clu PE=1 SV=1                                                                       | MOUSE | 4 |
| 1722 | 6.64 | 6.67 | 17.65 | 13.00 | tr Q8C094 Q8C094_MOUSE         | Mitogen-activated protein kinase (Fragment) OS=Mus musculus OX=10090 GN=Mapk9 PE=2 SV=1                                   | MOUSE | 4 |
| 1723 | 6.63 | 6.72 | 18.00 | 12.44 | tr Q6AXD3 Q6AXD3_MOUSE         | Abi1 protein OS=Mus musculus OX=10090 GN=Abi1 PE=2 SV=1                                                                   | MOUSE | 4 |
| 1724 | 6.62 | 6.78 | 18.55 | 5.21  | sp Q9D2V7 CORO7_MOUSE          | Coronin-7 OS=Mus musculus OX=10090 GN=Coro7 PE=1 SV=2                                                                     | MOUSE | 4 |
| 1725 | 6.62 | 6.73 | 26.01 | 12.38 | tr A0A0R4J0Z3 A0A0R4J0Z3_MOUSE | Aquaporin-4 OS=Mus musculus OX=10090 GN=Aqp4 PE=1 SV=1                                                                    | MOUSE | 4 |
| 1726 | 6.61 | 6.64 | 51.30 | 44.35 | tr Q497N1 Q497N1_MOUSE         | 40S ribosomal protein S26 OS=Mus musculus OX=10090 GN=Rps26 PE=1 SV=1                                                     | MOUSE | 4 |
| 1727 | 6.6  | 9.21 | 21.58 | 7.00  | sp Q9QXK3 COPG2_MOUSE          | Coatomer subunit gamma-2 OS=Mus musculus OX=10090 GN=Copg2 PE=1 SV=1                                                      | MOUSE | 5 |
| 1728 | 6.6  | 8.99 | 28.32 | 19.08 | sp Q9R226 KHDR3_MOUSE          | KH domain-containing, RNA-binding, signal transduction-associated protein 3 OS=Mus musculus OX=10090 GN=Khdrbs3 PE=1 SV=1 | MOUSE | 6 |
| 1729 | 6.6  | 8.65 | 15.42 | 11.30 | tr Q3TA75 Q3TA75_MOUSE         | Uncharacterized protein (Fragment) OS=Mus musculus OX=10090 GN=Fxr2 PE=2 SV=1                                             | MOUSE | 5 |
| 1730 | 6.6  | 6.72 | 12.87 | 7.59  | sp Q8C8N2 SCAI_MOUSE           | Protein SCAI OS=Mus musculus OX=10090 GN=Scai PE=1 SV=2                                                                   | MOUSE | 4 |
| 1731 | 6.59 | 6.68 | 10.34 | 6.57  | tr Q812D5 Q812D5_MOUSE         | Lingerer protein-2a OS=Mus musculus OX=10090 GN=lig-2a PE=2 SV=1                                                          | MOUSE | 4 |
| 1732 | 6.59 | 6.63 | 18.73 | 8.07  | sp Q8VD37 SGIP1_MOUSE          | SH3-containing GRB2-like protein 3-interacting protein 1 OS=Mus musculus OX=10090 GN=Sgip1 PE=1 SV=1                      | MOUSE | 3 |

|      |      |       |       |       |                                |                                                                                                          |       |    |
|------|------|-------|-------|-------|--------------------------------|----------------------------------------------------------------------------------------------------------|-------|----|
| 1733 | 6.56 | 6.9   | 26.69 | 12.02 | sp Q06138 CAB39_MOUSE          | Calcium-binding protein 39 OS=Mus musculus OX=10090 GN=Cab39 PE=1 SV=2                                   | MOUSE | 4  |
| 1734 | 6.56 | 6.79  | 55.00 | 42.50 | tr Q542U7 Q542U7_MOUSE         | LSM6 homolog, U6 small nuclear RNA associated (S. cerevisiae) OS=Mus musculus OX=10090 GN=Lsm6 PE=1 SV=1 | MOUSE | 4  |
| 1735 | 6.56 | 6.65  | 31.17 | 23.38 | tr Q3TKG5 Q3TKG5_MOUSE         | H/ACA ribonucleoprotein complex subunit OS=Mus musculus OX=10090 GN=Gar1 PE=2 SV=1                       | MOUSE | 4  |
| 1736 | 6.53 | 6.61  | 22.01 | 19.31 | tr Q3TMV8 Q3TMV8_MOUSE         | DCN1-like protein OS=Mus musculus OX=10090 PE=2 SV=1                                                     | MOUSE | 4  |
| 1737 | 6.52 | 6.63  | 29.39 | 15.27 | tr Q545Q8 Q545Q8_MOUSE         | Phosphomannomutase OS=Mus musculus OX=10090 GN=Pmm1 PE=1 SV=1                                            | MOUSE | 3  |
| 1738 | 6.51 | 6.89  | 20.43 | 6.94  | tr Q9D323 Q9D323_MOUSE         | Signal transducer and activator of transcription OS=Mus musculus OX=10090 GN=Stat1 PE=2 SV=1             | MOUSE | 5  |
| 1739 | 6.51 | 6.54  | 36.02 | 21.43 | sp Q9D1M0 SEC13_MOUSE          | Protein SEC13 homolog OS=Mus musculus OX=10090 GN=Sec13 PE=1 SV=3                                        | MOUSE | 6  |
| 1740 | 6.5  | 10.42 | 10.36 | 5.25  | tr E9QPI5 E9QPI5_MOUSE         | Sister chromatid cohesion protein PDS5 homolog A OS=Mus musculus OX=10090 GN=Pds5a PE=1 SV=1             | MOUSE | 5  |
| 1741 | 6.5  | 6.6   | 17.77 | 12.65 | tr A2RTH5 A2RTH5_MOUSE         | Leucine carboxyl methyltransferase 1 OS=Mus musculus OX=10090 GN=Lcmt1 PE=1 SV=1                         | MOUSE | 4  |
| 1742 | 6.49 | 10.84 | 33.16 | 31.12 | tr Q4FJM5 Q4FJM5_MOUSE         | Ras homolog gene family, member B OS=Mus musculus OX=10090 GN=Rhob PE=1 SV=1                             | MOUSE | 6  |
| 1743 | 6.49 | 6.61  | 54.50 | 19.91 | sp Q8BWR2 PITH1_MOUSE          | PITH domain-containing protein 1 OS=Mus musculus OX=10090 GN=Pithd1 PE=1 SV=1                            | MOUSE | 4  |
| 1744 | 6.48 | 6.61  | 9.38  | 2.24  | tr A0A0U1RPD8 A0A0U1RPD8_MOUSE | General transcription factor 3C polypeptide 1 OS=Mus musculus OX=10090 GN=Gtf3c1 PE=1 SV=1               | MOUSE | 4  |
| 1745 | 6.47 | 6.5   | 28.91 | 17.01 | sp Q8BR90 CE051_MOUSE          | UPF0600 protein C5orf51 homolog OS=Mus musculus OX=10090 PE=1 SV=1                                       | MOUSE | 4  |
| 1746 | 6.46 | 27.58 | 30.72 | 26.47 | tr F8WGT1 F8WGT1_MOUSE         | Putative adenosylhomocysteinase 3 OS=Mus musculus OX=10090 GN=Ahcy12 PE=1 SV=1                           | MOUSE | 15 |
| 1747 | 6.46 | 6.52  | 20.62 | 15.59 | tr Q3UAP1 Q3UAP1_MOUSE         | Uncharacterized protein OS=Mus musculus OX=10090 GN=Preb PE=1 SV=1                                       | MOUSE | 4  |
| 1748 | 6.46 | 6.49  | 16.52 | 10.13 | tr Q6HAA1 Q6HAA1_MOUSE         | GA-binding protein alpha-subunit OS=Mus musculus OX=10090 GN=Gabpa PE=3 SV=1                             | MOUSE | 3  |

|      |      |       |       |       |                                |                                                                                                               |       |    |
|------|------|-------|-------|-------|--------------------------------|---------------------------------------------------------------------------------------------------------------|-------|----|
| 1749 | 6.45 | 24.86 | 56.06 | 41.82 | tr Q3U8W0 Q3U8W0_MOUSE         | Serine/threonine-protein phosphatase PP1-alpha catalytic subunit OS=Mus musculus OX=10090 GN=Ppp1ca PE=2 SV=1 | MOUSE | 13 |
| 1750 | 6.45 | 15.95 | 34.82 | 30.92 | tr Q3UPA1 Q3UPA1_MOUSE         | Uncharacterized protein OS=Mus musculus OX=10090 GN=Gna11 PE=1 SV=1                                           | MOUSE | 9  |
| 1751 | 6.45 | 6.6   | 49.75 | 31.34 | sp P11352 GPX1_MOUSE           | Glutathione peroxidase 1 OS=Mus musculus OX=10090 GN=Gpx1 PE=1 SV=2                                           | MOUSE | 4  |
| 1752 | 6.45 | 6.57  | 9.83  | 4.48  | sp Q61838 PZP_MOUSE            | Pregnancy zone protein OS=Mus musculus OX=10090 GN=Pzp PE=1 SV=3                                              | MOUSE | 4  |
| 1753 | 6.45 | 6.55  | 14.74 | 11.85 | sp Q91VC9 GHITM_MOUSE          | Growth hormone-inducible transmembrane protein OS=Mus musculus OX=10090 GN=Ghitm PE=1 SV=1                    | MOUSE | 4  |
| 1754 | 6.44 | 6.56  | 22.73 | 12.78 | tr Q8BTX5 Q8BTX5_MOUSE         | Eukaryotic translation initiation factor 3 subunit H OS=Mus musculus OX=10090 GN=Eif3h PE=2 SV=1              | MOUSE | 4  |
| 1755 | 6.44 | 6.47  | 20.06 | 14.45 | tr Q542N8 Q542N8_MOUSE         | Uncharacterized protein OS=Mus musculus OX=10090 GN=Palm PE=2 SV=1                                            | MOUSE | 3  |
| 1756 | 6.44 | 6.47  | 17.13 | 11.53 | tr A0A2R8VK70 A0A2R8VK70_MOUSE | Integrin-associated protein OS=Mus musculus OX=10090 GN=Cd47 PE=1 SV=1                                        | MOUSE | 3  |
| 1757 | 6.43 | 6.76  | 19.35 | 12.20 | sp Q9CQJ4 RING2_MOUSE          | E3 ubiquitin-protein ligase RING2 OS=Mus musculus OX=10090 GN=Rnf2 PE=1 SV=1                                  | MOUSE | 3  |
| 1758 | 6.42 | 6.62  | 18.43 | 10.24 | tr Q5SVF9 Q5SVF9_MOUSE         | THO complex subunit 5 homolog OS=Mus musculus OX=10090 GN=Thoc5 PE=1 SV=1                                     | MOUSE | 4  |
| 1759 | 6.42 | 6.58  | 10.68 | 3.01  | tr E9Q166 E9Q166_MOUSE         | ATPase family, AAA domain-containing 2B OS=Mus musculus OX=10090 GN=Atad2b PE=1 SV=1                          | MOUSE | 4  |
| 1760 | 6.42 | 6.55  | 15.05 | 8.58  | tr Q8BP60 Q8BP60_MOUSE         | Uncharacterized protein OS=Mus musculus OX=10090 GN=Nxf1 PE=2 SV=1                                            | MOUSE | 4  |
| 1761 | 6.42 | 6.53  | 5.99  | 3.91  | tr Q8CGC3 Q8CGC3_MOUSE         | Hdac6 protein OS=Mus musculus OX=10090 GN=Hdac6 PE=1 SV=1                                                     | MOUSE | 4  |
| 1762 | 6.41 | 6.44  | 72.92 | 60.42 | sp P62627 DLRB1_MOUSE          | Dynein light chain roadblock-type 1 OS=Mus musculus OX=10090 GN=Dynlrb1 PE=1 SV=3                             | MOUSE | 4  |
| 1763 | 6.38 | 6.67  | 32.58 | 11.46 | tr Q3UKV0 Q3UKV0_MOUSE         | Eukaryotic translation initiation factor 2B, subunit 3 OS=Mus musculus OX=10090 GN=Eif2b3 PE=1 SV=1           | MOUSE | 4  |
| 1764 | 6.38 | 6.41  | 44.83 | 44.83 | sp Q78IK2 ATPMK_MOUSE          | ATP synthase membrane subunit K, mitochondrial OS=Mus musculus OX=10090 GN=Atp5mk PE=1 SV=1                   | MOUSE | 5  |

|      |      |       |       |       |                                |                                                                                              |       |    |
|------|------|-------|-------|-------|--------------------------------|----------------------------------------------------------------------------------------------|-------|----|
| 1765 | 6.38 | 6.4   | 24.47 | 20.74 | sp Q8R5J9 PRAF3_MOUSE          | PRA1 family protein 3 OS=Mus musculus OX=10090 GN=Arl6ip5 PE=1 SV=2                          | MOUSE | 3  |
| 1766 | 6.35 | 6.38  | 12.53 | 10.31 | sp O35599 OPSG_MOUSE           | Medium-wave-sensitive opsin 1 OS=Mus musculus OX=10090 GN=Opn1mw PE=1 SV=1                   | MOUSE | 3  |
| 1767 | 6.35 | 6.37  | 22.77 | 15.63 | sp Q9D8B3 CHM4B_MOUSE          | Charged multivesicular body protein 4b OS=Mus musculus OX=10090 GN=Chmp4b PE=1 SV=2          | MOUSE | 3  |
| 1768 | 6.34 | 6.49  | 50.92 | 20.86 | tr Q3TL58 Q3TL58_MOUSE         | S-phase kinase-associated protein 1 OS=Mus musculus OX=10090 GN=Skp1 PE=2 SV=1               | MOUSE | 4  |
| 1769 | 6.34 | 6.37  | 58.46 | 38.46 | tr G3UZY2 G3UZY2_MOUSE         | Thioredoxin, mitochondrial (Fragment) OS=Mus musculus OX=10090 GN=Txn2 PE=1 SV=1             | MOUSE | 3  |
| 1770 | 6.33 | 6.36  | 39.46 | 34.69 | tr Q5M9K1 Q5M9K1_MOUSE         | Transthyretin OS=Mus musculus OX=10090 GN=Ttr PE=1 SV=1                                      | MOUSE | 3  |
| 1771 | 6.33 | 6.35  | 14.16 | 9.09  | tr Q8C446 Q8C446_MOUSE         | Gamma-aminobutyric acid receptor subunit beta-3 OS=Mus musculus OX=10090 GN=Gabrb3 PE=1 SV=1 | MOUSE | 3  |
| 1772 | 6.31 | 6.49  | 10.58 | 6.04  | sp Q8BIL5 HOOK1_MOUSE          | Protein Hook homolog 1 OS=Mus musculus OX=10090 GN=Hook1 PE=1 SV=2                           | MOUSE | 4  |
| 1773 | 6.3  | 21.18 | 13.65 | 9.98  | sp Q7TMB8 CYFP1_MOUSE          | Cytoplasmic FMR1-interacting protein 1 OS=Mus musculus OX=10090 GN=Cyfp1 PE=1 SV=1           | MOUSE | 12 |
| 1774 | 6.3  | 6.37  | 18.10 | 16.38 | sp Q921W4 QORL1_MOUSE          | Quinone oxidoreductase-like protein 1 OS=Mus musculus OX=10090 GN=Cryz1l PE=1 SV=1           | MOUSE | 4  |
| 1775 | 6.29 | 6.47  | 19.16 | 16.22 | tr A0A0A6YVU8 A0A0A6YVU8_MOUSE | Predicted pseudogene 9774 OS=Mus musculus OX=10090 GN=Gm9774 PE=3 SV=1                       | MOUSE | 5  |
| 1776 | 6.29 | 6.31  | 29.11 | 17.00 | tr A0A0A6YWB0 A0A0A6YWB0_MOUSE | Muscleblind-like protein 1 OS=Mus musculus OX=10090 GN=Mbnl1 PE=1 SV=1                       | MOUSE | 3  |
| 1777 | 6.27 | 6.39  | 21.58 | 11.15 | tr A2AQL0 A2AQL0_MOUSE         | Non-specific serine/threonine protein kinase OS=Mus musculus OX=10090 GN=Stk39 PE=1 SV=1     | MOUSE | 4  |
| 1778 | 6.27 | 6.37  | 22.61 | 17.31 | tr A0A0N4SVL9 A0A0N4SVL9_MOUSE | Serine/threonine-protein phosphatase OS=Mus musculus OX=10090 GN=Ppp6c PE=1 SV=1             | MOUSE | 4  |
| 1779 | 6.26 | 8.27  | 10.49 | 10.49 | tr Q99K73 Q99K73_MOUSE         | Nrf1 protein OS=Mus musculus OX=10090 GN=Nrf1 PE=1 SV=1                                      | MOUSE | 5  |

|      |      |      |       |       |                                |                                                                                                                |       |   |
|------|------|------|-------|-------|--------------------------------|----------------------------------------------------------------------------------------------------------------|-------|---|
| 1780 | 6.25 | 6.28 | 84.31 | 30.72 | sp Q9D1L0 CHCH2_MOUSE          | Coiled-coil-helix-coiled-coil-helix domain-containing protein 2 OS=Mus musculus OX=10090 GN=Chchd2 PE=2 SV=1   | MOUSE | 5 |
| 1781 | 6.22 | 6.24 | 32.98 | 25.13 | tr Q8C5M4 Q8C5M4_MOUSE         | Uncharacterized protein OS=Mus musculus OX=10090 GN=Pdcd6 PE=2 SV=1                                            | MOUSE | 3 |
| 1782 | 6.21 | 6.41 | 33.94 | 21.17 | tr Q544R1 Q544R1_MOUSE         | Pyridoxal phosphate homeostasis protein OS=Mus musculus OX=10090 GN=Plpbp PE=1 SV=1                            | MOUSE | 4 |
| 1783 | 6.21 | 6.3  | 20.91 | 16.38 | tr Q5D0A4 Q5D0A4_MOUSE         | Stx1a protein (Fragment) OS=Mus musculus OX=10090 GN=Stx1a PE=2 SV=1                                           | MOUSE | 4 |
| 1784 | 6.2  | 6.22 | 13.96 | 10.47 | tr A0A0R4J0T5 A0A0R4J0T5_MOUSE | CUGBP Elav-like family member 1 OS=Mus musculus OX=10090 GN=Celf1 PE=1 SV=1                                    | MOUSE | 4 |
| 1785 | 6.2  | 6.22 | 21.54 | 14.46 | tr Q3UMP2 Q3UMP2_MOUSE         | 3-hydroxy-3-methylglutarate-CoA lyase OS=Mus musculus OX=10090 GN=Hmgcl PE=2 SV=1                              | MOUSE | 3 |
| 1786 | 6.19 | 8.23 | 9.42  | 6.44  | sp P04104 K2C1_MOUSE           | Keratin, type II cytoskeletal 1 OS=Mus musculus OX=10090 GN=Krt1 PE=1 SV=4                                     | MOUSE | 5 |
| 1787 | 6.19 | 6.26 | 20.82 | 20.48 | tr Q3TKQ3 Q3TKQ3_MOUSE         | Ribosomal RNA-processing protein 4 OS=Mus musculus OX=10090 GN=Exosc2 PE=1 SV=1                                | MOUSE | 5 |
| 1788 | 6.19 | 6.21 | 33.05 | 16.24 | sp Q9JJK7 TMOD2_MOUSE          | Tropomodulin-2 OS=Mus musculus OX=10090 GN=Tmod2 PE=1 SV=2                                                     | MOUSE | 3 |
| 1789 | 6.19 | 6.2  | 57.89 | 48.42 | tr A0A087WQE6 A0A087WQE6_MOUSE | Elongin-C (Fragment) OS=Mus musculus OX=10090 GN=Eloc PE=1 SV=1                                                | MOUSE | 3 |
| 1790 | 6.19 | 6.2  | 51.18 | 44.88 | tr Q3U8H8 Q3U8H8_MOUSE         | NTF2 domain-containing protein OS=Mus musculus OX=10090 PE=2 SV=1                                              | MOUSE | 5 |
| 1791 | 6.18 | 8.46 | 13.53 | 10.42 | tr A0A087WQS2 A0A087WQS2_MOUSE | Basic leucine zipper and W2 domain-containing protein 1 OS=Mus musculus OX=10090 GN=Bzw1 PE=1 SV=1             | MOUSE | 5 |
| 1792 | 6.18 | 6.2  | 35.06 | 25.97 | tr Q8BG13 Q8BG13_MOUSE         | RNA-binding protein 3 OS=Mus musculus OX=10090 GN=Rbm3 PE=1 SV=1                                               | MOUSE | 4 |
| 1793 | 6.17 | 6.31 | 11.13 | 5.70  | tr Q3UJA5 Q3UJA5_MOUSE         | Uncharacterized protein OS=Mus musculus OX=10090 GN=Asap1 PE=2 SV=1                                            | MOUSE | 4 |
| 1794 | 6.16 | 6.17 | 39.65 | 26.87 | sp Q8R0F8 FAHD1_MOUSE          | Acylpyruvase FAHD1, mitochondrial OS=Mus musculus OX=10090 GN=Fahd1 PE=1 SV=2                                  | MOUSE | 3 |
| 1795 | 6.15 | 6.36 | 9.38  | 4.83  | tr E9Q3K3 E9Q3K3_MOUSE         | Arf-GAP with GTPase, ANK repeat and PH domain-containing protein 1 OS=Mus musculus OX=10090 GN=Agap1 PE=1 SV=3 | MOUSE | 4 |

|      |      |       |       |       |                        |                                                                                                     |       |    |
|------|------|-------|-------|-------|------------------------|-----------------------------------------------------------------------------------------------------|-------|----|
| 1796 | 6.15 | 6.32  | 15.97 | 12.39 | tr E9QM06 E9QM06_MOUSE | Telomeric repeat-binding factor 2 OS=Mus musculus OX=10090 GN=Terf2 PE=1 SV=1                       | MOUSE | 4  |
| 1797 | 6.14 | 6.2   | 11.45 | 4.42  | tr Q3TMP1 Q3TMP1_MOUSE | General transcription factor IIIC, polypeptide 3 OS=Mus musculus OX=10090 GN=Gtf3c3 PE=1 SV=1       | MOUSE | 3  |
| 1798 | 6.12 | 19.76 | 44.92 | 31.36 | sp B2RSH2 GNAI1_MOUSE  | Guanine nucleotide-binding protein G(i) subunit alpha-1 OS=Mus musculus OX=10090 GN=Gnai1 PE=1 SV=1 | MOUSE | 12 |
| 1799 | 6.12 | 6.13  | 39.84 | 39.84 | tr Q4VAG4 Q4VAG4_MOUSE | Ribosomal protein L22 OS=Mus musculus OX=10090 GN=Rpl22 PE=1 SV=1                                   | MOUSE | 4  |
| 1800 | 6.11 | 6.29  | 38.04 | 23.91 | sp Q8C570 RAE1L_MOUSE  | mRNA export factor OS=Mus musculus OX=10090 GN=Rae1 PE=1 SV=1                                       | MOUSE | 5  |
| 1801 | 6.11 | 6.22  | 42.15 | 29.12 | sp Q3UGC7 E13JA_MOUSE  | Eukaryotic translation initiation factor 3 subunit J-A OS=Mus musculus OX=10090 GN=Eif3j1 PE=2 SV=1 | MOUSE | 5  |
| 1802 | 6.1  | 6.27  | 22.40 | 12.30 | tr D3Z6W3 D3Z6W3_MOUSE | Retinol dehydrogenase OS=Mus musculus OX=10090 GN=Rdh8 PE=3 SV=1                                    | MOUSE | 4  |
| 1803 | 6.1  | 6.18  | 26.18 | 13.82 | tr Q9DB22 Q9DB22_MOUSE | RPOLD domain-containing protein OS=Mus musculus OX=10090 PE=2 SV=1                                  | MOUSE | 3  |
| 1804 | 6.1  | 6.13  | 20.96 | 7.69  | tr A6H669 A6H669_MOUSE | Bardet-Biedl syndrome 4 (Human) OS=Mus musculus OX=10090 GN=Bbs4 PE=2 SV=1                          | MOUSE | 3  |
| 1805 | 6.08 | 6.29  | 22.49 | 22.49 | tr Q9CSK4 Q9CSK4_MOUSE | Uncharacterized protein (Fragment) OS=Mus musculus OX=10090 GN=Lrrc57 PE=2 SV=1                     | MOUSE | 6  |
| 1806 | 6.08 | 6.09  | 17.31 | 12.14 | tr Q3U6V5 Q3U6V5_MOUSE | Eukaryotic peptide chain release factor subunit 1 OS=Mus musculus OX=10090 GN=Etf1 PE=2 SV=1        | MOUSE | 4  |
| 1807 | 6.08 | 6.09  | 35.37 | 25.85 | tr Q3V1C8 Q3V1C8_MOUSE | Bis(5'-nucleosyl)-tetraphosphatase [asymmetrical] OS=Mus musculus OX=10090 GN=Nudt2 PE=2 SV=1       | MOUSE | 3  |
| 1808 | 6.07 | 6.09  | 13.51 | 6.98  | tr Q9DBZ6 Q9DBZ6_MOUSE | Uncharacterized protein OS=Mus musculus OX=10090 GN=Abcd3 PE=2 SV=1                                 | MOUSE | 3  |
| 1809 | 6.06 | 8.86  | 40.93 | 31.61 | sp Q91X97 NCALD_MOUSE  | Neurocalcin-delta OS=Mus musculus OX=10090 GN=Ncald PE=1 SV=4                                       | MOUSE | 7  |
| 1810 | 6.06 | 6.08  | 28.00 | 24.00 | tr Q58EA6 Q58EA6_MOUSE | 40S ribosomal protein S25 OS=Mus musculus OX=10090 GN=Rps25 PE=1 SV=1                               | MOUSE | 3  |
| 1811 | 6.06 | 6.07  | 55.39 | 33.82 | sp Q64152 BTF3_MOUSE   | Transcription factor BTF3 OS=Mus musculus OX=10090 GN=Btf3 PE=1 SV=3                                | MOUSE | 3  |



|      |      |       |       |       |                                |                                                                                                                           |       |    |
|------|------|-------|-------|-------|--------------------------------|---------------------------------------------------------------------------------------------------------------------------|-------|----|
| 1812 | 6.06 | 6.07  | 20.94 | 15.94 | sp Q8R010 AIMP2_MOUSE          | Aminoacyl tRNA synthase complex-interacting multifunctional protein 2 OS=Mus musculus OX=10090 GN=Aimp2 PE=1 SV=2         | MOUSE | 3  |
| 1813 | 6.05 | 6.15  | 69.57 | 59.13 | sp P99027 RLA2_MOUSE           | 60S acidic ribosomal protein P2 OS=Mus musculus OX=10090 GN=Rplp2 PE=1 SV=3                                               | MOUSE | 3  |
| 1814 | 6.05 | 6.14  | 43.48 | 19.32 | tr Q8C988 Q8C988_MOUSE         | MPN domain-containing protein OS=Mus musculus OX=10090 PE=2 SV=1                                                          | MOUSE | 3  |
| 1815 | 6.05 | 6.13  | 18.17 | 6.48  | tr D3YVV7 D3YVV7_MOUSE         | NOVA alternative-splicing regulator 2 OS=Mus musculus OX=10090 GN=Nova2 PE=1 SV=3                                         | MOUSE | 3  |
| 1816 | 6.04 | 6.16  | 15.68 | 11.35 | tr Q9CQG4 Q9CQG4_MOUSE         | Receptor expression-enhancing protein OS=Mus musculus OX=10090 GN=Reep5 PE=2 SV=1                                         | MOUSE | 4  |
| 1817 | 6.04 | 6.04  | 33.87 | 13.42 | sp Q9WTX2 PRKRA_MOUSE          | Interferon-inducible double-stranded RNA-dependent protein kinase activator A OS=Mus musculus OX=10090 GN=Prkra PE=1 SV=1 | MOUSE | 3  |
| 1818 | 6.03 | 6.2   | 12.40 | 7.85  | tr Q3TEF1 Q3TEF1_MOUSE         | Glutamate--cysteine ligase OS=Mus musculus OX=10090 GN=Gdc PE=1 SV=1                                                      | MOUSE | 5  |
| 1819 | 6.02 | 43.84 | 71.35 | 60.48 | tr Q3TG92 Q3TG92_MOUSE         | Uncharacterized protein OS=Mus musculus OX=10090 GN=Actc1 PE=2 SV=1                                                       | MOUSE | 32 |
| 1820 | 6.02 | 6.07  | 25.70 | 17.32 | tr Q4FJR0 Q4FJR0_MOUSE         | Nudt4 protein OS=Mus musculus OX=10090 GN=Nudt4 PE=1 SV=1                                                                 | MOUSE | 3  |
| 1821 | 6.02 | 6.02  | 20.33 | 20.33 | tr Q792Z1 Q792Z1_MOUSE         | Trypsin 10 OS=Mus musculus OX=10090 GN=Try10 PE=1 SV=1                                                                    | MOUSE | 9  |
| 1822 | 6.02 | 6.02  | 15.80 | 14.39 | sp Q8QZY9 SF3B4_MOUSE          | Splicing factor 3B subunit 4 OS=Mus musculus OX=10090 GN=Sf3b4 PE=1 SV=1                                                  | MOUSE | 4  |
| 1823 | 6.01 | 6.74  | 39.89 | 39.33 | sp Q9CPT5 NOP16_MOUSE          | Nucleolar protein 16 OS=Mus musculus OX=10090 GN=Nop16 PE=1 SV=1                                                          | MOUSE | 5  |
| 1824 | 6.01 | 6.15  | 19.32 | 11.79 | tr Q548L4 Q548L4_MOUSE         | Glutamate decarboxylase OS=Mus musculus OX=10090 GN=Gad2 PE=1 SV=1                                                        | MOUSE | 4  |
| 1825 | 6.01 | 6.09  | 18.33 | 4.75  | tr B9EI57 B9EI57_MOUSE         | SAFB-like, transcription modulator OS=Mus musculus OX=10090 GN=Sltn PE=2 SV=1                                             | MOUSE | 3  |
| 1826 | 6.01 | 6.02  | 47.06 | 31.62 | tr A0A1W2P729 A0A1W2P729_MOUSE | Protein canopy homolog 2 (Fragment) OS=Mus musculus OX=10090 GN=Cnpy2 PE=1 SV=1                                           | MOUSE | 4  |
| 1827 | 6.01 | 6.01  | 31.34 | 23.88 | tr Q4VAF0 Q4VAF0_MOUSE         | Acyphosphatase (Fragment) OS=Mus musculus OX=10090 GN=Acyp1 PE=2 SV=1                                                     | MOUSE | 3  |

|      |      |       |       |       |                        |                                                                                                   |       |    |
|------|------|-------|-------|-------|------------------------|---------------------------------------------------------------------------------------------------|-------|----|
| 1828 | 6.01 | 6.01  | 19.84 | 13.77 | tr Q8R0J2 Q8R0J2_MOUSE | Mannose-P-dolichol utilization defect 1 protein OS=Mus musculus OX=10090 GN=Mpdu1 PE=1 SV=1       | MOUSE | 3  |
| 1829 | 6.01 | 6.01  | 32.89 | 23.03 | tr Q3UG43 Q3UG43_MOUSE | Macro domain-containing protein OS=Mus musculus OX=10090 GN=Oard1 PE=2 SV=1                       | MOUSE | 4  |
| 1830 | 6.01 | 6.01  | 23.50 | 19.50 | tr B1AZ39 B1AZ39_MOUSE | Chromatin modifying protein 6 OS=Mus musculus OX=10090 GN=Chmp6 PE=1 SV=1                         | MOUSE | 3  |
| 1831 | 6.01 | 6.01  | 33.64 | 26.36 | sp P83870 PHF5A_MOUSE  | PHD finger-like domain-containing protein 5A OS=Mus musculus OX=10090 GN=Phf5a PE=1 SV=1          | MOUSE | 3  |
| 1832 | 6.01 | 6.01  | 42.39 | 29.35 | sp P62305 RUXE_MOUSE   | Small nuclear ribonucleoprotein E OS=Mus musculus OX=10090 GN=Snrpe PE=1 SV=1                     | MOUSE | 4  |
| 1833 | 6    | 22.84 | 79.61 | 79.61 | tr Q5NC81 Q5NC81_MOUSE | Nucleoside diphosphate kinase OS=Mus musculus OX=10090 GN=Nme1 PE=1 SV=1                          | MOUSE | 14 |
| 1834 | 6    | 10    | 35.00 | 35.00 | sp O55042 SYUA_MOUSE   | Alpha-synuclein OS=Mus musculus OX=10090 GN=SncA PE=1 SV=2                                        | MOUSE | 5  |
| 1835 | 6    | 8.21  | 28.84 | 16.71 | sp Q9CYI4 LUC7L_MOUSE  | Putative RNA-binding protein Luc7-like 1 OS=Mus musculus OX=10090 GN=Luc7l PE=1 SV=2              | MOUSE | 6  |
| 1836 | 6    | 6.03  | 17.23 | 13.51 | tr A2AEX8 A2AEX8_MOUSE | Four and a half LIM domains protein 1 OS=Mus musculus OX=10090 GN=Fhl1 PE=1 SV=1                  | MOUSE | 3  |
| 1837 | 6    | 6     | 23.62 | 13.39 | tr Q9QYT9 Q9QYT9_MOUSE | Major prion protein OS=Mus musculus OX=10090 GN=Prnpb PE=3 SV=1                                   | MOUSE | 3  |
| 1838 | 6    | 6     | 34.48 | 34.48 | tr Q9CZI5 Q9CZI5_MOUSE | 40S ribosomal protein S23 OS=Mus musculus OX=10090 GN=Rps23 PE=2 SV=1                             | MOUSE | 4  |
| 1839 | 6    | 6     | 21.63 | 21.63 | tr Q7TQJ3 Q7TQJ3_MOUSE | Protein-ribulosamine 3-kinase OS=Mus musculus OX=10090 GN=Fn3k PE=1 SV=1                          | MOUSE | 3  |
| 1840 | 6    | 6     | 27.54 | 27.54 | tr Q3UWG5 Q3UWG5_MOUSE | Tetraspanin OS=Mus musculus OX=10090 GN=Cd81 PE=2 SV=1                                            | MOUSE | 4  |
| 1841 | 6    | 6     | 22.47 | 22.47 | sp Q9JIG8 PRAF2_MOUSE  | PRA1 family protein 2 OS=Mus musculus OX=10090 GN=Praf2 PE=1 SV=1                                 | MOUSE | 3  |
| 1842 | 6    | 6     | 40.46 | 40.46 | sp Q9CWW6 PIN4_MOUSE   | Peptidyl-prolyl cis-trans isomerase NIMA-interacting 4 OS=Mus musculus OX=10090 GN=Pin4 PE=1 SV=1 | MOUSE | 3  |
| 1843 | 6    | 6     | 27.72 | 27.72 | sp P63166 SUMO1_MOUSE  | Small ubiquitin-related modifier 1 OS=Mus musculus OX=10090 GN=Sumo1 PE=1 SV=1                    | MOUSE | 3  |

|      |      |       |       |       |                                |                                                                                                                             |       |    |
|------|------|-------|-------|-------|--------------------------------|-----------------------------------------------------------------------------------------------------------------------------|-------|----|
| 1844 | 5.99 | 6.07  | 53.37 | 19.69 | sp Q66GT5 PTPM1_MOUSE          | Phosphatidylglycerophosphatase and protein-tyrosine phosphatase 1 OS=Mus musculus OX=10090 GN=Ptpmt1 PE=1 SV=1              | MOUSE | 4  |
| 1845 | 5.98 | 25.29 | 61.54 | 48.95 | sp P27661 H2AX_MOUSE           | Histone H2AX OS=Mus musculus OX=10090 GN=H2ax PE=1 SV=2                                                                     | MOUSE | 39 |
| 1846 | 5.98 | 6.08  | 39.13 | 15.65 | sp Q9JKB1 UCHL3_MOUSE          | Ubiquitin carboxyl-terminal hydrolase isozyme L3 OS=Mus musculus OX=10090 GN=Uchl3 PE=1 SV=2                                | MOUSE | 3  |
| 1847 | 5.98 | 6.07  | 15.19 | 10.34 | tr Q9D2D1 Q9D2D1_MOUSE         | Carboxypeptidase OS=Mus musculus OX=10090 GN=Ctsa PE=2 SV=1                                                                 | MOUSE | 3  |
| 1848 | 5.98 | 6.04  | 9.38  | 4.61  | tr Q571B0 Q571B0_MOUSE         | Transmembrane 9 superfamily member (Fragment) OS=Mus musculus OX=10090 GN=Tm9sf3 PE=2 SV=1                                  | MOUSE | 3  |
| 1849 | 5.97 | 6.04  | 18.14 | 14.64 | tr Q7TN25 Q7TN25_MOUSE         | Sf3a2 protein OS=Mus musculus OX=10090 GN=Sf3a2 PE=2 SV=1                                                                   | MOUSE | 5  |
| 1850 | 5.95 | 19.43 | 36.57 | 23.64 | tr Q6ZWS7 Q6ZWS7_MOUSE         | Calcium/calmodulin-dependent protein kinase OS=Mus musculus OX=10090 GN=Camk2g PE=2 SV=1                                    | MOUSE | 14 |
| 1851 | 5.95 | 6.05  | 24.93 | 11.76 | sp Q64442 DHSO_MOUSE           | Sorbitol dehydrogenase OS=Mus musculus OX=10090 GN=Sord PE=1 SV=3                                                           | MOUSE | 3  |
| 1852 | 5.95 | 6.04  | 21.46 | 21.46 | sp Q9D7S9 CHMP5_MOUSE          | Charged multivesicular body protein 5 OS=Mus musculus OX=10090 GN=Chmp5 PE=1 SV=1                                           | MOUSE | 4  |
| 1853 | 5.94 | 6.02  | 12.84 | 8.21  | tr B9EHY2 B9EHY2_MOUSE         | CAAX prenyl protease OS=Mus musculus OX=10090 GN=Zmpste24 PE=1 SV=1                                                         | MOUSE | 3  |
| 1854 | 5.94 | 5.98  | 14.12 | 9.92  | tr Q3UD03 Q3UD03_MOUSE         | CYTOSOL_AP domain-containing protein OS=Mus musculus OX=10090 GN=Npepl1 PE=2 SV=1                                           | MOUSE | 4  |
| 1855 | 5.93 | 5.97  | 61.73 | 55.56 | tr Q3UI46 Q3UI46_MOUSE         | NEDD8 OS=Mus musculus OX=10090 GN=Nedd8 PE=1 SV=1                                                                           | MOUSE | 3  |
| 1856 | 5.92 | 6     | 38.99 | 30.82 | tr Q8C1Z9 Q8C1Z9_MOUSE         | GOLD domain-containing protein OS=Mus musculus OX=10090 GN=Tmed2 PE=2 SV=1                                                  | MOUSE | 3  |
| 1857 | 5.91 | 6.13  | 22.05 | 9.94  | tr Q5SWN2 Q5SWN2_MOUSE         | Replication protein A subunit OS=Mus musculus OX=10090 GN=Rpa1 PE=1 SV=2                                                    | MOUSE | 5  |
| 1858 | 5.91 | 6.01  | 21.83 | 15.63 | tr A0A158SIT3 A0A158SIT3_MOUSE | Ortholog of family with sequence similarity 50, member A FAM50A (Homo sapiens) OS=Mus musculus OX=10090 GN=Fam50a PE=4 SV=1 | MOUSE | 4  |
| 1859 | 5.91 | 6     | 36.89 | 21.78 | sp Q99LS3 SERB_MOUSE           | Phosphoserine phosphatase OS=Mus musculus OX=10090 GN=Psphe PE=1 SV=1                                                       | MOUSE | 3  |

|      |      |      |       |       |                                |                                                                                          |       |   |
|------|------|------|-------|-------|--------------------------------|------------------------------------------------------------------------------------------|-------|---|
| 1860 | 5.9  | 6.03 | 39.53 | 39.53 | sp P62488 RPB7_MOUSE           | DNA-directed RNA polymerase II subunit RPB7 OS=Mus musculus OX=10090 GN=Polr2g PE=1 SV=1 | MOUSE | 5 |
| 1861 | 5.89 | 5.96 | 23.26 | 23.26 | sp P63028 TCTP_MOUSE           | Translationally-controlled tumor protein OS=Mus musculus OX=10090 GN=Tpt1 PE=1 SV=1      | MOUSE | 3 |
| 1862 | 5.87 | 6.09 | 19.09 | 12.40 | sp Q3THK3 T2FA_MOUSE           | General transcription factor IIF subunit 1 OS=Mus musculus OX=10090 GN=Gtf2f1 PE=1 SV=2  | MOUSE | 5 |
| 1863 | 5.87 | 6.02 | 44.55 | 44.55 | tr F7CTF8 F7CTF8_MOUSE         | Mitochondrial fission factor (Fragment) OS=Mus musculus OX=10090 GN=Mff PE=1 SV=1        | MOUSE | 4 |
| 1864 | 5.86 | 6.16 | 17.42 | 10.48 | sp Q7TSV4 PGM2_MOUSE           | Phosphoglucosyltransferase-2 OS=Mus musculus OX=10090 GN=Pgm2 PE=1 SV=1                  | MOUSE | 5 |
| 1865 | 5.86 | 6    | 11.31 | 3.66  | tr Z4YJU8 Z4YJU8_MOUSE         | Golgin subfamily A member 2 OS=Mus musculus OX=10090 GN=Golga2 PE=1 SV=3                 | MOUSE | 3 |
| 1866 | 5.86 | 5.93 | 43.81 | 32.38 | sp P10639 THIO_MOUSE           | Thioredoxin OS=Mus musculus OX=10090 GN=Txn PE=1 SV=3                                    | MOUSE | 3 |
| 1867 | 5.86 | 5.89 | 24.43 | 12.05 | tr Q9CWQ7 Q9CWQ7_MOUSE         | Uncharacterized protein OS=Mus musculus OX=10090 GN=Ufd1 PE=2 SV=1                       | MOUSE | 3 |
| 1868 | 5.85 | 8    | 35.60 | 28.27 | sp Q61686 CBX5_MOUSE           | Chromobox protein homolog 5 OS=Mus musculus OX=10090 GN=Cbx5 PE=1 SV=1                   | MOUSE | 4 |
| 1869 | 5.85 | 5.94 | 13.54 | 5.25  | tr A0A0R4J087 A0A0R4J087_MOUSE | Transporter OS=Mus musculus OX=10090 GN=Slc6a17 PE=1 SV=1                                | MOUSE | 3 |
| 1870 | 5.85 | 5.93 | 56.04 | 48.35 | tr B1ARW4 B1ARW4_MOUSE         | Complex I-15 kDa (Fragment) OS=Mus musculus OX=10090 GN=Ndufs5 PE=1 SV=1                 | MOUSE | 4 |
| 1871 | 5.85 | 5.89 | 19.66 | 19.66 | sp Q9CXW4 RL11_MOUSE           | 60S ribosomal protein L11 OS=Mus musculus OX=10090 GN=Rpl11 PE=1 SV=4                    | MOUSE | 3 |
| 1872 | 5.84 | 5.96 | 44.97 | 17.46 | tr Q3TP62 Q3TP62_MOUSE         | PH domain-containing protein OS=Mus musculus OX=10090 GN=Plekhb1 PE=2 SV=1               | MOUSE | 3 |
| 1873 | 5.84 | 5.9  | 13.23 | 10.31 | tr Q3U3M5 Q3U3M5_MOUSE         | Cyclin-K OS=Mus musculus OX=10090 GN=Ccnk PE=1 SV=1                                      | MOUSE | 3 |
| 1874 | 5.82 | 5.89 | 13.82 | 11.64 | sp Q8BFY6 PEF1_MOUSE           | Peflin OS=Mus musculus OX=10090 GN=Pef1 PE=1 SV=1                                        | MOUSE | 3 |
| 1875 | 5.81 | 5.95 | 7.85  | 3.57  | sp Q9Z0W3 NU160_MOUSE          | Nuclear pore complex protein Nup160 OS=Mus musculus OX=10090 GN=Nup160 PE=1 SV=2         | MOUSE | 3 |
| 1876 | 5.8  | 5.88 | 13.32 | 8.03  | sp Q91YL3 UCKL1_MOUSE          | Uridine-cytidine kinase-like 1 OS=Mus musculus OX=10090 GN=Uckl1 PE=1 SV=1               | MOUSE | 3 |

|      |      |      |       |       |                                |                                                                                                  |       |   |
|------|------|------|-------|-------|--------------------------------|--------------------------------------------------------------------------------------------------|-------|---|
| 1877 | 5.79 | 9.83 | 31.45 | 22.58 | tr Q3UW32 Q3UW32_MOUSE         | LRRcap domain-containing protein (Fragment) OS=Mus musculus OX=10090 GN=Anp32b PE=2 SV=1         | MOUSE | 6 |
| 1878 | 5.78 | 6.01 | 16.01 | 9.80  | sp Q9DC50 OCTC_MOUSE           | Peroxisomal carnitine O-octanoyltransferase OS=Mus musculus OX=10090 GN=Crot PE=1 SV=1           | MOUSE | 4 |
| 1879 | 5.78 | 5.88 | 34.45 | 28.57 | tr Q5BLK2 Q5BLK2_MOUSE         | 40S ribosomal protein S20 OS=Mus musculus OX=10090 GN=Rps20 PE=1 SV=1                            | MOUSE | 4 |
| 1880 | 5.78 | 5.87 | 19.57 | 12.04 | tr Q3UL54 Q3UL54_MOUSE         | Uncharacterized protein OS=Mus musculus OX=10090 GN=Rsl1d1 PE=2 SV=1                             | MOUSE | 3 |
| 1881 | 5.75 | 5.91 | 9.69  | 2.15  | tr A0A1B0GSX7 A0A1B0GSX7_MOUSE | Nuclear pore complex protein Nup96 OS=Mus musculus OX=10090 GN=Nup98 PE=1 SV=1                   | MOUSE | 3 |
| 1882 | 5.75 | 5.89 | 51.15 | 37.40 | tr Q4VAE8 Q4VAE8_MOUSE         | Complex I-B15 (Fragment) OS=Mus musculus OX=10090 GN=Ndufb4 PE=2 SV=1                            | MOUSE | 3 |
| 1883 | 5.75 | 5.83 | 27.13 | 26.60 | tr Q80ZM5 Q80ZM5_MOUSE         | H1 histone family, member X OS=Mus musculus OX=10090 GN=H1f10 PE=1 SV=1                          | MOUSE | 6 |
| 1884 | 5.74 | 6.08 | 8.43  | 4.68  | tr F8VPK5 F8VPK5_MOUSE         | Rho-associated protein kinase OS=Mus musculus OX=10090 GN=Rock2 PE=1 SV=1                        | MOUSE | 5 |
| 1885 | 5.73 | 5.95 | 10.06 | 4.97  | tr G3X8Y3 G3X8Y3_MOUSE         | N-alpha-acetyltransferase 15, NatA auxiliary subunit OS=Mus musculus OX=10090 GN=Naa15 PE=1 SV=1 | MOUSE | 5 |
| 1886 | 5.72 | 7.82 | 36.21 | 26.44 | tr A2RTH4 A2RTH4_MOUSE         | Crystallin, gamma E OS=Mus musculus OX=10090 GN=Cryge PE=2 SV=1                                  | MOUSE | 5 |
| 1887 | 5.72 | 5.88 | 12.04 | 4.95  | tr Q6A0C5 Q6A0C5_MOUSE         | MKIAA0126 protein (Fragment) OS=Mus musculus OX=10090 GN=Ube4a PE=2 SV=1                         | MOUSE | 3 |
| 1888 | 5.72 | 5.88 | 32.45 | 20.06 | sp Q8BTG7-2 NDRG4_MOUSE        | Isoform 2 of Protein NDRG4 OS=Mus musculus OX=10090 GN=Ndr4                                      | MOUSE | 5 |
| 1889 | 5.72 | 5.86 | 8.31  | 3.99  | tr G5E863 G5E863_MOUSE         | Glutamate receptor OS=Mus musculus OX=10090 GN=Gria4 PE=1 SV=1                                   | MOUSE | 3 |
| 1890 | 5.71 | 5.95 | 13.62 | 7.77  | sp Q8BX80 ENASE_MOUSE          | Cytosolic endo-beta-N-acetylglucosaminidase OS=Mus musculus OX=10090 GN=Engase PE=1 SV=1         | MOUSE | 5 |
| 1891 | 5.71 | 5.86 | 20.40 | 13.79 | tr Q3TXY3 Q3TXY3_MOUSE         | Uncharacterized protein OS=Mus musculus OX=10090 GN=Tmem201 PE=2 SV=1                            | MOUSE | 4 |
| 1892 | 5.71 | 5.82 | 37.21 | 30.81 | tr E9Q317 E9Q317_MOUSE         | 18 kDa Sin3-associated polypeptide OS=Mus musculus OX=10090 GN=Sap18 PE=1 SV=1                   | MOUSE | 4 |
| 1893 | 5.71 | 5.77 | 17.69 | 9.13  | tr A0A087WSR7 A0A087WSR7_MOUSE | Arf-GAP domain and FG repeat-containing protein 1 OS=Mus musculus OX=10090 GN=Agfg1 PE=1 SV=1    | MOUSE | 3 |

|      |      |       |       |       |                                |                                                                                                                     |       |   |
|------|------|-------|-------|-------|--------------------------------|---------------------------------------------------------------------------------------------------------------------|-------|---|
| 1894 | 5.7  | 7.97  | 17.42 | 11.69 | sp O70572 NSMA_MOUSE           | Sphingomyelin phosphodiesterase 2 OS=Mus musculus<br>OX=10090 GN=Smpd2 PE=1 SV=1                                    | MOUSE | 5 |
| 1895 | 5.7  | 5.77  | 14.65 | 14.65 | sp Q9JJE4 PAQR4_MOUSE          | Progesterone and adipoQ receptor family member 4 OS=Mus musculus<br>OX=10090 GN=Paqr4 PE=2 SV=1                     | MOUSE | 3 |
| 1896 | 5.69 | 5.83  | 35.78 | 16.51 | tr F6VG18 F6VG18_MOUSE         | Leucine zipper transcription factor-like protein 1 (Fragment) OS=Mus musculus<br>OX=10090 GN=Lztf1 PE=1 SV=1        | MOUSE | 3 |
| 1897 | 5.69 | 5.8   | 25.93 | 16.20 | tr A0A0R4J069 A0A0R4J069_MOUSE | Selenocysteine lyase OS=Mus musculus<br>OX=10090 GN=Scly PE=1 SV=1                                                  | MOUSE | 4 |
| 1898 | 5.68 | 5.86  | 38.92 | 25.75 | tr Q9CWA5 Q9CWA5_MOUSE         | Nucleoside diphosphate kinase (Fragment) OS=Mus musculus<br>OX=10090 GN=Nme3 PE=2 SV=1                              | MOUSE | 4 |
| 1899 | 5.68 | 5.86  | 18.42 | 18.42 | sp Q8VD33 SGTB_MOUSE           | Small glutamine-rich tetratricopeptide repeat-containing protein beta OS=Mus musculus<br>OX=10090 GN=Sgtb PE=1 SV=1 | MOUSE | 4 |
| 1900 | 5.68 | 5.74  | 14.86 | 14.86 | sp Q922B1 MACD1_MOUSE          | ADP-ribose glycohydrolase MACROD1 OS=Mus musculus<br>OX=10090 GN=Macro1 PE=1 SV=2                                   | MOUSE | 3 |
| 1901 | 5.67 | 14.08 | 17.04 | 6.22  | tr E9QNY9 E9QNY9_MOUSE         | CLIP-associating protein 1 OS=Mus musculus<br>OX=10090 GN=Clasp1 PE=1 SV=2                                          | MOUSE | 7 |
| 1902 | 5.66 | 12.64 | 36.06 | 30.29 | tr Q7M6W1 Q7M6W1_MOUSE         | Reticulon OS=Mus musculus<br>OX=10090 GN=Rtn1 PE=1 SV=1                                                             | MOUSE | 7 |
| 1903 | 5.66 | 5.76  | 18.37 | 11.48 | tr Q80UL3 Q80UL3_MOUSE         | Galactokinase 1 OS=Mus musculus<br>OX=10090 GN=Galk1 PE=2 SV=1                                                      | MOUSE | 4 |
| 1904 | 5.66 | 5.72  | 13.42 | 10.74 | sp Q8VD62 CK068_MOUSE          | UPF0696 protein C11orf68 homolog OS=Mus musculus<br>OX=10090 GN=Bles03 PE=1 SV=2                                    | MOUSE | 3 |
| 1905 | 5.65 | 5.72  | 10.54 | 4.82  | tr Q27PY9 Q27PY9_MOUSE         | Na(+)/Ca(2+)-exchange protein 1 OS=Mus musculus<br>OX=10090 GN=Slc8a1 PE=2 SV=1                                     | MOUSE | 3 |
| 1906 | 5.64 | 5.86  | 43.58 | 18.72 | sp Q9DBH5 LMAN2_MOUSE          | Vesicular integral-membrane protein VIP36 OS=Mus musculus<br>OX=10090 GN=Lman2 PE=1 SV=2                            | MOUSE | 4 |
| 1907 | 5.64 | 5.74  | 58.95 | 42.11 | sp P62075 TIM13_MOUSE          | Mitochondrial import inner membrane translocase subunit Tim13 OS=Mus musculus<br>OX=10090 GN=Timm13 PE=1 SV=1       | MOUSE | 3 |
| 1908 | 5.64 | 5.72  | 46.49 | 35.96 | tr Q3U9A8 Q3U9A8_MOUSE         | SH3 domain-binding glutamic acid-rich-like protein OS=Mus musculus<br>OX=10090 GN=Sh3bgrl PE=2 SV=1                 | MOUSE | 3 |

|      |      |      |       |       |                        |                                                                                                                      |       |   |
|------|------|------|-------|-------|------------------------|----------------------------------------------------------------------------------------------------------------------|-------|---|
| 1909 | 5.64 | 5.7  | 19.08 | 9.66  | sp Q9Z2E1 MBD2_MOUSE   | Methyl-CpG-binding domain protein 2 OS=Mus musculus<br>OX=10090 GN=Mbd2 PE=2 SV=2                                    | MOUSE | 3 |
| 1910 | 5.63 | 9.03 | 14.53 | 9.54  | sp P98191 CDS1_MOUSE   | Phosphatidate cytidyltransferase 1 OS=Mus musculus<br>OX=10090 GN=Cds1 PE=1 SV=2                                     | MOUSE | 5 |
| 1911 | 5.63 | 5.76 | 21.59 | 21.59 | sp Q6TEK5 VKORL_MOUSE  | Vitamin K epoxide reductase complex subunit 1-like<br>protein 1 OS=Mus musculus OX=10090 GN=Vkorc1l1 PE=1<br>SV=1    | MOUSE | 4 |
| 1912 | 5.63 | 5.69 | 26.70 | 14.44 | tr Q3USC7 Q3USC7_MOUSE | Ganglioside-induced differentiation-associated protein 1-<br>like 1 OS=Mus musculus OX=10090 GN=Gdap1l1 PE=1<br>SV=1 | MOUSE | 3 |
| 1913 | 5.62 | 5.95 | 19.77 | 9.45  | tr E9PW14 E9PW14_MOUSE | Nuclear protein MDM1 OS=Mus musculus OX=10090<br>GN=Mdm1 PE=1 SV=1                                                   | MOUSE | 5 |
| 1914 | 5.61 | 6.23 | 26.73 | 17.49 | tr A2RS58 A2RS58_MOUSE | V-crk sarcoma virus CT10 oncogene homolog (Avian)-like<br>OS=Mus musculus OX=10090 GN=Crkl PE=1 SV=1                 | MOUSE | 5 |
| 1915 | 5.61 | 5.88 | 6.80  | 4.68  | tr E9QKA4 E9QKA4_MOUSE | Serine/arginine repetitive matrix protein 1 OS=Mus<br>musculus OX=10090 GN=Srrm1 PE=1 SV=1                           | MOUSE | 3 |
| 1916 | 5.61 | 5.76 | 27.00 | 13.50 | tr Q8K295 Q8K295_MOUSE | Lrpap1 protein (Fragment) OS=Mus musculus OX=10090<br>GN=Lrpap1 PE=2 SV=1                                            | MOUSE | 4 |
| 1917 | 5.6  | 5.92 | 14.20 | 4.84  | tr Q3U2V0 Q3U2V0_MOUSE | Uncharacterized protein OS=Mus musculus OX=10090<br>GN=Sympk PE=2 SV=1                                               | MOUSE | 5 |
| 1918 | 5.6  | 5.68 | 8.71  | 4.71  | tr B2KFW6 B2KFW6_MOUSE | Polyhomeotic-like 2 (Drosophila) OS=Mus musculus<br>OX=10090 GN=Phc2 PE=4 SV=1                                       | MOUSE | 3 |
| 1919 | 5.59 | 5.64 | 21.10 | 13.31 | tr Q0VGN4 Q0VGN4_MOUSE | Stx16 protein (Fragment) OS=Mus musculus OX=10090<br>GN=Stx16 PE=2 SV=1                                              | MOUSE | 3 |
| 1920 | 5.58 | 9.86 | 49.30 | 27.70 | tr Q0PD14 Q0PD14_MOUSE | Rab39B OS=Mus musculus OX=10090 GN=Rab39b PE=1<br>SV=1                                                               | MOUSE | 5 |
| 1921 | 5.58 | 5.73 | 40.37 | 39.45 | tr Q3UX28 Q3UX28_MOUSE | Mitochondrial pyruvate carrier OS=Mus musculus<br>OX=10090 GN=Mpc1 PE=1 SV=1                                         | MOUSE | 4 |
| 1922 | 5.58 | 5.7  | 24.18 | 23.53 | sp Q9CRB2 NHP2_MOUSE   | H/ACA ribonucleoprotein complex subunit 2 OS=Mus<br>musculus OX=10090 GN=Nhp2 PE=1 SV=1                              | MOUSE | 3 |
| 1923 | 5.57 | 5.82 | 15.80 | 10.92 | sp Q921T2 TOIP1_MOUSE  | Torsin-1A-interacting protein 1 OS=Mus musculus<br>OX=10090 GN=Tor1aip1 PE=1 SV=3                                    | MOUSE | 4 |
| 1924 | 5.57 | 5.8  | 19.72 | 19.72 | sp Q9DBZ5 EIF3K_MOUSE  | Eukaryotic translation initiation factor 3 subunit K OS=Mus<br>musculus OX=10090 GN=Eif3k PE=1 SV=1                  | MOUSE | 4 |

|      |      |       |       |       |                                |                                                                                                     |       |    |
|------|------|-------|-------|-------|--------------------------------|-----------------------------------------------------------------------------------------------------|-------|----|
| 1925 | 5.57 | 5.68  | 17.66 | 12.73 | tr A0A0R4J1H4 A0A0R4J1H4_MOUSE | Nuclear receptor ROR-beta OS=Mus musculus OX=10090 GN=Rorb PE=1 SV=1                                | MOUSE | 5  |
| 1926 | 5.57 | 5.64  | 11.65 | 8.19  | tr A0A0R4J030 A0A0R4J030_MOUSE | APC membrane recruitment protein 2 OS=Mus musculus OX=10090 GN=Amer2 PE=1 SV=1                      | MOUSE | 3  |
| 1927 | 5.56 | 14.61 | 22.79 | 19.51 | tr Q80TN1 Q80TN1_MOUSE         | Calcium/calmodulin-dependent protein kinase (Fragment) OS=Mus musculus OX=10090 GN=Camk2a PE=2 SV=3 | MOUSE | 12 |
| 1928 | 5.52 | 5.66  | 35.69 | 10.29 | sp Q8JZU2 TXTP_MOUSE           | Tricarboxylate transport protein, mitochondrial OS=Mus musculus OX=10090 GN=Slc25a1 PE=1 SV=1       | MOUSE | 3  |
| 1929 | 5.52 | 5.62  | 8.54  | 5.49  | sp Q8R480 NUP85_MOUSE          | Nuclear pore complex protein Nup85 OS=Mus musculus OX=10090 GN=Nup85 PE=1 SV=1                      | MOUSE | 3  |
| 1930 | 5.5  | 5.73  | 12.55 | 3.92  | tr Q80ZX0 Q80ZX0_MOUSE         | Sec24-related gene family, member B (S. cerevisiae) OS=Mus musculus OX=10090 GN=Sec24b PE=1 SV=1    | MOUSE | 3  |
| 1931 | 5.5  | 5.73  | 13.28 | 5.53  | sp Q80SY5 PR38B_MOUSE          | Pre-mRNA-splicing factor 38B OS=Mus musculus OX=10090 GN=Prpf38b PE=1 SV=1                          | MOUSE | 3  |
| 1932 | 5.5  | 5.64  | 6.53  | 2.85  | tr A4FUW1 A4FUW1_MOUSE         | 4932417H02Rik protein (Fragment) OS=Mus musculus OX=10090 GN=Rptor PE=2 SV=1                        | MOUSE | 3  |
| 1933 | 5.49 | 5.65  | 9.89  | 6.89  | sp Q71M36 CSPG5_MOUSE          | Chondroitin sulfate proteoglycan 5 OS=Mus musculus OX=10090 GN=Cspg5 PE=1 SV=2                      | MOUSE | 3  |
| 1934 | 5.49 | 5.56  | 48.21 | 46.43 | sp P62274 RS29_MOUSE           | 40S ribosomal protein S29 OS=Mus musculus OX=10090 GN=Rps29 PE=1 SV=2                               | MOUSE | 3  |
| 1935 | 5.48 | 5.73  | 8.42  | 2.83  | sp Q6PDI5 ECM29_MOUSE          | Proteasome adapter and scaffold protein ECM29 OS=Mus musculus OX=10090 GN=Ecpas PE=1 SV=3           | MOUSE | 3  |
| 1936 | 5.48 | 5.62  | 5.81  | 2.43  | sp Q60520 SIN3A_MOUSE          | Paired amphipathic helix protein Sin3a OS=Mus musculus OX=10090 GN=Sin3a PE=1 SV=3                  | MOUSE | 3  |
| 1937 | 5.47 | 5.62  | 11.89 | 6.06  | tr E9QK48 E9QK48_MOUSE         | Echinoderm microtubule-associated protein-like 2 OS=Mus musculus OX=10090 GN=Eml2 PE=1 SV=1         | MOUSE | 4  |
| 1938 | 5.46 | 7.25  | 21.97 | 8.65  | sp Q3U186 SYRM_MOUSE           | Probable arginine--tRNA ligase, mitochondrial OS=Mus musculus OX=10090 GN=Rars2 PE=1 SV=1           | MOUSE | 4  |
| 1939 | 5.46 | 5.62  | 25.46 | 22.88 | sp Q8VHC5 CABP4_MOUSE          | Calcium-binding protein 4 OS=Mus musculus OX=10090 GN=Cabp4 PE=1 SV=1                               | MOUSE | 4  |
| 1940 | 5.46 | 5.56  | 42.31 | 42.31 | sp Q62048 PEA15_MOUSE          | Astrocytic phosphoprotein PEA-15 OS=Mus musculus OX=10090 GN=Pea15 PE=1 SV=1                        | MOUSE | 4  |



|      |      |       |       |       |                                |                                                                                                  |       |    |
|------|------|-------|-------|-------|--------------------------------|--------------------------------------------------------------------------------------------------|-------|----|
| 1941 | 5.44 | 5.65  | 84.87 | 68.07 | sp Q8R404 MIC13_MOUSE          | MICOS complex subunit MIC13 OS=Mus musculus<br>OX=10090 GN=Micos13 PE=1 SV=1                     | MOUSE | 4  |
| 1942 | 5.44 | 5.54  | 36.59 | 26.83 | sp Q9CQ69 QCR8_MOUSE           | Cytochrome b-c1 complex subunit 8 OS=Mus musculus<br>OX=10090 GN=Uqcrq PE=1 SV=3                 | MOUSE | 3  |
| 1943 | 5.44 | 5.53  | 19.46 | 10.86 | sp Q99PL6 UBXN6_MOUSE          | UBX domain-containing protein 6 OS=Mus musculus<br>OX=10090 GN=Ubxn6 PE=1 SV=1                   | MOUSE | 4  |
| 1944 | 5.43 | 10.62 | 34.66 | 26.71 | sp Q8K354 CBR3_MOUSE           | Carbonyl reductase [NADPH] 3 OS=Mus musculus<br>OX=10090 GN=Cbr3 PE=1 SV=1                       | MOUSE | 6  |
| 1945 | 5.42 | 7.77  | 22.45 | 8.93  | tr Q3TDT0 Q3TDT0_MOUSE         | Tripartite motif-containing protein 3 OS=Mus musculus<br>OX=10090 GN=Trim3 PE=1 SV=1             | MOUSE | 5  |
| 1946 | 5.42 | 5.48  | 17.80 | 17.80 | tr Q3U6D7 Q3U6D7_MOUSE         | MARVEL domain-containing protein OS=Mus musculus<br>OX=10090 GN=Syngr1 PE=2 SV=1                 | MOUSE | 3  |
| 1947 | 5.41 | 5.48  | 58.75 | 58.75 | tr V9GXV0 V9GXV0_MOUSE         | Isocitrate dehydrogenase 3 (NAD+) beta (Fragment)<br>OS=Mus musculus OX=10090 GN=Idh3b PE=1 SV=1 | MOUSE | 5  |
| 1948 | 5.4  | 32.66 | 25.06 | 15.86 | tr A2ALL9 A2ALL9_MOUSE         | Calcium-transporting ATPase OS=Mus musculus OX=10090<br>GN=Atp2b3 PE=1 SV=1                      | MOUSE | 18 |
| 1949 | 5.4  | 5.54  | 14.43 | 5.90  | tr Q921M8 Q921M8_MOUSE         | Ubiquitin carboxyl-terminal hydrolase OS=Mus musculus<br>OX=10090 GN=Usp4 PE=2 SV=1              | MOUSE | 4  |
| 1950 | 5.39 | 5.57  | 26.01 | 9.12  | tr A0A1L1SS90 A0A1L1SS90_MOUSE | N-acyl-L-amino-acid amidohydrolase OS=Mus musculus<br>OX=10090 GN=Acy1 PE=1 SV=1                 | MOUSE | 3  |
| 1951 | 5.38 | 5.57  | 29.91 | 12.39 | sp Q4VAE3 TMM65_MOUSE          | Transmembrane protein 65 OS=Mus musculus OX=10090<br>GN=Tmem65 PE=1 SV=1                         | MOUSE | 3  |
| 1952 | 5.38 | 5.52  | 10.58 | 10.58 | tr Q3V386 Q3V386_MOUSE         | Wiskott-Aldrich syndrome protein family member OS=Mus musculus<br>OX=10090 GN=Wasf3 PE=2 SV=1    | MOUSE | 4  |
| 1953 | 5.38 | 5.44  | 31.61 | 31.61 | tr Q8C1D9 Q8C1D9_MOUSE         | V-type proton ATPase proteolipid subunit OS=Mus musculus<br>OX=10090 GN=Atp6v0c PE=2 SV=1        | MOUSE | 3  |
| 1954 | 5.37 | 5.42  | 26.79 | 26.32 | sp Q9DD18 DTD1_MOUSE           | D-aminoacyl-tRNA deacylase 1 OS=Mus musculus<br>OX=10090 GN=Dtd1 PE=1 SV=2                       | MOUSE | 3  |
| 1955 | 5.36 | 5.84  | 14.84 | 7.98  | sp Q3UHD6 SNX27_MOUSE          | Sorting nexin-27 OS=Mus musculus OX=10090 GN=Snx27<br>PE=1 SV=2                                  | MOUSE | 4  |
| 1956 | 5.36 | 5.45  | 12.28 | 6.57  | tr A1L3S7 A1L3S7_MOUSE         | Gatad2b protein OS=Mus musculus OX=10090<br>GN=Gatad2b PE=1 SV=1                                 | MOUSE | 3  |
| 1957 | 5.35 | 5.44  | 36.05 | 25.00 | tr Q684Q9 Q684Q9_MOUSE         | Ubiquitin-like protein 4A (Fragment) OS=Mus musculus<br>OX=10090 PE=2 SV=1                       | MOUSE | 3  |

|      |      |       |       |       |                                |                                                                                                             |       |    |
|------|------|-------|-------|-------|--------------------------------|-------------------------------------------------------------------------------------------------------------|-------|----|
| 1958 | 5.33 | 7.97  | 41.41 | 33.04 | sp Q8R1V4 TMED4_MOUSE          | Transmembrane emp24 domain-containing protein 4 OS=Mus musculus OX=10090 GN=Tmed4 PE=1 SV=1                 | MOUSE | 7  |
| 1959 | 5.32 | 13.38 | 70.37 | 48.15 | sp Q61411 RASH_MOUSE           | GTPase HRas OS=Mus musculus OX=10090 GN=Hras PE=1 SV=2                                                      | MOUSE | 9  |
| 1960 | 5.32 | 5.56  | 33.33 | 25.37 | sp Q9DB60 PXL2B_MOUSE          | Prostamide/prostaglandin F synthase OS=Mus musculus OX=10090 GN=Prxl2b PE=1 SV=1                            | MOUSE | 5  |
| 1961 | 5.32 | 5.41  | 14.44 | 6.34  | sp Q91XU0-2 WRIP1_MOUSE        | Isoform 2 of ATPase WRNIP1 OS=Mus musculus OX=10090 GN=Wrnip1                                               | MOUSE | 3  |
| 1962 | 5.32 | 5.38  | 14.32 | 10.68 | tr Q6PDD6 Q6PDD6_MOUSE         | Stard10 protein (Fragment) OS=Mus musculus OX=10090 GN=Stard10 PE=2 SV=1                                    | MOUSE | 4  |
| 1963 | 5.31 | 5.46  | 10.60 | 7.60  | tr S4R2L4 S4R2L4_MOUSE         | Arginine/serine-rich coiled-coil protein 2 OS=Mus musculus OX=10090 GN=Rsrc2 PE=1 SV=1                      | MOUSE | 3  |
| 1964 | 5.3  | 5.4   | 14.76 | 10.69 | tr S4R225 S4R225_MOUSE         | WD repeat-containing protein 13 OS=Mus musculus OX=10090 GN=Wdr13 PE=1 SV=1                                 | MOUSE | 3  |
| 1965 | 5.29 | 5.37  | 18.11 | 7.45  | sp Q922D4-4 PP6R3_MOUSE        | Isoform 4 of Serine/threonine-protein phosphatase 6 regulatory subunit 3 OS=Mus musculus OX=10090 GN=Ppp6r3 | MOUSE | 3  |
| 1966 | 5.28 | 16.98 | 51.44 | 46.15 | tr Q3U4W5 Q3U4W5_MOUSE         | Uncharacterized protein OS=Mus musculus OX=10090 GN=Rab6a PE=2 SV=1                                         | MOUSE | 9  |
| 1967 | 5.28 | 7.16  | 18.00 | 7.59  | tr A0A0A6YX71 A0A0A6YX71_MOUSE | Serine/threonine-protein kinase DCLK2 OS=Mus musculus OX=10090 GN=Dclk2 PE=1 SV=1                           | MOUSE | 4  |
| 1968 | 5.28 | 6.97  | 19.44 | 17.24 | tr Q7TMN7 Q7TMN7_MOUSE         | Annexin OS=Mus musculus OX=10090 GN=Anxa4 PE=2 SV=1                                                         | MOUSE | 5  |
| 1969 | 5.27 | 39.51 | 40.72 | 40.27 | tr Q149Z9 Q149Z9_MOUSE         | Histone cluster 1, H1d OS=Mus musculus OX=10090 GN=H1f3 PE=1 SV=1                                           | MOUSE | 36 |
| 1970 | 5.27 | 5.39  | 6.55  | 2.66  | tr Q7TQG5 Q7TQG5_MOUSE         | Neogenin OS=Mus musculus OX=10090 GN=Neo1 PE=1 SV=1                                                         | MOUSE | 3  |
| 1971 | 5.26 | 5.7   | 22.28 | 9.04  | sp Q60902-4 EP15R_MOUSE        | Isoform 4 of Epidermal growth factor receptor substrate 15-like 1 OS=Mus musculus OX=10090 GN=Eps15l1       | MOUSE | 5  |
| 1972 | 5.26 | 5.59  | 17.01 | 12.91 | sp Q56A08 GPKOW_MOUSE          | G-patch domain and KOW motifs-containing protein OS=Mus musculus OX=10090 GN=Gpkow PE=1 SV=2                | MOUSE | 4  |
| 1973 | 5.26 | 5.51  | 12.49 | 6.29  | tr E9Q640 E9Q640_MOUSE         | RNA-binding protein 26 OS=Mus musculus OX=10090 GN=Rbm26 PE=1 SV=1                                          | MOUSE | 5  |

|      |      |      |       |       |                                |                                                                                                                                               |       |   |
|------|------|------|-------|-------|--------------------------------|-----------------------------------------------------------------------------------------------------------------------------------------------|-------|---|
| 1974 | 5.26 | 5.34 | 21.17 | 15.77 | sp Q9DB34 CHM2A_MOUSE          | Charged multivesicular body protein 2a OS=Mus musculus<br>OX=10090 GN=Chmp2a PE=1 SV=1                                                        | MOUSE | 3 |
| 1975 | 5.25 | 5.42 | 9.12  | 2.23  | tr A0A286YCX6 A0A286YCX6_MOUSE | Trafficking protein particle complex 8 OS=Mus musculus<br>OX=10090 GN=Trapp8 PE=1 SV=2                                                        | MOUSE | 3 |
| 1976 | 5.25 | 5.33 | 12.73 | 8.08  | tr Q3UDS7 Q3UDS7_MOUSE         | ADP-dependent glucokinase OS=Mus musculus OX=10090<br>GN=Adpgk PE=1 SV=1                                                                      | MOUSE | 3 |
| 1977 | 5.25 | 5.32 | 52.90 | 34.36 | tr A0A087WPA0 A0A087WPA0_MOUSE | LBH domain-containing 1 OS=Mus musculus OX=10090<br>GN=Lbhd1 PE=4 SV=1                                                                        | MOUSE | 5 |
| 1978 | 5.23 | 5.4  | 17.00 | 6.68  | tr Q3UL32 Q3UL32_MOUSE         | Uncharacterized protein OS=Mus musculus OX=10090<br>GN=Dnajc7 PE=2 SV=1                                                                       | MOUSE | 3 |
| 1979 | 5.23 | 5.36 | 35.47 | 20.35 | sp Q91W29 COX42_MOUSE          | Cytochrome c oxidase subunit 4 isoform 2, mitochondrial<br>OS=Mus musculus OX=10090 GN=Cox4i2 PE=1 SV=1                                       | MOUSE | 3 |
| 1980 | 5.22 | 5.36 | 23.95 | 16.17 | sp Q9CR09 UFC1_MOUSE           | Ubiquitin-fold modifier-conjugating enzyme 1 OS=Mus<br>musculus OX=10090 GN=Ufc1 PE=1 SV=1                                                    | MOUSE | 3 |
| 1981 | 5.21 | 5.34 | 22.32 | 11.61 | sp Q9CX34 SGT1_MOUSE           | Protein SGT1 homolog OS=Mus musculus OX=10090<br>GN=Sugt1 PE=1 SV=3                                                                           | MOUSE | 3 |
| 1982 | 5.2  | 5.72 | 17.12 | 15.56 | tr Q9MD68 Q9MD68_MOUSE         | Cytochrome c oxidase subunit 1 OS=Mus musculus<br>OX=10090 GN=mt-Co1 PE=1 SV=1                                                                | MOUSE | 5 |
| 1983 | 5.2  | 5.33 | 28.23 | 9.57  | tr A0A0R4J0I1 A0A0R4J0I1_MOUSE | Serine protease inhibitor A3K OS=Mus musculus OX=10090<br>GN=Serpina3k PE=1 SV=1                                                              | MOUSE | 3 |
| 1984 | 5.19 | 5.38 | 13.46 | 8.26  | sp Q9JHU9 INO1_MOUSE           | Inositol-3-phosphate synthase 1 OS=Mus musculus<br>OX=10090 GN=Isyna1 PE=1 SV=1                                                               | MOUSE | 3 |
| 1985 | 5.19 | 5.25 | 13.86 | 8.32  | tr Q4VA41 Q4VA41_MOUSE         | Tubby-like protein OS=Mus musculus OX=10090 GN=Tub<br>PE=2 SV=1                                                                               | MOUSE | 4 |
| 1986 | 5.18 | 5.39 | 14.32 | 12.59 | sp Q8JZX4 SPF45_MOUSE          | Splicing factor 45 OS=Mus musculus OX=10090 GN=Rbm17<br>PE=1 SV=1                                                                             | MOUSE | 4 |
| 1987 | 5.18 | 5.27 | 63.94 | 33.65 | tr Q4FJU3 Q4FJU3_MOUSE         | Crip2 protein OS=Mus musculus OX=10090 GN=Crip2 PE=1<br>SV=1                                                                                  | MOUSE | 3 |
| 1988 | 5.15 | 5.23 | 50.00 | 27.66 | sp Q80X32 CE024_MOUSE          | UPF0461 protein C5orf24 homolog OS=Mus musculus<br>OX=10090 PE=2 SV=1                                                                         | MOUSE | 3 |
| 1989 | 5.15 | 5.22 | 14.87 | 6.03  | tr Q3UPY7 Q3UPY7_MOUSE         | Dolichyl-P-Glc:Glc(2)Man(9)GlcNAc(2)-PP-dolichol alpha-<br>1,2-glucosyltransferase (Fragment) OS=Mus musculus<br>OX=10090 GN=Alg10b PE=2 SV=1 | MOUSE | 3 |

|      |      |       |       |       |                                |                                                                                          |       |    |
|------|------|-------|-------|-------|--------------------------------|------------------------------------------------------------------------------------------|-------|----|
| 1990 | 5.15 | 5.22  | 21.70 | 10.85 | tr A0A0R4J0M1 A0A0R4J0M1_MOUSE | Tubulin-folding cofactor C OS=Mus musculus OX=10090 GN=Tbcc PE=1 SV=1                    | MOUSE | 3  |
| 1991 | 5.15 | 5.21  | 58.30 | 24.38 | sp Q8VI64 HUMMR_MOUSE          | Protein MGARP OS=Mus musculus OX=10090 GN=Mgarp PE=1 SV=1                                | MOUSE | 3  |
| 1992 | 5.13 | 5.22  | 42.31 | 33.65 | tr Q9D6H6 Q9D6H6_MOUSE         | Complex I-B12 OS=Mus musculus OX=10090 GN=Ndufb3 PE=2 SV=1                               | MOUSE | 3  |
| 1993 | 5.13 | 5.21  | 43.41 | 37.98 | tr Q9D881 Q9D881_MOUSE         | Cytochrome c oxidase polypeptide Vb OS=Mus musculus OX=10090 GN=Cox5b-ps PE=1 SV=1       | MOUSE | 4  |
| 1994 | 5.13 | 5.2   | 17.91 | 14.53 | tr A0A0A0MQ70 A0A0A0MQ70_MOUSE | Solute carrier family 25 member 35 OS=Mus musculus OX=10090 GN=Slc25a35 PE=1 SV=1        | MOUSE | 3  |
| 1995 | 5.12 | 5.24  | 20.40 | 16.40 | tr Q8C5F7 Q8C5F7_MOUSE         | Protein kinase domain-containing protein OS=Mus musculus OX=10090 PE=2 SV=1              | MOUSE | 3  |
| 1996 | 5.09 | 17.73 | 23.55 | 16.99 | sp P68404 KPCB_MOUSE           | Protein kinase C beta type OS=Mus musculus OX=10090 GN=Prkcb PE=1 SV=4                   | MOUSE | 11 |
| 1997 | 5.09 | 5.2   | 15.02 | 7.23  | tr Q0VDM6 Q0VDM6_MOUSE         | Folh1 protein OS=Mus musculus OX=10090 GN=Folh1 PE=1 SV=1                                | MOUSE | 3  |
| 1998 | 5.09 | 5.15  | 37.40 | 37.40 | tr A0A087WPM0 A0A087WPM0_MOUSE | Selenoprotein H OS=Mus musculus OX=10090 GN=Selenoh PE=1 SV=1                            | MOUSE | 5  |
| 1999 | 5.09 | 5.14  | 27.62 | 27.62 | sp Q8R2Y8 PTH2_MOUSE           | Peptidyl-tRNA hydrolase 2, mitochondrial OS=Mus musculus OX=10090 GN=Pth2 PE=1 SV=1      | MOUSE | 3  |
| 2000 | 5.08 | 5.17  | 17.34 | 15.17 | sp Q8VDK1 NIT1_MOUSE           | Deaminated glutathione amidase OS=Mus musculus OX=10090 GN=Nit1 PE=1 SV=2                | MOUSE | 3  |
| 2001 | 5.07 | 5.53  | 49.72 | 31.07 | tr Q4G0C5 Q4G0C5_MOUSE         | Peptidyl-prolyl cis-trans isomerase OS=Mus musculus OX=10090 GN=Ppih PE=1 SV=1           | MOUSE | 4  |
| 2002 | 5.07 | 5.23  | 20.11 | 7.31  | tr F8WHL1 F8WHL1_MOUSE         | Solute carrier family 30 member 9 OS=Mus musculus OX=10090 GN=Slc30a9 PE=1 SV=1          | MOUSE | 3  |
| 2003 | 5.06 | 10.18 | 51.30 | 32.64 | sp P62748 HPCL1_MOUSE          | Hippocalcin-like protein 1 OS=Mus musculus OX=10090 GN=Hpcal1 PE=1 SV=2                  | MOUSE | 7  |
| 2004 | 5.05 | 5.15  | 28.57 | 19.78 | tr A0A1W2P7J9 A0A1W2P7J9_MOUSE | Glutathione S-transferase theta-2 (Fragment) OS=Mus musculus OX=10090 GN=Gstt2 PE=1 SV=1 | MOUSE | 3  |
| 2005 | 5.04 | 5.23  | 9.44  | 5.98  | sp A2AR02 PPIG_MOUSE           | Peptidyl-prolyl cis-trans isomerase G OS=Mus musculus OX=10090 GN=Ppig PE=1 SV=1         | MOUSE | 4  |

|      |      |       |       |       |                                |                                                                                                     |       |    |
|------|------|-------|-------|-------|--------------------------------|-----------------------------------------------------------------------------------------------------|-------|----|
| 2006 | 5.03 | 5.15  | 36.00 | 8.00  | tr A2ADR8 A2ADR8_MOUSE         | Nuclear inhibitor of protein phosphatase 1 OS=Mus musculus OX=10090 GN=Ppp1r8 PE=1 SV=1             | MOUSE | 2  |
| 2007 | 5.03 | 5.09  | 43.28 | 43.28 | tr Q7JCZ0 Q7JCZ0_MOUSE         | ATP synthase protein 8 OS=Mus musculus OX=10090 GN=mt-Atp8 PE=1 SV=1                                | MOUSE | 3  |
| 2008 | 5.02 | 21.67 | 85.07 | 64.18 | tr Q0PD66 Q0PD66_MOUSE         | Rab1B OS=Mus musculus OX=10090 GN=Rab1b PE=1 SV=1                                                   | MOUSE | 11 |
| 2009 | 5.02 | 5.1   | 81.63 | 57.14 | sp Q62426 CYTB_MOUSE           | Cystatin-B OS=Mus musculus OX=10090 GN=Cstb PE=1 SV=1                                               | MOUSE | 3  |
| 2010 | 5.02 | 5.08  | 21.67 | 21.67 | sp P08030 APT_MOUSE            | Adenine phosphoribosyltransferase OS=Mus musculus OX=10090 GN=Aprt PE=1 SV=2                        | MOUSE | 3  |
| 2011 | 5.01 | 5.16  | 15.66 | 9.25  | sp Q8C729 F126B_MOUSE          | Protein FAM126B OS=Mus musculus OX=10090 GN=Fam126b PE=1 SV=1                                       | MOUSE | 3  |
| 2012 | 4.99 | 41.86 | 28.54 | 22.78 | tr Q3TCR7 Q3TCR7_MOUSE         | Dynamin GTPase OS=Mus musculus OX=10090 GN=Dnm2 PE=1 SV=1                                           | MOUSE | 29 |
| 2013 | 4.99 | 5.18  | 43.15 | 33.56 | sp P61327 MGN_MOUSE            | Protein mago nashi homolog OS=Mus musculus OX=10090 GN=Magoh PE=2 SV=1                              | MOUSE | 4  |
| 2014 | 4.99 | 5.05  | 4.51  | 3.42  | tr E9QM77 E9QM77_MOUSE         | Ataxin-2 OS=Mus musculus OX=10090 GN=Atxn2 PE=1 SV=1                                                | MOUSE | 3  |
| 2015 | 4.98 | 18.25 | 69.44 | 64.44 | sp P84084 ARF5_MOUSE           | ADP-ribosylation factor 5 OS=Mus musculus OX=10090 GN=Arf5 PE=1 SV=2                                | MOUSE | 11 |
| 2016 | 4.98 | 5.04  | 23.40 | 19.50 | tr A0A1L1SSF8 A0A1L1SSF8_MOUSE | RIKEN cDNA 4931406C07 gene OS=Mus musculus OX=10090 GN=4931406C07Rik PE=1 SV=1                      | MOUSE | 3  |
| 2017 | 4.97 | 5.16  | 57.62 | 52.32 | tr Q3TKM9 Q3TKM9_MOUSE         | Actin-related protein 2/3 complex subunit 5 OS=Mus musculus OX=10090 GN=Arpc5 PE=2 SV=1             | MOUSE | 4  |
| 2018 | 4.97 | 5.13  | 14.52 | 11.98 | tr Q3UGC5 Q3UGC5_MOUSE         | Uncharacterized protein OS=Mus musculus OX=10090 GN=Bd2l13 PE=2 SV=1                                | MOUSE | 3  |
| 2019 | 4.96 | 5.12  | 20.96 | 13.49 | tr Q8C3V7 Q8C3V7_MOUSE         | Ferrochelatase OS=Mus musculus OX=10090 GN=Fech PE=2 SV=1                                           | MOUSE | 3  |
| 2020 | 4.96 | 5.04  | 7.57  | 2.45  | tr E9QKE4 E9QKE4_MOUSE         | Rab3 GTPase-activating protein non-catalytic subunit OS=Mus musculus OX=10090 GN=Rab3gap2 PE=1 SV=1 | MOUSE | 3  |
| 2021 | 4.95 | 5.02  | 79.59 | 42.86 | tr A0A0N4SVQ1 A0A0N4SVQ1_MOUSE | Cytochrome c oxidase subunit NDUF44 OS=Mus musculus OX=10090 GN=Ndufa4 PE=1 SV=1                    | MOUSE | 4  |
| 2022 | 4.94 | 5.17  | 5.33  | 1.53  | sp P70206 PLXA1_MOUSE          | Plexin-A1 OS=Mus musculus OX=10090 GN=Plxna1 PE=1 SV=1                                              | MOUSE | 3  |

|      |      |      |       |       |                        |                                                                                            |       |   |
|------|------|------|-------|-------|------------------------|--------------------------------------------------------------------------------------------|-------|---|
| 2023 | 4.93 | 5.13 | 14.29 | 4.86  | tr V9GXJ1 V9GXJ1_MOUSE | Predicted gene, 28036 OS=Mus musculus OX=10090 GN=Gm28036 PE=4 SV=1                        | MOUSE | 3 |
| 2024 | 4.93 | 4.99 | 30.81 | 30.81 | tr Q6P5I1 Q6P5I1_MOUSE | Stromal cell derived factor 2 OS=Mus musculus OX=10090 GN=Sdf2 PE=2 SV=2                   | MOUSE | 4 |
| 2025 | 4.91 | 5.11 | 20.43 | 12.13 | sp Q3UJU9 RMD3_MOUSE   | Regulator of microtubule dynamics protein 3 OS=Mus musculus OX=10090 GN=Rmdn3 PE=1 SV=2    | MOUSE | 4 |
| 2026 | 4.9  | 5.06 | 9.72  | 5.69  | sp Q7TMC8 FCSK_MOUSE   | L-fucose kinase OS=Mus musculus OX=10090 GN=Fcsk PE=1 SV=1                                 | MOUSE | 3 |
| 2027 | 4.9  | 4.96 | 29.55 | 29.55 | tr Q5NDA4 Q5NDA4_MOUSE | Fatty acid binding protein 7, brain OS=Mus musculus OX=10090 GN=Fabp7 PE=2 SV=1            | MOUSE | 3 |
| 2028 | 4.88 | 7.1  | 19.36 | 9.79  | tr Q80XD3 Q80XD3_MOUSE | Regulator of G-protein-signaling 7 OS=Mus musculus OX=10090 GN=Rgs7 PE=1 SV=1              | MOUSE | 4 |
| 2029 | 4.88 | 5.49 | 18.65 | 10.88 | sp Q80WJ7 LYRIC_MOUSE  | Protein LYRIC OS=Mus musculus OX=10090 GN=Mtdh PE=1 SV=1                                   | MOUSE | 5 |
| 2030 | 4.88 | 5.04 | 44.56 | 27.98 | tr Q4FJX4 Q4FJX4_MOUSE | Csrp1 protein OS=Mus musculus OX=10090 GN=Csrp1 PE=1 SV=1                                  | MOUSE | 3 |
| 2031 | 4.88 | 4.97 | 18.31 | 10.12 | tr Q4FJR4 Q4FJR4_MOUSE | Protein-serine/threonine kinase OS=Mus musculus OX=10090 GN=Pdk3 PE=1 SV=1                 | MOUSE | 3 |
| 2032 | 4.87 | 4.93 | 32.95 | 28.98 | tr Q3UMQ2 Q3UMQ2_MOUSE | Down-regulator of transcription 1 OS=Mus musculus OX=10090 GN=Dr1 PE=2 SV=1                | MOUSE | 3 |
| 2033 | 4.86 | 5.73 | 14.75 | 8.81  | tr G5E8N7 G5E8N7_MOUSE | Bifunctional polynucleotide phosphatase/kinase OS=Mus musculus OX=10090 GN=Pnkp PE=1 SV=1  | MOUSE | 4 |
| 2034 | 4.86 | 5    | 33.01 | 11.65 | sp Q8VD72 TTC8_MOUSE   | Tetratricopeptide repeat protein 8 OS=Mus musculus OX=10090 GN=Ttc8 PE=1 SV=1              | MOUSE | 3 |
| 2035 | 4.86 | 5    | 15.38 | 7.31  | tr Q542S9 Q542S9_MOUSE | Syntrophin, basic 2 OS=Mus musculus OX=10090 GN=Sntb2 PE=1 SV=1                            | MOUSE | 3 |
| 2036 | 4.86 | 4.92 | 5.61  | 3.79  | tr F8VPN4 F8VPN4_MOUSE | 4-alpha-glucanotransferase OS=Mus musculus OX=10090 GN=Agl PE=1 SV=1                       | MOUSE | 3 |
| 2037 | 4.85 | 6.06 | 37.67 | 33.56 | sp P12787 COX5A_MOUSE  | Cytochrome c oxidase subunit 5A, mitochondrial OS=Mus musculus OX=10090 GN=Cox5a PE=1 SV=2 | MOUSE | 6 |
| 2038 | 4.85 | 4.95 | 10.69 | 2.43  | sp Q6NZL0 SOGA3_MOUSE  | Protein SOGA3 OS=Mus musculus OX=10090 GN=Soga3 PE=1 SV=2                                  | MOUSE | 2 |
| 2039 | 4.85 | 4.94 | 13.95 | 13.95 | sp Q9D832 DNJB4_MOUSE  | DnaJ homolog subfamily B member 4 OS=Mus musculus OX=10090 GN=Dnajb4 PE=1 SV=1             | MOUSE | 4 |

|      |      |       |       |       |                         |                                                                                                   |       |    |
|------|------|-------|-------|-------|-------------------------|---------------------------------------------------------------------------------------------------|-------|----|
| 2040 | 4.84 | 5.07  | 28.06 | 28.06 | tr D3Z442 D3Z442_MOUSE  | Mth938 domain-containing protein OS=Mus musculus<br>OX=10090 GN=Aamdc PE=1 SV=1                   | MOUSE | 3  |
| 2041 | 4.84 | 4.91  | 7.24  | 3.44  | sp B2RXC1 TPC11_MOUSE   | Trafficking protein particle complex subunit 11 OS=Mus musculus<br>OX=10090 GN=Trappc11 PE=1 SV=1 | MOUSE | 3  |
| 2042 | 4.83 | 6.96  | 25.58 | 22.26 | tr Q3UZN6 Q3UZN6_MOUSE  | Phosducin domain-containing protein OS=Mus musculus<br>OX=10090 GN=Pdd PE=2 SV=1                  | MOUSE | 4  |
| 2043 | 4.83 | 4.89  | 8.76  | 8.76  | tr Q920W8 Q920W8_MOUSE  | 40S ribosomal protein S30 (Fragment) OS=Mus musculus<br>OX=10090 GN=fau PE=3 SV=1                 | MOUSE | 4  |
| 2044 | 4.82 | 98.42 | 68.28 | 62.98 | sp P39053 DYN1_MOUSE    | Dynamin-1 OS=Mus musculus OX=10090 GN=Dnm1 PE=1<br>SV=2                                           | MOUSE | 60 |
| 2045 | 4.82 | 4.97  | 10.94 | 6.57  | tr Q543P6 Q543P6_MOUSE  | Uncharacterized protein OS=Mus musculus OX=10090<br>GN=Acot11 PE=1 SV=1                           | MOUSE | 3  |
| 2046 | 4.82 | 4.93  | 25.42 | 8.02  | sp Q9R0H0-2 ACOX1_MOUSE | Isoform 2 of Peroxisomal acyl-coenzyme A oxidase 1<br>OS=Mus musculus OX=10090 GN=Acox1           | MOUSE | 3  |
| 2047 | 4.82 | 4.88  | 34.88 | 34.88 | tr Q5EAT0 Q5EAT0_MOUSE  | Signal recognition particle 9 kDa protein OS=Mus musculus<br>OX=10090 GN=Srp9 PE=1 SV=1           | MOUSE | 3  |
| 2048 | 4.81 | 5.1   | 28.16 | 11.71 | tr Q8BIV6 Q8BIV6_MOUSE  | Aldo_ket_red domain-containing protein OS=Mus musculus<br>OX=10090 GN=Akr1b10 PE=2 SV=1           | MOUSE | 3  |
| 2049 | 4.81 | 5.07  | 58.79 | 30.77 | sp P09528 FRIH_MOUSE    | Ferritin heavy chain OS=Mus musculus OX=10090<br>GN=Fth1 PE=1 SV=2                                | MOUSE | 4  |
| 2050 | 4.78 | 4.95  | 6.28  | 1.80  | tr F8WIE5 F8WIE5_MOUSE  | HECT-type E3 ubiquitin transferase OS=Mus musculus<br>OX=10090 GN=Hectd1 PE=1 SV=1                | MOUSE | 3  |
| 2051 | 4.78 | 4.86  | 10.43 | 6.59  | tr Q3UME9 Q3UME9_MOUSE  | Uncharacterized protein OS=Mus musculus OX=10090<br>GN=Mogs PE=2 SV=1                             | MOUSE | 3  |
| 2052 | 4.78 | 4.84  | 25.18 | 14.39 | tr Q3UKQ5 Q3UKQ5_MOUSE  | Uncharacterized protein OS=Mus musculus OX=10090<br>GN=M6pr PE=1 SV=1                             | MOUSE | 4  |
| 2053 | 4.77 | 7.45  | 11.18 | 6.36  | tr B1AQ77 B1AQ77_MOUSE  | Keratin, type I cytoskeletal 15 OS=Mus musculus OX=10090<br>GN=Krt15 PE=1 SV=1                    | MOUSE | 5  |
| 2054 | 4.76 | 4.95  | 7.72  | 6.61  | tr Q3V3N5 Q3V3N5_MOUSE  | Nucleolar GTP-binding protein 2 (Fragment) OS=Mus musculus<br>OX=10090 GN=Gnl2 PE=2 SV=1          | MOUSE | 3  |
| 2055 | 4.76 | 4.94  | 9.64  | 4.04  | tr B9EKP8 B9EKP8_MOUSE  | Sorbin and SH3 domain-containing protein 2 OS=Mus musculus<br>OX=10090 GN=Sorbs2 PE=1 SV=1        | MOUSE | 3  |
| 2056 | 4.75 | 5     | 7.30  | 2.94  | sp P54763 EPHB2_MOUSE   | Ephrin type-B receptor 2 OS=Mus musculus OX=10090<br>GN=Ephb2 PE=1 SV=3                           | MOUSE | 3  |

|      |      |      |       |       |                        |                                                                                                                   |       |   |
|------|------|------|-------|-------|------------------------|-------------------------------------------------------------------------------------------------------------------|-------|---|
| 2057 | 4.74 | 5    | 7.41  | 5.04  | tr B2RRY4 B2RRY4_MOUSE | MAGUK p55 subfamily member 5 OS=Mus musculus<br>OX=10090 GN=Mpp5 PE=1 SV=1                                        | MOUSE | 3 |
| 2058 | 4.74 | 4.87 | 29.07 | 20.93 | tr A2A4K0 A2A4K0_MOUSE | ESCRT-II complex subunit VPS25 OS=Mus musculus<br>OX=10090 GN=Vps25 PE=1 SV=1                                     | MOUSE | 3 |
| 2059 | 4.73 | 5.09 | 20.71 | 14.05 | tr Q3TZT4 Q3TZT4_MOUSE | Inositol-polyphosphate 5-phosphatase OS=Mus musculus<br>OX=10090 GN=Inpp5a PE=1 SV=1                              | MOUSE | 5 |
| 2060 | 4.73 | 5.04 | 19.46 | 11.08 | sp Q9JL35 HMG5_MOUSE   | High mobility group nucleosome-binding domain-containing protein 5 OS=Mus musculus OX=10090<br>GN=Hmgn5 PE=1 SV=2 | MOUSE | 3 |
| 2061 | 4.73 | 4.92 | 30.38 | 11.54 | tr Q3UIB5 Q3UIB5_MOUSE | Uncharacterized protein OS=Mus musculus OX=10090<br>GN=Dhrs4 PE=2 SV=1                                            | MOUSE | 3 |
| 2062 | 4.73 | 4.79 | 31.13 | 31.13 | tr Q5M9P1 Q5M9P1_MOUSE | Ribosomal protein L36A OS=Mus musculus OX=10090<br>GN=Rpl36a PE=1 SV=1                                            | MOUSE | 4 |
| 2063 | 4.72 | 4.96 | 20.41 | 7.91  | sp Q8R0F6 ILKAP_MOUSE  | Integrin-linked kinase-associated serine/threonine phosphatase 2C OS=Mus musculus OX=10090 GN=Ilkap<br>PE=1 SV=1  | MOUSE | 4 |
| 2064 | 4.7  | 4.9  | 25.44 | 14.98 | sp Q9QZD8 DIC_MOUSE    | Mitochondrial dicarboxylate carrier OS=Mus musculus<br>OX=10090 GN=Slc25a10 PE=1 SV=2                             | MOUSE | 3 |
| 2065 | 4.7  | 4.8  | 25.21 | 25.21 | sp Q9D1K2 VATF_MOUSE   | V-type proton ATPase subunit F OS=Mus musculus<br>OX=10090 GN=Atp6v1f PE=1 SV=2                                   | MOUSE | 3 |
| 2066 | 4.65 | 4.97 | 17.06 | 6.92  | tr Q3TTV6 Q3TTV6_MOUSE | Tuftelin-interacting protein 11 OS=Mus musculus OX=10090<br>GN=Tfip11 PE=1 SV=1                                   | MOUSE | 4 |
| 2067 | 4.65 | 4.72 | 26.11 | 11.67 | tr Q3U9K9 Q3U9K9_MOUSE | Trafficking protein particle complex subunit OS=Mus musculus OX=10090 GN=Trappc3 PE=1 SV=1                        | MOUSE | 2 |
| 2068 | 4.64 | 5.44 | 10.79 | 3.09  | tr Q5DTM9 Q5DTM9_MOUSE | MKIAA4112 protein (Fragment) OS=Mus musculus<br>OX=10090 GN=Ppfia2 PE=2 SV=1                                      | MOUSE | 3 |
| 2069 | 4.64 | 4.72 | 20.04 | 3.93  | sp Q3TFD2 PCAT1_MOUSE  | Lysophosphatidylcholine acyltransferase 1 OS=Mus musculus OX=10090 GN=Lpcat1 PE=1 SV=1                            | MOUSE | 2 |
| 2070 | 4.64 | 4.71 | 30.25 | 19.14 | tr Q8R0H0 Q8R0H0_MOUSE | DNA-directed RNA polymerase II subunit E OS=Mus musculus OX=10090 GN=Polr2e PE=2 SV=1                             | MOUSE | 2 |
| 2071 | 4.64 | 4.7  | 17.52 | 8.76  | sp Q6Q783 KMT5C_MOUSE  | Histone-lysine N-methyltransferase KMT5C OS=Mus musculus OX=10090 GN=Kmt5c PE=1 SV=1                              | MOUSE | 3 |
| 2072 | 4.63 | 4.91 | 15.60 | 12.82 | sp Q7TNR6 IGS21_MOUSE  | Immunoglobulin superfamily member 21 OS=Mus musculus OX=10090 GN=Igsf21 PE=1 SV=1                                 | MOUSE | 4 |



|      |      |      |       |       |                        |                                                                                                         |       |   |
|------|------|------|-------|-------|------------------------|---------------------------------------------------------------------------------------------------------|-------|---|
| 2073 | 4.63 | 4.67 | 13.04 | 9.57  | tr Q9D3J1 Q9D3J1_MOUSE | Peptidyl-prolyl cis-trans isomerase OS=Mus musculus<br>OX=10090 GN=Ppil4 PE=2 SV=1                      | MOUSE | 3 |
| 2074 | 4.61 | 6.8  | 35.21 | 16.55 | tr E9Q6X0 E9Q6X0_MOUSE | Microtubule-associated protein RP/EB family member 2<br>OS=Mus musculus OX=10090 GN=Mapre2 PE=1 SV=1    | MOUSE | 3 |
| 2075 | 4.61 | 4.85 | 7.50  | 4.07  | tr A2AQA7 A2AQA7_MOUSE | RNA helicase aquarius OS=Mus musculus OX=10090<br>GN=Aqr PE=1 SV=1                                      | MOUSE | 3 |
| 2076 | 4.61 | 4.75 | 6.10  | 6.10  | tr Q3U409 Q3U409_MOUSE | Uncharacterized protein OS=Mus musculus OX=10090<br>GN=Ablim2 PE=2 SV=1                                 | MOUSE | 3 |
| 2077 | 4.61 | 4.7  | 46.34 | 46.34 | tr Q5M9N6 Q5M9N6_MOUSE | Rpl37a protein OS=Mus musculus OX=10090 GN=Rpl37a<br>PE=2 SV=1                                          | MOUSE | 3 |
| 2078 | 4.6  | 4.79 | 12.55 | 6.79  | sp Q3U0L2 AN33B_MOUSE  | Ankyrin repeat domain-containing protein 33B OS=Mus<br>musculus OX=10090 GN=Ankrd33b PE=1 SV=1          | MOUSE | 3 |
| 2079 | 4.6  | 4.78 | 17.00 | 12.39 | tr A3KGR9 A3KGR9_MOUSE | Histocompatibility 13 (Fragment) OS=Mus musculus<br>OX=10090 GN=H13 PE=1 SV=1                           | MOUSE | 3 |
| 2080 | 4.6  | 4.75 | 19.71 | 10.29 | tr Q1XID4 Q1XID4_MOUSE | ATPase H(+)-transporting lysosomal accessory protein 2<br>OS=Mus musculus OX=10090 GN=Atp6ap2 PE=1 SV=2 | MOUSE | 3 |
| 2081 | 4.59 | 5.74 | 16.39 | 6.30  | sp Q9CYT6 CAP2_MOUSE   | Adenylyl cyclase-associated protein 2 OS=Mus musculus<br>OX=10090 GN=Cap2 PE=1 SV=1                     | MOUSE | 3 |
| 2082 | 4.58 | 4.81 | 19.82 | 13.36 | tr Q3TK95 Q3TK95_MOUSE | Uncharacterized protein OS=Mus musculus OX=10090<br>GN=Eif4e PE=1 SV=1                                  | MOUSE | 3 |
| 2083 | 4.58 | 4.63 | 37.14 | 23.27 | tr Q545K4 Q545K4_MOUSE | Eukaryotic translation initiation factor 6 OS=Mus musculus<br>OX=10090 GN=Eif6 PE=1 SV=1                | MOUSE | 3 |
| 2084 | 4.57 | 4.86 | 28.93 | 12.58 | sp O55240 RDH5_MOUSE   | Retinol dehydrogenase 5 OS=Mus musculus OX=10090<br>GN=Rdh5 PE=1 SV=1                                   | MOUSE | 3 |
| 2085 | 4.57 | 4.71 | 34.97 | 29.45 | tr Q5M9J2 Q5M9J2_MOUSE | Histidine triad nucleotide binding protein 2 OS=Mus<br>musculus OX=10090 GN=Hint2 PE=1 SV=1             | MOUSE | 3 |
| 2086 | 4.57 | 4.69 | 21.31 | 16.80 | tr Q5U452 Q5U452_MOUSE | Non-specific serine/threonine protein kinase OS=Mus<br>musculus OX=10090 GN=Trp53rka PE=1 SV=1          | MOUSE | 3 |
| 2087 | 4.57 | 4.68 | 9.89  | 6.06  | tr A7MD55 A7MD55_MOUSE | Grm6 protein (Fragment) OS=Mus musculus OX=10090<br>GN=Grm6 PE=2 SV=1                                   | MOUSE | 3 |
| 2088 | 4.56 | 4.75 | 22.44 | 16.34 | sp E9Q4P1 WDFY1_MOUSE  | WD repeat and FYVE domain-containing protein 1<br>OS=Mus musculus OX=10090 GN=Wdfy1 PE=1 SV=1           | MOUSE | 4 |
| 2089 | 4.56 | 4.6  | 11.82 | 10.68 | sp Q91VZ6 SMAP1_MOUSE  | Stromal membrane-associated protein 1 OS=Mus musculus<br>OX=10090 GN=Smapi1 PE=1 SV=1                   | MOUSE | 3 |

|      |      |      |       |       |                                |                                                                                                                                            |       |   |
|------|------|------|-------|-------|--------------------------------|--------------------------------------------------------------------------------------------------------------------------------------------|-------|---|
| 2090 | 4.55 | 4.65 | 17.54 | 11.69 | sp Q8R4R6 NUP35_MOUSE          | Nucleoporin NUP35 OS=Mus musculus OX=10090 GN=Nup35 PE=1 SV=2                                                                              | MOUSE | 3 |
| 2091 | 4.54 | 4.58 | 23.05 | 11.08 | tr Q543Z5 Q543Z5_MOUSE         | Protein kinase domain-containing protein OS=Mus musculus OX=10090 GN=Map2k6 PE=1 SV=1                                                      | MOUSE | 3 |
| 2092 | 4.53 | 4.72 | 34.60 | 8.89  | tr Q3TUF3 Q3TUF3_MOUSE         | Calumenin OS=Mus musculus OX=10090 GN=Calu PE=1 SV=1                                                                                       | MOUSE | 2 |
| 2093 | 4.53 | 4.65 | 30.84 | 23.36 | tr Q3U6L3 Q3U6L3_MOUSE         | Uncharacterized protein OS=Mus musculus OX=10090 GN=GlrX PE=1 SV=1                                                                         | MOUSE | 3 |
| 2094 | 4.53 | 4.64 | 14.33 | 14.04 | tr D3Z383 D3Z383_MOUSE         | Mesoderm-specific transcript protein OS=Mus musculus OX=10090 GN=Mest PE=1 SV=2                                                            | MOUSE | 3 |
| 2095 | 4.53 | 4.58 | 40.23 | 24.71 | sp Q9D1M4 MCA3_MOUSE           | Eukaryotic translation elongation factor 1 epsilon-1 OS=Mus musculus OX=10090 GN=Eef1e1 PE=1 SV=1                                          | MOUSE | 4 |
| 2096 | 4.51 | 4.56 | 26.29 | 20.00 | tr Q52L78 Q52L78_MOUSE         | Alpha(B)-crystallin OS=Mus musculus OX=10090 GN=Cryab PE=1 SV=1                                                                            | MOUSE | 3 |
| 2097 | 4.51 | 4.55 | 62.50 | 62.50 | sp Q9CQ52 NOP10_MOUSE          | H/ACA ribonucleoprotein complex subunit 3 OS=Mus musculus OX=10090 GN=Nop10 PE=3 SV=1                                                      | MOUSE | 3 |
| 2098 | 4.5  | 4.64 | 9.88  | 3.77  | tr Q3UYK8 Q3UYK8_MOUSE         | Rab3 GTPase-activating protein catalytic subunit OS=Mus musculus OX=10090 GN=Rab3gap1 PE=2 SV=1                                            | MOUSE | 3 |
| 2099 | 4.5  | 4.64 | 9.05  | 4.03  | sp Q4VBE4 EGFLA_MOUSE          | Pikachurin OS=Mus musculus OX=10090 GN=Egflam PE=1 SV=1                                                                                    | MOUSE | 3 |
| 2100 | 4.5  | 4.53 | 17.94 | 17.56 | tr A0A498WFS2 A0A498WFS2_MOUSE | UBX domain-containing protein 1 OS=Mus musculus OX=10090 GN=Ubxn1 PE=1 SV=1                                                                | MOUSE | 3 |
| 2101 | 4.49 | 4.67 | 15.46 | 7.57  | tr Q3UE06 Q3UE06_MOUSE         | Uncharacterized protein OS=Mus musculus OX=10090 GN=Nploc4 PE=2 SV=1                                                                       | MOUSE | 4 |
| 2102 | 4.49 | 4.65 | 15.46 | 8.83  | sp Q99ME9 GTPB4_MOUSE          | GTP-binding protein 4 OS=Mus musculus OX=10090 GN=Gtpbp4 PE=1 SV=3                                                                         | MOUSE | 4 |
| 2103 | 4.47 | 4.77 | 24.42 | 24.42 | tr Q9ESU1 Q9ESU1_MOUSE         | SWI/SNF-related matrix-associated actin-dependent regulator of chromatin subfamily B member 1 OS=Mus musculus OX=10090 GN=Smarb1 PE=2 SV=1 | MOUSE | 5 |
| 2104 | 4.46 | 4.7  | 17.85 | 13.03 | tr Q3UXG7 Q3UXG7_MOUSE         | GDP-fucose protein O-fucosyltransferase 1 OS=Mus musculus OX=10090 GN=Pofut1 PE=1 SV=1                                                     | MOUSE | 3 |
| 2105 | 4.46 | 4.62 | 7.69  | 4.58  | tr Q2M4J2 Q2M4J2_MOUSE         | Phosphoinositide phospholipase C (Fragment) OS=Mus musculus OX=10090 GN=Plcb1 PE=4 SV=1                                                    | MOUSE | 3 |

|      |      |      |       |       |                                |                                                                                               |       |   |
|------|------|------|-------|-------|--------------------------------|-----------------------------------------------------------------------------------------------|-------|---|
| 2106 | 4.44 | 4.49 | 30.73 | 15.14 | tr Q9CZ22 Q9CZ22_MOUSE         | Uncharacterized protein OS=Mus musculus OX=10090 GN=Tpd52l2 PE=2 SV=1                         | MOUSE | 2 |
| 2107 | 4.44 | 4.48 | 20.84 | 9.93  | sp Q8VE47 UBA5_MOUSE           | Ubiquitin-like modifier-activating enzyme 5 OS=Mus musculus OX=10090 GN=Uba5 PE=1 SV=2        | MOUSE | 2 |
| 2108 | 4.42 | 4.59 | 13.62 | 7.59  | tr A0A0R4J098 A0A0R4J098_MOUSE | Zinc finger protein 326 OS=Mus musculus OX=10090 GN=Zfp326 PE=1 SV=1                          | MOUSE | 4 |
| 2109 | 4.42 | 4.57 | 24.24 | 7.74  | tr Q6A0D1 Q6A0D1_MOUSE         | ER membrane protein complex subunit 2 (Fragment) OS=Mus musculus OX=10090 GN=Emc2 PE=1 SV=1   | MOUSE | 2 |
| 2110 | 4.4  | 4.44 | 31.76 | 19.59 | tr A0A0G2JGL0 A0A0G2JGL0_MOUSE | Ubiquitin-conjugating enzyme E2 D3 OS=Mus musculus OX=10090 GN=Ube2d3 PE=1 SV=1               | MOUSE | 5 |
| 2111 | 4.39 | 4.65 | 12.85 | 6.00  | tr Q501L4 Q501L4_MOUSE         | General transcription factor IIIC, polypeptide 4 OS=Mus musculus OX=10090 GN=Gtf3c4 PE=2 SV=1 | MOUSE | 4 |
| 2112 | 4.39 | 4.6  | 3.73  | 3.61  | sp Q3TWI9 CSCL2_MOUSE          | CSC1-like protein 2 OS=Mus musculus OX=10090 GN=Tmem63b PE=1 SV=1                             | MOUSE | 4 |
| 2113 | 4.38 | 8.29 | 30.98 | 13.32 | tr Q3U3C4 Q3U3C4_MOUSE         | Uncharacterized protein OS=Mus musculus OX=10090 GN=Sh3gl1 PE=2 SV=1                          | MOUSE | 4 |
| 2114 | 4.38 | 4.52 | 10.35 | 4.33  | tr Q3UXN3 Q3UXN3_MOUSE         | CysteinyI-tRNA synthetase OS=Mus musculus OX=10090 GN=Cars PE=2 SV=1                          | MOUSE | 3 |
| 2115 | 4.38 | 4.51 | 16.61 | 4.75  | sp Q8BU33 HACL2_MOUSE          | 2-hydroxyacyl-CoA lyase 2 OS=Mus musculus OX=10090 GN=Ilvbl PE=1 SV=1                         | MOUSE | 2 |
| 2116 | 4.36 | 4.49 | 19.28 | 14.35 | tr F7CUP3 F7CUP3_MOUSE         | Amidohydrolase domain-containing protein 2 OS=Mus musculus OX=10090 GN=Amdhd2 PE=1 SV=2       | MOUSE | 3 |
| 2117 | 4.36 | 4.4  | 20.53 | 5.30  | sp Q9QYR9 ACOT2_MOUSE          | Acyl-coenzyme A thioesterase 2, mitochondrial OS=Mus musculus OX=10090 GN=Acot2 PE=1 SV=2     | MOUSE | 2 |
| 2118 | 4.35 | 4.59 | 13.24 | 8.07  | sp Q8R3N6 THOC1_MOUSE          | THO complex subunit 1 OS=Mus musculus OX=10090 GN=Thoc1 PE=1 SV=1                             | MOUSE | 4 |
| 2119 | 4.35 | 4.59 | 25.66 | 12.24 | sp Q8C6E0 CFA36_MOUSE          | Cilia- and flagella-associated protein 36 OS=Mus musculus OX=10090 GN=Cfap36 PE=1 SV=1        | MOUSE | 3 |
| 2120 | 4.35 | 4.47 | 10.62 | 5.81  | sp Q3UHB8 CC177_MOUSE          | Coiled-coil domain-containing protein 177 OS=Mus musculus OX=10090 GN=Ccdc177 PE=1 SV=1       | MOUSE | 3 |
| 2121 | 4.35 | 4.46 | 23.98 | 11.72 | sp P49586 PCY1A_MOUSE          | Choline-phosphate cytidyltransferase A OS=Mus musculus OX=10090 GN=Pcyt1a PE=1 SV=1           | MOUSE | 3 |
| 2122 | 4.33 | 4.53 | 9.09  | 5.20  | sp Q8K2F8 LS14A_MOUSE          | Protein LSM14 homolog A OS=Mus musculus OX=10090 GN=Lsm14a PE=1 SV=1                          | MOUSE | 3 |

|      |      |       |       |       |                        |                                                                                                  |       |    |
|------|------|-------|-------|-------|------------------------|--------------------------------------------------------------------------------------------------|-------|----|
| 2123 | 4.33 | 4.51  | 9.80  | 6.08  | sp Q60770 STXB3_MOUSE  | Syntaxin-binding protein 3 OS=Mus musculus OX=10090 GN=Stxbp3 PE=1 SV=1                          | MOUSE | 3  |
| 2124 | 4.33 | 4.46  | 42.86 | 35.40 | sp Q9CQ22 LTOR1_MOUSE  | Ragulator complex protein LAMTOR1 OS=Mus musculus OX=10090 GN=Lamtor1 PE=1 SV=1                  | MOUSE | 3  |
| 2125 | 4.32 | 4.49  | 11.94 | 5.39  | sp Q80YD1 SUV3_MOUSE   | ATP-dependent RNA helicase SUPV3L1, mitochondrial OS=Mus musculus OX=10090 GN=Supv3l1 PE=1 SV=1  | MOUSE | 3  |
| 2126 | 4.32 | 4.35  | 19.65 | 13.87 | tr Q9DC94 Q9DC94_MOUSE | Signal sequence receptor subunit delta OS=Mus musculus OX=10090 GN=Ssr4 PE=2 SV=1                | MOUSE | 2  |
| 2127 | 4.31 | 11.44 | 47.50 | 47.00 | tr Q9DB24 Q9DB24_MOUSE | Transcription elongation factor A (SII)-like 6 OS=Mus musculus OX=10090 GN=Tceal6 PE=1 SV=1      | MOUSE | 14 |
| 2128 | 4.3  | 4.57  | 15.43 | 10.57 | tr Q8R436 Q8R436_MOUSE | Glutathione synthase (Fragment) OS=Mus musculus OX=10090 PE=3 SV=1                               | MOUSE | 4  |
| 2129 | 4.3  | 4.33  | 10.51 | 5.05  | sp Q8C7K6 PCYXL_MOUSE  | Prenylcysteine oxidase-like OS=Mus musculus OX=10090 GN=Pcyox1l PE=1 SV=1                        | MOUSE | 2  |
| 2130 | 4.29 | 25.38 | 65.38 | 58.46 | tr A2AB79 A2AB79_MOUSE | Histone H2A OS=Mus musculus OX=10090 GN=H2aw PE=2 SV=1                                           | MOUSE | 40 |
| 2131 | 4.29 | 4.77  | 27.71 | 10.19 | sp Q9CRY7 GDPD1_MOUSE  | Lysophospholipase D GDPD1 OS=Mus musculus OX=10090 GN=Gdpd1 PE=1 SV=1                            | MOUSE | 2  |
| 2132 | 4.28 | 4.4   | 34.87 | 24.37 | sp Q8BGT7 SPF30_MOUSE  | Survival of motor neuron-related-splicing factor 30 OS=Mus musculus OX=10090 GN=Smndc1 PE=1 SV=1 | MOUSE | 3  |
| 2133 | 4.27 | 4.41  | 7.53  | 5.73  | sp Q8BH66 ATLA1_MOUSE  | Atlantin-1 OS=Mus musculus OX=10090 GN=Atl1 PE=1 SV=1                                            | MOUSE | 3  |
| 2134 | 4.27 | 4.31  | 20.92 | 8.31  | sp Q05186 RCN1_MOUSE   | Reticulocalbin-1 OS=Mus musculus OX=10090 GN=Rcn1 PE=1 SV=1                                      | MOUSE | 2  |
| 2135 | 4.27 | 4.3   | 12.62 | 1.92  | tr E9Q0N0 E9Q0N0_MOUSE | Intersectin-1 OS=Mus musculus OX=10090 GN=Itsn1 PE=1 SV=1                                        | MOUSE | 2  |
| 2136 | 4.26 | 4.4   | 14.23 | 4.65  | sp Q9WTU0 PHF2_MOUSE   | Lysine-specific demethylase PHF2 OS=Mus musculus OX=10090 GN=Phf2 PE=1 SV=2                      | MOUSE | 3  |
| 2137 | 4.23 | 4.34  | 21.32 | 17.05 | tr Q78P92 Q78P92_MOUSE | FSHD Region Gene 1 protein OS=Mus musculus OX=10090 GN=Frg1 PE=1 SV=1                            | MOUSE | 3  |
| 2138 | 4.22 | 4.71  | 8.45  | 4.01  | tr Q6DI95 Q6DI95_MOUSE | Transportin 3 OS=Mus musculus OX=10090 GN=Tnpo3 PE=2 SV=1                                        | MOUSE | 2  |
| 2139 | 4.22 | 4.45  | 8.44  | 3.01  | sp G5E870 TRIPC_MOUSE  | E3 ubiquitin-protein ligase TRIP12 OS=Mus musculus OX=10090 GN=Trip12 PE=1 SV=1                  | MOUSE | 5  |

|      |      |      |       |       |                                |                                                                                                                |       |   |
|------|------|------|-------|-------|--------------------------------|----------------------------------------------------------------------------------------------------------------|-------|---|
| 2140 | 4.22 | 4.24 | 13.73 | 6.47  | tr A0A286YDN1 A0A286YDN1_MOUSE | Echinoderm microtubule-associated protein-like 3 OS=Mus musculus OX=10090 GN=Eml3 PE=1 SV=1                    | MOUSE | 3 |
| 2141 | 4.22 | 4.24 | 7.90  | 5.09  | tr I3PQW3 I3PQW3_MOUSE         | La ribonucleoprotein domain family member 7 OS=Mus musculus OX=10090 GN=Larp7 PE=3 SV=1                        | MOUSE | 2 |
| 2142 | 4.21 | 4.29 | 6.67  | 4.52  | sp Q99KG3 RBM10_MOUSE          | RNA-binding protein 10 OS=Mus musculus OX=10090 GN=Rbm10 PE=1 SV=1                                             | MOUSE | 3 |
| 2143 | 4.21 | 4.24 | 45.45 | 38.38 | sp Q9DCB1 HMGN3_MOUSE          | High mobility group nucleosome-binding domain-containing protein 3 OS=Mus musculus OX=10090 GN=Hmgn3 PE=1 SV=1 | MOUSE | 2 |
| 2144 | 4.21 | 4.23 | 10.38 | 6.40  | tr Q8C8H5 Q8C8H5_MOUSE         | Uncharacterized protein OS=Mus musculus OX=10090 GN=Gabrg2 PE=2 SV=1                                           | MOUSE | 2 |
| 2145 | 4.18 | 4.74 | 33.62 | 19.66 | sp Q8VDQ1 PTGR2_MOUSE          | Prostaglandin reductase 2 OS=Mus musculus OX=10090 GN=Ptgr2 PE=1 SV=2                                          | MOUSE | 5 |
| 2146 | 4.18 | 4.66 | 16.03 | 5.23  | tr E9QK41 E9QK41_MOUSE         | Actin-binding LIM protein 1 OS=Mus musculus OX=10090 GN=Ablim1 PE=1 SV=1                                       | MOUSE | 3 |
| 2147 | 4.18 | 4.33 | 36.10 | 26.56 | tr Q14C26 Q14C26_MOUSE         | ER membrane protein complex subunit 7 OS=Mus musculus OX=10090 GN=Emc7 PE=1 SV=1                               | MOUSE | 4 |
| 2148 | 4.18 | 4.2  | 6.25  | 3.04  | tr V9GXD9 V9GXD9_MOUSE         | Synergina gamma OS=Mus musculus OX=10090 GN=Synrg PE=1 SV=1                                                    | MOUSE | 2 |
| 2149 | 4.17 | 8.25 | 53.01 | 40.96 | tr Q3UHW9 Q3UHW9_MOUSE         | ADF-H domain-containing protein OS=Mus musculus OX=10090 GN=Cfl2 PE=1 SV=1                                     | MOUSE | 5 |
| 2150 | 4.17 | 4.33 | 21.03 | 13.49 | tr A0A140LJ01 A0A140LJ01_MOUSE | Microsomal signal peptidase 25 kDa subunit (Fragment) OS=Mus musculus OX=10090 GN=Spcs2 PE=1 SV=1              | MOUSE | 3 |
| 2151 | 4.16 | 4.18 | 42.14 | 15.71 | tr Q4VA32 Q4VA32_MOUSE         | Thioesterase superfamily member 2 OS=Mus musculus OX=10090 GN=Acot13 PE=1 SV=1                                 | MOUSE | 2 |
| 2152 | 4.16 | 4.18 | 23.65 | 18.24 | sp Q9JMG1 EDF1_MOUSE           | Endothelial differentiation-related factor 1 OS=Mus musculus OX=10090 GN=Edf1 PE=1 SV=1                        | MOUSE | 2 |
| 2153 | 4.15 | 4.25 | 19.75 | 14.18 | sp Q3TSG4 ALKB5_MOUSE          | RNA demethylase ALKBH5 OS=Mus musculus OX=10090 GN=Alkbh5 PE=1 SV=2                                            | MOUSE | 3 |
| 2154 | 4.15 | 4.25 | 12.59 | 12.59 | tr Q80VX2 Q80VX2_MOUSE         | CD200 antigen OS=Mus musculus OX=10090 GN=Cd200 PE=1 SV=1                                                      | MOUSE | 3 |
| 2155 | 4.15 | 4.16 | 18.77 | 14.08 | sp Q9QX60 DGUOK_MOUSE          | Deoxyguanosine kinase, mitochondrial OS=Mus musculus OX=10090 GN=Dguok PE=1 SV=3                               | MOUSE | 3 |

|      |      |      |       |       |                        |                                                                                                       |       |   |
|------|------|------|-------|-------|------------------------|-------------------------------------------------------------------------------------------------------|-------|---|
| 2156 | 4.14 | 4.49 | 26.76 | 11.71 | tr Q3TXT4 Q3TXT4_MOUSE | Uncharacterized protein OS=Mus musculus OX=10090 GN=Snx5 PE=2 SV=1                                    | MOUSE | 4 |
| 2157 | 4.12 | 8    | 9.46  | 4.77  | sp Q8JZR6 S4A8_MOUSE   | Electroneutral sodium bicarbonate exchanger 1 OS=Mus musculus OX=10090 GN=Slc4a8 PE=2 SV=1            | MOUSE | 4 |
| 2158 | 4.12 | 4.21 | 8.10  | 8.10  | tr Q80X37 Q80X37_MOUSE | CD44 antigen OS=Mus musculus OX=10090 GN=Cd44 PE=1 SV=1                                               | MOUSE | 3 |
| 2159 | 4.11 | 4.26 | 18.97 | 6.42  | tr Q8N9U3 Q8N9U3_MOUSE | Propionate--CoA ligase OS=Mus musculus OX=10090 GN=Acss2 PE=2 SV=1                                    | MOUSE | 2 |
| 2160 | 4.11 | 4.24 | 22.33 | 17.48 | tr Q3U6G1 Q3U6G1_MOUSE | Uncharacterized protein OS=Mus musculus OX=10090 GN=Blvrb PE=1 SV=1                                   | MOUSE | 3 |
| 2161 | 4.1  | 7.24 | 17.99 | 16.81 | sp Q3TWW8 SRSF6_MOUSE  | Serine/arginine-rich splicing factor 6 OS=Mus musculus OX=10090 GN=Srsf6 PE=1 SV=1                    | MOUSE | 6 |
| 2162 | 4.1  | 6.59 | 20.92 | 11.52 | tr Q4FJX1 Q4FJX1_MOUSE | Importin subunit alpha OS=Mus musculus OX=10090 GN=Kpna4 PE=1 SV=1                                    | MOUSE | 3 |
| 2163 | 4.1  | 4.19 | 31.95 | 16.60 | sp Q9WVQ5 MTNB_MOUSE   | Methylthioribulose-1-phosphate dehydratase OS=Mus musculus OX=10090 GN=Apip PE=1 SV=1                 | MOUSE | 2 |
| 2164 | 4.1  | 4.19 | 9.29  | 5.05  | sp Q8K124 PKHO2_MOUSE  | Pleckstrin homology domain-containing family O member 2 OS=Mus musculus OX=10090 GN=Plekho2 PE=1 SV=1 | MOUSE | 2 |
| 2165 | 4.1  | 4.13 | 9.74  | 3.20  | tr Q571J8 Q571J8_MOUSE | Non-specific serine/threonine protein kinase (Fragment) OS=Mus musculus OX=10090 GN=Mark2 PE=2 SV=1   | MOUSE | 2 |
| 2166 | 4.1  | 4.11 | 22.26 | 6.83  | tr Q3UFZ6 Q3UFZ6_MOUSE | Caprin-1_dimer domain-containing protein (Fragment) OS=Mus musculus OX=10090 GN=Caprin1 PE=2 SV=1     | MOUSE | 3 |
| 2167 | 4.1  | 4.11 | 9.18  | 3.94  | sp P21981 TGM2_MOUSE   | Protein-glutamine gamma-glutamyltransferase 2 OS=Mus musculus OX=10090 GN=Tgm2 PE=1 SV=4              | MOUSE | 2 |
| 2168 | 4.09 | 4.1  | 10.71 | 7.14  | sp Q9D387 LAMP5_MOUSE  | Lysosome-associated membrane glycoprotein 5 OS=Mus musculus OX=10090 GN=Lamp5 PE=1 SV=2               | MOUSE | 3 |
| 2169 | 4.08 | 4.27 | 8.53  | 4.26  | tr Q8CCX6 Q8CCX6_MOUSE | Protein VAC14 homolog OS=Mus musculus OX=10090 GN=Vac14 PE=2 SV=1                                     | MOUSE | 2 |
| 2170 | 4.08 | 4.18 | 33.67 | 24.49 | sp Q9CQU3 RER1_MOUSE   | Protein RER1 OS=Mus musculus OX=10090 GN=Rer1 PE=1 SV=1                                               | MOUSE | 3 |
| 2171 | 4.08 | 4.17 | 7.34  | 2.38  | tr A2AKI5 A2AKI5_MOUSE | Integrin alpha-V OS=Mus musculus OX=10090 GN=Itgav PE=1 SV=1                                          | MOUSE | 2 |

|      |      |       |       |       |                        |                                                                                                     |       |    |
|------|------|-------|-------|-------|------------------------|-----------------------------------------------------------------------------------------------------|-------|----|
| 2172 | 4.08 | 4.09  | 15.31 | 10.94 | tr Q8BNF3 Q8BNF3_MOUSE | Uncharacterized protein OS=Mus musculus OX=10090 PE=2 SV=1                                          | MOUSE | 2  |
| 2173 | 4.07 | 4.53  | 16.01 | 11.58 | sp Q6P8X1 SNX6_MOUSE   | Sorting nexin-6 OS=Mus musculus OX=10090 GN=Snx6 PE=1 SV=2                                          | MOUSE | 3  |
| 2174 | 4.07 | 4.45  | 12.35 | 7.53  | tr Q8CII3 Q8CII3_MOUSE | 3-ketodihydrosphingosine reductase OS=Mus musculus OX=10090 GN=Kdsr PE=1 SV=2                       | MOUSE | 3  |
| 2175 | 4.07 | 4.24  | 17.22 | 10.26 | tr Q8BSZ8 Q8BSZ8_MOUSE | PABS domain-containing protein OS=Mus musculus OX=10090 GN=Srm PE=2 SV=1                            | MOUSE | 3  |
| 2176 | 4.07 | 4.09  | 20.26 | 5.19  | sp Q6ZPU9 KBP_MOUSE    | KIF-binding protein OS=Mus musculus OX=10090 GN=Kifbp PE=1 SV=2                                     | MOUSE | 2  |
| 2177 | 4.07 | 4.08  | 21.03 | 16.31 | tr Q9D927 Q9D927_MOUSE | Uncharacterized protein OS=Mus musculus OX=10090 GN=1810009N02Rik PE=2 SV=1                         | MOUSE | 2  |
| 2178 | 4.06 | 8.92  | 26.06 | 21.36 | sp Q99MR0 ACL6B_MOUSE  | Actin-like protein 6B OS=Mus musculus OX=10090 GN=Actl6b PE=1 SV=1                                  | MOUSE | 6  |
| 2179 | 4.06 | 4.07  | 23.93 | 12.82 | sp Q9D1R9 RL34_MOUSE   | 60S ribosomal protein L34 OS=Mus musculus OX=10090 GN=Rpl34 PE=1 SV=2                               | MOUSE | 2  |
| 2180 | 4.05 | 30.58 | 53.35 | 44.85 | sp Q91VM5 RMXL1_MOUSE  | RNA binding motif protein, X-linked-like-1 OS=Mus musculus OX=10090 GN=Rbmxl1 PE=2 SV=1             | MOUSE | 17 |
| 2181 | 4.05 | 4.17  | 17.86 | 6.90  | tr Q3TYV5 Q3TYV5_MOUSE | 2',3'-cyclic-nucleotide 3'-phosphodiesterase OS=Mus musculus OX=10090 GN=Cnp PE=2 SV=1              | MOUSE | 3  |
| 2182 | 4.05 | 4.12  | 22.19 | 7.94  | sp Q9JK48 SHLB1_MOUSE  | Endophilin-B1 OS=Mus musculus OX=10090 GN=Sh3glb1 PE=1 SV=1                                         | MOUSE | 2  |
| 2183 | 4.05 | 4.08  | 19.29 | 10.35 | tr D3YWK1 D3YWK1_MOUSE | WD repeat domain phosphoinositide-interacting protein 2 OS=Mus musculus OX=10090 GN=Wipi2 PE=1 SV=1 | MOUSE | 2  |
| 2184 | 4.05 | 4.06  | 11.53 | 3.17  | sp E9PV24 FIBA_MOUSE   | Fibrinogen alpha chain OS=Mus musculus OX=10090 GN=Fga PE=1 SV=1                                    | MOUSE | 2  |
| 2185 | 4.05 | 4.05  | 24.47 | 10.13 | sp Q9D273 MMAB_MOUSE   | Corrinoid adenosyltransferase OS=Mus musculus OX=10090 GN=Mmab PE=1 SV=1                            | MOUSE | 2  |
| 2186 | 4.04 | 4.44  | 6.37  | 1.31  | tr E9Q0F0 E9Q0F0_MOUSE | Keratin 78 OS=Mus musculus OX=10090 GN=Krt78 PE=1 SV=1                                              | MOUSE | 3  |
| 2187 | 4.04 | 4.15  | 8.52  | 2.60  | tr M1H0B0 M1H0B0_MOUSE | Anoctamin OS=Mus musculus OX=10090 GN=Ano2 PE=2 SV=2                                                | MOUSE | 2  |
| 2188 | 4.04 | 4.05  | 26.05 | 11.49 | tr D3YTR5 D3YTR5_MOUSE | Methyl-CpG-binding domain protein 3 OS=Mus musculus OX=10090 GN=Mbd3 PE=1 SV=1                      | MOUSE | 2  |

|      |      |       |       |       |                        |                                                                                                                     |       |    |
|------|------|-------|-------|-------|------------------------|---------------------------------------------------------------------------------------------------------------------|-------|----|
| 2189 | 4.04 | 4.05  | 39.77 | 27.27 | sp P56135 ATPK_MOUSE   | ATP synthase subunit f, mitochondrial OS=Mus musculus<br>OX=10090 GN=Atp5mf PE=1 SV=3                               | MOUSE | 5  |
| 2190 | 4.04 | 4.05  | 2.85  | 2.28  | tr Q80X98 Q80X98_MOUSE | RNA helicase OS=Mus musculus OX=10090 GN=Dhx38<br>PE=1 SV=1                                                         | MOUSE | 2  |
| 2191 | 4.04 | 4.04  | 27.04 | 17.41 | sp Q9D7I5 LHPP_MOUSE   | Phospholysine phosphohistidine inorganic pyrophosphate<br>phosphatase OS=Mus musculus OX=10090 GN=Lhpp PE=1<br>SV=1 | MOUSE | 2  |
| 2192 | 4.03 | 4.13  | 32.86 | 32.86 | tr Q9EPX9 Q9EPX9_MOUSE | Cystatin C OS=Mus musculus OX=10090 GN=Cst3 PE=2<br>SV=1                                                            | MOUSE | 3  |
| 2193 | 4.03 | 4.05  | 7.45  | 4.41  | tr Q69ZS5 Q69ZS5_MOUSE | MKIAA1065 protein (Fragment) OS=Mus musculus<br>OX=10090 GN=Epn2 PE=2 SV=1                                          | MOUSE | 2  |
| 2194 | 4.03 | 4.03  | 26.85 | 18.52 | sp Q9D2R6 COA3_MOUSE   | Cytochrome c oxidase assembly factor 3 homolog,<br>mitochondrial OS=Mus musculus OX=10090 GN=Coa3 PE=1<br>SV=1      | MOUSE | 2  |
| 2195 | 4.02 | 20.24 | 61.90 | 44.44 | sp Q64524 H2B2E_MOUSE  | Histone H2B type 2-E OS=Mus musculus OX=10090<br>GN=H2bc21 PE=1 SV=3                                                | MOUSE | 52 |
| 2196 | 4.02 | 4.11  | 14.52 | 10.89 | sp Q91WT4 DJC17_MOUSE  | DnaJ homolog subfamily C member 17 OS=Mus musculus<br>OX=10090 GN=Dnajc17 PE=1 SV=2                                 | MOUSE | 2  |
| 2197 | 4.02 | 4.02  | 9.73  | 5.35  | tr S4R1K5 S4R1K5_MOUSE | Rho guanine nucleotide exchange factor 9 OS=Mus<br>musculus OX=10090 GN=Arhgef9 PE=1 SV=1                           | MOUSE | 2  |
| 2198 | 4.02 | 4.02  | 27.27 | 20.45 | tr Q9D7P1 Q9D7P1_MOUSE | 40S ribosomal protein S24 OS=Mus musculus OX=10090<br>GN=Rps24 PE=2 SV=1                                            | MOUSE | 2  |
| 2199 | 4.02 | 4.02  | 17.00 | 13.50 | tr Q9D7S5 Q9D7S5_MOUSE | Methyltransferase-like 7A1 OS=Mus musculus OX=10090<br>GN=Mettl7a1 PE=1 SV=1                                        | MOUSE | 2  |
| 2200 | 4.01 | 4.06  | 12.39 | 8.93  | tr Q3UBS3 Q3UBS3_MOUSE | Haptoglobin OS=Mus musculus OX=10090 GN=Hp PE=1<br>SV=1                                                             | MOUSE | 2  |
| 2201 | 4.01 | 4.02  | 17.01 | 10.82 | sp Q9CY97 SSU72_MOUSE  | RNA polymerase II subunit A C-terminal domain<br>phosphatase SSU72 OS=Mus musculus OX=10090<br>GN=Ssu72 PE=1 SV=1   | MOUSE | 2  |
| 2202 | 4.01 | 4.01  | 15.33 | 9.19  | tr Q9DAN5 Q9DAN5_MOUSE | J domain-containing protein OS=Mus musculus OX=10090<br>GN=Dnajb6 PE=2 SV=1                                         | MOUSE | 2  |
| 2203 | 4.01 | 4.01  | 6.86  | 4.29  | tr Q54AJ5 Q54AJ5_MOUSE | Activated leukocyte cell adhesion molecule OS=Mus<br>musculus OX=10090 GN=Alcam PE=1 SV=1                           | MOUSE | 2  |



|      |      |       |       |       |                         |                                                                                                                         |       |     |
|------|------|-------|-------|-------|-------------------------|-------------------------------------------------------------------------------------------------------------------------|-------|-----|
| 2204 | 4.01 | 4.01  | 27.74 | 16.79 | tr D3YVR9 D3YVR9_MOUSE  | RIKEN cDNA 1110004F10 gene OS=Mus musculus<br>OX=10090 GN=1110004F10Rik PE=1 SV=1                                       | MOUSE | 2   |
| 2205 | 4.01 | 4.01  | 12.81 | 8.12  | sp Q3TZX3 S2533_MOUSE   | Solute carrier family 25 member 33 OS=Mus musculus<br>OX=10090 GN=Slc25a33 PE=2 SV=1                                    | MOUSE | 2   |
| 2206 | 4.01 | 4.01  | 50.00 | 20.75 | sp P56375 ACYP2_MOUSE   | Acylphosphatase-2 OS=Mus musculus OX=10090<br>GN=Acyp2 PE=1 SV=2                                                        | MOUSE | 2   |
| 2207 | 4.01 | 4.01  | 20.13 | 18.87 | tr Q569X3 Q569X3_MOUSE  | U1 small nuclear ribonucleoprotein C OS=Mus musculus<br>OX=10090 GN=Snrpc PE=1 SV=1                                     | MOUSE | 2   |
| 2208 | 4    | 92.29 | 81.57 | 81.57 | sp Q7TMM9 TBB2A_MOUSE   | Tubulin beta-2A chain OS=Mus musculus OX=10090<br>GN=Tubb2a PE=1 SV=1                                                   | MOUSE | 128 |
| 2209 | 4    | 14.59 | 69.52 | 60.43 | tr F6XXH9 F6XXH9_MOUSE  | Inosine-5'-monophosphate dehydrogenase 1 (Fragment)<br>OS=Mus musculus OX=10090 GN=Impdh1 PE=1 SV=1                     | MOUSE | 9   |
| 2210 | 4    | 4.14  | 8.25  | 5.01  | sp Q3UHE1-2 PITM3_MOUSE | Isoform 2 of Membrane-associated phosphatidylinositol<br>transfer protein 3 OS=Mus musculus OX=10090<br>GN=Pitpm3       | MOUSE | 3   |
| 2211 | 4    | 4.03  | 15.61 | 10.73 | tr Q4FJW2 Q4FJW2_MOUSE  | Drap1 protein OS=Mus musculus OX=10090 GN=Drap1<br>PE=1 SV=1                                                            | MOUSE | 2   |
| 2212 | 4    | 4.03  | 15.14 | 9.51  | tr Q3U4N2 Q3U4N2_MOUSE  | Protein-S-isoprenylcysteine O-methyltransferase OS=Mus<br>musculus OX=10090 GN=Icmt PE=1 SV=1                           | MOUSE | 2   |
| 2213 | 4    | 4.01  | 38.04 | 31.52 | sp Q9Z239 PLM_MOUSE     | Phospholemman OS=Mus musculus OX=10090 GN=Fxyd1<br>PE=1 SV=1                                                            | MOUSE | 2   |
| 2214 | 4    | 4     | 11.41 | 6.65  | tr Q5FWJ9 Q5FWJ9_MOUSE  | Nucleoporin 62 OS=Mus musculus OX=10090 GN=Nup62<br>PE=1 SV=1                                                           | MOUSE | 2   |
| 2215 | 4    | 4     | 8.50  | 8.28  | tr Q9ME04 Q9ME04_MOUSE  | NADH-ubiquinone oxidoreductase chain 4 OS=Mus<br>musculus OX=10090 GN=ND4 PE=3 SV=1                                     | MOUSE | 2   |
| 2216 | 4    | 4     | 39.06 | 37.50 | tr Q5NCJ9 Q5NCJ9_MOUSE  | Uncharacterized protein OS=Mus musculus OX=10090<br>GN=Uqcr10 PE=1 SV=1                                                 | MOUSE | 2   |
| 2217 | 4    | 4     | 24.14 | 22.99 | tr Q542R6 Q542R6_MOUSE  | Rhodopsin-sensitive cGMP 3',5'-cyclic phosphodiesterase<br>subunit gamma OS=Mus musculus OX=10090 GN=Pde6g<br>PE=2 SV=1 | MOUSE | 3   |
| 2218 | 4    | 4     | 23.23 | 18.71 | sp Q9DB70 FUND1_MOUSE   | FUN14 domain-containing protein 1 OS=Mus musculus<br>OX=10090 GN=Fundc1 PE=1 SV=1                                       | MOUSE | 2   |
| 2219 | 4    | 4     | 16.88 | 16.88 | sp O70591 PFD2_MOUSE    | Prefoldin subunit 2 OS=Mus musculus OX=10090<br>GN=Pfdn2 PE=1 SV=2                                                      | MOUSE | 2   |

|      |      |      |       |       |                        |                                                                                                                 |       |   |
|------|------|------|-------|-------|------------------------|-----------------------------------------------------------------------------------------------------------------|-------|---|
| 2220 | 4    | 4    | 29.31 | 29.31 | tr Q9D6M5 Q9D6M5_MOUSE | Uncharacterized protein OS=Mus musculus OX=10090 GN=Dynlt3 PE=2 SV=1                                            | MOUSE | 2 |
| 2221 | 4    | 4    | 30.30 | 30.30 | tr Q9CV53 Q9CV53_MOUSE | Glycine cleavage system H protein (Fragment) OS=Mus musculus OX=10090 GN=Gcsh PE=2 SV=1                         | MOUSE | 2 |
| 2222 | 4    | 4    | 26.42 | 26.42 | tr Q8C297 Q8C297_MOUSE | Uncharacterized protein OS=Mus musculus OX=10090 GN=Tmem14c PE=2 SV=1                                           | MOUSE | 2 |
| 2223 | 4    | 4    | 6.32  | 6.32  | tr Q8BXX3 Q8BXX3_MOUSE | GPI-anchor transamidase OS=Mus musculus OX=10090 GN=Pigk PE=1 SV=1                                              | MOUSE | 2 |
| 2224 | 4    | 4    | 20.31 | 20.31 | tr Q3V424 Q3V424_MOUSE | Small nuclear ribonucleoprotein G OS=Mus musculus OX=10090 GN=Snrpg PE=2 SV=1                                   | MOUSE | 2 |
| 2225 | 4    | 4    | 22.41 | 22.41 | tr Q3UYI4 Q3UYI4_MOUSE | Cocaine- and amphetamine-regulated transcript protein OS=Mus musculus OX=10090 GN=Cartpt PE=2 SV=1              | MOUSE | 2 |
| 2226 | 4    | 4    | 8.88  | 8.88  | tr Q3TYJ0 Q3TYJ0_MOUSE | Uncharacterized protein OS=Mus musculus OX=10090 GN=Stub1 PE=2 SV=1                                             | MOUSE | 2 |
| 2227 | 4    | 4    | 10.41 | 10.41 | tr B2RWB7 B2RWB7_MOUSE | 9630033F20Rik protein OS=Mus musculus OX=10090 GN=Tigar PE=1 SV=1                                               | MOUSE | 2 |
| 2228 | 4    | 4    | 25.74 | 25.74 | sp Q9CQY6 UQCC2_MOUSE  | Ubiquinol-cytochrome-c reductase complex assembly factor 2 OS=Mus musculus OX=10090 GN=Uqc2 PE=1 SV=1           | MOUSE | 2 |
| 2229 | 4    | 4    | 19.35 | 19.35 | sp Q8K194 SNR27_MOUSE  | U4/U6.U5 small nuclear ribonucleoprotein 27 kDa protein OS=Mus musculus OX=10090 GN=Snrnp27 PE=1 SV=1           | MOUSE | 2 |
| 2230 | 4    | 4    | 16.82 | 16.82 | sp Q8BFQ8 GALD1_MOUSE  | Glutamine amidotransferase-like class 1 domain-containing protein 1 OS=Mus musculus OX=10090 GN=Gatd1 PE=1 SV=1 | MOUSE | 2 |
| 2231 | 4    | 4    | 12.78 | 12.78 | sp C0HK80 ARXS2_MOUSE  | Adipocyte-related X-chromosome expressed sequence 2 OS=Mus musculus OX=10090 GN=Arxes2 PE=1 SV=1                | MOUSE | 2 |
| 2232 | 3.98 | 4.14 | 9.07  | 1.49  | sp Q8BL66 EEA1_MOUSE   | Early endosome antigen 1 OS=Mus musculus OX=10090 GN=Eea1 PE=1 SV=2                                             | MOUSE | 2 |
| 2233 | 3.97 | 4.25 | 17.04 | 6.08  | tr Q8BLF7 Q8BLF7_MOUSE | MFS domain-containing protein OS=Mus musculus OX=10090 GN=Slc2a3 PE=2 SV=1                                      | MOUSE | 3 |
| 2234 | 3.97 | 4.25 | 9.31  | 5.65  | tr Q14DS6 Q14DS6_MOUSE | Leucyl-tRNA synthetase OS=Mus musculus OX=10090 GN=Lars2 PE=2 SV=1                                              | MOUSE | 3 |

|      |      |      |       |       |                                |                                                                                                                |       |   |
|------|------|------|-------|-------|--------------------------------|----------------------------------------------------------------------------------------------------------------|-------|---|
| 2235 | 3.97 | 4.02 | 16.74 | 12.55 | tr E9QLB2 E9QLB2_MOUSE         | Lysophospholipase-like protein 1 OS=Mus musculus<br>OX=10090 GN=Lyplal1 PE=1 SV=1                              | MOUSE | 2 |
| 2236 | 3.96 | 8.06 | 38.03 | 24.41 | tr B2RRN5 B2RRN5_MOUSE         | Ras-related protein Rab-4 OS=Mus musculus OX=10090<br>GN=Rab4a PE=2 SV=1                                       | MOUSE | 4 |
| 2237 | 3.96 | 4.12 | 8.13  | 1.91  | tr B2RXS8 B2RXS8_MOUSE         | Protein-tyrosine-phosphatase OS=Mus musculus OX=10090<br>GN=Ptpnz1 PE=1 SV=1                                   | MOUSE | 2 |
| 2238 | 3.96 | 4.04 | 4.18  | 2.13  | sp Q6DID3 SCAF8_MOUSE          | SR-related and CTD-associated factor 8 OS=Mus musculus<br>OX=10090 GN=Scaf8 PE=1 SV=1                          | MOUSE | 2 |
| 2239 | 3.96 | 4    | 8.21  | 5.53  | sp Q6P5F7 TTYH3_MOUSE          | Protein tweety homolog 3 OS=Mus musculus OX=10090<br>GN=Ttyh3 PE=1 SV=1                                        | MOUSE | 2 |
| 2240 | 3.95 | 4.08 | 11.53 | 6.02  | tr S4R213 S4R213_MOUSE         | Lactamase, beta-like 1 OS=Mus musculus OX=10090<br>GN=Lactb11 PE=4 SV=1                                        | MOUSE | 3 |
| 2241 | 3.95 | 4.04 | 31.33 | 11.39 | tr Q3UZJ3 Q3UZJ3_MOUSE         | General transcription factor TFIIB OS=Mus musculus<br>OX=10090 GN=Gtf2b PE=2 SV=1                              | MOUSE | 2 |
| 2242 | 3.94 | 4.05 | 13.82 | 6.18  | tr Q6PET3 Q6PET3_MOUSE         | Signal peptidase complex catalytic subunit SEC11<br>(Fragment) OS=Mus musculus OX=10090 GN=Sec11a PE=2<br>SV=1 | MOUSE | 2 |
| 2243 | 3.94 | 4.02 | 9.29  | 9.29  | sp Q9JMD0 ZN207_MOUSE          | BUB3-interacting and GLEBS motif-containing protein<br>ZNF207 OS=Mus musculus OX=10090 GN=Znf207 PE=1<br>SV=1  | MOUSE | 3 |
| 2244 | 3.93 | 8.43 | 14.77 | 7.66  | tr A0A2R8VHP3 A0A2R8VHP3_MOUSE | Predicted pseudogene 5478 OS=Mus musculus OX=10090<br>GN=Gm5478 PE=1 SV=1                                      | MOUSE | 7 |
| 2245 | 3.93 | 4.1  | 20.98 | 7.93  | tr Q3TQR3 Q3TQR3_MOUSE         | Eukaryotic translation initiation factor 5 OS=Mus musculus<br>OX=10090 GN=Eif5 PE=1 SV=1                       | MOUSE | 3 |
| 2246 | 3.93 | 4.01 | 15.78 | 7.89  | sp Q99LC2 CSTF1_MOUSE          | Cleavage stimulation factor subunit 1 OS=Mus musculus<br>OX=10090 GN=Cstf1 PE=1 SV=1                           | MOUSE | 2 |
| 2247 | 3.92 | 4.03 | 34.80 | 10.80 | sp P70122 SBDS_MOUSE           | Ribosome maturation protein SBDS OS=Mus musculus<br>OX=10090 GN=Sbds PE=1 SV=4                                 | MOUSE | 2 |
| 2248 | 3.92 | 4    | 22.22 | 15.38 | sp P60521 GBRL2_MOUSE          | Gamma-aminobutyric acid receptor-associated protein-like<br>2 OS=Mus musculus OX=10090 GN=Gabarapl2 PE=1 SV=1  | MOUSE | 2 |
| 2249 | 3.92 | 4    | 10.69 | 10.69 | sp Q9DC33 HM20A_MOUSE          | High mobility group protein 20A OS=Mus musculus<br>OX=10090 GN=Hmg20a PE=1 SV=1                                | MOUSE | 3 |

|      |      |      |       |       |                                |                                                                                                    |       |   |
|------|------|------|-------|-------|--------------------------------|----------------------------------------------------------------------------------------------------|-------|---|
| 2250 | 3.92 | 3.96 | 9.81  | 5.97  | tr Q8BGR3 Q8BGR3_MOUSE         | Calcium/calmodulin-dependent protein kinase IV OS=Mus musculus OX=10090 GN=Camk4 PE=1 SV=1         | MOUSE | 2 |
| 2251 | 3.91 | 4.14 | 8.38  | 3.62  | tr A0A6Q6PUT5 A0A6Q6PUT5_MOUSE | Pre-mRNA-processing factor 40 homolog A (Fragment) OS=Mus musculus OX=10090 GN=Prpf40a PE=1 SV=1   | MOUSE | 3 |
| 2252 | 3.91 | 4.13 | 22.83 | 12.32 | tr Q6PCW8 Q6PCW8_MOUSE         | Ribosomal RNA-processing protein 43 OS=Mus musculus OX=10090 GN=Exosc8 PE=2 SV=1                   | MOUSE | 3 |
| 2253 | 3.91 | 4.01 | 8.22  | 2.36  | sp Q5DTM8 BRE1A_MOUSE          | E3 ubiquitin-protein ligase BRE1A OS=Mus musculus OX=10090 GN=Rnf20 PE=1 SV=2                      | MOUSE | 2 |
| 2254 | 3.9  | 4.09 | 14.25 | 10.98 | sp Q7TN29 SMAP2_MOUSE          | Stromal membrane-associated protein 2 OS=Mus musculus OX=10090 GN=Smap2 PE=1 SV=1                  | MOUSE | 3 |
| 2255 | 3.9  | 3.99 | 15.13 | 10.39 | tr G5E881 G5E881_MOUSE         | Phosphatidate cytidyltransferase, mitochondrial OS=Mus musculus OX=10090 GN=Tamm41 PE=1 SV=1       | MOUSE | 2 |
| 2256 | 3.89 | 4.06 | 12.81 | 7.53  | sp Q8JZM7 CDC73_MOUSE          | Parafibromin OS=Mus musculus OX=10090 GN=Cdc73 PE=1 SV=1                                           | MOUSE | 3 |
| 2257 | 3.89 | 3.96 | 8.47  | 5.58  | tr Q3TDA1 Q3TDA1_MOUSE         | Oxysterol-binding protein OS=Mus musculus OX=10090 GN=Osbp12 PE=2 SV=1                             | MOUSE | 2 |
| 2258 | 3.89 | 3.96 | 11.83 | 11.83 | tr D3Z417 D3Z417_MOUSE         | G/T mismatch-specific thymine DNA glycosylase (Fragment) OS=Mus musculus OX=10090 GN=Tdg PE=1 SV=1 | MOUSE | 2 |
| 2259 | 3.88 | 3.95 | 22.60 | 7.12  | tr Q569V4 Q569V4_MOUSE         | MRG15 protein OS=Mus musculus OX=10090 GN=Morf4l1 PE=2 SV=1                                        | MOUSE | 2 |
| 2260 | 3.87 | 3.97 | 11.70 | 4.41  | tr Q3TAR6 Q3TAR6_MOUSE         | Protein kinase domain-containing protein OS=Mus musculus OX=10090 GN=Vrk3 PE=1 SV=1                | MOUSE | 4 |
| 2261 | 3.86 | 4.01 | 29.89 | 14.02 | tr Q8K106 Q8K106_MOUSE         | Beta-B1 crystallin OS=Mus musculus OX=10090 GN=Crybb1 PE=2 SV=1                                    | MOUSE | 3 |
| 2262 | 3.86 | 3.95 | 7.68  | 2.94  | tr A0A571BG20 A0A571BG20_MOUSE | SRC kinase-signaling inhibitor 1 OS=Mus musculus OX=10090 GN=Srcin1 PE=1 SV=1                      | MOUSE | 2 |
| 2263 | 3.85 | 3.99 | 16.60 | 5.93  | tr A0A0R4J078 A0A0R4J078_MOUSE | UBX domain-containing protein 4 OS=Mus musculus OX=10090 GN=Ubxn4 PE=1 SV=1                        | MOUSE | 2 |
| 2264 | 3.85 | 3.96 | 21.31 | 7.38  | sp Q8VHL1 SETD7_MOUSE          | Histone-lysine N-methyltransferase SETD7 OS=Mus musculus OX=10090 GN=Setd7 PE=1 SV=2               | MOUSE | 2 |
| 2265 | 3.84 | 3.97 | 24.62 | 24.62 | sp Q9CXL3 CG050_MOUSE          | Uncharacterized protein C7orf50 homolog OS=Mus musculus OX=10090 PE=1 SV=3                         | MOUSE | 3 |

|      |      |       |       |       |                                |                                                                                                          |       |    |
|------|------|-------|-------|-------|--------------------------------|----------------------------------------------------------------------------------------------------------|-------|----|
| 2266 | 3.82 | 24.98 | 67.07 | 64.66 | tr Q8CFQ6 Q8CFQ6_MOUSE         | Pcbp3 protein OS=Mus musculus OX=10090 GN=Pcbp3 PE=2 SV=1                                                | MOUSE | 15 |
| 2267 | 3.82 | 4.09  | 8.60  | 1.62  | sp Q61687 ATR_X_MOUSE          | Transcriptional regulator ATRX OS=Mus musculus OX=10090 GN=Atrx PE=1 SV=3                                | MOUSE | 3  |
| 2268 | 3.82 | 4.09  | 16.67 | 7.55  | tr D3Z0V2 D3Z0V2_MOUSE         | Rho guanine nucleotide exchange factor 7 (Fragment) OS=Mus musculus OX=10090 GN=Arhgef7 PE=1 SV=2        | MOUSE | 4  |
| 2269 | 3.82 | 3.94  | 9.63  | 7.11  | sp Q9CZV8 FXL20_MOUSE          | F-box/LRR-repeat protein 20 OS=Mus musculus OX=10090 GN=Fbxl20 PE=1 SV=3                                 | MOUSE | 3  |
| 2270 | 3.82 | 3.91  | 10.30 | 2.75  | tr Q8BJQ7 Q8BJQ7_MOUSE         | Glycine cleavage system P protein OS=Mus musculus OX=10090 GN=Gldc PE=2 SV=1                             | MOUSE | 2  |
| 2271 | 3.82 | 3.88  | 7.36  | 4.45  | tr Q3UNH5 Q3UNH5_MOUSE         | YTH domain-containing protein OS=Mus musculus OX=10090 GN=Ythdf2 PE=2 SV=1                               | MOUSE | 2  |
| 2272 | 3.81 | 4.01  | 17.48 | 12.58 | tr B0QZT2 B0QZT2_MOUSE         | Dehydrogenase/reductase SDR family member 13 OS=Mus musculus OX=10090 GN=Dhrs13 PE=1 SV=1                | MOUSE | 3  |
| 2273 | 3.8  | 4.02  | 42.11 | 42.11 | sp P0DN34 NDUB1_MOUSE          | NADH dehydrogenase [ubiquinone] 1 beta subcomplex subunit 1 OS=Mus musculus OX=10090 GN=Ndufb1 PE=1 SV=1 | MOUSE | 3  |
| 2274 | 3.8  | 3.85  | 22.55 | 22.55 | tr A0A087WNP6 A0A087WNP6_MOUSE | Protein CDV3 OS=Mus musculus OX=10090 GN=Cdv3 PE=1 SV=1                                                  | MOUSE | 2  |
| 2275 | 3.79 | 4.3   | 21.89 | 5.18  | sp Q8BH57 WDR48_MOUSE          | WD repeat-containing protein 48 OS=Mus musculus OX=10090 GN=Wdr48 PE=1 SV=1                              | MOUSE | 3  |
| 2276 | 3.79 | 4.12  | 11.03 | 2.03  | sp Q7TT37 ELP1_MOUSE           | Elongator complex protein 1 OS=Mus musculus OX=10090 GN=Elp1 PE=1 SV=2                                   | MOUSE | 3  |
| 2277 | 3.78 | 3.94  | 20.72 | 17.72 | sp Q9R062 GLYG_MOUSE           | Glycogenin-1 OS=Mus musculus OX=10090 GN=Gyg1 PE=1 SV=3                                                  | MOUSE | 4  |
| 2278 | 3.78 | 3.9   | 19.61 | 19.61 | sp P62071 RRAS2_MOUSE          | Ras-related protein R-Ras2 OS=Mus musculus OX=10090 GN=Rras2 PE=1 SV=1                                   | MOUSE | 3  |
| 2279 | 3.78 | 3.87  | 16.06 | 6.48  | tr Q3TSR1 Q3TSR1_MOUSE         | Vacuolar protein-sorting-associated protein 36 OS=Mus musculus OX=10090 GN=Vps36 PE=1 SV=1               | MOUSE | 2  |
| 2280 | 3.77 | 3.97  | 23.40 | 14.29 | tr B2FDF6 B2FDF6_MOUSE         | Synaptosomal-associated protein 47 OS=Mus musculus OX=10090 GN=Snap47 PE=1 SV=1                          | MOUSE | 3  |
| 2281 | 3.77 | 3.89  | 18.50 | 18.50 | tr Q3V4A0 Q3V4A0_MOUSE         | Calcium load-activated calcium channel (Fragment) OS=Mus musculus OX=10090 GN=Tmco1 PE=2 SV=1            | MOUSE | 3  |

|      |      |      |       |       |                        |                                                                                                          |       |    |
|------|------|------|-------|-------|------------------------|----------------------------------------------------------------------------------------------------------|-------|----|
| 2282 | 3.77 | 3.87 | 39.16 | 16.27 | sp Q9CPT4 MYDGF_MOUSE  | Myeloid-derived growth factor OS=Mus musculus<br>OX=10090 GN=Mydgf PE=1 SV=1                             | MOUSE | 2  |
| 2283 | 3.77 | 3.82 | 6.24  | 6.24  | tr J3QM95 J3QM95_MOUSE | FSD1-like protein OS=Mus musculus OX=10090 GN=Fsd1l<br>PE=1 SV=1                                         | MOUSE | 2  |
| 2284 | 3.76 | 3.88 | 26.34 | 17.94 | sp Q8BIG7 CMTD1_MOUSE  | Catechol O-methyltransferase domain-containing protein 1<br>OS=Mus musculus OX=10090 GN=Comtd1 PE=1 SV=1 | MOUSE | 3  |
| 2285 | 3.75 | 4.03 | 17.46 | 9.76  | tr G3X8U3 G3X8U3_MOUSE | Queuosine salvage protein OS=Mus musculus OX=10090<br>GN=2210016F16Rik PE=1 SV=1                         | MOUSE | 3  |
| 2286 | 3.75 | 3.81 | 4.67  | 1.85  | tr F8VPK0 F8VPK0_MOUSE | Tetratricopeptide repeat domain 37 OS=Mus musculus<br>OX=10090 GN=Ttc37 PE=1 SV=1                        | MOUSE | 2  |
| 2287 | 3.74 | 6.08 | 10.61 | 7.50  | tr B2RTP7 B2RTP7_MOUSE | Krt2 protein OS=Mus musculus OX=10090 GN=Krt2 PE=2<br>SV=1                                               | MOUSE | 4  |
| 2288 | 3.74 | 3.89 | 21.37 | 21.37 | sp Q9Z199 SPT4B_MOUSE  | Transcription elongation factor SPT4-B OS=Mus musculus<br>OX=10090 GN=Supt4h1b PE=2 SV=1                 | MOUSE | 2  |
| 2289 | 3.74 | 3.87 | 14.11 | 6.61  | tr Q6PGG8 Q6PGG8_MOUSE | Tdrkh protein OS=Mus musculus OX=10090 GN=Tdrkh<br>PE=2 SV=1                                             | MOUSE | 3  |
| 2290 | 3.74 | 3.85 | 20.97 | 9.14  | sp Q8BHE3 ATCAY_MOUSE  | Caytaxin OS=Mus musculus OX=10090 GN=Atcay PE=1<br>SV=1                                                  | MOUSE | 3  |
| 2291 | 3.73 | 3.86 | 12.54 | 5.14  | tr A2AEW8 A2AEW8_MOUSE | GRIP1-associated protein 1 OS=Mus musculus OX=10090<br>GN=Gripap1 PE=1 SV=1                              | MOUSE | 3  |
| 2292 | 3.72 | 45.7 | 67.37 | 57.92 | tr E9Q2W9 E9Q2W9_MOUSE | Alpha-actinin-4 (Fragment) OS=Mus musculus OX=10090<br>GN=Actn4 PE=1 SV=1                                | MOUSE | 23 |
| 2293 | 3.72 | 4.04 | 6.66  | 3.26  | sp E9Q5K9 YTDC1_MOUSE  | YTH domain-containing protein 1 OS=Mus musculus<br>OX=10090 GN=Ythdc1 PE=1 SV=2                          | MOUSE | 2  |
| 2294 | 3.72 | 3.83 | 23.85 | 11.72 | tr Q5SVP3 Q5SVP3_MOUSE | PA28 beta subunit OS=Mus musculus OX=10090<br>GN=PSME2b PE=1 SV=1                                        | MOUSE | 2  |
| 2295 | 3.71 | 3.79 | 16.96 | 13.84 | sp Q9ERE7 MESD_MOUSE   | LRP chaperone MESD OS=Mus musculus OX=10090<br>GN=Mesd PE=1 SV=1                                         | MOUSE | 2  |
| 2296 | 3.7  | 3.94 | 50.70 | 13.02 | tr Q9QXC6 Q9QXC6_MOUSE | Beta-A3/A1 crystallin protein OS=Mus musculus OX=10090<br>GN=Cryba1 PE=1 SV=1                            | MOUSE | 2  |
| 2297 | 3.7  | 3.83 | 17.16 | 6.31  | tr G3X8W7 G3X8W7_MOUSE | Cell division cycle protein 23 homolog OS=Mus musculus<br>OX=10090 GN=Cdc23 PE=1 SV=1                    | MOUSE | 3  |
| 2298 | 3.7  | 3.83 | 19.59 | 13.06 | sp Q6ZQI3 MLEC_MOUSE   | Malectin OS=Mus musculus OX=10090 GN=Mlec PE=1 SV=2                                                      | MOUSE | 3  |

|      |      |      |       |       |                        |                                                                                        |       |   |
|------|------|------|-------|-------|------------------------|----------------------------------------------------------------------------------------|-------|---|
| 2299 | 3.7  | 3.81 | 7.86  | 4.49  | tr Q5SUH7 Q5SUH7_MOUSE | Clathrin interactor 1 OS=Mus musculus OX=10090 GN=Clint1 PE=1 SV=1                     | MOUSE | 2 |
| 2300 | 3.69 | 3.76 | 29.38 | 20.90 | tr Q542M2 Q542M2_MOUSE | Coatomer subunit zeta OS=Mus musculus OX=10090 GN=Copz1 PE=1 SV=1                      | MOUSE | 2 |
| 2301 | 3.68 | 5.41 | 47.74 | 33.55 | tr F2Z3Z1 F2Z3Z1_MOUSE | Hippocalcin-like protein 4 (Fragment) OS=Mus musculus OX=10090 GN=Hpcal4 PE=1 SV=1     | MOUSE | 4 |
| 2302 | 3.68 | 3.85 | 12.65 | 2.73  | tr F8VPQ4 F8VPQ4_MOUSE | SLIT-ROBO Rho GTPase-activating protein 3 OS=Mus musculus OX=10090 GN=Srgap3 PE=1 SV=1 | MOUSE | 2 |
| 2303 | 3.68 | 3.78 | 15.44 | 8.42  | tr Q543X5 Q543X5_MOUSE | CCR4-NOT transcription complex subunit 7 OS=Mus musculus OX=10090 GN=Cnot7 PE=1 SV=1   | MOUSE | 2 |
| 2304 | 3.66 | 12   | 44.14 | 44.14 | tr Q4VBX4 Q4VBX4_MOUSE | Ubiquitin-conjugating enzyme E2 variant 2 OS=Mus musculus OX=10090 GN=Ube2v2 PE=2 SV=1 | MOUSE | 6 |
| 2305 | 3.66 | 3.85 | 5.62  | 5.62  | tr G5E811 G5E811_MOUSE | Glycine receptor subunit alpha-3 OS=Mus musculus OX=10090 GN=Glr3 PE=1 SV=1            | MOUSE | 3 |
| 2306 | 3.66 | 3.77 | 23.86 | 7.61  | tr Q54AG5 Q54AG5_MOUSE | Choline/ethanolamine kinase-beta OS=Mus musculus OX=10090 GN=Chkb PE=1 SV=1            | MOUSE | 2 |
| 2307 | 3.66 | 3.76 | 11.56 | 5.28  | sp Q99K70 RRAGC_MOUSE  | Ras-related GTP-binding protein C OS=Mus musculus OX=10090 GN=Rragc PE=1 SV=1          | MOUSE | 2 |
| 2308 | 3.66 | 3.75 | 9.03  | 5.14  | tr Q5BKS5 Q5BKS5_MOUSE | Hook homolog 3 (Drosophila) OS=Mus musculus OX=10090 GN=Hook3 PE=2 SV=1                | MOUSE | 2 |
| 2309 | 3.65 | 3.81 | 13.29 | 10.40 | tr Q69ZP6 Q69ZP6_MOUSE | MKIAA1178 protein (Fragment) OS=Mus musculus OX=10090 GN=Cd2bp2 PE=2 SV=1              | MOUSE | 3 |
| 2310 | 3.65 | 3.78 | 21.00 | 7.21  | tr A7VMV2 A7VMV2_MOUSE | L-gulonate 3-dehydrogenase OS=Mus musculus OX=10090 GN=Cryl1 PE=1 SV=1                 | MOUSE | 2 |
| 2311 | 3.65 | 3.76 | 9.80  | 2.34  | tr B2RY27 B2RY27_MOUSE | Taok3 protein OS=Mus musculus OX=10090 GN=Taok3 PE=2 SV=1                              | MOUSE | 2 |
| 2312 | 3.64 | 3.81 | 16.79 | 7.36  | tr Q3UK41 Q3UK41_MOUSE | HDAG domain-containing protein OS=Mus musculus OX=10090 GN=Nelfa PE=2 SV=1             | MOUSE | 3 |
| 2313 | 3.62 | 3.89 | 20.16 | 9.68  | tr B1AWD9 B1AWD9_MOUSE | Clathrin light chain OS=Mus musculus OX=10090 GN=Clta PE=1 SV=1                        | MOUSE | 3 |
| 2314 | 3.62 | 3.74 | 32.81 | 32.81 | tr Q14A47 Q14A47_MOUSE | Coiled-coil domain-containing protein 72 OS=Mus musculus OX=10090 GN=Tma7 PE=2 SV=1    | MOUSE | 3 |

|      |      |      |       |       |                        |                                                                                                           |       |   |
|------|------|------|-------|-------|------------------------|-----------------------------------------------------------------------------------------------------------|-------|---|
| 2315 | 3.62 | 3.68 | 41.67 | 41.67 | sp Q9CQ91 NDUA3_MOUSE  | NADH dehydrogenase [ubiquinone] 1 alpha subcomplex subunit 3 OS=Mus musculus OX=10090 GN=Ndufa3 PE=1 SV=1 | MOUSE | 2 |
| 2316 | 3.61 | 3.74 | 11.59 | 4.00  | tr G5E8I8 G5E8I8_MOUSE | Calcium homeostasis endoplasmic reticulum protein OS=Mus musculus OX=10090 GN=Cherp PE=1 SV=2             | MOUSE | 3 |
| 2317 | 3.6  | 4.03 | 10.97 | 6.20  | tr Q3TPD1 Q3TPD1_MOUSE | Uncharacterized protein (Fragment) OS=Mus musculus OX=10090 PE=2 SV=1                                     | MOUSE | 3 |
| 2318 | 3.6  | 3.68 | 6.00  | 4.18  | tr B2M0S2 B2M0S2_MOUSE | Secretory carrier-associated membrane protein OS=Mus musculus OX=10090 GN=Gm45927 PE=2 SV=1               | MOUSE | 2 |
| 2319 | 3.6  | 3.68 | 21.14 | 21.14 | sp Q8QZZ7 TPRKB_MOUSE  | EKC/KEOPS complex subunit Tprkb OS=Mus musculus OX=10090 GN=Tprkb PE=1 SV=1                               | MOUSE | 2 |
| 2320 | 3.59 | 3.71 | 33.82 | 19.32 | sp Q80ZW2 THEM6_MOUSE  | Protein THEM6 OS=Mus musculus OX=10090 GN=Them6 PE=1 SV=1                                                 | MOUSE | 3 |
| 2321 | 3.59 | 3.68 | 22.70 | 17.79 | tr Z4YJH1 Z4YJH1_MOUSE | Centrin-2 OS=Mus musculus OX=10090 GN=Cetn2 PE=1 SV=1                                                     | MOUSE | 2 |
| 2322 | 3.59 | 3.66 | 11.39 | 11.39 | sp Q8R2U0 SEH1_MOUSE   | Nucleoporin SEH1 OS=Mus musculus OX=10090 GN=Seh1 PE=2 SV=1                                               | MOUSE | 2 |
| 2323 | 3.58 | 3.78 | 2.28  | 1.61  | tr B2RY88 B2RY88_MOUSE | Eml5 protein OS=Mus musculus OX=10090 GN=Eml5 PE=2 SV=1                                                   | MOUSE | 3 |
| 2324 | 3.58 | 3.76 | 12.82 | 11.22 | sp Q99JY8 PLPP3_MOUSE  | Phospholipid phosphatase 3 OS=Mus musculus OX=10090 GN=Plpp3 PE=1 SV=1                                    | MOUSE | 3 |
| 2325 | 3.56 | 3.85 | 24.03 | 13.81 | sp Q9QXV1 CBX8_MOUSE   | Chromobox protein homolog 8 OS=Mus musculus OX=10090 GN=Cbx8 PE=1 SV=1                                    | MOUSE | 3 |
| 2326 | 3.55 | 3.64 | 14.50 | 14.50 | tr Q3TLW5 Q3TLW5_MOUSE | Aquaporin-1 OS=Mus musculus OX=10090 GN=Aqp1 PE=2 SV=1                                                    | MOUSE | 3 |
| 2327 | 3.55 | 3.63 | 16.60 | 16.60 | sp Q8BXV2 BRI3B_MOUSE  | BRI3-binding protein OS=Mus musculus OX=10090 GN=Bri3bp PE=1 SV=1                                         | MOUSE | 4 |
| 2328 | 3.55 | 3.61 | 8.87  | 4.35  | sp Q8BH24 TM9S4_MOUSE  | Transmembrane 9 superfamily member 4 OS=Mus musculus OX=10090 GN=Tm9sf4 PE=1 SV=1                         | MOUSE | 2 |
| 2329 | 3.54 | 3.8  | 11.46 | 3.96  | tr E9Q616 E9Q616_MOUSE | AHNAK nucleoprotein (desmoyokin) OS=Mus musculus OX=10090 GN=Ahnak PE=1 SV=1                              | MOUSE | 2 |
| 2330 | 3.53 | 3.62 | 26.39 | 11.81 | sp Q6PGH1 BUD31_MOUSE  | Protein BUD31 homolog OS=Mus musculus OX=10090 GN=Bud31 PE=1 SV=2                                         | MOUSE | 2 |



|      |      |      |       |       |                        |                                                                                                                   |       |   |
|------|------|------|-------|-------|------------------------|-------------------------------------------------------------------------------------------------------------------|-------|---|
| 2331 | 3.52 | 5.45 | 15.22 | 5.49  | tr A2A6U3 A2A6U3_MOUSE | Septin-9 OS=Mus musculus OX=10090 GN=Septin9 PE=1 SV=1                                                            | MOUSE | 4 |
| 2332 | 3.52 | 3.59 | 6.11  | 6.11  | tr Q3TIJ0 Q3TIJ0_MOUSE | NOT2_3_5 domain-containing protein OS=Mus musculus OX=10090 GN=Cnot2 PE=2 SV=1                                    | MOUSE | 2 |
| 2333 | 3.51 | 3.59 | 6.39  | 6.39  | tr Q9ESU8 Q9ESU8_MOUSE | Neutral amino acid transporter ASCT1 OS=Mus musculus OX=10090 GN=Slc1a4 PE=2 SV=1                                 | MOUSE | 2 |
| 2334 | 3.5  | 3.61 | 14.91 | 10.55 | tr Q7TPS7 Q7TPS7_MOUSE | Nfyc protein OS=Mus musculus OX=10090 GN=Nfyc PE=2 SV=1                                                           | MOUSE | 3 |
| 2335 | 3.5  | 3.61 | 11.97 | 11.97 | tr Q5U4G4 Q5U4G4_MOUSE | Ppap2c protein (Fragment) OS=Mus musculus OX=10090 GN=Plpp2 PE=2 SV=1                                             | MOUSE | 3 |
| 2336 | 3.5  | 3.58 | 5.59  | 1.66  | tr F8VPL1 F8VPL1_MOUSE | Voltage-dependent calcium channel subunit alpha-2/delta-4 OS=Mus musculus OX=10090 GN=Cacna2d4 PE=3 SV=1          | MOUSE | 2 |
| 2337 | 3.49 | 3.57 | 5.26  | 4.11  | sp Q05D44 IF2P_MOUSE   | Eukaryotic translation initiation factor 5B OS=Mus musculus OX=10090 GN=Eif5b PE=1 SV=2                           | MOUSE | 2 |
| 2338 | 3.48 | 3.78 | 11.92 | 4.83  | sp Q6PAV2 HERC4_MOUSE  | Probable E3 ubiquitin-protein ligase HERC4 OS=Mus musculus OX=10090 GN=Herc4 PE=1 SV=2                            | MOUSE | 4 |
| 2339 | 3.48 | 3.61 | 8.92  | 6.37  | tr Q4FJX5 Q4FJX5_MOUSE | Dhcr7 protein OS=Mus musculus OX=10090 GN=Dhcr7 PE=2 SV=1                                                         | MOUSE | 2 |
| 2340 | 3.47 | 3.65 | 23.24 | 16.22 | sp Q9JKL4 NDUF3_MOUSE  | NADH dehydrogenase [ubiquinone] 1 alpha subcomplex assembly factor 3 OS=Mus musculus OX=10090 GN=Ndufa3 PE=1 SV=1 | MOUSE | 2 |
| 2341 | 3.47 | 3.54 | 27.06 | 13.76 | sp Q8VE95 CH082_MOUSE  | UPF0598 protein C8orf82 homolog OS=Mus musculus OX=10090 PE=1 SV=1                                                | MOUSE | 2 |
| 2342 | 3.47 | 3.54 | 39.39 | 27.27 | tr Q8R472 Q8R472_MOUSE | HIG1 domain family member 1A, mitochondrial OS=Mus musculus OX=10090 GN=Higd1a PE=1 SV=1                          | MOUSE | 2 |
| 2343 | 3.47 | 3.53 | 15.57 | 14.37 | sp Q9D328 NACHO_MOUSE  | Novel acetylcholine receptor chaperone OS=Mus musculus OX=10090 GN=Tmem35a PE=1 SV=1                              | MOUSE | 2 |
| 2344 | 3.46 | 3.57 | 7.49  | 1.81  | tr Q8R320 Q8R320_MOUSE | Nardilysin, N-arginine dibasic convertase, NRD convertase 1 OS=Mus musculus OX=10090 GN=Nrd1 PE=2 SV=1            | MOUSE | 2 |
| 2345 | 3.46 | 3.57 | 19.55 | 9.77  | sp A2ADY9 DDI2_MOUSE   | Protein DDI1 homolog 2 OS=Mus musculus OX=10090 GN=Ddi2 PE=1 SV=1                                                 | MOUSE | 2 |
| 2346 | 3.46 | 3.52 | 8.45  | 5.25  | tr B2RY30 B2RY30_MOUSE | Exosome complex component RRP45 OS=Mus musculus OX=10090 GN=Exosc9 PE=2 SV=1                                      | MOUSE | 2 |

|      |      |      |       |       |                                |                                                                                                                          |       |   |
|------|------|------|-------|-------|--------------------------------|--------------------------------------------------------------------------------------------------------------------------|-------|---|
| 2347 | 3.45 | 3.6  | 21.13 | 16.20 | sp Q9CPQ3 TOM22_MOUSE          | Mitochondrial import receptor subunit TOM22 homolog OS=Mus musculus OX=10090 GN=Tomm22 PE=1 SV=3                         | MOUSE | 2 |
| 2348 | 3.45 | 3.57 | 11.86 | 6.63  | sp P54731 FAF1_MOUSE           | FAS-associated factor 1 OS=Mus musculus OX=10090 GN=Faf1 PE=1 SV=2                                                       | MOUSE | 3 |
| 2349 | 3.45 | 3.56 | 39.53 | 20.00 | tr A0A1Y7VJZ2 A0A1Y7VJZ2_MOUSE | Maleylacetoacetate isomerase OS=Mus musculus OX=10090 GN=Gstz1 PE=1 SV=1                                                 | MOUSE | 3 |
| 2350 | 3.44 | 3.51 | 19.47 | 19.47 | sp P61804 DAD1_MOUSE           | Dolichyl-diphosphooligosaccharide--protein glycosyltransferase subunit DAD1 OS=Mus musculus OX=10090 GN=Dad1 PE=1 SV=3   | MOUSE | 2 |
| 2351 | 3.43 | 3.76 | 5.61  | 1.12  | tr G3X9H5 G3X9H5_MOUSE         | Huntingtin OS=Mus musculus OX=10090 GN=Htt PE=1 SV=1                                                                     | MOUSE | 3 |
| 2352 | 3.43 | 3.69 | 28.36 | 8.21  | tr A0A0R4IZW8 A0A0R4IZW8_MOUSE | Calcium-activated neutral proteinase small subunit OS=Mus musculus OX=10090 GN=Capns1 PE=1 SV=1                          | MOUSE | 3 |
| 2353 | 3.43 | 3.5  | 5.63  | 4.27  | tr Q8BZW3 Q8BZW3_MOUSE         | Beta-galactosidase-1-like protein 2 OS=Mus musculus OX=10090 GN=Glb1l2 PE=1 SV=1                                         | MOUSE | 2 |
| 2354 | 3.42 | 3.48 | 6.96  | 6.96  | tr Q544L9 Q544L9_MOUSE         | Uncharacterized protein OS=Mus musculus OX=10090 GN=Efnb1 PE=1 SV=1                                                      | MOUSE | 2 |
| 2355 | 3.41 | 3.55 | 50.63 | 48.73 | sp Q8R1B5 CPLX3_MOUSE          | Complexin-3 OS=Mus musculus OX=10090 GN=Cplx3 PE=1 SV=1                                                                  | MOUSE | 4 |
| 2356 | 3.4  | 3.51 | 17.31 | 7.31  | tr Q8K0I5 Q8K0I5_MOUSE         | 3-hydroxy-3-methylglutaryl coenzyme A synthase OS=Mus musculus OX=10090 GN=Hmgcs1 PE=2 SV=1                              | MOUSE | 2 |
| 2357 | 3.39 | 3.57 | 15.05 | 4.76  | tr A0A0R4J079 A0A0R4J079_MOUSE | Golgi resident protein GCP60 OS=Mus musculus OX=10090 GN=Acbd3 PE=1 SV=1                                                 | MOUSE | 2 |
| 2358 | 3.39 | 3.51 | 37.13 | 22.16 | sp Q8BHG9 CGBP1_MOUSE          | CGG triplet repeat-binding protein 1 OS=Mus musculus OX=10090 GN=Cggbp1 PE=1 SV=1                                        | MOUSE | 3 |
| 2359 | 3.39 | 3.48 | 11.27 | 3.89  | sp O35405 PLD3_MOUSE           | 5'-3' exonuclease PLD3 OS=Mus musculus OX=10090 GN=Pld3 PE=1 SV=1                                                        | MOUSE | 3 |
| 2360 | 3.39 | 3.47 | 8.92  | 6.02  | tr Q7TND9 Q7TND9_MOUSE         | Dihydrolipoamide acetyltransferase component of pyruvate dehydrogenase complex OS=Mus musculus OX=10090 GN=Dbt PE=2 SV=1 | MOUSE | 2 |
| 2361 | 3.38 | 3.56 | 16.93 | 13.54 | sp Q3UPH1 PRRC1_MOUSE          | Protein PRRC1 OS=Mus musculus OX=10090 GN=Prrc1 PE=1 SV=1                                                                | MOUSE | 3 |
| 2362 | 3.38 | 3.49 | 20.31 | 15.33 | tr Q8BH40 Q8BH40_MOUSE         | Syntaxin-7 OS=Mus musculus OX=10090 GN=Stx7 PE=1 SV=1                                                                    | MOUSE | 3 |

|      |      |       |       |       |                                |                                                                                                          |       |    |
|------|------|-------|-------|-------|--------------------------------|----------------------------------------------------------------------------------------------------------|-------|----|
| 2363 | 3.38 | 3.44  | 29.93 | 23.36 | sp Q9D8S9 BOLA1_MOUSE          | BolA-like protein 1 OS=Mus musculus OX=10090 GN=Bola1 PE=1 SV=1                                          | MOUSE | 2  |
| 2364 | 3.37 | 3.65  | 23.18 | 23.18 | sp Q9D6K8 FUND2_MOUSE          | FUN14 domain-containing protein 2 OS=Mus musculus OX=10090 GN=Fundc2 PE=1 SV=1                           | MOUSE | 3  |
| 2365 | 3.36 | 3.78  | 20.42 | 7.33  | tr E9PWY6 E9PWY6_MOUSE         | 2-amino-3-ketobutyrate coenzyme A ligase, mitochondrial OS=Mus musculus OX=10090 GN=Gcat PE=1 SV=1       | MOUSE | 2  |
| 2366 | 3.36 | 3.58  | 8.66  | 5.02  | tr Q8CDZ5 Q8CDZ5_MOUSE         | Nucleoporin_C domain-containing protein OS=Mus musculus OX=10090 GN=Nup133 PE=2 SV=1                     | MOUSE | 3  |
| 2367 | 3.36 | 3.49  | 20.58 | 6.03  | tr Q544K9 Q544K9_MOUSE         | OMPdecase OS=Mus musculus OX=10090 GN=Umps PE=1 SV=1                                                     | MOUSE | 3  |
| 2368 | 3.36 | 3.49  | 28.10 | 23.14 | sp Q91VR7 MLP3A_MOUSE          | Microtubule-associated proteins 1A/1B light chain 3A OS=Mus musculus OX=10090 GN=Map1lc3a PE=1 SV=1      | MOUSE | 3  |
| 2369 | 3.33 | 3.55  | 18.13 | 9.36  | tr Q8BTD8 Q8BTD8_MOUSE         | Uncharacterized protein (Fragment) OS=Mus musculus OX=10090 GN=Pitpnc1 PE=2 SV=1                         | MOUSE | 3  |
| 2370 | 3.33 | 3.49  | 21.18 | 17.06 | sp Q9CQU0 TXD12_MOUSE          | Thioredoxin domain-containing protein 12 OS=Mus musculus OX=10090 GN=Txndc12 PE=1 SV=1                   | MOUSE | 2  |
| 2371 | 3.33 | 3.45  | 15.16 | 3.12  | tr G3X920 G3X920_MOUSE         | Armadillo repeat-containing protein 8 OS=Mus musculus OX=10090 GN=Armrc8 PE=1 SV=1                       | MOUSE | 2  |
| 2372 | 3.33 | 3.4   | 9.18  | 9.18  | tr Q3UN47 Q3UN47_MOUSE         | Endonuclease OS=Mus musculus OX=10090 GN=Endog PE=1 SV=1                                                 | MOUSE | 2  |
| 2373 | 3.32 | 27.41 | 47.78 | 45.39 | sp Q9Z204-3 HNRPC_MOUSE        | Isoform 3 of Heterogeneous nuclear ribonucleoproteins C1/C2 OS=Mus musculus OX=10090 GN=Hnrnpc           | MOUSE | 14 |
| 2374 | 3.29 | 9.58  | 27.88 | 17.95 | sp Q8VDS4 RPR1A_MOUSE          | Regulation of nuclear pre-mRNA domain-containing protein 1A OS=Mus musculus OX=10090 GN=Rprd1a PE=1 SV=1 | MOUSE | 5  |
| 2375 | 3.29 | 3.51  | 27.72 | 8.42  | tr A0A494B9W4 A0A494B9W4_MOUSE | RNA-binding protein 4B (Fragment) OS=Mus musculus OX=10090 GN=Rbm4b PE=1 SV=1                            | MOUSE | 2  |
| 2376 | 3.28 | 3.48  | 20.00 | 15.27 | tr Q6ZQJ2 Q6ZQJ2_MOUSE         | Methionine aminopeptidase (Fragment) OS=Mus musculus OX=10090 GN=mKIAA0094 PE=3 SV=1                     | MOUSE | 3  |
| 2377 | 3.28 | 3.47  | 7.34  | 3.75  | sp Q8R124 KLH36_MOUSE          | Kelch-like protein 36 OS=Mus musculus OX=10090 GN=Klh36 PE=1 SV=1                                        | MOUSE | 2  |
| 2378 | 3.28 | 3.4   | 24.29 | 21.05 | sp Q9CRD0 OCAD1_MOUSE          | OCIA domain-containing protein 1 OS=Mus musculus OX=10090 GN=Ociad1 PE=1 SV=1                            | MOUSE | 3  |

|      |      |       |       |       |                                |                                                                                                                   |       |   |
|------|------|-------|-------|-------|--------------------------------|-------------------------------------------------------------------------------------------------------------------|-------|---|
| 2379 | 3.27 | 3.34  | 4.58  | 4.58  | tr Q9CZU7 Q9CZU7_MOUSE         | Uncharacterized protein OS=Mus musculus OX=10090 GN=Lamp2 PE=2 SV=1                                               | MOUSE | 2 |
| 2380 | 3.26 | 7.54  | 20.17 | 8.70  | tr Q3ULP9 Q3ULP9_MOUSE         | Uncharacterized protein OS=Mus musculus OX=10090 GN=Fubp3 PE=2 SV=1                                               | MOUSE | 4 |
| 2381 | 3.26 | 3.48  | 13.30 | 6.12  | tr G5E896 G5E896_MOUSE         | Enhancer of mRNA-decapping protein 4 OS=Mus musculus OX=10090 GN=Edc4 PE=1 SV=1                                   | MOUSE | 4 |
| 2382 | 3.26 | 3.39  | 20.23 | 10.69 | sp Q8CFE2 HPF1_MOUSE           | Histone PARylation factor 1 OS=Mus musculus OX=10090 GN=Hpfl PE=1 SV=1                                            | MOUSE | 2 |
| 2383 | 3.26 | 3.37  | 23.46 | 13.99 | tr F6V305 F6V305_MOUSE         | Ubiquinol-cytochrome-c reductase complex assembly factor 1 (Fragment) OS=Mus musculus OX=10090 GN=Uqcc1 PE=1 SV=1 | MOUSE | 3 |
| 2384 | 3.25 | 10.36 | 10.20 | 9.26  | sp Q02257 PLAK_MOUSE           | Junction plakoglobin OS=Mus musculus OX=10090 GN=Jup PE=1 SV=3                                                    | MOUSE | 6 |
| 2385 | 3.25 | 3.41  | 21.66 | 12.10 | sp Q9CPX6 ATG3_MOUSE           | Ubiquitin-like-conjugating enzyme ATG3 OS=Mus musculus OX=10090 GN=Atg3 PE=1 SV=1                                 | MOUSE | 3 |
| 2386 | 3.25 | 3.4   | 7.28  | 5.40  | tr A0A1S6GWG8 A0A1S6GWG8_MOUSE | Uncharacterized protein OS=Mus musculus OX=10090 GN=Dnaja4 PE=2 SV=1                                              | MOUSE | 2 |
| 2387 | 3.25 | 3.36  | 10.79 | 7.42  | sp Q8C8Y5 SAMD7_MOUSE          | Sterile alpha motif domain-containing protein 7 OS=Mus musculus OX=10090 GN=Samd7 PE=2 SV=4                       | MOUSE | 3 |
| 2388 | 3.25 | 3.31  | 31.65 | 31.65 | sp P60603 ROMO1_MOUSE          | Reactive oxygen species modulator 1 OS=Mus musculus OX=10090 GN=Romo1 PE=2 SV=1                                   | MOUSE | 3 |
| 2389 | 3.24 | 3.36  | 14.12 | 4.39  | tr Q8R378 Q8R378_MOUSE         | Leucine-rich repeat protein SHOC-2 OS=Mus musculus OX=10090 GN=Shoc2 PE=2 SV=1                                    | MOUSE | 2 |
| 2390 | 3.23 | 3.44  | 11.11 | 9.47  | sp Q7TSY6 CELF4_MOUSE          | CUGBP Elav-like family member 4 OS=Mus musculus OX=10090 GN=Celf4 PE=1 SV=2                                       | MOUSE | 3 |
| 2391 | 3.23 | 3.33  | 39.19 | 17.57 | sp Q61012 GBG1_MOUSE           | Guanine nucleotide-binding protein G(T) subunit gamma-T1 OS=Mus musculus OX=10090 GN=Gngt1 PE=1 SV=3              | MOUSE | 2 |
| 2392 | 3.23 | 3.29  | 32.35 | 32.35 | sp O08997 ATOX1_MOUSE          | Copper transport protein ATOX1 OS=Mus musculus OX=10090 GN=Atox1 PE=1 SV=1                                        | MOUSE | 2 |
| 2393 | 3.21 | 3.35  | 10.23 | 2.78  | tr Q3UDS1 Q3UDS1_MOUSE         | Uncharacterized protein OS=Mus musculus OX=10090 GN=Cpsf3 PE=2 SV=1                                               | MOUSE | 2 |
| 2394 | 3.18 | 4.23  | 10.23 | 6.86  | tr Q5CCJ9 Q5CCJ9_MOUSE         | Orfx protein OS=Mus musculus OX=10090 GN=Brd3 PE=2 SV=2                                                           | MOUSE | 4 |

|      |      |      |       |       |                        |                                                                                                                  |       |   |
|------|------|------|-------|-------|------------------------|------------------------------------------------------------------------------------------------------------------|-------|---|
| 2395 | 3.18 | 3.37 | 27.41 | 27.41 | tr A8Y5N8 A8Y5N8_MOUSE | Pleckstrin homology domain-containing family F member 2 (Fragment) OS=Mus musculus OX=10090 GN=Plekhf2 PE=1 SV=1 | MOUSE | 4 |
| 2396 | 3.18 | 3.34 | 6.45  | 1.10  | tr F8VQ05 F8VQ05_MOUSE | FRY-like transcription coactivator OS=Mus musculus OX=10090 GN=Fryl PE=1 SV=1                                    | MOUSE | 2 |
| 2397 | 3.18 | 3.24 | 6.13  | 5.92  | sp Q8CHK3 MBOA7_MOUSE  | Lysophospholipid acyltransferase 7 OS=Mus musculus OX=10090 GN=Mboat7 PE=1 SV=1                                  | MOUSE | 2 |
| 2398 | 3.17 | 3.39 | 7.02  | 5.76  | sp P09055 ITB1_MOUSE   | Integrin beta-1 OS=Mus musculus OX=10090 GN=Itgb1 PE=1 SV=1                                                      | MOUSE | 3 |
| 2399 | 3.16 | 3.24 | 15.72 | 7.24  | tr D3Z780 D3Z780_MOUSE | Translation initiation factor eIF-2B subunit delta OS=Mus musculus OX=10090 GN=Eif2b4 PE=1 SV=1                  | MOUSE | 2 |
| 2400 | 3.15 | 3.34 | 16.58 | 7.67  | tr Q540F5 Q540F5_MOUSE | CTP:phosphoethanolamine cytidyltransferase OS=Mus musculus OX=10090 PE=3 SV=1                                    | MOUSE | 3 |
| 2401 | 3.15 | 3.29 | 11.72 | 11.72 | tr G3X926 G3X926_MOUSE | Ribosome production factor 2 homolog OS=Mus musculus OX=10090 GN=Rpf2 PE=1 SV=1                                  | MOUSE | 2 |
| 2402 | 3.15 | 3.28 | 33.60 | 16.00 | sp Q9JHS3 LTOR2_MOUSE  | Ragulator complex protein LAMTOR2 OS=Mus musculus OX=10090 GN=Lamtor2 PE=1 SV=1                                  | MOUSE | 2 |
| 2403 | 3.15 | 3.21 | 22.07 | 14.83 | sp Q8BL95 CF298_MOUSE  | Cilia- and flagella-associated protein 298 OS=Mus musculus OX=10090 GN=Cfap298 PE=1 SV=1                         | MOUSE | 2 |
| 2404 | 3.15 | 3.21 | 19.23 | 14.29 | tr Q3UFD0 Q3UFD0_MOUSE | Cytochrome c oxidase assembly protein COX16 homolog, mitochondrial OS=Mus musculus OX=10090 PE=2 SV=1            | MOUSE | 2 |
| 2405 | 3.14 | 9.28 | 43.03 | 34.55 | tr Q5M9K7 Q5M9K7_MOUSE | Ribosomal protein S10 OS=Mus musculus OX=10090 GN=Rps10 PE=1 SV=1                                                | MOUSE | 5 |
| 2406 | 3.14 | 3.3  | 12.92 | 3.81  | tr Q8C027 Q8C027_MOUSE | Vacuolar protein sorting-associated protein 11 homolog OS=Mus musculus OX=10090 GN=Vps11 PE=2 SV=1               | MOUSE | 2 |
| 2407 | 3.14 | 3.22 | 25.60 | 16.80 | sp P59708 SF3B6_MOUSE  | Splicing factor 3B subunit 6 OS=Mus musculus OX=10090 GN=Sf3b6 PE=1 SV=1                                         | MOUSE | 2 |
| 2408 | 3.13 | 3.23 | 15.22 | 12.73 | tr Q9D6D0 Q9D6D0_MOUSE | Solute carrier family 25, member 27 OS=Mus musculus OX=10090 GN=Slc25a27 PE=1 SV=1                               | MOUSE | 3 |
| 2409 | 3.13 | 3.19 | 4.80  | 4.80  | sp Q9D4C9 CLVS1_MOUSE  | Clavesin-1 OS=Mus musculus OX=10090 GN=Clvs1 PE=1 SV=1                                                           | MOUSE | 2 |
| 2410 | 3.12 | 3.27 | 9.55  | 3.60  | sp Q9Z1K5 ARI1_MOUSE   | E3 ubiquitin-protein ligase ARIH1 OS=Mus musculus OX=10090 GN=Arih1 PE=1 SV=3                                    | MOUSE | 2 |

|      |      |       |       |       |                                |                                                                                                     |       |    |
|------|------|-------|-------|-------|--------------------------------|-----------------------------------------------------------------------------------------------------|-------|----|
| 2411 | 3.11 | 3.35  | 9.42  | 2.64  | tr Q7TQD7 Q7TQD7_MOUSE         | Myo1b protein OS=Mus musculus OX=10090 GN=Myo1b PE=1 SV=1                                           | MOUSE | 2  |
| 2412 | 3.11 | 3.18  | 7.63  | 4.88  | sp Q9JJY3 NSMA2_MOUSE          | Sphingomyelin phosphodiesterase 3 OS=Mus musculus OX=10090 GN=Smpd3 PE=1 SV=1                       | MOUSE | 2  |
| 2413 | 3.1  | 34.9  | 92.06 | 74.60 | sp Q64525 H2B2B_MOUSE          | Histone H2B type 2-B OS=Mus musculus OX=10090 GN=Hist2h2bb PE=1 SV=3                                | MOUSE | 62 |
| 2414 | 3.1  | 3.24  | 5.99  | 3.38  | tr E9QP59 E9QP59_MOUSE         | Inner nuclear membrane protein Man1 OS=Mus musculus OX=10090 GN=Lemd3 PE=1 SV=1                     | MOUSE | 3  |
| 2415 | 3.09 | 3.23  | 11.62 | 6.14  | tr Q4FJN2 Q4FJN2_MOUSE         | Peptidylprolyl isomerase OS=Mus musculus OX=10090 GN=Fkbp5 PE=1 SV=1                                | MOUSE | 3  |
| 2416 | 3.08 | 3.26  | 8.07  | 1.89  | tr A0A1L1SV73 A0A1L1SV73_MOUSE | Ubiquitin carboxyl-terminal hydrolase 47 OS=Mus musculus OX=10090 GN=Usp47 PE=1 SV=1                | MOUSE | 2  |
| 2417 | 3.08 | 3.17  | 16.44 | 10.41 | tr Q9CT17 Q9CT17_MOUSE         | RRM domain-containing protein (Fragment) OS=Mus musculus OX=10090 GN=Srsf11 PE=2 SV=1               | MOUSE | 2  |
| 2418 | 3.08 | 3.14  | 48.53 | 48.53 | sp Q6W8Q3 PC4L1_MOUSE          | Purkinje cell protein 4-like protein 1 OS=Mus musculus OX=10090 GN=Pcp4l1 PE=1 SV=1                 | MOUSE | 2  |
| 2419 | 3.07 | 17.95 | 37.12 | 20.16 | tr A2A5Y6 A2A5Y6_MOUSE         | Microtubule-associated protein OS=Mus musculus OX=10090 GN=Mapt PE=1 SV=1                           | MOUSE | 16 |
| 2420 | 3.06 | 3.18  | 5.22  | 1.65  | tr B9EKS2 B9EKS2_MOUSE         | Jumonji domain containing 1B OS=Mus musculus OX=10090 GN=Kdm3b PE=1 SV=1                            | MOUSE | 2  |
| 2421 | 3.06 | 3.17  | 8.76  | 7.30  | sp Q8K2Q7 BROX_MOUSE           | BRO1 domain-containing protein BROX OS=Mus musculus OX=10090 GN=Brox PE=1 SV=1                      | MOUSE | 2  |
| 2422 | 3.06 | 3.16  | 13.49 | 5.55  | tr Q91V35 Q91V35_MOUSE         | Receptor-type tyrosine-protein phosphatase alpha OS=Mus musculus OX=10090 GN=Ptpa PE=1 SV=1         | MOUSE | 2  |
| 2423 | 3.06 | 3.15  | 15.78 | 5.54  | sp Q3TKY6 CWC27_MOUSE          | Spliceosome-associated protein CWC27 homolog OS=Mus musculus OX=10090 GN=Cwc27 PE=1 SV=1            | MOUSE | 2  |
| 2424 | 3.06 | 3.12  | 40.18 | 40.18 | tr Q9DCW5 Q9DCW5_MOUSE         | Cytochrome c oxidase subunit OS=Mus musculus OX=10090 GN=Cox6a1 PE=1 SV=1                           | MOUSE | 2  |
| 2425 | 3.05 | 3.12  | 21.44 | 5.19  | tr Q3UER8 Q3UER8_MOUSE         | Fibrinogen gamma chain OS=Mus musculus OX=10090 GN=Fgg PE=1 SV=1                                    | MOUSE | 2  |
| 2426 | 3.04 | 3.19  | 4.92  | 2.83  | sp Q9EPE9 AT131_MOUSE          | Endoplasmic reticulum transmembrane helix translocase OS=Mus musculus OX=10090 GN=Atp13a1 PE=1 SV=2 | MOUSE | 2  |
| 2427 | 3.02 | 3.25  | 21.50 | 8.25  | tr Q3TZ02 Q3TZ02_MOUSE         | Cytohesin-1 OS=Mus musculus OX=10090 GN=Cyth1 PE=1 SV=1                                             | MOUSE | 3  |

|      |      |       |       |       |                        |                                                                                                     |       |    |
|------|------|-------|-------|-------|------------------------|-----------------------------------------------------------------------------------------------------|-------|----|
| 2428 | 3.02 | 3.22  | 9.56  | 6.04  | sp Q8BHB9 CLIC6_MOUSE  | Chloride intracellular channel protein 6 OS=Mus musculus<br>OX=10090 GN=Clic6 PE=1 SV=1             | MOUSE | 3  |
| 2429 | 3.02 | 3.15  | 25.00 | 5.94  | tr D3Z4U0 D3Z4U0_MOUSE | Zinc finger Ran-binding domain-containing protein 2<br>OS=Mus musculus OX=10090 GN=Zranb2 PE=1 SV=2 | MOUSE | 2  |
| 2430 | 3.02 | 3.1   | 15.53 | 7.95  | sp Q9EST4 PSMG2_MOUSE  | Proteasome assembly chaperone 2 OS=Mus musculus<br>OX=10090 GN=Psmg2 PE=1 SV=1                      | MOUSE | 2  |
| 2431 | 3.02 | 3.09  | 38.06 | 26.87 | sp P84086 CPLX2_MOUSE  | Complexin-2 OS=Mus musculus OX=10090 GN=Cplx2 PE=1<br>SV=1                                          | MOUSE | 2  |
| 2432 | 3    | 12.88 | 54.89 | 42.93 | tr Q52L50 Q52L50_MOUSE | RAS related protein 1b OS=Mus musculus OX=10090<br>GN=Rap1b PE=1 SV=1                               | MOUSE | 8  |
| 2433 | 3    | 3.24  | 40.89 | 19.11 | tr Q3UGM5 Q3UGM5_MOUSE | Uncharacterized protein OS=Mus musculus OX=10090<br>GN=Mob4 PE=2 SV=1                               | MOUSE | 3  |
| 2434 | 2.99 | 3.18  | 9.08  | 1.61  | tr I1E4X5 I1E4X5_MOUSE | VPS35 endosomal protein-sorting factor-like OS=Mus<br>musculus OX=10090 GN=Vps35l PE=1 SV=1         | MOUSE | 1  |
| 2435 | 2.97 | 3.06  | 18.78 | 11.09 | sp Q9Z2L7 CRLF3_MOUSE  | Cytokine receptor-like factor 3 OS=Mus musculus<br>OX=10090 GN=Crlf3 PE=1 SV=1                      | MOUSE | 2  |
| 2436 | 2.97 | 3.05  | 15.91 | 10.23 | tr Q8VC93 Q8VC93_MOUSE | Eri3 protein (Fragment) OS=Mus musculus OX=10090<br>GN=Eri3 PE=2 SV=2                               | MOUSE | 2  |
| 2437 | 2.96 | 3.11  | 8.57  | 5.34  | tr B1AXN9 B1AXN9_MOUSE | Non-specific serine/threonine protein kinase OS=Mus<br>musculus OX=10090 GN=Rps6ka3 PE=1 SV=1       | MOUSE | 3  |
| 2438 | 2.96 | 3.06  | 19.58 | 10.00 | sp O09131 GSTO1_MOUSE  | Glutathione S-transferase omega-1 OS=Mus musculus<br>OX=10090 GN=Gsto1 PE=1 SV=2                    | MOUSE | 2  |
| 2439 | 2.96 | 3.04  | 19.89 | 14.20 | tr E9Q933 E9Q933_MOUSE | Transmembrane protein 11, mitochondrial OS=Mus<br>musculus OX=10090 GN=Tmem11 PE=1 SV=1             | MOUSE | 2  |
| 2440 | 2.95 | 19.36 | 80.00 | 56.67 | tr Q58E57 Q58E57_MOUSE | High mobility group nucleosomal binding domain 2<br>OS=Mus musculus OX=10090 GN=Hmg2 PE=2 SV=1      | MOUSE | 59 |
| 2441 | 2.95 | 11.99 | 13.37 | 5.33  | tr E9PV14 E9PV14_MOUSE | Band 4.1-like protein 1 OS=Mus musculus OX=10090<br>GN=Epb41l1 PE=1 SV=2                            | MOUSE | 7  |
| 2442 | 2.95 | 3.19  | 6.43  | 1.51  | sp Q62383 SPT6H_MOUSE  | Transcription elongation factor SPT6 OS=Mus musculus<br>OX=10090 GN=Supt6h PE=1 SV=2                | MOUSE | 2  |
| 2443 | 2.95 | 3.01  | 7.63  | 7.63  | tr Q80ZU1 Q80ZU1_MOUSE | WD repeat domain 68 OS=Mus musculus OX=10090<br>GN=Dcaf7 PE=2 SV=1                                  | MOUSE | 2  |
| 2444 | 2.94 | 4.12  | 9.36  | 5.40  | sp Q5QNP6 OSBP2_MOUSE  | Oxysterol-binding protein 2 OS=Mus musculus OX=10090<br>GN=Osbp2 PE=1 SV=1                          | MOUSE | 3  |

|      |      |      |       |       |                                |                                                                                                              |       |   |
|------|------|------|-------|-------|--------------------------------|--------------------------------------------------------------------------------------------------------------|-------|---|
| 2445 | 2.93 | 3.06 | 9.15  | 5.35  | tr Q8C541 Q8C541_MOUSE         | Fatty acid amide hydrolase OS=Mus musculus OX=10090 GN=Faah PE=2 SV=1                                        | MOUSE | 2 |
| 2446 | 2.92 | 3.36 | 57.53 | 16.67 | sp Q9Z0Y1 DCTN3_MOUSE          | Dynactin subunit 3 OS=Mus musculus OX=10090 GN=Dctn3 PE=1 SV=2                                               | MOUSE | 3 |
| 2447 | 2.92 | 3.01 | 16.63 | 5.69  | sp A6H630 ARMT1_MOUSE          | Damage-control phosphatase ARMT1 OS=Mus musculus OX=10090 GN=Armt1 PE=1 SV=1                                 | MOUSE | 2 |
| 2448 | 2.92 | 3.01 | 5.63  | 2.68  | tr A0A0A6YXH3 A0A0A6YXH3_MOUSE | Oxysterol-binding protein OS=Mus musculus OX=10090 GN=Osbp19 PE=1 SV=1                                       | MOUSE | 2 |
| 2449 | 2.92 | 2.97 | 11.83 | 6.80  | sp Q8R4N0 CLYBL_MOUSE          | Citramalyl-CoA lyase, mitochondrial OS=Mus musculus OX=10090 GN=Clybl PE=1 SV=2                              | MOUSE | 2 |
| 2450 | 2.91 | 5    | 6.51  | 3.37  | tr C7G3P1 C7G3P1_MOUSE         | MKIAA0654 protein (Fragment) OS=Mus musculus OX=10090 GN=Ppfia3 PE=2 SV=1                                    | MOUSE | 3 |
| 2451 | 2.91 | 2.98 | 16.41 | 12.82 | sp P62342 SELT_MOUSE           | Thioredoxin reductase-like selenoprotein T OS=Mus musculus OX=10090 GN=Selenot PE=1 SV=2                     | MOUSE | 2 |
| 2452 | 2.9  | 9.23 | 29.13 | 18.93 | tr Q8CCG5 Q8CCG5_MOUSE         | Small monomeric GTPase OS=Mus musculus OX=10090 GN=Ralb PE=2 SV=1                                            | MOUSE | 5 |
| 2453 | 2.9  | 3.09 | 6.27  | 3.84  | tr G5DDB7 G5DDB7_MOUSE         | Phosphoinositide phospholipase C OS=Mus musculus OX=10090 GN=Plcd1 PE=1 SV=1                                 | MOUSE | 3 |
| 2454 | 2.89 | 2.99 | 13.94 | 6.49  | tr A2AD85 A2AD85_MOUSE         | Protein kinase domain-containing protein OS=Mus musculus OX=10090 GN=Stk26 PE=1 SV=1                         | MOUSE | 2 |
| 2455 | 2.88 | 2.95 | 10.13 | 3.49  | sp Q8VHP6 CDHR1_MOUSE          | Cadherin-related family member 1 OS=Mus musculus OX=10090 GN=Cdhr1 PE=1 SV=1                                 | MOUSE | 2 |
| 2456 | 2.88 | 2.95 | 8.02  | 4.61  | sp P70303 PYRG2_MOUSE          | CTP synthase 2 OS=Mus musculus OX=10090 GN=Ctps2 PE=1 SV=1                                                   | MOUSE | 2 |
| 2457 | 2.88 | 2.94 | 6.88  | 5.40  | tr Q9DC13 Q9DC13_MOUSE         | Uncharacterized protein OS=Mus musculus OX=10090 GN=Lamp1 PE=2 SV=1                                          | MOUSE | 2 |
| 2458 | 2.88 | 2.94 | 25.70 | 25.14 | sp Q99LW6 YAF2_MOUSE           | YY1-associated factor 2 OS=Mus musculus OX=10090 GN=Yaf2 PE=1 SV=1                                           | MOUSE | 2 |
| 2459 | 2.87 | 2.98 | 24.66 | 16.44 | tr A0A1Y7VK19 A0A1Y7VK19_MOUSE | Iron-sulfur cluster assembly 2 homolog, mitochondrial (Fragment) OS=Mus musculus OX=10090 GN=Isca2 PE=1 SV=1 | MOUSE | 2 |
| 2460 | 2.85 | 3.03 | 9.61  | 6.86  | sp Q8BTS4 NUP54_MOUSE          | Nuclear pore complex protein Nup54 OS=Mus musculus OX=10090 GN=Nup54 PE=1 SV=1                               | MOUSE | 3 |



|      |      |      |       |       |                                |                                                                                                              |       |   |
|------|------|------|-------|-------|--------------------------------|--------------------------------------------------------------------------------------------------------------|-------|---|
| 2461 | 2.85 | 2.94 | 12.37 | 4.26  | tr A2RS23 A2RS23_MOUSE         | Peptidase D OS=Mus musculus OX=10090 GN=Pepd PE=1 SV=1                                                       | MOUSE | 2 |
| 2462 | 2.84 | 3.02 | 37.10 | 31.45 | tr Q542I7 Q542I7_MOUSE         | Late endosomal/lysosomal adaptor and MAPK and MTOR activator 3 OS=Mus musculus OX=10090 GN=Lamtor3 PE=1 SV=1 | MOUSE | 2 |
| 2463 | 2.84 | 2.93 | 42.03 | 21.01 | tr A2A8E2 A2A8E2_MOUSE         | CXXC motif containing zinc binding protein OS=Mus musculus OX=10090 GN=Czib PE=1 SV=1                        | MOUSE | 2 |
| 2464 | 2.84 | 2.9  | 31.77 | 13.54 | tr Z4YL87 Z4YL87_MOUSE         | Pre-rRNA-processing protein TSR2 homolog OS=Mus musculus OX=10090 GN=Tsr2 PE=1 SV=1                          | MOUSE | 2 |
| 2465 | 2.83 | 3.01 | 44.24 | 11.87 | tr Q3T9H8 Q3T9H8_MOUSE         | Uncharacterized protein OS=Mus musculus OX=10090 GN=Smug1 PE=2 SV=1                                          | MOUSE | 2 |
| 2466 | 2.82 | 2.99 | 36.49 | 28.38 | tr A0A158SIT5 A0A158SIT5_MOUSE | L antigen family, member 3 OS=Mus musculus OX=10090 GN=Lage3 PE=3 SV=1                                       | MOUSE | 3 |
| 2467 | 2.82 | 2.97 | 12.58 | 3.81  | tr B3V099 B3V099_MOUSE         | BetaCstF-64 variant 1 OS=Mus musculus OX=10090 GN=Cstf2 PE=2 SV=1                                            | MOUSE | 2 |
| 2468 | 2.82 | 2.88 | 15.97 | 15.97 | tr A0A1Y7VMB1 A0A1Y7VMB1_MOUSE | tRNA (guanine(37)-N1)-methyltransferase (Fragment) OS=Mus musculus OX=10090 GN=Trmt5 PE=1 SV=1               | MOUSE | 2 |
| 2469 | 2.81 | 2.96 | 8.16  | 3.34  | tr Q9CW64 Q9CW64_MOUSE         | Thioredoxin domain-containing protein (Fragment) OS=Mus musculus OX=10090 GN=Nhlrc2 PE=2 SV=1                | MOUSE | 2 |
| 2470 | 2.81 | 2.89 | 9.30  | 3.27  | sp Q8VCN5 CGL_MOUSE            | Cystathionine gamma-lyase OS=Mus musculus OX=10090 GN=Cth PE=1 SV=1                                          | MOUSE | 1 |
| 2471 | 2.81 | 2.87 | 30.50 | 19.00 | sp Q9CRA7 ATP5S_MOUSE          | ATP synthase subunit s, mitochondrial OS=Mus musculus OX=10090 GN=Dmac2l PE=1 SV=1                           | MOUSE | 2 |
| 2472 | 2.8  | 3.1  | 9.20  | 4.93  | sp Q8BYA0 TBCD_MOUSE           | Tubulin-specific chaperone D OS=Mus musculus OX=10090 GN=Tbcd PE=1 SV=1                                      | MOUSE | 5 |
| 2473 | 2.8  | 3.02 | 8.71  | 3.23  | tr Q3TI84 Q3TI84_MOUSE         | TPR_REGION domain-containing protein OS=Mus musculus OX=10090 GN=Cdc16 PE=1 SV=1                             | MOUSE | 2 |
| 2474 | 2.8  | 2.95 | 20.54 | 7.86  | sp Q9D020 5NT3A_MOUSE          | Cytosolic 5'-nucleotidase 3A OS=Mus musculus OX=10090 GN=Nt5c3a PE=1 SV=4                                    | MOUSE | 2 |
| 2475 | 2.8  | 2.95 | 14.45 | 7.81  | sp Q6PDY2 AEDO_MOUSE           | 2-aminoethanethiol dioxygenase OS=Mus musculus OX=10090 GN=Ado PE=1 SV=2                                     | MOUSE | 2 |
| 2476 | 2.8  | 2.85 | 32.14 | 32.14 | tr E0CY07 E0CY07_MOUSE         | Protein kish OS=Mus musculus OX=10090 GN=Tmem167 PE=1 SV=1                                                   | MOUSE | 2 |

|      |      |       |       |       |                                |                                                                                                            |       |   |
|------|------|-------|-------|-------|--------------------------------|------------------------------------------------------------------------------------------------------------|-------|---|
| 2477 | 2.79 | 2.88  | 6.50  | 1.94  | tr A0A571BG95 A0A571BG95_MOUSE | Active breakpoint cluster region-related protein OS=Mus musculus OX=10090 GN=Abr PE=1 SV=1                 | MOUSE | 2 |
| 2478 | 2.79 | 2.86  | 13.78 | 7.40  | sp O54724 CAVN1_MOUSE          | Caveolae-associated protein 1 OS=Mus musculus OX=10090 GN=Cavin1 PE=1 SV=1                                 | MOUSE | 2 |
| 2479 | 2.78 | 2.84  | 16.46 | 6.21  | tr D3YVC9 D3YVC9_MOUSE         | Graves disease carrier protein homolog (Fragment) OS=Mus musculus OX=10090 GN=Slc25a16 PE=1 SV=1           | MOUSE | 2 |
| 2480 | 2.78 | 2.83  | 11.32 | 10.69 | tr Q9D6J9 Q9D6J9_MOUSE         | Succinate dehydrogenase [ubiquinone] cytochrome b small subunit OS=Mus musculus OX=10090 GN=Sdhb PE=2 SV=1 | MOUSE | 2 |
| 2481 | 2.77 | 2.85  | 37.14 | 17.14 | sp Q9CZG9 PDZ11_MOUSE          | PDZ domain-containing protein 11 OS=Mus musculus OX=10090 GN=PDZ11 PE=1 SV=1                               | MOUSE | 1 |
| 2482 | 2.77 | 2.82  | 4.43  | 4.43  | sp Q8R1T1 CHMP7_MOUSE          | Charged multivesicular body protein 7 OS=Mus musculus OX=10090 GN=Chmp7 PE=1 SV=1                          | MOUSE | 2 |
| 2483 | 2.76 | 2.85  | 7.36  | 0.97  | tr Q3TT06 Q3TT06_MOUSE         | Nuclear pore complex protein OS=Mus musculus OX=10090 GN=Nup107 PE=2 SV=1                                  | MOUSE | 1 |
| 2484 | 2.76 | 2.84  | 24.78 | 8.70  | sp Q3UUI3 THEM4_MOUSE          | Acyl-coenzyme A thioesterase THEM4 OS=Mus musculus OX=10090 GN=Them4 PE=1 SV=1                             | MOUSE | 2 |
| 2485 | 2.74 | 4.87  | 15.64 | 15.64 | sp Q505D7 OPA3_MOUSE           | Optic atrophy 3 protein homolog OS=Mus musculus OX=10090 GN=Opa3 PE=1 SV=1                                 | MOUSE | 3 |
| 2486 | 2.74 | 3.06  | 24.02 | 11.35 | sp Q9JHS9 CWC15_MOUSE          | Spliceosome-associated protein CWC15 homolog OS=Mus musculus OX=10090 GN=Cwc15 PE=1 SV=1                   | MOUSE | 2 |
| 2487 | 2.74 | 2.89  | 9.04  | 4.27  | sp Q8BU14 SEC62_MOUSE          | Translocation protein SEC62 OS=Mus musculus OX=10090 GN=Sec62 PE=1 SV=1                                    | MOUSE | 2 |
| 2488 | 2.74 | 2.79  | 5.53  | 4.28  | tr Q3UF16 Q3UF16_MOUSE         | Procollagen-proline 4-dioxygenase OS=Mus musculus OX=10090 GN=P4ha1 PE=2 SV=1                              | MOUSE | 2 |
| 2489 | 2.73 | 10.08 | 24.40 | 15.01 | tr Q80Y51 Q80Y51_MOUSE         | ELAV-like protein OS=Mus musculus OX=10090 GN=Elavl2 PE=1 SV=1                                             | MOUSE | 6 |
| 2490 | 2.73 | 8.02  | 17.79 | 7.62  | sp Q3UMU9 HDGR2_MOUSE          | Hepatoma-derived growth factor-related protein 2 OS=Mus musculus OX=10090 GN=Hdgfl2 PE=1 SV=1              | MOUSE | 6 |
| 2491 | 2.73 | 4.84  | 5.85  | 3.61  | sp Q8C129 LCAP_MOUSE           | Leucyl-cystinyl aminopeptidase OS=Mus musculus OX=10090 GN=Lnpep PE=1 SV=1                                 | MOUSE | 3 |
| 2492 | 2.73 | 2.8   | 28.25 | 15.25 | tr Q3ULK8 Q3ULK8_MOUSE         | Uncharacterized protein OS=Mus musculus OX=10090 GN=Cnbp PE=1 SV=1                                         | MOUSE | 2 |

|      |      |      |       |       |                                |                                                                                                  |       |   |
|------|------|------|-------|-------|--------------------------------|--------------------------------------------------------------------------------------------------|-------|---|
| 2493 | 2.71 | 2.99 | 13.75 | 3.66  | sp Q8CCJ3 UFL1_MOUSE           | E3 UFM1-protein ligase 1 OS=Mus musculus OX=10090 GN=Ufl1 PE=1 SV=2                              | MOUSE | 2 |
| 2494 | 2.71 | 2.78 | 5.04  | 4.04  | tr Q8C9W5 Q8C9W5_MOUSE         | Uncharacterized protein (Fragment) OS=Mus musculus OX=10090 GN=Erap1 PE=2 SV=1                   | MOUSE | 2 |
| 2495 | 2.71 | 2.76 | 17.91 | 11.34 | sp Q8K409 DPOLB_MOUSE          | DNA polymerase beta OS=Mus musculus OX=10090 GN=Polb PE=1 SV=3                                   | MOUSE | 2 |
| 2496 | 2.7  | 2.77 | 5.73  | 3.34  | tr Q3UGC1 Q3UGC1_MOUSE         | Uncharacterized protein OS=Mus musculus OX=10090 GN=Strip1 PE=2 SV=1                             | MOUSE | 2 |
| 2497 | 2.69 | 3.48 | 25.49 | 25.49 | sp P62311 LSM3_MOUSE           | U6 snRNA-associated Sm-like protein LSm3 OS=Mus musculus OX=10090 GN=Lsm3 PE=1 SV=2              | MOUSE | 3 |
| 2498 | 2.68 | 2.8  | 10.84 | 5.05  | sp Q8K2T8 PAF1_MOUSE           | RNA polymerase II-associated factor 1 homolog OS=Mus musculus OX=10090 GN=Paf1 PE=1 SV=1         | MOUSE | 2 |
| 2499 | 2.68 | 2.75 | 7.85  | 2.99  | tr Q3TCW5 Q3TCW5_MOUSE         | Protein kinase domain-containing protein OS=Mus musculus OX=10090 GN=Nrbp1 PE=2 SV=1             | MOUSE | 1 |
| 2500 | 2.67 | 2.81 | 12.13 | 8.52  | sp Q9DCV4 RMD1_MOUSE           | Regulator of microtubule dynamics protein 1 OS=Mus musculus OX=10090 GN=Rmdn1 PE=1 SV=2          | MOUSE | 2 |
| 2501 | 2.66 | 3.08 | 15.62 | 6.29  | tr Q3U232 Q3U232_MOUSE         | Coronin OS=Mus musculus OX=10090 GN=Coro1a PE=2 SV=1                                             | MOUSE | 1 |
| 2502 | 2.66 | 2.74 | 10.44 | 3.70  | sp O35385 PPE2_MOUSE           | Serine/threonine-protein phosphatase with EF-hands 2 OS=Mus musculus OX=10090 GN=Ppef2 PE=2 SV=1 | MOUSE | 3 |
| 2503 | 2.66 | 2.73 | 15.34 | 6.35  | tr Q4FJQ6 Q4FJQ6_MOUSE         | Serpina6a protein OS=Mus musculus OX=10090 GN=Serpina6a PE=1 SV=1                                | MOUSE | 2 |
| 2504 | 2.66 | 2.71 | 17.57 | 6.71  | sp Q80X95 RRAGA_MOUSE          | Ras-related GTP-binding protein A OS=Mus musculus OX=10090 GN=RragA PE=1 SV=1                    | MOUSE | 2 |
| 2505 | 2.65 | 2.79 | 10.74 | 9.20  | sp Q9DCJ1 LST8_MOUSE           | Target of rapamycin complex subunit LST8 OS=Mus musculus OX=10090 GN=Mlst8 PE=1 SV=1             | MOUSE | 2 |
| 2506 | 2.65 | 2.7  | 28.32 | 17.70 | sp Q9D0A3 ARPIN_MOUSE          | Arpin OS=Mus musculus OX=10090 GN=Arpin PE=1 SV=1                                                | MOUSE | 3 |
| 2507 | 2.64 | 2.84 | 4.73  | 0.93  | tr Q8CHA4 Q8CHA4_MOUSE         | MKIAA1329 protein (Fragment) OS=Mus musculus OX=10090 GN=Sorcs2 PE=2 SV=1                        | MOUSE | 1 |
| 2508 | 2.63 | 2.76 | 3.99  | 2.00  | tr A0A0N4SW93 A0A0N4SW93_MOUSE | C2 domain-containing protein 5 OS=Mus musculus OX=10090 GN=C2cd5 PE=1 SV=1                       | MOUSE | 2 |
| 2509 | 2.63 | 2.71 | 14.09 | 4.29  | tr Q7TPT3 Q7TPT3_MOUSE         | Exocyst complex component 7 OS=Mus musculus OX=10090 GN=Exoc7 PE=2 SV=1                          | MOUSE | 2 |

|      |      |        |       |       |                                |                                                                                                  |       |    |
|------|------|--------|-------|-------|--------------------------------|--------------------------------------------------------------------------------------------------|-------|----|
| 2510 | 2.63 | 2.67   | 7.04  | 7.04  | tr Q8BQV8 Q8BQV8_MOUSE         | Sulfotransferase OS=Mus musculus OX=10090 GN=Sult4a1 PE=2 SV=1                                   | MOUSE | 2  |
| 2511 | 2.62 | 2.79   | 17.45 | 12.50 | sp Q8C5W3 TBCEL_MOUSE          | Tubulin-specific chaperone cofactor E-like protein OS=Mus musculus OX=10090 GN=Tbcel PE=1 SV=1   | MOUSE | 3  |
| 2512 | 2.62 | 2.74   | 18.06 | 10.56 | sp Q8BTZ7 GMPPB_MOUSE          | Mannose-1-phosphate guanylttransferase beta OS=Mus musculus OX=10090 GN=Gmppb PE=1 SV=1          | MOUSE | 2  |
| 2513 | 2.62 | 2.7    | 3.38  | 2.67  | tr D3Z4I0 D3Z4I0_MOUSE         | GPI ethanolamine phosphate transferase 2 OS=Mus musculus OX=10090 GN=Pigg PE=1 SV=1              | MOUSE | 2  |
| 2514 | 2.61 | 5.1    | 14.26 | 8.63  | tr Q3UJS6 Q3UJS6_MOUSE         | Uncharacterized protein OS=Mus musculus OX=10090 GN=Cpne3 PE=2 SV=1                              | MOUSE | 5  |
| 2515 | 2.61 | 2.67   | 12.76 | 1.51  | tr Q8K366 Q8K366_MOUSE         | Exosc10 protein OS=Mus musculus OX=10090 GN=Exosc10 PE=1 SV=1                                    | MOUSE | 1  |
| 2516 | 2.6  | 107.83 | 78.11 | 71.31 | sp O08599-2 STXB1_MOUSE        | Isoform 2 of Syntaxin-binding protein 1 OS=Mus musculus OX=10090 GN=Stxbp1                       | MOUSE | 68 |
| 2517 | 2.6  | 56.5   | 49.02 | 49.02 | tr Q0VG47 Q0VG47_MOUSE         | Heterogeneous nuclear ribonucleoprotein A3 OS=Mus musculus OX=10090 GN=Hnrnpa3 PE=2 SV=1         | MOUSE | 38 |
| 2518 | 2.6  | 2.76   | 8.15  | 5.17  | sp Q8K0C4 CP51A_MOUSE          | Lanosterol 14-alpha demethylase OS=Mus musculus OX=10090 GN=Cyp51a1 PE=1 SV=1                    | MOUSE | 2  |
| 2519 | 2.6  | 2.66   | 23.31 | 14.83 | tr A2AER8 A2AER8_MOUSE         | Polyglutamine tract-binding protein 1 (Fragment) OS=Mus musculus OX=10090 GN=Pqbp1 PE=1 SV=1     | MOUSE | 2  |
| 2520 | 2.6  | 2.65   | 8.50  | 3.96  | tr Q8CFR5 Q8CFR5_MOUSE         | Dystrobrevin OS=Mus musculus OX=10090 GN=Dtna PE=1 SV=1                                          | MOUSE | 2  |
| 2521 | 2.59 | 2.65   | 36.99 | 15.61 | sp Q9D735 TRIR_MOUSE           | Telomerase RNA component interacting RNase OS=Mus musculus OX=10090 GN=Trir PE=1 SV=1            | MOUSE | 1  |
| 2522 | 2.59 | 2.64   | 5.78  | 1.86  | sp Q80TR8 DCAF1_MOUSE          | DDB1- and CUL4-associated factor 1 OS=Mus musculus OX=10090 GN=Dcaf1 PE=1 SV=4                   | MOUSE | 2  |
| 2523 | 2.59 | 2.63   | 36.36 | 36.36 | tr A0A0G2JFK6 A0A0G2JFK6_MOUSE | Coiled-coil domain-containing protein 12 (Fragment) OS=Mus musculus OX=10090 GN=Ccdc12 PE=1 SV=1 | MOUSE | 2  |
| 2524 | 2.58 | 4.78   | 24.40 | 5.57  | tr Q3UE40 Q3UE40_MOUSE         | Uncharacterized protein OS=Mus musculus OX=10090 GN=Gna13 PE=2 SV=1                              | MOUSE | 2  |
| 2525 | 2.58 | 2.76   | 6.60  | 2.04  | tr B7ZN33 B7ZN33_MOUSE         | Nisch protein (Fragment) OS=Mus musculus OX=10090 GN=Nisch PE=2 SV=1                             | MOUSE | 2  |
| 2526 | 2.58 | 2.73   | 18.35 | 13.61 | sp O70209 PDLI3_MOUSE          | PDZ and LIM domain protein 3 OS=Mus musculus OX=10090 GN=Pdlim3 PE=1 SV=1                        | MOUSE | 2  |

|      |      |       |       |       |                                |                                                                                                   |       |    |
|------|------|-------|-------|-------|--------------------------------|---------------------------------------------------------------------------------------------------|-------|----|
| 2527 | 2.57 | 2.67  | 8.02  | 6.11  | tr A0A0A6YXC8 A0A0A6YXC8_MOUSE | Protein enabled homolog OS=Mus musculus OX=10090 GN=Enah PE=1 SV=1                                | MOUSE | 2  |
| 2528 | 2.56 | 2.66  | 21.39 | 15.03 | tr Q8K3J2 Q8K3J2_MOUSE         | Bcl2-associated X protein kappa isoform OS=Mus musculus OX=10090 GN=Bax PE=2 SV=1                 | MOUSE | 2  |
| 2529 | 2.55 | 2.74  | 8.91  | 1.96  | sp Q99PU8-3 DHX30_MOUSE        | Isoform 3 of ATP-dependent RNA helicase DHX30 OS=Mus musculus OX=10090 GN=Dhx30                   | MOUSE | 2  |
| 2530 | 2.55 | 2.59  | 24.74 | 11.05 | sp Q8K3C3 LZIC_MOUSE           | Protein LZIC OS=Mus musculus OX=10090 GN=Lzic PE=1 SV=1                                           | MOUSE | 2  |
| 2531 | 2.54 | 6.32  | 16.53 | 7.35  | sp Q2NL51 GSK3A_MOUSE          | Glycogen synthase kinase-3 alpha OS=Mus musculus OX=10090 GN=Gsk3a PE=1 SV=2                      | MOUSE | 3  |
| 2532 | 2.54 | 2.76  | 14.12 | 1.40  | sp P42232 STA5B_MOUSE          | Signal transducer and activator of transcription 5B OS=Mus musculus OX=10090 GN=Stat5b PE=1 SV=1  | MOUSE | 1  |
| 2533 | 2.54 | 2.72  | 9.18  | 2.89  | tr Q5SQ20 Q5SQ20_MOUSE         | Pescadillo homolog OS=Mus musculus OX=10090 GN=Pes1 PE=1 SV=1                                     | MOUSE | 2  |
| 2534 | 2.54 | 2.67  | 6.69  | 0.62  | sp Q8C9B9 DIDO1_MOUSE          | Death-inducer obliterator 1 OS=Mus musculus OX=10090 GN=Dido1 PE=1 SV=4                           | MOUSE | 1  |
| 2535 | 2.54 | 2.58  | 9.92  | 5.37  | tr Z4YM84 Z4YM84_MOUSE         | Acyl-CoA-binding domain-containing protein 5 OS=Mus musculus OX=10090 GN=Acbd5 PE=1 SV=2          | MOUSE | 2  |
| 2536 | 2.53 | 2.63  | 6.44  | 3.40  | sp Q8R5H6 WASF1_MOUSE          | Wiskott-Aldrich syndrome protein family member 1 OS=Mus musculus OX=10090 GN=Wasf1 PE=1 SV=2      | MOUSE | 2  |
| 2537 | 2.53 | 2.58  | 14.60 | 6.06  | tr G5E8V8 G5E8V8_MOUSE         | Phosphorylated adapter RNA export protein OS=Mus musculus OX=10090 GN=Phax PE=1 SV=1              | MOUSE | 2  |
| 2538 | 2.53 | 2.58  | 11.95 | 4.43  | tr Q3TY06 Q3TY06_MOUSE         | Alpha-MPP (Fragment) OS=Mus musculus OX=10090 GN=Pmpca PE=2 SV=1                                  | MOUSE | 2  |
| 2539 | 2.53 | 2.57  | 6.95  | 5.52  | tr Q9DBE7 Q9DBE7_MOUSE         | Double-stranded RNA-binding protein Staufen homolog 1 OS=Mus musculus OX=10090 GN=Stau1 PE=1 SV=1 | MOUSE | 2  |
| 2540 | 2.52 | 19.02 | 32.47 | 21.79 | sp Q61033 LAP2A_MOUSE          | Lamina-associated polypeptide 2, isoforms alpha/zeta OS=Mus musculus OX=10090 GN=Tmpo PE=1 SV=4   | MOUSE | 13 |
| 2541 | 2.52 | 2.58  | 11.48 | 3.55  | tr Q6NXW0 Q6NXW0_MOUSE         | Non-specific serine/threonine protein kinase OS=Mus musculus OX=10090 GN=Akt3 PE=2 SV=1           | MOUSE | 1  |
| 2542 | 2.52 | 2.55  | 19.57 | 19.57 | sp Q9CR60 GOT1B_MOUSE          | Vesicle transport protein GOT1B OS=Mus musculus OX=10090 GN=Golt1b PE=1 SV=1                      | MOUSE | 2  |
| 2543 | 2.51 | 2.63  | 6.52  | 1.50  | tr Q7TT13 Q7TT13_MOUSE         | Mink1 protein OS=Mus musculus OX=10090 GN=Mink1 PE=2 SV=1                                         | MOUSE | 2  |

|      |      |      |       |       |                        |                                                                                                            |       |   |
|------|------|------|-------|-------|------------------------|------------------------------------------------------------------------------------------------------------|-------|---|
| 2544 | 2.51 | 2.56 | 14.58 | 8.66  | sp C0HKD9 MFA1B_MOUSE  | Microfibrillar-associated protein 1B OS=Mus musculus<br>OX=10090 GN=Mfap1b PE=1 SV=1                       | MOUSE | 2 |
| 2545 | 2.51 | 2.55 | 29.81 | 23.08 | sp P61458 PHS_MOUSE    | Pterin-4-alpha-carbinolamine dehydratase OS=Mus musculus<br>OX=10090 GN=Pcbd1 PE=1 SV=2                    | MOUSE | 2 |
| 2546 | 2.5  | 6.84 | 28.79 | 17.03 | sp Q8BHZ0 CYRIA_MOUSE  | CYFIP-related Rac1 interactor A OS=Mus musculus<br>OX=10090 GN=Cyria PE=1 SV=1                             | MOUSE | 4 |
| 2547 | 2.49 | 2.61 | 13.60 | 11.03 | tr Q8BP79 Q8BP79_MOUSE | Holocytochrome c-type synthase OS=Mus musculus<br>OX=10090 GN=Hccs PE=2 SV=1                               | MOUSE | 2 |
| 2548 | 2.49 | 2.53 | 13.79 | 13.79 | sp Q8CHP5 PYM1_MOUSE   | Partner of Y14 and mago OS=Mus musculus OX=10090<br>GN=Pym1 PE=1 SV=2                                      | MOUSE | 2 |
| 2549 | 2.49 | 2.52 | 20.00 | 10.27 | tr D3Z6H3 D3Z6H3_MOUSE | Dynactin subunit 6 OS=Mus musculus OX=10090<br>GN=Dctn6 PE=1 SV=1                                          | MOUSE | 2 |
| 2550 | 2.48 | 3.26 | 6.02  | 1.87  | tr Q5DTY3 Q5DTY3_MOUSE | Conserved oligomeric Golgi complex subunit 1 (Fragment)<br>OS=Mus musculus OX=10090 GN=mKIAA1381 PE=3 SV=1 | MOUSE | 2 |
| 2551 | 2.48 | 2.83 | 9.49  | 2.28  | tr Q3UDN2 Q3UDN2_MOUSE | Vacuolar protein sorting-associated protein 53 homolog<br>OS=Mus musculus OX=10090 GN=Vps53 PE=2 SV=1      | MOUSE | 2 |
| 2552 | 2.48 | 2.61 | 9.85  | 9.85  | tr I6L990 I6L990_MOUSE | Samd11 protein OS=Mus musculus OX=10090 GN=Samd11<br>PE=2 SV=1                                             | MOUSE | 2 |
| 2553 | 2.48 | 2.59 | 3.70  | 2.47  | tr F8VQK3 F8VQK3_MOUSE | Guanylate cyclase OS=Mus musculus OX=10090<br>GN=Gucy1a2 PE=1 SV=1                                         | MOUSE | 2 |
| 2554 | 2.47 | 2.58 | 27.57 | 11.21 | tr Q9CRA2 Q9CRA2_MOUSE | PDZ and LIM domain protein 5 OS=Mus musculus<br>OX=10090 GN=Pdlim5 PE=1 SV=1                               | MOUSE | 2 |
| 2555 | 2.47 | 2.51 | 8.19  | 3.93  | tr E9Q9M1 E9Q9M1_MOUSE | Cytosolic purine 5'-nucleotidase OS=Mus musculus<br>OX=10090 GN=Nt5c2 PE=1 SV=1                            | MOUSE | 2 |
| 2556 | 2.47 | 2.5  | 16.54 | 13.16 | tr Q9CVI1 Q9CVI1_MOUSE | Flavodoxin_2 domain-containing protein (Fragment)<br>OS=Mus musculus OX=10090 GN=Nqo2 PE=2 SV=1            | MOUSE | 2 |
| 2557 | 2.46 | 2.6  | 16.59 | 4.23  | sp Q8BZR9 NCBP3_MOUSE  | Nuclear cap-binding protein subunit 3 OS=Mus musculus<br>OX=10090 GN=Ncbp3 PE=1 SV=1                       | MOUSE | 2 |
| 2558 | 2.46 | 2.57 | 16.27 | 1.89  | sp Q99KC8 VMA5A_MOUSE  | von Willebrand factor A domain-containing protein 5A<br>OS=Mus musculus OX=10090 GN=Vwa5a PE=1 SV=2        | MOUSE | 1 |
| 2559 | 2.46 | 2.49 | 3.87  | 3.87  | sp Q8K3X4 I2BPL_MOUSE  | Probable E3 ubiquitin-protein ligase IRF2BPL OS=Mus musculus<br>OX=10090 GN=Irf2bpl PE=1 SV=1              | MOUSE | 2 |

|      |      |      |       |       |                                |                                                                                                    |       |   |
|------|------|------|-------|-------|--------------------------------|----------------------------------------------------------------------------------------------------|-------|---|
| 2560 | 2.44 | 2.5  | 8.95  | 1.26  | tr Q3UZA5 Q3UZA5_MOUSE         | Uncharacterized protein OS=Mus musculus OX=10090 GN=Kifap3 PE=2 SV=1                               | MOUSE | 1 |
| 2561 | 2.44 | 2.47 | 13.60 | 13.60 | tr Q3TF81 Q3TF81_MOUSE         | Uncharacterized protein (Fragment) OS=Mus musculus OX=10090 GN=Rpp30 PE=2 SV=1                     | MOUSE | 2 |
| 2562 | 2.44 | 2.47 | 11.70 | 11.70 | sp Q9D7X8 GGCT_MOUSE           | Gamma-glutamylcylotransferase OS=Mus musculus OX=10090 GN=Ggct PE=1 SV=1                           | MOUSE | 2 |
| 2563 | 2.43 | 2.47 | 32.10 | 19.75 | tr A0A2I3BQC3 A0A2I3BQC3_MOUSE | Small integral membrane protein 40 OS=Mus musculus OX=10090 GN=Smim40 PE=4 SV=1                    | MOUSE | 2 |
| 2564 | 2.43 | 2.46 | 12.32 | 8.12  | tr B5TZD5 B5TZD5_MOUSE         | D4 zinc and double PHD finger family 3 splice variant a OS=Mus musculus OX=10090 GN=Dpf3 PE=2 SV=1 | MOUSE | 2 |
| 2565 | 2.41 | 2.54 | 9.79  | 5.00  | sp Q99M87 DNJA3_MOUSE          | DnaJ homolog subfamily A member 3, mitochondrial OS=Mus musculus OX=10090 GN=Dnaja3 PE=1 SV=1      | MOUSE | 2 |
| 2566 | 2.41 | 2.52 | 13.70 | 9.93  | tr Q14B19 Q14B19_MOUSE         | Ventral anterior homeobox containing gene 2 OS=Mus musculus OX=10090 GN=Vax2 PE=2 SV=1             | MOUSE | 2 |
| 2567 | 2.41 | 2.44 | 19.10 | 19.10 | sp Q9D1I5 MCEE_MOUSE           | Methylmalonyl-CoA epimerase, mitochondrial OS=Mus musculus OX=10090 GN=Mcee PE=1 SV=1              | MOUSE | 2 |
| 2568 | 2.4  | 2.5  | 16.08 | 8.48  | tr Q3TZ44 Q3TZ44_MOUSE         | Aldose 1-epimerase OS=Mus musculus OX=10090 GN=Galm PE=2 SV=1                                      | MOUSE | 2 |
| 2569 | 2.4  | 2.44 | 13.96 | 11.04 | tr Q9D1J2 Q9D1J2_MOUSE         | Coatomer subunit epsilon OS=Mus musculus OX=10090 GN=Cope PE=2 SV=1                                | MOUSE | 2 |
| 2570 | 2.4  | 2.43 | 18.22 | 13.77 | tr Q3URS8 Q3URS8_MOUSE         | Uncharacterized protein OS=Mus musculus OX=10090 GN=Mlf2 PE=2 SV=1                                 | MOUSE | 2 |
| 2571 | 2.4  | 2.43 | 13.06 | 3.82  | sp Q8VDN4 CCD92_MOUSE          | Coiled-coil domain-containing protein 92 OS=Mus musculus OX=10090 GN=Ccd92 PE=1 SV=1               | MOUSE | 1 |
| 2572 | 2.39 | 2.65 | 9.56  | 2.19  | sp P27641 XRCC5_MOUSE          | X-ray repair cross-complementing protein 5 OS=Mus musculus OX=10090 GN=Xrcc5 PE=1 SV=4             | MOUSE | 1 |
| 2573 | 2.38 | 2.5  | 15.09 | 3.02  | tr Q4FK57 Q4FK57_MOUSE         | Ero1l protein OS=Mus musculus OX=10090 GN=Ero1a PE=1 SV=1                                          | MOUSE | 1 |
| 2574 | 2.38 | 2.43 | 6.80  | 1.13  | sp Q8BY89 CTL2_MOUSE           | Choline transporter-like protein 2 OS=Mus musculus OX=10090 GN=Slc44a2 PE=1 SV=2                   | MOUSE | 1 |
| 2575 | 2.38 | 2.41 | 10.60 | 4.87  | tr Q9D0K3 Q9D0K3_MOUSE         | AAA domain-containing protein OS=Mus musculus OX=10090 GN=Rfc2 PE=2 SV=1                           | MOUSE | 1 |
| 2576 | 2.37 | 2.57 | 7.64  | 2.58  | sp Q9Z0H8 CLIP2_MOUSE          | CAP-Gly domain-containing linker protein 2 OS=Mus musculus OX=10090 GN=Clip2 PE=1 SV=2             | MOUSE | 2 |

|      |      |      |       |       |                         |                                                                                                             |       |   |
|------|------|------|-------|-------|-------------------------|-------------------------------------------------------------------------------------------------------------|-------|---|
| 2577 | 2.37 | 2.43 | 6.93  | 2.31  | tr B2RUK5 B2RUK5_MOUSE  | Methylcrotonoyl-Coenzyme A carboxylase 2 (Beta) OS=Mus musculus OX=10090 GN=Mccc2 PE=1 SV=1                 | MOUSE | 1 |
| 2578 | 2.36 | 2.55 | 13.61 | 10.82 | sp Q8BZX4-2 SREK1_MOUSE | Isoform 2 of Splicing regulatory glutamine/lysine-rich protein 1 OS=Mus musculus OX=10090 GN=Srek1          | MOUSE | 4 |
| 2579 | 2.36 | 2.4  | 3.00  | 0.64  | tr Q3TSQ2 Q3TSQ2_MOUSE  | Uncharacterized protein OS=Mus musculus OX=10090 GN=Pogz PE=2 SV=1                                          | MOUSE | 1 |
| 2580 | 2.36 | 2.4  | 7.55  | 2.60  | sp Q8VHL0 UT1_MOUSE     | Urea transporter 1 OS=Mus musculus OX=10090 GN=Slc14a1 PE=1 SV=2                                            | MOUSE | 1 |
| 2581 | 2.36 | 2.39 | 12.16 | 3.65  | sp Q9D2E2-2 TOE1_MOUSE  | Isoform 2 of Target of EGR1 protein 1 OS=Mus musculus OX=10090 GN=Toe1                                      | MOUSE | 1 |
| 2582 | 2.35 | 4.22 | 27.96 | 5.11  | sp Q99J95 CDK9_MOUSE    | Cyclin-dependent kinase 9 OS=Mus musculus OX=10090 GN=Cdk9 PE=1 SV=1                                        | MOUSE | 2 |
| 2583 | 2.35 | 2.48 | 5.85  | 1.66  | tr M4TKR7 M4TKR7_MOUSE  | Tyrosine-protein kinase receptor OS=Mus musculus OX=10090 GN=Insr PE=2 SV=1                                 | MOUSE | 2 |
| 2584 | 2.33 | 2.48 | 7.89  | 1.44  | sp Q6PAR5 GAPD1_MOUSE   | GTPase-activating protein and VPS9 domain-containing protein 1 OS=Mus musculus OX=10090 GN=Gapvd1 PE=1 SV=2 | MOUSE | 2 |
| 2585 | 2.32 | 2.44 | 12.29 | 9.32  | tr G5E8W7 G5E8W7_MOUSE  | Lysosomal thioesterase PPT2 (Fragment) OS=Mus musculus OX=10090 GN=Ppt2 PE=1 SV=1                           | MOUSE | 2 |
| 2586 | 2.32 | 2.42 | 7.32  | 7.32  | sp Q9DBG5 PLIN3_MOUSE   | Perilipin-3 OS=Mus musculus OX=10090 GN=Plin3 PE=1 SV=1                                                     | MOUSE | 2 |
| 2587 | 2.32 | 2.34 | 5.25  | 5.25  | sp Q80TL4 PHF24_MOUSE   | PHD finger protein 24 OS=Mus musculus OX=10090 GN=Phf24 PE=1 SV=2                                           | MOUSE | 2 |
| 2588 | 2.31 | 2.47 | 8.17  | 5.55  | sp Q80U56 AVL9_MOUSE    | Late secretory pathway protein AVL9 homolog OS=Mus musculus OX=10090 GN=Avl9 PE=1 SV=2                      | MOUSE | 3 |
| 2589 | 2.31 | 2.34 | 7.69  | 4.94  | tr Q9EQ66 Q9EQ66_MOUSE  | Aspartyl beta-hydroxylase OS=Mus musculus OX=10090 GN=ASPH PE=3 SV=1                                        | MOUSE | 1 |
| 2590 | 2.31 | 2.34 | 15.71 | 8.57  | sp Q8BIS8 CC126_MOUSE   | Coiled-coil domain-containing protein 126 OS=Mus musculus OX=10090 GN=Ccdc126 PE=2 SV=1                     | MOUSE | 1 |
| 2591 | 2.3  | 9.51 | 7.68  | 4.19  | tr Q0VGY9 Q0VGY9_MOUSE  | Ank1 protein OS=Mus musculus OX=10090 GN=Ank1 PE=1 SV=1                                                     | MOUSE | 7 |
| 2592 | 2.3  | 2.62 | 14.86 | 3.51  | sp Q9Z2Y3-2 HOME1_MOUSE | Isoform 2 of Homer protein homolog 1 OS=Mus musculus OX=10090 GN=Homer1                                     | MOUSE | 1 |



|      |      |        |       |       |                        |                                                                                             |       |     |
|------|------|--------|-------|-------|------------------------|---------------------------------------------------------------------------------------------|-------|-----|
| 2593 | 2.3  | 2.34   | 26.55 | 11.06 | sp P40240 CD9_MOUSE    | CD9 antigen OS=Mus musculus OX=10090 GN=Cd9 PE=1 SV=2                                       | MOUSE | 2   |
| 2594 | 2.29 | 318.27 | 71.62 | 66.57 | tr A3KGU9 A3KGU9_MOUSE | Spectrin alpha chain, non-erythrocytic 1 OS=Mus musculus OX=10090 GN=Sptan1 PE=1 SV=2       | MOUSE | 170 |
| 2595 | 2.29 | 2.44   | 11.70 | 9.04  | tr B0V2Q7 B0V2Q7_MOUSE | Lclat1 protein OS=Mus musculus OX=10090 GN=Lclat1 PE=1 SV=1                                 | MOUSE | 2   |
| 2596 | 2.29 | 2.33   | 10.70 | 2.28  | tr A2AR56 A2AR56_MOUSE | FERM domain-containing protein 5 OS=Mus musculus OX=10090 GN=Frmd5 PE=1 SV=1                | MOUSE | 1   |
| 2597 | 2.28 | 2.46   | 27.43 | 10.97 | tr Q3U6J4 Q3U6J4_MOUSE | Uncharacterized protein (Fragment) OS=Mus musculus OX=10090 GN=Mettl3 PE=2 SV=1             | MOUSE | 4   |
| 2598 | 2.28 | 2.39   | 6.92  | 2.89  | sp Q80T69 RSBN1_MOUSE  | Lysine-specific demethylase 9 OS=Mus musculus OX=10090 GN=Rsb1 PE=1 SV=3                    | MOUSE | 2   |
| 2599 | 2.28 | 2.31   | 13.12 | 4.37  | tr A2AUC6 A2AUC6_MOUSE | Bardet-Biedl syndrome 5 protein homolog OS=Mus musculus OX=10090 GN=Bbs5 PE=1 SV=1          | MOUSE | 1   |
| 2600 | 2.28 | 2.31   | 13.39 | 4.91  | sp Q99M71 EPDR1_MOUSE  | Mammalian ependymin-related protein 1 OS=Mus musculus OX=10090 GN=Epdr1 PE=1 SV=1           | MOUSE | 1   |
| 2601 | 2.27 | 4.22   | 10.83 | 7.50  | tr Q6AXH6 Q6AXH6_MOUSE | Abi2 protein OS=Mus musculus OX=10090 GN=Abi2 PE=1 SV=1                                     | MOUSE | 3   |
| 2602 | 2.27 | 2.31   | 22.76 | 4.84  | tr Q8BYP9 Q8BYP9_MOUSE | GB1/RHD3-type G domain-containing protein OS=Mus musculus OX=10090 GN=Atl2 PE=2 SV=1        | MOUSE | 1   |
| 2603 | 2.26 | 10.4   | 31.88 | 22.22 | tr Q0PD49 Q0PD49_MOUSE | RAB8B, member RAS oncogene family OS=Mus musculus OX=10090 GN=Rab8b PE=1 SV=1               | MOUSE | 5   |
| 2604 | 2.26 | 2.37   | 16.32 | 2.97  | tr D3Z132 D3Z132_MOUSE | THO complex subunit 6 homolog OS=Mus musculus OX=10090 GN=Thoc6 PE=1 SV=1                   | MOUSE | 1   |
| 2605 | 2.26 | 2.36   | 9.62  | 9.62  | tr Q7TMX6 Q7TMX6_MOUSE | Exosome component 7 OS=Mus musculus OX=10090 GN=Exosc7 PE=2 SV=1                            | MOUSE | 2   |
| 2606 | 2.26 | 2.29   | 6.19  | 2.06  | sp Q9JI90 RNF14_MOUSE  | E3 ubiquitin-protein ligase RNF14 OS=Mus musculus OX=10090 GN=Rnf14 PE=1 SV=2               | MOUSE | 1   |
| 2607 | 2.25 | 2.28   | 13.05 | 7.14  | sp Q3URS9 MITOK_MOUSE  | Mitochondrial potassium channel OS=Mus musculus OX=10090 GN=Ccdc51 PE=1 SV=1                | MOUSE | 2   |
| 2608 | 2.25 | 2.27   | 15.09 | 7.37  | tr Q91VJ9 Q91VJ9_MOUSE | 1-acyl-sn-glycerol-3-phosphate acyltransferase OS=Mus musculus OX=10090 GN=Agpat1 PE=2 SV=1 | MOUSE | 1   |
| 2609 | 2.25 | 2.27   | 13.04 | 4.01  | sp Q9JKY0 CNOT9_MOUSE  | CCR4-NOT transcription complex subunit 9 OS=Mus musculus OX=10090 GN=Cnot9 PE=1 SV=1        | MOUSE | 1   |

|      |      |       |       |       |                                |                                                                                                                            |       |   |
|------|------|-------|-------|-------|--------------------------------|----------------------------------------------------------------------------------------------------------------------------|-------|---|
| 2610 | 2.24 | 2.27  | 10.96 | 2.30  | tr Q3UZ63 Q3UZ63_MOUSE         | zf-CCCH_3 domain-containing protein (Fragment) OS=Mus musculus OX=10090 GN=Zc3h11a PE=2 SV=1                               | MOUSE | 1 |
| 2611 | 2.24 | 2.27  | 11.20 | 3.04  | tr Q91XI2 Q91XI2_MOUSE         | Catalase OS=Mus musculus OX=10090 GN=Cat PE=2 SV=1                                                                         | MOUSE | 1 |
| 2612 | 2.24 | 2.27  | 28.65 | 11.80 | sp P49817 CAV1_MOUSE           | Caveolin-1 OS=Mus musculus OX=10090 GN=Cav1 PE=1 SV=1                                                                      | MOUSE | 1 |
| 2613 | 2.24 | 2.27  | 12.87 | 9.41  | tr A0A0A6YY12 A0A0A6YY12_MOUSE | Delta(14)-sterol reductase LBR (Fragment) OS=Mus musculus OX=10090 GN=Lbr PE=1 SV=1                                        | MOUSE | 1 |
| 2614 | 2.22 | 2.27  | 10.86 | 3.09  | tr F6V2U0 F6V2U0_MOUSE         | Phosphatidylinositol-3,4-bisphosphate 4-phosphatase OS=Mus musculus OX=10090 GN=Inpp4a PE=1 SV=1                           | MOUSE | 2 |
| 2615 | 2.22 | 2.24  | 7.21  | 1.84  | tr Q3UDU6 Q3UDU6_MOUSE         | Rab-GAP TBC domain-containing protein OS=Mus musculus OX=10090 GN=Tbc1d17 PE=2 SV=1                                        | MOUSE | 1 |
| 2616 | 2.21 | 2.3   | 8.10  | 4.98  | sp O54851 CXD2_MOUSE           | Gap junction delta-2 protein OS=Mus musculus OX=10090 GN=Gjd2 PE=1 SV=2                                                    | MOUSE | 2 |
| 2617 | 2.21 | 2.24  | 17.19 | 2.81  | tr Q8BHC2 Q8BHC2_MOUSE         | IST1 homolog OS=Mus musculus OX=10090 GN=Ist1 PE=2 SV=1                                                                    | MOUSE | 1 |
| 2618 | 2.21 | 2.23  | 5.34  | 1.01  | tr B2RRE0 B2RRE0_MOUSE         | A kinase (PRKA) anchor protein (Gravin) 12 OS=Mus musculus OX=10090 GN=Akap12 PE=2 SV=1                                    | MOUSE | 1 |
| 2619 | 2.21 | 2.23  | 7.96  | 3.98  | tr Q14AZ9 Q14AZ9_MOUSE         | Zinc binding alcohol dehydrogenase, domain containing 2 OS=Mus musculus OX=10090 GN=Zadh2 PE=1 SV=1                        | MOUSE | 1 |
| 2620 | 2.19 | 8.4   | 65.56 | 38.89 | tr A0A338P6P7 A0A338P6P7_MOUSE | Protein kinase C and casein kinase substrate in neurons protein 2 (Fragment) OS=Mus musculus OX=10090 GN=Pacsin2 PE=1 SV=1 | MOUSE | 5 |
| 2621 | 2.19 | 2.21  | 19.91 | 3.36  | sp Q8CI32 BAG5_MOUSE           | BAG family molecular chaperone regulator 5 OS=Mus musculus OX=10090 GN=Bag5 PE=1 SV=1                                      | MOUSE | 1 |
| 2622 | 2.19 | 2.21  | 11.23 | 1.60  | tr Q3TV20 Q3TV20_MOUSE         | Asparagine synthetase [glutamine-hydrolyzing] OS=Mus musculus OX=10090 GN=Asns PE=2 SV=1                                   | MOUSE | 1 |
| 2623 | 2.18 | 2.31  | 25.12 | 11.11 | sp Q8BR63 F177A_MOUSE          | Protein FAM177A1 OS=Mus musculus OX=10090 GN=Fam177a1 PE=1 SV=1                                                            | MOUSE | 2 |
| 2624 | 2.18 | 2.2   | 15.92 | 7.35  | tr Q542B0 Q542B0_MOUSE         | Uncharacterized protein OS=Mus musculus OX=10090 GN=Exosc4 PE=1 SV=1                                                       | MOUSE | 1 |
| 2625 | 2.17 | 13.18 | 29.48 | 15.54 | tr Q3T9A1 Q3T9A1_MOUSE         | Dynamin-type G domain-containing protein (Fragment) OS=Mus musculus OX=10090 GN=Ehd1 PE=2 SV=1                             | MOUSE | 8 |

|      |      |       |       |       |                                |                                                                                                                    |       |   |
|------|------|-------|-------|-------|--------------------------------|--------------------------------------------------------------------------------------------------------------------|-------|---|
| 2626 | 2.17 | 2.51  | 26.01 | 8.09  | sp Q9D1H6 NDUF4_MOUSE          | NADH dehydrogenase [ubiquinone] 1 alpha subcomplex assembly factor 4 OS=Mus musculus OX=10090 GN=Ndufaf4 PE=1 SV=1 | MOUSE | 1 |
| 2627 | 2.17 | 2.29  | 21.24 | 5.70  | sp Q8BTU1 CFA20_MOUSE          | Cilia- and flagella-associated protein 20 OS=Mus musculus OX=10090 GN=Cfap20 PE=1 SV=1                             | MOUSE | 1 |
| 2628 | 2.17 | 2.28  | 8.52  | 2.26  | sp Q8K0D5 EFGM_MOUSE           | Elongation factor G, mitochondrial OS=Mus musculus OX=10090 GN=Gfm1 PE=1 SV=1                                      | MOUSE | 2 |
| 2629 | 2.17 | 2.19  | 18.22 | 10.22 | tr Q3U5M2 Q3U5M2_MOUSE         | Pre-mRNA-splicing factor SPF27 OS=Mus musculus OX=10090 GN=Bcas2 PE=2 SV=1                                         | MOUSE | 1 |
| 2630 | 2.16 | 10.41 | 18.21 | 13.06 | tr Q66K07 Q66K07_MOUSE         | Ubqln1 protein OS=Mus musculus OX=10090 GN=Ubqln1 PE=2 SV=1                                                        | MOUSE | 5 |
| 2631 | 2.16 | 2.27  | 7.46  | 0.78  | sp P01027 CO3_MOUSE            | Complement C3 OS=Mus musculus OX=10090 GN=C3 PE=1 SV=3                                                             | MOUSE | 1 |
| 2632 | 2.16 | 2.18  | 15.14 | 9.96  | tr D3YY42 D3YY42_MOUSE         | Protein YIF1B OS=Mus musculus OX=10090 GN=Yif1b PE=1 SV=1                                                          | MOUSE | 1 |
| 2633 | 2.16 | 2.17  | 8.23  | 2.13  | tr A2AMH5 A2AMH5_MOUSE         | Choline transporter-like protein 1 OS=Mus musculus OX=10090 GN=Slc44a1 PE=1 SV=1                                   | MOUSE | 1 |
| 2634 | 2.15 | 2.3   | 25.42 | 8.33  | tr A0A0R4J018 A0A0R4J018_MOUSE | Thiopurine S-methyltransferase OS=Mus musculus OX=10090 GN=Tpmt PE=1 SV=1                                          | MOUSE | 2 |
| 2635 | 2.15 | 2.16  | 21.20 | 5.07  | tr Q3UTB8 Q3UTB8_MOUSE         | GrpE protein homolog OS=Mus musculus OX=10090 GN=Grpel1 PE=2 SV=1                                                  | MOUSE | 1 |
| 2636 | 2.15 | 2.16  | 7.72  | 2.03  | sp Q32M02 FSCN2_MOUSE          | Fascin-2 OS=Mus musculus OX=10090 GN=Fscn2 PE=2 SV=1                                                               | MOUSE | 1 |
| 2637 | 2.14 | 2.26  | 23.49 | 15.10 | sp Q9EQ06 DHB11_MOUSE          | Estradiol 17-beta-dehydrogenase 11 OS=Mus musculus OX=10090 GN=Hsd17b11 PE=1 SV=1                                  | MOUSE | 2 |
| 2638 | 2.14 | 2.24  | 13.75 | 3.09  | sp P28651 CAH8_MOUSE           | Carbonic anhydrase-related protein OS=Mus musculus OX=10090 GN=Ca8 PE=1 SV=5                                       | MOUSE | 1 |
| 2639 | 2.14 | 2.16  | 6.07  | 1.93  | sp Q5U3K5 RABL6_MOUSE          | Rab-like protein 6 OS=Mus musculus OX=10090 GN=Rabl6 PE=1 SV=2                                                     | MOUSE | 1 |
| 2640 | 2.14 | 2.16  | 8.50  | 2.36  | sp Q8R0H9 GGA1_MOUSE           | ADP-ribosylation factor-binding protein GGA1 OS=Mus musculus OX=10090 GN=Gga1 PE=1 SV=1                            | MOUSE | 1 |
| 2641 | 2.14 | 2.16  | 4.88  | 2.55  | sp Q8BM72 HSP13_MOUSE          | Heat shock 70 kDa protein 13 OS=Mus musculus OX=10090 GN=Hspa13 PE=1 SV=1                                          | MOUSE | 1 |

|      |      |      |       |       |                         |                                                                                            |       |   |
|------|------|------|-------|-------|-------------------------|--------------------------------------------------------------------------------------------|-------|---|
| 2642 | 2.13 | 2.36 | 7.37  | 1.65  | tr Q3TR28 Q3TR28_MOUSE  | Uncharacterized protein OS=Mus musculus OX=10090 GN=Trim9 PE=2 SV=1                        | MOUSE | 1 |
| 2643 | 2.13 | 2.15 | 19.50 | 7.45  | sp Q9D7A8 ARMC1_MOUSE   | Armadillo repeat-containing protein 1 OS=Mus musculus OX=10090 GN=Armc1 PE=1 SV=1          | MOUSE | 1 |
| 2644 | 2.13 | 2.14 | 14.06 | 2.54  | tr E9Q3M0 E9Q3M0_MOUSE  | Mothers against decapentaplegic homolog OS=Mus musculus OX=10090 GN=Smad2 PE=1 SV=1        | MOUSE | 1 |
| 2645 | 2.13 | 2.14 | 11.74 | 8.50  | tr Q9D7Y7 Q9D7Y7_MOUSE  | Peptidase S1 domain-containing protein OS=Mus musculus OX=10090 GN=2210010C04Rik PE=2 SV=1 | MOUSE | 4 |
| 2646 | 2.12 | 6.19 | 10.31 | 5.42  | tr Q08EK5 Q08EK5_MOUSE  | Keratin 77 OS=Mus musculus OX=10090 GN=Krt77 PE=1 SV=1                                     | MOUSE | 6 |
| 2647 | 2.12 | 5.73 | 13.25 | 7.92  | sp Q9DBS5 KLC4_MOUSE    | Kinesin light chain 4 OS=Mus musculus OX=10090 GN=Klc4 PE=1 SV=1                           | MOUSE | 3 |
| 2648 | 2.12 | 3.21 | 14.44 | 8.30  | sp P70677 CASP3_MOUSE   | Caspase-3 OS=Mus musculus OX=10090 GN=Casp3 PE=1 SV=1                                      | MOUSE | 2 |
| 2649 | 2.12 | 3.01 | 11.16 | 11.16 | tr A2A6M1 A2A6M1_MOUSE  | Vacuolar-sorting protein SNF8 OS=Mus musculus OX=10090 GN=Snf8 PE=1 SV=1                   | MOUSE | 2 |
| 2650 | 2.12 | 2.21 | 6.80  | 5.44  | sp Q99JP7 GGT7_MOUSE    | Glutathione hydrolase 7 OS=Mus musculus OX=10090 GN=Ggt7 PE=1 SV=2                         | MOUSE | 2 |
| 2651 | 2.12 | 2.15 | 20.68 | 5.06  | tr Q3U7F6 Q3U7F6_MOUSE  | Uncharacterized protein OS=Mus musculus OX=10090 GN=Zfp422 PE=2 SV=1                       | MOUSE | 1 |
| 2652 | 2.12 | 2.13 | 45.45 | 16.53 | sp P60840 ENSA_MOUSE    | Alpha-endosulfine OS=Mus musculus OX=10090 GN=Ensa PE=1 SV=1                               | MOUSE | 2 |
| 2653 | 2.12 | 2.13 | 7.14  | 5.13  | tr B1AU76 B1AU76_MOUSE  | Nuclear autoantigenic sperm protein OS=Mus musculus OX=10090 GN=Nasp PE=1 SV=1             | MOUSE | 1 |
| 2654 | 2.11 | 2.74 | 25.34 | 10.27 | tr H3BL23 H3BL23_MOUSE  | Ubiquitin-conjugating enzyme E2 E2 (Fragment) OS=Mus musculus OX=10090 GN=Ube2e2 PE=1 SV=1 | MOUSE | 2 |
| 2655 | 2.11 | 2.58 | 32.76 | 24.14 | tr Q8BM48 Q8BM48_MOUSE  | Microsomal signal peptidase 21 kDa subunit OS=Mus musculus OX=10090 GN=Sec11c PE=2 SV=1    | MOUSE | 2 |
| 2656 | 2.11 | 2.24 | 6.50  | 0.97  | sp Q6KCD5-2 NIPBL_MOUSE | Isoform 2 of Nipped-B-like protein OS=Mus musculus OX=10090 GN=Nipbl                       | MOUSE | 2 |
| 2657 | 2.11 | 2.23 | 4.94  | 1.11  | tr F8WIA1 F8WIA1_MOUSE  | CAP-Gly domain-containing linker protein 1 OS=Mus musculus OX=10090 GN=Clip1 PE=1 SV=1     | MOUSE | 1 |
| 2658 | 2.11 | 2.23 | 11.71 | 3.10  | sp Q8K268 ABCF3_MOUSE   | ATP-binding cassette sub-family F member 3 OS=Mus musculus OX=10090 GN=Abcf3 PE=1 SV=1     | MOUSE | 1 |

|      |      |       |       |       |                        |                                                                                                                |       |   |
|------|------|-------|-------|-------|------------------------|----------------------------------------------------------------------------------------------------------------|-------|---|
| 2659 | 2.11 | 2.17  | 33.95 | 14.20 | tr D3YWI4 D3YWI4_MOUSE | Protein Mpv17 OS=Mus musculus OX=10090 GN=Mpv17 PE=1 SV=1                                                      | MOUSE | 1 |
| 2660 | 2.11 | 2.12  | 8.23  | 2.50  | tr Q3UGN6 Q3UGN6_MOUSE | 3-phosphoinositide-dependent protein kinase 1 OS=Mus musculus OX=10090 GN=Pdpk1 PE=2 SV=1                      | MOUSE | 1 |
| 2661 | 2.1  | 2.52  | 5.94  | 0.91  | tr A2A485 A2A485_MOUSE | Zinc finger, MYND-type-containing 8 OS=Mus musculus OX=10090 GN=Zmynd8 PE=1 SV=1                               | MOUSE | 1 |
| 2662 | 2.1  | 2.36  | 17.74 | 3.98  | sp P40336 VP26A_MOUSE  | Vacuolar protein sorting-associated protein 26A OS=Mus musculus OX=10090 GN=Vps26a PE=1 SV=1                   | MOUSE | 1 |
| 2663 | 2.1  | 2.26  | 7.78  | 2.38  | tr Q6PGJ3 Q6PGJ3_MOUSE | L1 cell adhesion molecule OS=Mus musculus OX=10090 GN=L1cam PE=1 SV=1                                          | MOUSE | 2 |
| 2664 | 2.1  | 2.12  | 6.10  | 0.88  | sp P10493 NID1_MOUSE   | Nidogen-1 OS=Mus musculus OX=10090 GN=Nid1 PE=1 SV=2                                                           | MOUSE | 1 |
| 2665 | 2.1  | 2.11  | 5.08  | 3.29  | tr Q8BMS7 Q8BMS7_MOUSE | Calcium-transporting ATPase OS=Mus musculus OX=10090 GN=Atp2c1 PE=1 SV=1                                       | MOUSE | 2 |
| 2666 | 2.09 | 12.82 | 16.23 | 8.68  | sp Q99LG2 TNPO2_MOUSE  | Transportin-2 OS=Mus musculus OX=10090 GN=Tnp2 PE=1 SV=1                                                       | MOUSE | 7 |
| 2667 | 2.09 | 3.17  | 26.15 | 26.15 | sp Q9D0R8 LSM12_MOUSE  | Protein LSM12 homolog OS=Mus musculus OX=10090 GN=Lsm12 PE=1 SV=1                                              | MOUSE | 3 |
| 2668 | 2.09 | 2.25  | 9.14  | 4.66  | tr Z4YJT3 Z4YJT3_MOUSE | La-related protein 1 OS=Mus musculus OX=10090 GN=Larp1 PE=1 SV=1                                               | MOUSE | 3 |
| 2669 | 2.09 | 2.24  | 22.03 | 7.34  | sp Q62086 PON2_MOUSE   | Serum paraoxonase/arylesterase 2 OS=Mus musculus OX=10090 GN=Pon2 PE=1 SV=2                                    | MOUSE | 2 |
| 2670 | 2.09 | 2.11  | 19.83 | 3.03  | tr D3Z6W2 D3Z6W2_MOUSE | Tyrosine-protein phosphatase non-receptor type OS=Mus musculus OX=10090 GN=Ptpn2 PE=1 SV=1                     | MOUSE | 1 |
| 2671 | 2.09 | 2.1   | 4.93  | 1.13  | tr B2RWW1 B2RWW1_MOUSE | Microtubule-associated protein 1S OS=Mus musculus OX=10090 GN=Map1s PE=2 SV=1                                  | MOUSE | 1 |
| 2672 | 2.08 | 13.14 | 56.45 | 50.54 | sp Q8VEH3 ARL8A_MOUSE  | ADP-ribosylation factor-like protein 8A OS=Mus musculus OX=10090 GN=Arl8a PE=1 SV=1                            | MOUSE | 8 |
| 2673 | 2.08 | 4.35  | 9.29  | 2.83  | tr Q4LG64 Q4LG64_MOUSE | Glutamate receptor OS=Mus musculus OX=10090 GN=Gria2 PE=2 SV=1                                                 | MOUSE | 3 |
| 2674 | 2.08 | 2.96  | 9.34  | 2.09  | tr F8VQE9 F8VQE9_MOUSE | Arf-GAP with GTPase, ANK repeat and PH domain-containing protein 3 OS=Mus musculus OX=10090 GN=Agap3 PE=1 SV=1 | MOUSE | 2 |

|      |      |      |       |       |                                |                                                                                                      |       |   |
|------|------|------|-------|-------|--------------------------------|------------------------------------------------------------------------------------------------------|-------|---|
| 2675 | 2.08 | 2.09 | 6.59  | 1.60  | tr E9PW03 E9PW03_MOUSE         | Glycosylphosphatidylinositol anchor attachment 1 protein OS=Mus musculus OX=10090 GN=Gpaa1 PE=1 SV=1 | MOUSE | 1 |
| 2676 | 2.07 | 9.45 | 19.01 | 14.32 | tr Q9CZS7 Q9CZS7_MOUSE         | PIPK domain-containing protein OS=Mus musculus OX=10090 GN=Pip4k2a PE=2 SV=1                         | MOUSE | 6 |
| 2677 | 2.07 | 4.13 | 24.75 | 16.16 | sp Q91Z61 DIRA1_MOUSE          | GTP-binding protein Di-Ras1 OS=Mus musculus OX=10090 GN=Diras1 PE=1 SV=1                             | MOUSE | 3 |
| 2678 | 2.07 | 2.2  | 35.06 | 13.85 | tr Q9Z2P7 Q9Z2P7_MOUSE         | GES30 OS=Mus musculus OX=10090 GN=Vti1b PE=2 SV=1                                                    | MOUSE | 2 |
| 2679 | 2.07 | 2.19 | 6.01  | 1.91  | tr A2AVJ7 A2AVJ7_MOUSE         | Ribosome-binding protein 1 OS=Mus musculus OX=10090 GN=Rrbp1 PE=1 SV=1                               | MOUSE | 2 |
| 2680 | 2.07 | 2.18 | 20.45 | 4.87  | tr Z4YKT6 Z4YKT6_MOUSE         | Dehydrogenase/reductase SDR family member 7B OS=Mus musculus OX=10090 GN=Dhrs7b PE=1 SV=1            | MOUSE | 1 |
| 2681 | 2.07 | 2.12 | 3.77  | 1.15  | tr Q4VA02 Q4VA02_MOUSE         | Rp1 protein (Fragment) OS=Mus musculus OX=10090 GN=Rp1 PE=2 SV=1                                     | MOUSE | 1 |
| 2682 | 2.07 | 2.11 | 16.81 | 3.78  | tr A2VCP7 A2VCP7_MOUSE         | Proteasome inhibitor PI31 subunit (Fragment) OS=Mus musculus OX=10090 GN=Psmf1 PE=2 SV=1             | MOUSE | 1 |
| 2683 | 2.07 | 2.09 | 13.11 | 5.57  | tr Q3UZR8 Q3UZR8_MOUSE         | Translation initiation factor eIF-2B subunit alpha OS=Mus musculus OX=10090 GN=Eif2b1 PE=1 SV=1      | MOUSE | 1 |
| 2684 | 2.07 | 2.08 | 13.00 | 2.50  | tr A0A1L1STF0 A0A1L1STF0_MOUSE | Ubiquitin carboxyl-terminal hydrolase OS=Mus musculus OX=10090 GN=Mindy2 PE=1 SV=1                   | MOUSE | 1 |
| 2685 | 2.07 | 2.08 | 8.06  | 2.02  | tr F6T1Y2 F6T1Y2_MOUSE         | Rho GTPase-activating protein 44 (Fragment) OS=Mus musculus OX=10090 GN=Arhgap44 PE=1 SV=1           | MOUSE | 1 |
| 2686 | 2.07 | 2.08 | 4.69  | 2.96  | tr A0A1L1SS47 A0A1L1SS47_MOUSE | CCR4-NOT transcription complex subunit 10 OS=Mus musculus OX=10090 GN=Cnot10 PE=1 SV=1               | MOUSE | 1 |
| 2687 | 2.07 | 2.08 | 23.96 | 16.67 | sp Q6ZWM4 LSM8_MOUSE           | U6 snRNA-associated Sm-like protein LSm8 OS=Mus musculus OX=10090 GN=Lsm8 PE=1 SV=3                  | MOUSE | 1 |
| 2688 | 2.07 | 2.07 | 33.33 | 9.88  | tr A0A0R4J0K1 A0A0R4J0K1_MOUSE | Selenoprotein F OS=Mus musculus OX=10090 GN=Selenof PE=1 SV=1                                        | MOUSE | 1 |
| 2689 | 2.06 | 2.45 | 51.69 | 51.69 | sp P99028 QCR6_MOUSE           | Cytochrome b-c1 complex subunit 6, mitochondrial OS=Mus musculus OX=10090 GN=Uqcrh PE=1 SV=2         | MOUSE | 3 |
| 2690 | 2.06 | 2.12 | 7.96  | 3.10  | sp O55222 ILK_MOUSE            | Integrin-linked protein kinase OS=Mus musculus OX=10090 GN=Ilk PE=1 SV=2                             | MOUSE | 1 |
| 2691 | 2.06 | 2.08 | 13.94 | 4.81  | tr Q922W2 Q922W2_MOUSE         | Qrich1 protein OS=Mus musculus OX=10090 GN=Qrich1 PE=2 SV=1                                          | MOUSE | 1 |

|      |      |       |       |       |                                |                                                                                                |       |    |
|------|------|-------|-------|-------|--------------------------------|------------------------------------------------------------------------------------------------|-------|----|
| 2692 | 2.06 | 2.07  | 42.57 | 18.24 | tr Q8R2K3 Q8R2K3_MOUSE         | Single-stranded DNA-binding protein, mitochondrial OS=Mus musculus OX=10090 GN=Ssbp1 PE=1 SV=1 | MOUSE | 2  |
| 2693 | 2.06 | 2.07  | 11.53 | 2.88  | sp Q9EPK2 XRP2_MOUSE           | Protein XRP2 OS=Mus musculus OX=10090 GN=Rp2 PE=1 SV=3                                         | MOUSE | 1  |
| 2694 | 2.05 | 52.71 | 50.31 | 40.90 | tr A0A3B2WBE1 A0A3B2WBE1_MOUSE | Band 4.1-like protein 3 (Fragment) OS=Mus musculus OX=10090 GN=Epb4113 PE=1 SV=1               | MOUSE | 28 |
| 2695 | 2.05 | 8.17  | 36.70 | 21.10 | tr Q6PJ91 Q6PJ91_MOUSE         | Glutathione transferase OS=Mus musculus OX=10090 GN=Gstm7 PE=2 SV=1                            | MOUSE | 4  |
| 2696 | 2.05 | 4.13  | 8.43  | 3.03  | sp Q8JZW4 CPNE5_MOUSE          | Copine-5 OS=Mus musculus OX=10090 GN=Cpne5 PE=1 SV=1                                           | MOUSE | 3  |
| 2697 | 2.05 | 2.23  | 5.32  | 0.94  | tr Q3UHQ5 Q3UHQ5_MOUSE         | TOG domain-containing protein OS=Mus musculus OX=10090 GN=Gcn1 PE=2 SV=1                       | MOUSE | 2  |
| 2698 | 2.05 | 2.06  | 7.49  | 2.89  | tr D3YWR0 D3YWR0_MOUSE         | Protein Aster-B OS=Mus musculus OX=10090 GN=Gramd1b PE=1 SV=2                                  | MOUSE | 1  |
| 2699 | 2.04 | 39.56 | 57.41 | 35.85 | tr V9GZG5 V9GZG5_MOUSE         | Palmitoyltransferase GLUL OS=Mus musculus OX=10090 PE=3 SV=1                                   | MOUSE | 38 |
| 2700 | 2.04 | 9.66  | 16.54 | 9.66  | tr Q80XK0 Q80XK0_MOUSE         | Serine/threonine-protein phosphatase (Fragment) OS=Mus musculus OX=10090 GN=Ppp3cc PE=2 SV=1   | MOUSE | 5  |
| 2701 | 2.04 | 2.17  | 14.86 | 2.39  | sp Q0VBL3 RBM15_MOUSE          | RNA-binding protein 15 OS=Mus musculus OX=10090 GN=Rbm15 PE=1 SV=1                             | MOUSE | 1  |
| 2702 | 2.04 | 2.15  | 8.91  | 4.93  | tr Q3U0M8 Q3U0M8_MOUSE         | ElaC homolog protein 2 OS=Mus musculus OX=10090 GN=Elac2 PE=2 SV=1                             | MOUSE | 2  |
| 2703 | 2.04 | 2.15  | 3.97  | 3.97  | tr B2RWR2 B2RWR2_MOUSE         | Lpcat2 protein OS=Mus musculus OX=10090 GN=Lpcat2 PE=2 SV=1                                    | MOUSE | 2  |
| 2704 | 2.04 | 2.05  | 12.27 | 4.53  | tr Q7TT04 Q7TT04_MOUSE         | Nup43 protein (Fragment) OS=Mus musculus OX=10090 GN=Nup43 PE=2 SV=2                           | MOUSE | 1  |
| 2705 | 2.04 | 2.04  | 10.80 | 2.81  | tr A0A2R8VHX0 A0A2R8VHX0_MOUSE | Cysteine sulfinic acid decarboxylase OS=Mus musculus OX=10090 GN=Csad PE=1 SV=1                | MOUSE | 1  |
| 2706 | 2.04 | 2.04  | 7.01  | 1.35  | tr Q5QNU0 Q5QNU0_MOUSE         | Uncharacterized protein OS=Mus musculus OX=10090 GN=Nup88 PE=2 SV=1                            | MOUSE | 1  |
| 2707 | 2.03 | 2.11  | 15.85 | 4.61  | tr Q543U1 Q543U1_MOUSE         | Hist_deacetyl domain-containing protein OS=Mus musculus OX=10090 GN=Hdac11 PE=1 SV=1           | MOUSE | 1  |
| 2708 | 2.03 | 2.04  | 14.26 | 2.04  | sp Q9Z0E6 GBP2_MOUSE           | Guanylate-binding protein 2 OS=Mus musculus OX=10090 GN=Gbp2 PE=1 SV=1                         | MOUSE | 1  |

|      |      |      |       |       |                          |                                                                                                                                                 |       |   |
|------|------|------|-------|-------|--------------------------|-------------------------------------------------------------------------------------------------------------------------------------------------|-------|---|
| 2709 | 2.03 | 2.04 | 15.79 | 5.54  | tr Q99L41 Q99L41_MOUSE   | Hydroxymethylbilane synthase OS=Mus musculus<br>OX=10090 GN=Hmbs PE=2 SV=1                                                                      | MOUSE | 1 |
| 2710 | 2.03 | 2.04 | 7.88  | 3.64  | tr Q8R0M2 Q8R0M2_MOUSE   | UTP--glucose-1-phosphate uridylyltransferase (Fragment)<br>OS=Mus musculus OX=10090 GN=Ugp2 PE=2 SV=1                                           | MOUSE | 2 |
| 2711 | 2.03 | 2.03 | 3.97  | 1.02  | sp Q8VI75 IPO4_MOUSE     | Importin-4 OS=Mus musculus OX=10090 GN=Ipo4 PE=1<br>SV=1                                                                                        | MOUSE | 1 |
| 2712 | 2.03 | 2.03 | 3.57  | 1.13  | sp P98200 AT8A2_MOUSE    | Phospholipid-transporting ATPase IB OS=Mus musculus<br>OX=10090 GN=Atp8a2 PE=1 SV=1                                                             | MOUSE | 1 |
| 2713 | 2.03 | 2.03 | 22.76 | 6.90  | tr D3YYL1 D3YYL1_MOUSE   | B-cell CLL/lymphoma 7 protein family member B OS=Mus<br>musculus OX=10090 GN=Bd7b PE=1 SV=1                                                     | MOUSE | 1 |
| 2714 | 2.03 | 2.03 | 6.03  | 3.29  | tr Q3TDP3 Q3TDP3_MOUSE   | PlsC domain-containing protein OS=Mus musculus<br>OX=10090 GN=Agpat5 PE=2 SV=1                                                                  | MOUSE | 1 |
| 2715 | 2.03 | 2.03 | 9.38  | 6.25  | sp Q9WV35 ABEC2_MOUSE    | C->U-editing enzyme APOBEC-2 OS=Mus musculus<br>OX=10090 GN=Apobec2 PE=1 SV=1                                                                   | MOUSE | 1 |
| 2716 | 2.02 | 4.69 | 12.16 | 10.86 | tr Q3TYJ3 Q3TYJ3_MOUSE   | Cytoplasmic dynein 1 intermediate chain 1 OS=Mus<br>musculus OX=10090 GN=Dync1i1 PE=1 SV=1                                                      | MOUSE | 4 |
| 2717 | 2.02 | 2.11 | 1.79  | 0.68  | tr E9Q3T3 E9Q3T3_MOUSE   | Kinesin-like protein KIF14 OS=Mus musculus OX=10090<br>GN=Kif14 PE=1 SV=1                                                                       | MOUSE | 1 |
| 2718 | 2.02 | 2.04 | 3.73  | 0.77  | tr E9PWR4 E9PWR4_MOUSE   | Disco-interacting protein 2 homolog C OS=Mus musculus<br>OX=10090 GN=Dip2c PE=1 SV=1                                                            | MOUSE | 1 |
| 2719 | 2.02 | 2.04 | 4.66  | 2.10  | tr Q6A0A4 Q6A0A4_MOUSE   | MKIAA0205 protein (Fragment) OS=Mus musculus<br>OX=10090 GN=Lpgat1 PE=2 SV=1                                                                    | MOUSE | 1 |
| 2720 | 2.02 | 2.03 | 14.75 | 3.28  | sp Q9D1E6 TBCB_MOUSE     | Tubulin-folding cofactor B OS=Mus musculus OX=10090<br>GN=Tbcb PE=1 SV=2                                                                        | MOUSE | 1 |
| 2721 | 2.02 | 2.03 | 6.28  | 2.76  | tr D3YWC9 D3YWC9_MOUSE   | Protein MTSS 2 OS=Mus musculus OX=10090 GN=Mtss2<br>PE=1 SV=1                                                                                   | MOUSE | 1 |
| 2722 | 2.02 | 2.03 | 8.63  | 3.58  | tr Q543Z1 Q543Z1_MOUSE   | Carboxylic ester hydrolase OS=Mus musculus OX=10090<br>GN=Ache PE=2 SV=1                                                                        | MOUSE | 1 |
| 2723 | 2.02 | 2.03 | 5.18  | 3.75  | tr J3QNNQ8 J3QNNQ8_MOUSE | Leucine-rich repeat, immunoglobulin-like domain and<br>transmembrane domain-containing protein 3 OS=Mus<br>musculus OX=10090 GN=Lrit3 PE=4 SV=1 | MOUSE | 1 |
| 2724 | 2.02 | 2.02 | 13.79 | 8.97  | tr Q4KL41 Q4KL41_MOUSE   | Translocase of outer mitochondrial membrane 20 homolog<br>(Yeast) OS=Mus musculus OX=10090 GN=Tom20 PE=1<br>SV=1                                | MOUSE | 1 |



|      |      |       |       |       |                                |                                                                                                                          |       |    |
|------|------|-------|-------|-------|--------------------------------|--------------------------------------------------------------------------------------------------------------------------|-------|----|
| 2725 | 2.02 | 2.02  | 2.34  | 1.45  | tr A0A2I3BQJ1 A0A2I3BQJ1_MOUSE | Serine/threonine-protein phosphatase 6 regulatory ankyrin repeat subunit A OS=Mus musculus OX=10090 GN=Ankrd28 PE=1 SV=1 | MOUSE | 1  |
| 2726 | 2.02 | 2.02  | 8.73  | 4.36  | sp Q9CRA5 GOLP3_MOUSE          | Golgi phosphoprotein 3 OS=Mus musculus OX=10090 GN=Golph3 PE=1 SV=1                                                      | MOUSE | 1  |
| 2727 | 2.02 | 2.02  | 14.34 | 9.84  | sp Q8C1S0 MED19_MOUSE          | Mediator of RNA polymerase II transcription subunit 19 OS=Mus musculus OX=10090 GN=Med19 PE=1 SV=1                       | MOUSE | 1  |
| 2728 | 2.01 | 33.85 | 77.67 | 62.62 | sp P60879-2 SNP25_MOUSE        | Isoform 2 of Synaptosomal-associated protein 25 OS=Mus musculus OX=10090 GN=Snap25                                       | MOUSE | 22 |
| 2729 | 2.01 | 11.95 | 48.40 | 30.59 | tr Q0PD62 Q0PD62_MOUSE         | Ras-related protein Rab-3 OS=Mus musculus OX=10090 GN=Rab3b PE=1 SV=1                                                    | MOUSE | 10 |
| 2730 | 2.01 | 10.71 | 12.17 | 7.59  | tr E9PXY1 E9PXY1_MOUSE         | Cullin-4B OS=Mus musculus OX=10090 GN=Cul4b PE=1 SV=2                                                                    | MOUSE | 6  |
| 2731 | 2.01 | 2.59  | 28.13 | 13.12 | tr M0QWC2 M0QWC2_MOUSE         | Microtubule-associated proteins 1A/1B light chain 3B OS=Mus musculus OX=10090 GN=Map1lc3b PE=1 SV=1                      | MOUSE | 2  |
| 2732 | 2.01 | 2.55  | 16.13 | 10.42 | tr Q9DB01 Q9DB01_MOUSE         | Uncharacterized protein OS=Mus musculus OX=10090 GN=Pcbp4 PE=2 SV=1                                                      | MOUSE | 4  |
| 2733 | 2.01 | 2.22  | 10.39 | 3.79  | tr Q3URI3 Q3URI3_MOUSE         | Phosphatidylinositol-3,4-bisphosphate 4-phosphatase (Fragment) OS=Mus musculus OX=10090 GN=Inpp4b PE=1 SV=1              | MOUSE | 2  |
| 2734 | 2.01 | 2.08  | 10.99 | 2.82  | tr Q3V1X4 Q3V1X4_MOUSE         | Uncharacterized protein OS=Mus musculus OX=10090 GN=Surf6 PE=2 SV=1                                                      | MOUSE | 1  |
| 2735 | 2.01 | 2.02  | 8.64  | 3.04  | tr E0CYH4 E0CYH4_MOUSE         | WD repeat-containing protein 26 (Fragment) OS=Mus musculus OX=10090 GN=Wdr26 PE=1 SV=1                                   | MOUSE | 1  |
| 2736 | 2.01 | 2.02  | 36.00 | 10.40 | sp Q9DCG9 TR112_MOUSE          | Multifunctional methyltransferase subunit TRM112-like protein OS=Mus musculus OX=10090 GN=Trmt112 PE=1 SV=1              | MOUSE | 2  |
| 2737 | 2.01 | 2.02  | 5.86  | 1.81  | sp Q9CXJ4 MITOS_MOUSE          | Mitochondrial potassium channel ATP-binding subunit OS=Mus musculus OX=10090 GN=Abcb8 PE=1 SV=1                          | MOUSE | 1  |
| 2738 | 2.01 | 2.02  | 18.50 | 5.91  | sp Q91WE2 PIP30_MOUSE          | PSME3-interacting protein OS=Mus musculus OX=10090 GN=Psme3ip1 PE=1 SV=1                                                 | MOUSE | 1  |
| 2739 | 2.01 | 2.02  | 4.23  | 1.33  | tr Q61213 Q61213_MOUSE         | Protease OS=Mus musculus OX=10090 GN=gag PE=2 SV=1                                                                       | MOUSE | 1  |

|      |      |       |       |       |                                |                                                                                                      |       |    |
|------|------|-------|-------|-------|--------------------------------|------------------------------------------------------------------------------------------------------|-------|----|
| 2740 | 2.01 | 2.02  | 23.53 | 8.24  | tr A0A1L1SU40 A0A1L1SU40_MOUSE | Choline transporter-like protein 2 (Fragment) OS=Mus musculus OX=10090 GN=Slc44a2 PE=1 SV=1          | MOUSE | 1  |
| 2741 | 2.01 | 2.01  | 6.25  | 2.39  | tr Q6ZQC2 Q6ZQC2_MOUSE         | MKIAA0410 protein (Fragment) OS=Mus musculus OX=10090 GN=mKIAA0410 PE=2 SV=1                         | MOUSE | 1  |
| 2742 | 2.01 | 2.01  | 5.77  | 1.75  | tr Q3UJN9 Q3UJN9_MOUSE         | Coilin OS=Mus musculus OX=10090 GN=Coil PE=2 SV=1                                                    | MOUSE | 1  |
| 2743 | 2.01 | 2.01  | 23.32 | 7.77  | tr Q3U8S0 Q3U8S0_MOUSE         | Adaptor-related protein complex 3, sigma 1 subunit OS=Mus musculus OX=10090 GN=Ap3s1 PE=1 SV=1       | MOUSE | 1  |
| 2744 | 2.01 | 2.01  | 59.26 | 17.28 | tr F8WH46 F8WH46_MOUSE         | RIKEN cDNA 0610010K14 gene OS=Mus musculus OX=10090 GN=0610010K14Rik PE=1 SV=1                       | MOUSE | 1  |
| 2745 | 2.01 | 2.01  | 8.76  | 4.68  | tr Q9EQC8 Q9EQC8_MOUSE         | Papillary Renal Cell carcinoma (Translocation-associated) OS=Mus musculus OX=10090 GN=Prcc PE=1 SV=1 | MOUSE | 1  |
| 2746 | 2.01 | 2.01  | 10.04 | 7.34  | tr Q3TAQ8 Q3TAQ8_MOUSE         | Phosphoglycerate mutase OS=Mus musculus OX=10090 GN=Bpgm PE=2 SV=1                                   | MOUSE | 1  |
| 2747 | 2.01 | 2.01  | 40.71 | 10.62 | tr G3UZA7 G3UZA7_MOUSE         | Small ubiquitin-related modifier OS=Mus musculus OX=10090 GN=Sumo3 PE=1 SV=1                         | MOUSE | 1  |
| 2748 | 2.01 | 2.01  | 11.48 | 8.13  | tr D3Z7W0 D3Z7W0_MOUSE         | Iron-sulfur cluster assembly enzyme ISCU, mitochondrial OS=Mus musculus OX=10090 GN=Iscu PE=1 SV=1   | MOUSE | 1  |
| 2749 | 2.01 | 2.01  | 20.22 | 9.55  | sp Q9CZH7 MXRA7_MOUSE          | Matrix-remodeling-associated protein 7 OS=Mus musculus OX=10090 GN=Mxra7 PE=1 SV=2                   | MOUSE | 1  |
| 2750 | 2.01 | 2.01  | 19.71 | 12.50 | sp Q8BVA2 TM222_MOUSE          | Transmembrane protein 222 OS=Mus musculus OX=10090 GN=Tmem222 PE=1 SV=1                              | MOUSE | 1  |
| 2751 | 2.01 | 2.01  | 8.25  | 3.44  | sp Q8BHE8 MAIP1_MOUSE          | m-AAA protease-interacting protein 1, mitochondrial OS=Mus musculus OX=10090 GN=Maip1 PE=1 SV=1      | MOUSE | 1  |
| 2752 | 2.01 | 2.01  | 66.67 | 44.05 | sp Q8BGH7 C42S2_MOUSE          | CDC42 small effector protein 2 OS=Mus musculus OX=10090 GN=Cdc42se2 PE=1 SV=1                        | MOUSE | 1  |
| 2753 | 2    | 96.32 | 52.09 | 44.09 | sp Q80TJ1-2 CAPS1_MOUSE        | Isoform 2 of Calcium-dependent secretion activator 1 OS=Mus musculus OX=10090 GN=Cadps               | MOUSE | 50 |
| 2754 | 2    | 77.47 | 52.59 | 50.35 | tr A0A0A6YY47 A0A0A6YY47_MOUSE | Neural cell adhesion molecule 1 OS=Mus musculus OX=10090 GN=Ncam1 PE=1 SV=1                          | MOUSE | 55 |
| 2755 | 2    | 70.31 | 55.08 | 52.65 | sp Q8BHN3 GANAB_MOUSE          | Neutral alpha-glucosidase AB OS=Mus musculus OX=10090 GN=Ganab PE=1 SV=1                             | MOUSE | 41 |
| 2756 | 2    | 61.18 | 43.26 | 34.16 | tr E9Q175 E9Q175_MOUSE         | Unconventional myosin-6 OS=Mus musculus OX=10090 GN=Myo6 PE=1 SV=1                                   | MOUSE | 32 |

|      |   |       |       |       |                         |                                                                                                                                       |       |    |
|------|---|-------|-------|-------|-------------------------|---------------------------------------------------------------------------------------------------------------------------------------|-------|----|
| 2757 | 2 | 58.15 | 66.29 | 63.78 | sp P61979-3 HNRPK_MOUSE | Isoform 3 of Heterogeneous nuclear ribonucleoprotein K<br>OS=Mus musculus OX=10090 GN=Hnrnpk                                          | MOUSE | 36 |
| 2758 | 2 | 47.14 | 55.56 | 48.76 | sp D3Z7P3-2 GLSK_MOUSE  | Isoform 2 of Glutaminase kidney isoform, mitochondrial<br>OS=Mus musculus OX=10090 GN=Gls                                             | MOUSE | 28 |
| 2759 | 2 | 35.22 | 54.43 | 44.65 | tr A2BI12 A2BI12_MOUSE  | PC4 and SFRS1-interacting protein OS=Mus musculus<br>OX=10090 GN=Psp1 PE=1 SV=1                                                       | MOUSE | 20 |
| 2760 | 2 | 26.51 | 62.99 | 62.99 | tr Q3UBN8 Q3UBN8_MOUSE  | Uncharacterized protein OS=Mus musculus OX=10090<br>GN=Bpnt1 PE=2 SV=1                                                                | MOUSE | 14 |
| 2761 | 2 | 25.96 | 63.16 | 55.26 | tr D3Z6G3 D3Z6G3_MOUSE  | Microtubule-associated protein RP/EB family member 3<br>OS=Mus musculus OX=10090 GN=Mapre3 PE=1 SV=1                                  | MOUSE | 15 |
| 2762 | 2 | 25.6  | 54.34 | 54.06 | tr Q8K3G7 Q8K3G7_MOUSE  | Reticulon OS=Mus musculus OX=10090 GN=Rtn4 PE=2<br>SV=1                                                                               | MOUSE | 13 |
| 2763 | 2 | 23.8  | 43.03 | 38.70 | tr Q6ZWM8 Q6ZWM8_MOUSE  | Serine/threonine-protein phosphatase OS=Mus musculus<br>OX=10090 GN=Ppp1cc PE=2 SV=1                                                  | MOUSE | 12 |
| 2764 | 2 | 22    | 55.99 | 55.34 | sp P62715 PP2AB_MOUSE   | Serine/threonine-protein phosphatase 2A catalytic subunit<br>beta isoform OS=Mus musculus OX=10090 GN=Ppp2cb<br>PE=1 SV=1             | MOUSE | 15 |
| 2765 | 2 | 15.08 | 46.13 | 33.87 | tr Q544I1 Q544I1_MOUSE  | N-myc downstream-regulated gene 3 protein OS=Mus<br>musculus OX=10090 GN=Ndr3 PE=1 SV=1                                               | MOUSE | 9  |
| 2766 | 2 | 8.94  | 42.77 | 42.77 | tr I1E4X7 I1E4X7_MOUSE  | Diphosphoinositol polyphosphate phosphohydrolase 1<br>OS=Mus musculus OX=10090 GN=Nudt3 PE=1 SV=1                                     | MOUSE | 5  |
| 2767 | 2 | 8.26  | 18.10 | 13.47 | sp Q925E7 2ABD_MOUSE    | Serine/threonine-protein phosphatase 2A 55 kDa<br>regulatory subunit B delta isoform OS=Mus musculus<br>OX=10090 GN=Ppp2r2d PE=1 SV=1 | MOUSE | 4  |
| 2768 | 2 | 7.3   | 10.72 | 8.50  | tr Q8C762 Q8C762_MOUSE  | Tyrosine-protein kinase OS=Mus musculus OX=10090<br>GN=Yes1 PE=2 SV=1                                                                 | MOUSE | 4  |
| 2769 | 2 | 7.22  | 33.33 | 33.33 | tr Q4FJR7 Q4FJR7_MOUSE  | Eukaryotic translation initiation factor 4C OS=Mus<br>musculus OX=10090 GN=Eif1a PE=2 SV=1                                            | MOUSE | 4  |
| 2770 | 2 | 6     | 35.42 | 34.38 | tr Q3TVP0 Q3TVP0_MOUSE  | Uncharacterized protein OS=Mus musculus OX=10090 PE=2<br>SV=1                                                                         | MOUSE | 3  |
| 2771 | 2 | 6     | 49.44 | 49.44 | sp P63168 DYL1_MOUSE    | Dynein light chain 1, cytoplasmic OS=Mus musculus<br>OX=10090 GN=Dynll1 PE=1 SV=1                                                     | MOUSE | 3  |
| 2772 | 2 | 4.53  | 22.63 | 20.00 | tr Q3UX06 Q3UX06_MOUSE  | Uncharacterized protein (Fragment) OS=Mus musculus<br>OX=10090 GN=Parp1 PE=2 SV=1                                                     | MOUSE | 3  |

|      |   |      |       |       |                                |                                                                                                                   |       |   |
|------|---|------|-------|-------|--------------------------------|-------------------------------------------------------------------------------------------------------------------|-------|---|
| 2773 | 2 | 4    | 23.17 | 10.57 | tr Q9Z1R9 Q9Z1R9_MOUSE         | Protease, serine 1 (trypsin 1) OS=Mus musculus OX=10090 GN=Prss1 PE=1 SV=1                                        | MOUSE | 6 |
| 2774 | 2 | 4    | 10.55 | 10.09 | tr Q549X4 Q549X4_MOUSE         | Small monomeric GTPase OS=Mus musculus OX=10090 GN=Rab27b PE=1 SV=1                                               | MOUSE | 2 |
| 2775 | 2 | 3.96 | 3.65  | 3.65  | tr E9QNA7 E9QNA7_MOUSE         | Sorbin and SH3 domain-containing protein 1 OS=Mus musculus OX=10090 GN=Sorbs1 PE=1 SV=1                           | MOUSE | 2 |
| 2776 | 2 | 3.8  | 6.06  | 6.06  | tr Q3UFG0 Q3UFG0_MOUSE         | Uncharacterized protein OS=Mus musculus OX=10090 GN=Emb PE=2 SV=1                                                 | MOUSE | 2 |
| 2777 | 2 | 3.14 | 27.55 | 25.51 | tr D3Z4G2 D3Z4G2_MOUSE         | Homeobox protein OTX2 (Fragment) OS=Mus musculus OX=10090 GN=Otx2 PE=1 SV=1                                       | MOUSE | 3 |
| 2778 | 2 | 2.07 | 11.05 | 11.05 | tr Q497V8 Q497V8_MOUSE         | 2310061I04Rik protein OS=Mus musculus OX=10090 GN=2310061I04Rik PE=2 SV=1                                         | MOUSE | 2 |
| 2779 | 2 | 2.03 | 5.97  | 2.10  | tr Q6P8N8 Q6P8N8_MOUSE         | ATP-dependent Clp protease ATP-binding subunit dpX-like, mitochondrial OS=Mus musculus OX=10090 GN=Clpx PE=1 SV=1 | MOUSE | 1 |
| 2780 | 2 | 2.03 | 2.21  | 0.65  | tr B9EIX2 B9EIX2_MOUSE         | AW555464 protein OS=Mus musculus OX=10090 GN=Cep170b PE=1 SV=1                                                    | MOUSE | 1 |
| 2781 | 2 | 2.02 | 36.90 | 28.57 | tr A0A3B2WBC6 A0A3B2WBC6_MOUSE | DNA-directed RNA polymerase II subunit GRINL1A OS=Mus musculus OX=10090 GN=Polr2m PE=4 SV=1                       | MOUSE | 1 |
| 2782 | 2 | 2.01 | 4.08  | 0.97  | sp Q9DBR7 MYPT1_MOUSE          | Protein phosphatase 1 regulatory subunit 12A OS=Mus musculus OX=10090 GN=Ppp1r12a PE=1 SV=2                       | MOUSE | 1 |
| 2783 | 2 | 2.01 | 12.65 | 3.34  | sp Q91WM2 HDHD5_MOUSE          | Haloacid dehalogenase-like hydrolase domain-containing 5 OS=Mus musculus OX=10090 GN=Hdhd5 PE=1 SV=1              | MOUSE | 1 |
| 2784 | 2 | 2.01 | 1.67  | 0.43  | tr A0A5F8MPX2 A0A5F8MPX2_MOUSE | Synaptotagmin-like protein 2 OS=Mus musculus OX=10090 GN=Sytl2 PE=1 SV=1                                          | MOUSE | 1 |
| 2785 | 2 | 2.01 | 6.43  | 4.83  | tr D3Z1C5 D3Z1C5_MOUSE         | LIM domain-binding protein 1 OS=Mus musculus OX=10090 GN=Ldb1 PE=1 SV=1                                           | MOUSE | 1 |
| 2786 | 2 | 2.01 | 34.02 | 27.84 | tr A0A1L1SQA2 A0A1L1SQA2_MOUSE | Predicted gene 9803 OS=Mus musculus OX=10090 GN=Gm9803 PE=1 SV=1                                                  | MOUSE | 1 |
| 2787 | 2 | 2.01 | 6.65  | 3.80  | sp Q9CWI3 BCCIP_MOUSE          | BRCA2 and CDKN1A-interacting protein OS=Mus musculus OX=10090 GN=Bccip PE=1 SV=1                                  | MOUSE | 1 |
| 2788 | 2 | 2.01 | 7.69  | 4.81  | sp Q8CJ61 CKLF4_MOUSE          | CKLF-like MARVEL transmembrane domain-containing protein 4 OS=Mus musculus OX=10090 GN=Cmtm4 PE=1 SV=1            | MOUSE | 1 |

|      |   |      |       |       |                                |                                                                                                      |       |   |
|------|---|------|-------|-------|--------------------------------|------------------------------------------------------------------------------------------------------|-------|---|
| 2789 | 2 | 2.01 | 16.45 | 9.21  | sp Q80Y14 GLRX5_MOUSE          | Glutaredoxin-related protein 5, mitochondrial OS=Mus musculus OX=10090 GN=Glr5 PE=1 SV=2             | MOUSE | 1 |
| 2790 | 2 | 2    | 7.94  | 4.11  | tr Q3U3B9 Q3U3B9_MOUSE         | BSD domain-containing protein OS=Mus musculus OX=10090 GN=Syap1 PE=2 SV=1                            | MOUSE | 1 |
| 2791 | 2 | 2    | 5.41  | 3.70  | tr A0A286YDV7 A0A286YDV7_MOUSE | Nucleolar and coiled-body phosphoprotein 1 (Fragment) OS=Mus musculus OX=10090 GN=Nolc1 PE=1 SV=1    | MOUSE | 2 |
| 2792 | 2 | 2    | 12.27 | 6.36  | sp Q9WVB0-2 RBPM5_MOUSE        | Isoform 2 of RNA-binding protein with multiple splicing OS=Mus musculus OX=10090 GN=Rbpms            | MOUSE | 1 |
| 2793 | 2 | 2    | 3.56  | 1.43  | sp Q9DC29 ABCB6_MOUSE          | ATP-binding cassette sub-family B member 6 OS=Mus musculus OX=10090 GN=Abcb6 PE=1 SV=1               | MOUSE | 1 |
| 2794 | 2 | 2    | 3.42  | 3.42  | tr W0SMJ3 W0SMJ3_MOUSE         | Cytochrome b (Fragment) OS=Mus musculus OX=10090 GN=cytb PE=3 SV=1                                   | MOUSE | 2 |
| 2795 | 2 | 2    | 4.02  | 3.65  | tr Q99KL8 Q99KL8_MOUSE         | Nqo1 protein OS=Mus musculus OX=10090 GN=Nqo1 PE=2 SV=1                                              | MOUSE | 1 |
| 2796 | 2 | 2    | 4.21  | 2.97  | tr Q05CC9 Q05CC9_MOUSE         | Porcn protein (Fragment) OS=Mus musculus OX=10090 GN=Porcn PE=2 SV=1                                 | MOUSE | 1 |
| 2797 | 2 | 2    | 19.47 | 8.85  | tr E9PW43 E9PW43_MOUSE         | Predicted pseudogene 10320 OS=Mus musculus OX=10090 GN=Gm10320 PE=3 SV=1                             | MOUSE | 1 |
| 2798 | 2 | 2    | 13.71 | 6.09  | tr D3Z7S0 D3Z7S0_MOUSE         | Golgi to ER traffic protein 4 homolog (Fragment) OS=Mus musculus OX=10090 GN=Get4 PE=1 SV=1          | MOUSE | 1 |
| 2799 | 2 | 2    | 5.58  | 3.46  | tr A2ASL8 A2ASL8_MOUSE         | Endoplasmic reticulum junction formation protein lunapark OS=Mus musculus OX=10090 GN=Lnpk PE=1 SV=1 | MOUSE | 1 |
| 2800 | 2 | 2    | 20.00 | 19.00 | tr A0A0A6YY66 A0A0A6YY66_MOUSE | Vesicle-associated membrane protein 4 OS=Mus musculus OX=10090 GN=Vamp4 PE=1 SV=1                    | MOUSE | 1 |
| 2801 | 2 | 2    | 42.31 | 25.64 | tr A0A0A6YW87 A0A0A6YW87_MOUSE | Protein cornichon homolog 4 OS=Mus musculus OX=10090 GN=Cnih4 PE=1 SV=1                              | MOUSE | 1 |
| 2802 | 2 | 2    | 24.84 | 24.84 | sp Q9WVK0 ATRAP_MOUSE          | Type-1 angiotensin II receptor-associated protein OS=Mus musculus OX=10090 GN=Agtrap PE=1 SV=2       | MOUSE | 1 |
| 2803 | 2 | 2    | 6.07  | 3.04  | sp Q9QXE7 TBL1X_MOUSE          | F-box-like/WD repeat-containing protein TBL1X OS=Mus musculus OX=10090 GN=Tbl1x PE=1 SV=2            | MOUSE | 1 |
| 2804 | 2 | 2    | 8.33  | 5.56  | sp Q9CQU5 ZWINT_MOUSE          | ZW10 interactor OS=Mus musculus OX=10090 GN=Zwint PE=1 SV=1                                          | MOUSE | 1 |

|      |   |   |       |       |                        |                                                                                             |       |   |
|------|---|---|-------|-------|------------------------|---------------------------------------------------------------------------------------------|-------|---|
| 2805 | 2 | 2 | 9.05  | 6.58  | sp Q9CQK7 RWDD1_MOUSE  | RWD domain-containing protein 1 OS=Mus musculus OX=10090 GN=Rwdd1 PE=1 SV=1                 | MOUSE | 1 |
| 2806 | 2 | 2 | 5.45  | 2.37  | sp Q922R1 PHAF1_MOUSE  | Phagosome assembly factor 1 OS=Mus musculus OX=10090 GN=Phaf1 PE=1 SV=2                     | MOUSE | 1 |
| 2807 | 2 | 2 | 4.27  | 2.85  | sp Q8VE80 THOC3_MOUSE  | THO complex subunit 3 OS=Mus musculus OX=10090 GN=Thoc3 PE=2 SV=1                           | MOUSE | 1 |
| 2808 | 2 | 2 | 1.94  | 1.04  | sp Q05909 PTPRG_MOUSE  | Receptor-type tyrosine-protein phosphatase gamma OS=Mus musculus OX=10090 GN=Ptpg PE=1 SV=1 | MOUSE | 1 |
| 2809 | 2 | 2 | 6.53  | 6.53  | tr Q9D1X6 Q9D1X6_MOUSE | UPAR/Ly6 domain-containing protein OS=Mus musculus OX=10090 GN=Ly6h PE=2 SV=1               | MOUSE | 1 |
| 2810 | 2 | 2 | 23.40 | 23.40 | tr Q9CUX0 Q9CUX0_MOUSE | Uncharacterized protein OS=Mus musculus OX=10090 GN=N6amt1 PE=2 SV=2                        | MOUSE | 1 |
| 2811 | 2 | 2 | 2.76  | 2.76  | tr Q99LZ8 Q99LZ8_MOUSE | Single stranded DNA binding protein 4 OS=Mus musculus OX=10090 GN=Ssbp4 PE=2 SV=1           | MOUSE | 1 |
| 2812 | 2 | 2 | 13.82 | 13.82 | tr Q920G6 Q920G6_MOUSE | MAC-inhibitory protein OS=Mus musculus OX=10090 GN=CD59A PE=4 SV=1                          | MOUSE | 1 |
| 2813 | 2 | 2 | 10.00 | 10.00 | tr Q8R3W2 Q8R3W2_MOUSE | RIKEN cDNA 0610009B22 gene OS=Mus musculus OX=10090 GN=0610009B22Rik PE=2 SV=1              | MOUSE | 1 |
| 2814 | 2 | 2 | 9.55  | 9.55  | tr Q8R0Q6 Q8R0Q6_MOUSE | Tspan7 protein OS=Mus musculus OX=10090 GN=Tspan7 PE=2 SV=1                                 | MOUSE | 1 |
| 2815 | 2 | 2 | 5.91  | 5.91  | tr Q8CAD1 Q8CAD1_MOUSE | Ras-binding protein DA-Raf OS=Mus musculus OX=10090 GN=Araf PE=1 SV=1                       | MOUSE | 1 |
| 2816 | 2 | 2 | 25.35 | 25.35 | tr Q8BT77 Q8BT77_MOUSE | Uncharacterized protein (Fragment) OS=Mus musculus OX=10090 GN=Chchd7 PE=2 SV=2             | MOUSE | 1 |
| 2817 | 2 | 2 | 13.04 | 13.04 | tr Q7GIP5 Q7GIP5_MOUSE | NADH-ubiquinone oxidoreductase chain 3 OS=Mus musculus OX=10090 GN=mt-Nd3 PE=2 SV=1         | MOUSE | 2 |
| 2818 | 2 | 2 | 21.69 | 21.69 | tr Q545S6 Q545S6_MOUSE | Transcription elongation factor 1 homolog OS=Mus musculus OX=10090 GN=Elof1 PE=2 SV=1       | MOUSE | 1 |
| 2819 | 2 | 2 | 14.29 | 14.29 | tr Q545K0 Q545K0_MOUSE | Complex I-MWFE OS=Mus musculus OX=10090 GN=Ndufa1 PE=1 SV=1                                 | MOUSE | 1 |
| 2820 | 2 | 2 | 6.52  | 6.52  | tr Q4V9T7 Q4V9T7_MOUSE | Replication termination factor 2 OS=Mus musculus OX=10090 GN=Rtf2 PE=2 SV=1                 | MOUSE | 1 |
| 2821 | 2 | 2 | 7.57  | 7.57  | tr Q4FK79 Q4FK79_MOUSE | Signal sequence receptor subunit gamma OS=Mus musculus OX=10090 GN=Ssr3 PE=2 SV=1           | MOUSE | 1 |

|      |   |   |       |       |                        |                                                                                                                |       |   |
|------|---|---|-------|-------|------------------------|----------------------------------------------------------------------------------------------------------------|-------|---|
| 2822 | 2 | 2 | 10.28 | 10.28 | tr Q3V460 Q3V460_MOUSE | Gene model 561, (NCBI) OS=Mus musculus OX=10090 GN=Smim26 PE=1 SV=1                                            | MOUSE | 1 |
| 2823 | 2 | 2 | 3.49  | 3.49  | tr Q3UYC1 Q3UYC1_MOUSE | Diphosphomevalonate decarboxylase OS=Mus musculus OX=10090 GN=Mvd PE=1 SV=1                                    | MOUSE | 1 |
| 2824 | 2 | 2 | 35.29 | 35.29 | tr Q3UJV6 Q3UJV6_MOUSE | Uncharacterized protein OS=Mus musculus OX=10090 GN=Uqcr11 PE=2 SV=1                                           | MOUSE | 2 |
| 2825 | 2 | 2 | 4.72  | 4.72  | tr Q3UDP8 Q3UDP8_MOUSE | UBC core domain-containing protein OS=Mus musculus OX=10090 GN=Ube2j1 PE=2 SV=1                                | MOUSE | 1 |
| 2826 | 2 | 2 | 5.52  | 5.52  | tr Q3U466 Q3U466_MOUSE | Ceroid-lipofuscinosis, neuronal 6 OS=Mus musculus OX=10090 GN=Cln6 PE=1 SV=1                                   | MOUSE | 1 |
| 2827 | 2 | 2 | 9.92  | 9.92  | tr Q3U3K5 Q3U3K5_MOUSE | Uncharacterized protein OS=Mus musculus OX=10090 GN=Leprotl1 PE=2 SV=1                                         | MOUSE | 1 |
| 2828 | 2 | 2 | 1.53  | 1.53  | tr Q3TR20 Q3TR20_MOUSE | Component of oligomeric Golgi complex 7 OS=Mus musculus OX=10090 GN=Cog7 PE=1 SV=1                             | MOUSE | 1 |
| 2829 | 2 | 2 | 2.73  | 2.73  | tr Q14C53 Q14C53_MOUSE | Solute carrier family 39 (Zinc transporter), member 7 OS=Mus musculus OX=10090 GN=Slc39a7 PE=2 SV=1            | MOUSE | 1 |
| 2830 | 2 | 2 | 25.00 | 25.00 | tr Q14AR0 Q14AR0_MOUSE | RRM domain-containing protein OS=Mus musculus OX=10090 GN=Slirp PE=2 SV=1                                      | MOUSE | 1 |
| 2831 | 2 | 2 | 25.45 | 25.45 | tr F6XV67 F6XV67_MOUSE | RIKEN cDNA 2410004B18 gene (Fragment) OS=Mus musculus OX=10090 GN=2410004B18Rik PE=1 SV=1                      | MOUSE | 1 |
| 2832 | 2 | 2 | 7.84  | 7.84  | tr F6VF36 F6VF36_MOUSE | Signal recognition particle receptor ('docking protein') (Fragment) OS=Mus musculus OX=10090 GN=Srpr PE=1 SV=1 | MOUSE | 1 |
| 2833 | 2 | 2 | 0.35  | 0.35  | tr E9Q9C6 E9Q9C6_MOUSE | Fc fragment of IgG-binding protein OS=Mus musculus OX=10090 GN=Fcgbp PE=1 SV=1                                 | MOUSE | 1 |
| 2834 | 2 | 2 | 16.44 | 16.44 | tr D3Z7P2 D3Z7P2_MOUSE | Transmembrane protein 109 (Fragment) OS=Mus musculus OX=10090 GN=Tmem109 PE=1 SV=1                             | MOUSE | 1 |
| 2835 | 2 | 2 | 3.52  | 3.52  | tr D3Z6S7 D3Z6S7_MOUSE | Immunoglobulin superfamily member 11 OS=Mus musculus OX=10090 GN=Igsl11 PE=1 SV=1                              | MOUSE | 1 |
| 2836 | 2 | 2 | 12.57 | 12.57 | tr D3Z0K7 D3Z0K7_MOUSE | WAS/WASL-interacting protein family member 2 (Fragment) OS=Mus musculus OX=10090 GN=Wipf2 PE=1 SV=1            | MOUSE | 1 |
| 2837 | 2 | 2 | 12.97 | 12.97 | tr A2A6P4 A2A6P4_MOUSE | Family with sequence similarity 104, member A OS=Mus musculus OX=10090 GN=Fam104a PE=1 SV=1                    | MOUSE | 1 |

|      |   |   |       |       |                                |                                                                                                                      |       |   |
|------|---|---|-------|-------|--------------------------------|----------------------------------------------------------------------------------------------------------------------|-------|---|
| 2838 | 2 | 2 | 14.04 | 14.04 | tr A0A1Y7VLP0 A0A1Y7VLP0_MOUSE | ATP synthase membrane subunit 6.8PL (Fragment)<br>OS=Mus musculus OX=10090 GN=Atp5mpl PE=1 SV=1                      | MOUSE | 1 |
| 2839 | 2 | 2 | 12.67 | 12.67 | tr A0A1B0GQW0 A0A1B0GQW0_MOUSE | ER lumen protein-retaining receptor OS=Mus musculus<br>OX=10090 GN=Kdelr1 PE=1 SV=1                                  | MOUSE | 1 |
| 2840 | 2 | 2 | 17.46 | 17.46 | tr A0A0U1RNU5 A0A0U1RNU5_MOUSE | RIKEN cDNA E130218I03 gene OS=Mus musculus<br>OX=10090 GN=E130218I03Rik PE=4 SV=1                                    | MOUSE | 1 |
| 2841 | 2 | 2 | 20.93 | 20.93 | tr A0A0N4SWI4 A0A0N4SWI4_MOUSE | Protein FAM136A OS=Mus musculus OX=10090<br>GN=Fam136a PE=1 SV=1                                                     | MOUSE | 1 |
| 2842 | 2 | 2 | 4.01  | 4.01  | sp Q9QUN9 DKK3_MOUSE           | Dickkopf-related protein 3 OS=Mus musculus OX=10090<br>GN=Dkk3 PE=2 SV=1                                             | MOUSE | 1 |
| 2843 | 2 | 2 | 2.90  | 2.90  | sp Q9D8B7 JAM3_MOUSE           | Junctional adhesion molecule C OS=Mus musculus<br>OX=10090 GN=Jam3 PE=1 SV=2                                         | MOUSE | 1 |
| 2844 | 2 | 2 | 4.45  | 4.45  | sp Q9D4F2 PLPP6_MOUSE          | Phospholipid phosphatase 6 OS=Mus musculus OX=10090<br>GN=Plpp6 PE=1 SV=1                                            | MOUSE | 1 |
| 2845 | 2 | 2 | 6.80  | 6.80  | sp Q9D3P8 PLRKT_MOUSE          | Plasminogen receptor (KT) OS=Mus musculus OX=10090<br>GN=Plgrkt PE=1 SV=1                                            | MOUSE | 1 |
| 2846 | 2 | 2 | 7.10  | 7.10  | sp Q9CR23 TMEM9_MOUSE          | Proton-transporting V-type ATPase complex assembly<br>regulator TMEM9 OS=Mus musculus OX=10090<br>GN=Tmem9 PE=1 SV=1 | MOUSE | 1 |
| 2847 | 2 | 2 | 4.14  | 4.14  | sp Q9CQJ2 PIHD1_MOUSE          | PIH1 domain-containing protein 1 OS=Mus musculus<br>OX=10090 GN=Pih1d1 PE=1 SV=1                                     | MOUSE | 1 |
| 2848 | 2 | 2 | 20.43 | 20.43 | sp Q91VW3 SH3L3_MOUSE          | SH3 domain-binding glutamic acid-rich-like protein 3<br>OS=Mus musculus OX=10090 GN=Sh3bgrl3 PE=1 SV=1               | MOUSE | 1 |
| 2849 | 2 | 2 | 18.32 | 18.32 | sp Q8K273 EMC5_MOUSE           | ER membrane protein complex subunit 5 OS=Mus<br>musculus OX=10090 GN=Mmgt1 PE=1 SV=1                                 | MOUSE | 1 |
| 2850 | 2 | 2 | 9.17  | 9.17  | sp Q8CIB6 TM230_MOUSE          | Transmembrane protein 230 OS=Mus musculus OX=10090<br>GN=Tmem230 PE=1 SV=1                                           | MOUSE | 1 |
| 2851 | 2 | 2 | 9.65  | 9.65  | sp Q8CCI5 RYBP_MOUSE           | RING1 and YY1-binding protein OS=Mus musculus<br>OX=10090 GN=Rybp PE=1 SV=1                                          | MOUSE | 1 |
| 2852 | 2 | 2 | 13.75 | 13.75 | sp Q8BTE5 CEBOS_MOUSE          | Protein CEBPZOS OS=Mus musculus OX=10090<br>GN=Cebpzoz PE=3 SV=2                                                     | MOUSE | 1 |



|      |      |      |       |       |                        |                                                                                                     |       |   |
|------|------|------|-------|-------|------------------------|-----------------------------------------------------------------------------------------------------|-------|---|
| 2853 | 2    | 2    | 2.95  | 2.95  | sp Q8BPS4 GP180_MOUSE  | Integral membrane protein GPR180 OS=Mus musculus<br>OX=10090 GN=Gpr180 PE=1 SV=1                    | MOUSE | 1 |
| 2854 | 2    | 2    | 8.05  | 8.05  | sp Q78XF5 OSTC_MOUSE   | Oligosaccharyltransferase complex subunit OSTC OS=Mus musculus<br>OX=10090 GN=Ostc PE=1 SV=1        | MOUSE | 1 |
| 2855 | 2    | 2    | 6.67  | 6.67  | sp Q6ZWQ7 SPCS3_MOUSE  | Signal peptidase complex subunit 3 OS=Mus musculus<br>OX=10090 GN=Spcc3 PE=1 SV=1                   | MOUSE | 1 |
| 2856 | 2    | 2    | 24.78 | 24.78 | sp Q5F285 TM256_MOUSE  | Transmembrane protein 256 OS=Mus musculus OX=10090<br>GN=Tmem256 PE=1 SV=1                          | MOUSE | 1 |
| 2857 | 2    | 2    | 14.41 | 14.41 | sp P62774 MTPN_MOUSE   | Myotrophin OS=Mus musculus OX=10090 GN=Mtpn PE=1<br>SV=2                                            | MOUSE | 1 |
| 2858 | 1.98 | 2.13 | 3.52  | 0.52  | sp Q8CC88 VWA8_MOUSE   | von Willebrand factor A domain-containing protein 8<br>OS=Mus musculus OX=10090 GN=Vwa8 PE=1 SV=2   | MOUSE | 1 |
| 2859 | 1.98 | 2.08 | 16.62 | 4.83  | sp O54786 DFFA_MOUSE   | DNA fragmentation factor subunit alpha OS=Mus musculus<br>OX=10090 GN=Dffa PE=1 SV=2                | MOUSE | 1 |
| 2860 | 1.98 | 2.04 | 9.87  | 1.92  | sp Q3TDD9 PPR21_MOUSE  | Protein phosphatase 1 regulatory subunit 21 OS=Mus musculus<br>OX=10090 GN=Ppp1r21 PE=1 SV=2        | MOUSE | 1 |
| 2861 | 1.98 | 2.02 | 65.28 | 12.50 | tr E0CY38 E0CY38_MOUSE | Ubiquitin-like protein 5 OS=Mus musculus OX=10090<br>GN=Ubl5 PE=4 SV=1                              | MOUSE | 1 |
| 2862 | 1.97 | 2.13 | 19.69 | 5.00  | tr Q544H0 Q544H0_MOUSE | Eukaryotic translation initiation factor 3 subunit G OS=Mus musculus<br>OX=10090 GN=Eif3g PE=1 SV=1 | MOUSE | 1 |
| 2863 | 1.97 | 2.11 | 9.77  | 4.77  | sp Q3TPE9 ANKY2_MOUSE  | Ankyrin repeat and MYND domain-containing protein 2<br>OS=Mus musculus OX=10090 GN=Ankmy2 PE=1 SV=1 | MOUSE | 2 |
| 2864 | 1.97 | 2.01 | 2.86  | 1.84  | sp Q9EPL2 CSTN1_MOUSE  | Calsyntenin-1 OS=Mus musculus OX=10090 GN=Clstn1<br>PE=1 SV=1                                       | MOUSE | 1 |
| 2865 | 1.96 | 2.19 | 5.47  | 2.17  | tr Q7TSA7 Q7TSA7_MOUSE | Ppp1r9a protein OS=Mus musculus OX=10090 GN=Ppp1r9a<br>PE=2 SV=1                                    | MOUSE | 1 |
| 2866 | 1.96 | 2.11 | 13.87 | 11.31 | tr Q4FJZ6 Q4FJZ6_MOUSE | GCS light chain OS=Mus musculus OX=10090 GN=Gclm<br>PE=1 SV=1                                       | MOUSE | 2 |
| 2867 | 1.96 | 2.1  | 9.61  | 3.74  | sp Q8CFS6 KCNV2_MOUSE  | Potassium voltage-gated channel subfamily V member 2<br>OS=Mus musculus OX=10090 GN=Kcnv2 PE=2 SV=1 | MOUSE | 2 |
| 2868 | 1.96 | 2.08 | 18.96 | 4.19  | tr Q7TPN5 Q7TPN5_MOUSE | Wiskott-Aldrich syndrome-like (Human) OS=Mus musculus<br>OX=10090 GN=Wasl PE=2 SV=1                 | MOUSE | 1 |
| 2869 | 1.96 | 2.01 | 4.43  | 2.39  | tr Q8K2R0 Q8K2R0_MOUSE | Farp1 protein (Fragment) OS=Mus musculus OX=10090<br>GN=Farp1 PE=2 SV=1                             | MOUSE | 2 |

|      |      |       |       |       |                        |                                                                                                            |       |    |
|------|------|-------|-------|-------|------------------------|------------------------------------------------------------------------------------------------------------|-------|----|
| 2870 | 1.95 | 5.31  | 8.89  | 2.45  | tr Q3UIZ0 Q3UIZ0_MOUSE | Uncharacterized protein OS=Mus musculus OX=10090 GN=Gak PE=2 SV=1                                          | MOUSE | 4  |
| 2871 | 1.94 | 2.07  | 7.28  | 2.71  | tr Q3TKH5 Q3TKH5_MOUSE | TRAMP-like complex RNA-binding factor ZCCHC8 (Fragment) OS=Mus musculus OX=10090 GN=Zcchc8 PE=2 SV=1       | MOUSE | 1  |
| 2872 | 1.94 | 2.02  | 4.02  | 1.28  | tr Q80T83 Q80T83_MOUSE | Ubiquitinyl hydrolase 1 (Fragment) OS=Mus musculus OX=10090 GN=Vcpip1 PE=2 SV=1                            | MOUSE | 1  |
| 2873 | 1.93 | 7.69  | 18.29 | 9.43  | sp Q8R4E6 PURG_MOUSE   | Purine-rich element-binding protein gamma OS=Mus musculus OX=10090 GN=Purg PE=1 SV=1                       | MOUSE | 6  |
| 2874 | 1.93 | 2.03  | 3.66  | 1.16  | sp Q8BUH8 SEN7_MOUSE   | Sentrin-specific protease 7 OS=Mus musculus OX=10090 GN=Senp7 PE=1 SV=1                                    | MOUSE | 1  |
| 2875 | 1.92 | 2.25  | 8.96  | 2.46  | tr H9KV00 H9KV00_MOUSE | Protein SON OS=Mus musculus OX=10090 GN=Son PE=1 SV=1                                                      | MOUSE | 2  |
| 2876 | 1.92 | 2     | 6.48  | 1.44  | tr E9Q481 E9Q481_MOUSE | Serine/threonine-protein phosphatase 4 regulatory subunit 3A OS=Mus musculus OX=10090 GN=Ppp4r3a PE=1 SV=1 | MOUSE | 1  |
| 2877 | 1.91 | 2.11  | 8.33  | 3.72  | sp O55106 STRN_MOUSE   | Striatin OS=Mus musculus OX=10090 GN=Strn PE=1 SV=2                                                        | MOUSE | 2  |
| 2878 | 1.9  | 2.07  | 27.70 | 3.05  | tr Q80WF9 Q80WF9_MOUSE | Ceh-10 homeodomain-containing homolog OS=Mus musculus OX=10090 GN=Vsx2 PE=2 SV=2                           | MOUSE | 1  |
| 2879 | 1.9  | 2.06  | 4.05  | 0.99  | tr B2RQG2 B2RQG2_MOUSE | PHD finger protein 3 OS=Mus musculus OX=10090 GN=Phf3 PE=1 SV=1                                            | MOUSE | 2  |
| 2880 | 1.89 | 2.01  | 5.66  | 1.85  | sp Q69ZF3 GBA2_MOUSE   | Non-lysosomal glucosylceramidase OS=Mus musculus OX=10090 GN=Gba2 PE=1 SV=2                                | MOUSE | 1  |
| 2881 | 1.89 | 1.98  | 2.18  | 1.09  | tr B2RY05 B2RY05_MOUSE | Non-specific serine/threonine protein kinase OS=Mus musculus OX=10090 GN=Pik3r4 PE=2 SV=1                  | MOUSE | 1  |
| 2882 | 1.88 | 12.4  | 43.25 | 30.16 | tr G3UYJ7 G3UYJ7_MOUSE | Predicted gene 20441 (Fragment) OS=Mus musculus OX=10090 GN=Gm20441 PE=3 SV=1                              | MOUSE | 6  |
| 2883 | 1.88 | 6.23  | 13.64 | 9.47  | tr Q3TQ93 Q3TQ93_MOUSE | Uncharacterized protein OS=Mus musculus OX=10090 GN=Rab33b PE=2 SV=1                                       | MOUSE | 3  |
| 2884 | 1.88 | 2.63  | 11.16 | 4.46  | sp Q8CHW4 EIF2BE_MOUSE | Translation initiation factor eIF-2B subunit epsilon OS=Mus musculus OX=10090 GN=Eif2b5 PE=1 SV=1          | MOUSE | 3  |
| 2885 | 1.87 | 76.48 | 53.18 | 44.87 | sp Q60597 ODO1_MOUSE   | 2-oxoglutarate dehydrogenase, mitochondrial OS=Mus musculus OX=10090 GN=Ogdh PE=1 SV=3                     | MOUSE | 38 |

|      |      |       |       |       |                        |                                                                                                     |       |    |
|------|------|-------|-------|-------|------------------------|-----------------------------------------------------------------------------------------------------|-------|----|
| 2886 | 1.87 | 2.01  | 24.93 | 11.81 | sp Q8BIF9 ZN787_MOUSE  | Zinc finger protein 787 OS=Mus musculus OX=10090<br>GN=Znf787 PE=2 SV=3                             | MOUSE | 2  |
| 2887 | 1.87 | 1.99  | 6.55  | 2.56  | tr Q3UXU8 Q3UXU8_MOUSE | CST complex subunit STN1 OS=Mus musculus OX=10090<br>GN=Stn1 PE=1 SV=1                              | MOUSE | 1  |
| 2888 | 1.87 | 1.94  | 2.93  | 0.72  | sp O88307 SORL_MOUSE   | Sortilin-related receptor OS=Mus musculus OX=10090<br>GN=Sorl1 PE=1 SV=3                            | MOUSE | 1  |
| 2889 | 1.87 | 1.94  | 9.88  | 7.19  | sp Q9R0D8 WDR54_MOUSE  | WD repeat-containing protein 54 OS=Mus musculus<br>OX=10090 GN=Wdr54 PE=1 SV=1                      | MOUSE | 1  |
| 2890 | 1.86 | 2.05  | 15.96 | 6.49  | sp Q80ZW0 STK35_MOUSE  | Serine/threonine-protein kinase 35 OS=Mus musculus<br>OX=10090 GN=Stk35 PE=1 SV=3                   | MOUSE | 2  |
| 2891 | 1.86 | 1.93  | 5.72  | 2.06  | sp Q8K2I1 FNTB_MOUSE   | Protein farnesyltransferase subunit beta OS=Mus musculus<br>OX=10090 GN=Fntb PE=1 SV=1              | MOUSE | 1  |
| 2892 | 1.85 | 71.31 | 87.20 | 86.40 | tr Q4KL81 Q4KL81_MOUSE | Actin, gamma, cytoplasmic 1 OS=Mus musculus OX=10090<br>GN=Actg1 PE=2 SV=1                          | MOUSE | 88 |
| 2893 | 1.85 | 41.14 | 62.84 | 51.49 | sp O88935-1 SYN1_MOUSE | Isoform Ib of Synapsin-1 OS=Mus musculus OX=10090<br>GN=Syn1                                        | MOUSE | 34 |
| 2894 | 1.85 | 12.52 | 30.69 | 27.80 | sp P97300-3 NPTN_MOUSE | Isoform 3 of Neuropilin OS=Mus musculus OX=10090<br>GN=Nptn                                         | MOUSE | 7  |
| 2895 | 1.85 | 4.26  | 9.59  | 4.12  | tr Q6A074 Q6A074_MOUSE | MKIAA0400 protein (Fragment) OS=Mus musculus<br>OX=10090 GN=Asap2 PE=2 SV=1                         | MOUSE | 3  |
| 2896 | 1.85 | 2.06  | 28.99 | 12.56 | tr B1AX95 B1AX95_MOUSE | Transformation-related protein 63-regulated-like OS=Mus<br>musculus OX=10090 GN=Tprgl PE=1 SV=1     | MOUSE | 2  |
| 2897 | 1.85 | 2.03  | 14.85 | 3.33  | tr Q8C197 Q8C197_MOUSE | Glyco_transf_64 domain-containing protein OS=Mus<br>musculus OX=10090 GN=Extl2 PE=2 SV=1            | MOUSE | 2  |
| 2898 | 1.85 | 1.99  | 4.45  | 4.45  | sp Q5DTY9 KCD16_MOUSE  | BTB/POZ domain-containing protein KCTD16 OS=Mus<br>musculus OX=10090 GN=Kctd16 PE=1 SV=2            | MOUSE | 2  |
| 2899 | 1.85 | 1.96  | 6.81  | 3.29  | tr Q3UNC0 Q3UNC0_MOUSE | NTP_transferase domain-containing protein (Fragment)<br>OS=Mus musculus OX=10090 GN=Gmppa PE=2 SV=1 | MOUSE | 1  |
| 2900 | 1.85 | 1.91  | 7.78  | 3.42  | tr Q3UTZ4 Q3UTZ4_MOUSE | ATP-dependent dihydroxyacetone kinase OS=Mus<br>musculus OX=10090 GN=Tkfc PE=1 SV=1                 | MOUSE | 1  |
| 2901 | 1.84 | 2.02  | 13.45 | 1.42  | sp Q8C7E9 CSTFT_MOUSE  | Cleavage stimulation factor subunit 2 tau variant OS=Mus<br>musculus OX=10090 GN=Cstf2t PE=1 SV=2   | MOUSE | 1  |
| 2902 | 1.84 | 1.98  | 14.75 | 2.81  | tr Q684Q6 Q684Q6_MOUSE | 55 kDa erythrocyte membrane protein (Fragment) OS=Mus<br>musculus OX=10090 GN=Mpp1 PE=2 SV=1        | MOUSE | 1  |

|      |      |      |       |       |                        |                                                                                                      |       |   |
|------|------|------|-------|-------|------------------------|------------------------------------------------------------------------------------------------------|-------|---|
| 2903 | 1.84 | 1.96 | 13.26 | 3.58  | tr D3YUE4 D3YUE4_MOUSE | Family with sequence similarity 151, member B OS=Mus musculus OX=10090 GN=Fam151b PE=1 SV=1          | MOUSE | 1 |
| 2904 | 1.84 | 1.96 | 20.57 | 6.38  | sp Q8WUR0 CS012_MOUSE  | Protein C19orf12 homolog OS=Mus musculus OX=10090 PE=1 SV=1                                          | MOUSE | 1 |
| 2905 | 1.84 | 1.94 | 7.93  | 3.13  | tr Q9QUI3 Q9QUI3_MOUSE | Casein kinase OS=Mus musculus OX=10090 GN=Csnk1e PE=2 SV=1                                           | MOUSE | 1 |
| 2906 | 1.83 | 1.96 | 8.41  | 8.41  | tr Q7JCY9 Q7JCY9_MOUSE | ATP synthase subunit a OS=Mus musculus OX=10090 GN=ATP6 PE=1 SV=1                                    | MOUSE | 2 |
| 2907 | 1.83 | 1.94 | 4.32  | 1.96  | sp Q8BTG3 T11L1_MOUSE  | T-complex protein 11-like protein 1 OS=Mus musculus OX=10090 GN=Tcp11l1 PE=1 SV=1                    | MOUSE | 1 |
| 2908 | 1.82 | 6.19 | 17.32 | 10.24 | tr Q921L9 Q921L9_MOUSE | Protein kinase, cAMP dependent regulatory, type I beta OS=Mus musculus OX=10090 GN=Prkar1b PE=2 SV=1 | MOUSE | 4 |
| 2909 | 1.82 | 2.19 | 6.78  | 4.76  | tr Q3TEP0 Q3TEP0_MOUSE | WD_REPEATS_REGION domain-containing protein OS=Mus musculus OX=10090 GN=Aaas PE=2 SV=1               | MOUSE | 2 |
| 2910 | 1.82 | 2.05 | 2.65  | 1.71  | tr A1L349 A1L349_MOUSE | Polynucleotide adenylyltransferase OS=Mus musculus OX=10090 GN=Papolb PE=1 SV=1                      | MOUSE | 1 |
| 2911 | 1.82 | 1.92 | 2.19  | 2.19  | tr Q2M4G8 Q2M4G8_MOUSE | Protein tyrosine phosphatase, non-receptor type 9 OS=Mus musculus OX=10090 GN=Ptpn9 PE=1 SV=1        | MOUSE | 1 |
| 2912 | 1.82 | 1.91 | 13.44 | 5.38  | sp Q9CY16 RT28_MOUSE   | 28S ribosomal protein S28, mitochondrial OS=Mus musculus OX=10090 GN=Mrps28 PE=1 SV=1                | MOUSE | 1 |
| 2913 | 1.82 | 1.89 | 8.20  | 8.20  | tr Q8R3T4 Q8R3T4_MOUSE | Serum amyloid A protein OS=Mus musculus OX=10090 GN=Saa2 PE=2 SV=1                                   | MOUSE | 1 |
| 2914 | 1.82 | 1.89 | 11.88 | 11.88 | sp Q78T54 VMA21_MOUSE  | Vacuolar ATPase assembly integral membrane protein Vma21 OS=Mus musculus OX=10090 GN=Vma21 PE=1 SV=1 | MOUSE | 1 |
| 2915 | 1.81 | 1.97 | 29.86 | 5.21  | sp Q8VHN8 TIRR_MOUSE   | Tudor-interacting repair regulator protein OS=Mus musculus OX=10090 GN=Nudt16l1 PE=1 SV=2            | MOUSE | 1 |
| 2916 | 1.81 | 1.91 | 7.03  | 3.98  | tr Q99M50 Q99M50_MOUSE | Phospholipid scramblase OS=Mus musculus OX=10090 GN=Plscr1 PE=2 SV=1                                 | MOUSE | 1 |
| 2917 | 1.8  | 2    | 12.06 | 1.75  | tr Q3UI98 Q3UI98_MOUSE | Uncharacterized protein OS=Mus musculus OX=10090 GN=Gtf3c5 PE=2 SV=1                                 | MOUSE | 1 |
| 2918 | 1.8  | 1.89 | 14.13 | 6.36  | sp Q9CQ65 MTAP_MOUSE   | S-methyl-5'-thioadenosine phosphorylase OS=Mus musculus OX=10090 GN=Mtap PE=1 SV=1                   | MOUSE | 1 |

|      |      |      |       |       |                                |                                                                                                                  |       |   |
|------|------|------|-------|-------|--------------------------------|------------------------------------------------------------------------------------------------------------------|-------|---|
| 2919 | 1.8  | 1.89 | 15.56 | 15.56 | tr A0A2R8VHK6 A0A2R8VHK6_MOUSE | Essential MCU regulator, mitochondrial OS=Mus musculus<br>OX=10090 GN=Smdt1 PE=1 SV=1                            | MOUSE | 1 |
| 2920 | 1.8  | 1.89 | 2.04  | 2.04  | sp Q3U4G3 XXLT1_MOUSE          | Xyloside xylosyltransferase 1 OS=Mus musculus OX=10090<br>GN=Xxylt1 PE=1 SV=2                                    | MOUSE | 1 |
| 2921 | 1.79 | 1.91 | 16.22 | 7.34  | tr A2AM95 A2AM95_MOUSE         | Emerin OS=Mus musculus OX=10090 GN=Emd PE=4 SV=1                                                                 | MOUSE | 2 |
| 2922 | 1.79 | 1.87 | 17.28 | 3.70  | sp Q9QYI5 DNJB2_MOUSE          | DnaJ homolog subfamily B member 2 OS=Mus musculus<br>OX=10090 GN=Dnajb2 PE=1 SV=3                                | MOUSE | 1 |
| 2923 | 1.78 | 2.07 | 17.70 | 3.35  | tr Q9DBU8 Q9DBU8_MOUSE         | MHD domain-containing protein OS=Mus musculus<br>OX=10090 GN=Ap3m1 PE=2 SV=1                                     | MOUSE | 1 |
| 2924 | 1.78 | 1.94 | 11.31 | 1.08  | sp Q91WG4 ELP2_MOUSE           | Elongator complex protein 2 OS=Mus musculus OX=10090<br>GN=Elp2 PE=1 SV=1                                        | MOUSE | 1 |
| 2925 | 1.78 | 1.92 | 10.79 | 5.40  | tr E9QMN5 E9QMN5_MOUSE         | Transcriptional repressor p66 alpha OS=Mus musculus<br>OX=10090 GN=Gatad2a PE=1 SV=1                             | MOUSE | 2 |
| 2926 | 1.78 | 1.88 | 7.48  | 1.69  | sp Q8C0L8 COG5_MOUSE           | Conserved oligomeric Golgi complex subunit 5 OS=Mus<br>musculus OX=10090 GN=Cog5 PE=1 SV=3                       | MOUSE | 1 |
| 2927 | 1.78 | 1.87 | 11.00 | 1.92  | sp O35218 CPSF2_MOUSE          | Cleavage and polyadenylation specificity factor subunit 2<br>OS=Mus musculus OX=10090 GN=Cpsf2 PE=1 SV=1         | MOUSE | 1 |
| 2928 | 1.78 | 1.87 | 4.36  | 0.75  | tr E9PYJ7 E9PYJ7_MOUSE         | Membrane-associated phosphatidylinositol transfer protein<br>2 OS=Mus musculus OX=10090 GN=Pitpnm2 PE=1 SV=1     | MOUSE | 1 |
| 2929 | 1.77 | 3    | 16.89 | 4.55  | sp Q6P9R2 OXSR1_MOUSE          | Serine/threonine-protein kinase OSR1 OS=Mus musculus<br>OX=10090 GN=Oxsr1 PE=1 SV=1                              | MOUSE | 2 |
| 2930 | 1.77 | 1.95 | 17.05 | 6.78  | tr Q80YP1 Q80YP1_MOUSE         | Arginyl-tRNA--protein transferase 1 OS=Mus musculus<br>OX=10090 GN=Ate1 PE=2 SV=1                                | MOUSE | 2 |
| 2931 | 1.77 | 1.88 | 14.29 | 11.16 | tr Q5FWJ7 Q5FWJ7_MOUSE         | Vesicle transport through interaction with t-SNAREs<br>homolog 1A OS=Mus musculus OX=10090 GN=Vti1a PE=1<br>SV=1 | MOUSE | 1 |
| 2932 | 1.77 | 1.87 | 13.01 | 3.76  | sp Q69ZC8 GPAM1_MOUSE          | GPALPP motifs-containing protein 1 OS=Mus musculus<br>OX=10090 GN=Gpalpp1 PE=1 SV=2                              | MOUSE | 1 |
| 2933 | 1.77 | 1.86 | 18.56 | 8.98  | tr Q3UEX1 Q3UEX1_MOUSE         | Tubby protein (Fragment) OS=Mus musculus OX=10090<br>GN=Tub PE=1 SV=1                                            | MOUSE | 1 |
| 2934 | 1.77 | 1.85 | 4.15  | 2.17  | sp P23953 EST1C_MOUSE          | Carboxylesterase 1C OS=Mus musculus OX=10090<br>GN=Ces1c PE=1 SV=4                                               | MOUSE | 1 |

|      |      |      |       |       |                        |                                                                                                                        |       |   |
|------|------|------|-------|-------|------------------------|------------------------------------------------------------------------------------------------------------------------|-------|---|
| 2935 | 1.77 | 1.85 | 20.87 | 20.87 | tr Q3TYE9 Q3TYE9_MOUSE | Uncharacterized protein (Fragment) OS=Mus musculus<br>OX=10090 GN=Reep2 PE=2 SV=1                                      | MOUSE | 1 |
| 2936 | 1.77 | 1.85 | 8.75  | 8.75  | tr F6R220 F6R220_MOUSE | GDP-Man:Man(3)GlcNAc(2)-PP-Dol alpha-1,2-mannosyltransferase (Fragment) OS=Mus musculus<br>OX=10090 GN=Alg11 PE=1 SV=1 | MOUSE | 1 |
| 2937 | 1.76 | 3.7  | 6.06  | 2.54  | sp Q80TJ7 PHF8_MOUSE   | Histone lysine demethylase PHF8 OS=Mus musculus<br>OX=10090 GN=Phf8 PE=1 SV=2                                          | MOUSE | 2 |
| 2938 | 1.76 | 1.89 | 12.05 | 3.96  | sp Q8BJW6 EIF2A_MOUSE  | Eukaryotic translation initiation factor 2A OS=Mus musculus<br>OX=10090 GN=Eif2a PE=1 SV=2                             | MOUSE | 2 |
| 2939 | 1.76 | 1.88 | 32.32 | 10.37 | sp Q9D967 MGDP1_MOUSE  | Magnesium-dependent phosphatase 1 OS=Mus musculus<br>OX=10090 GN=Mdp1 PE=1 SV=1                                        | MOUSE | 1 |
| 2940 | 1.76 | 1.86 | 20.29 | 6.52  | sp Q9DAU1 CNPY3_MOUSE  | Protein canopy homolog 3 OS=Mus musculus<br>OX=10090 GN=Cnp3 PE=1 SV=1                                                 | MOUSE | 1 |
| 2941 | 1.76 | 1.85 | 10.56 | 6.11  | sp Q9CYK1 SYWM_MOUSE   | Tryptophan--tRNA ligase, mitochondrial OS=Mus musculus<br>OX=10090 GN=Wars2 PE=1 SV=2                                  | MOUSE | 1 |
| 2942 | 1.76 | 1.84 | 3.67  | 0.64  | tr Q80SX9 Q80SX9_MOUSE | Kidins220 protein (Fragment) OS=Mus musculus<br>OX=10090 GN=Kidins220 PE=2 SV=1                                        | MOUSE | 1 |
| 2943 | 1.75 | 1.9  | 7.02  | 4.26  | tr Q3UDP9 Q3UDP9_MOUSE | MFS domain-containing protein OS=Mus musculus<br>OX=10090 GN=Slc16a3 PE=1 SV=1                                         | MOUSE | 2 |
| 2944 | 1.75 | 1.89 | 13.38 | 4.54  | tr E9PWK1 E9PWK1_MOUSE | Epoxide hydrolase OS=Mus musculus<br>OX=10090 GN=Ephx1 PE=1 SV=1                                                       | MOUSE | 2 |
| 2945 | 1.75 | 1.88 | 2.01  | 0.44  | tr G5E893 G5E893_MOUSE | Ankyrin repeat domain 12 OS=Mus musculus<br>OX=10090 GN=Ankrd12 PE=1 SV=1                                              | MOUSE | 1 |
| 2946 | 1.74 | 2.15 | 16.28 | 12.62 | sp Q9QZH3 PPIE_MOUSE   | Peptidyl-prolyl cis-trans isomerase E OS=Mus musculus<br>OX=10090 GN=Ppie PE=1 SV=2                                    | MOUSE | 3 |
| 2947 | 1.74 | 1.82 | 11.32 | 11.32 | tr Q58DZ5 Q58DZ5_MOUSE | Mitochondrial ribosomal protein S33 OS=Mus musculus<br>OX=10090 GN=Mrps33 PE=1 SV=1                                    | MOUSE | 1 |
| 2948 | 1.73 | 1.9  | 12.44 | 2.39  | sp Q9CZP5 BCS1_MOUSE   | Mitochondrial chaperone BCS1 OS=Mus musculus<br>OX=10090 GN=Bcs1l PE=1 SV=1                                            | MOUSE | 1 |
| 2949 | 1.73 | 1.8  | 5.98  | 3.63  | sp P28481 CO2A1_MOUSE  | Collagen alpha-1(II) chain OS=Mus musculus<br>OX=10090 GN=Col2a1 PE=1 SV=2                                             | MOUSE | 3 |
| 2950 | 1.73 | 1.8  | 5.01  | 2.90  | tr Q8C7Z5 Q8C7Z5_MOUSE | Uncharacterized protein OS=Mus musculus<br>OX=10090 GN=Kcnj10 PE=2 SV=1                                                | MOUSE | 1 |

|      |      |      |       |       |                                |                                                                                                               |       |   |
|------|------|------|-------|-------|--------------------------------|---------------------------------------------------------------------------------------------------------------|-------|---|
| 2951 | 1.72 | 16   | 49.74 | 49.21 | sp P60766-1 CDC42_MOUSE        | Isoform 1 of Cell division control protein 42 homolog OS=Mus musculus OX=10090 GN=Cdc42                       | MOUSE | 9 |
| 2952 | 1.72 | 2.11 | 16.13 | 1.47  | tr A2A9P6 A2A9P6_MOUSE         | Cyclin-dependent kinase 11B OS=Mus musculus OX=10090 GN=Cdk11b PE=1 SV=1                                      | MOUSE | 1 |
| 2953 | 1.72 | 1.87 | 6.24  | 1.91  | sp Q8K2J0 PLCD3_MOUSE          | 1-phosphatidylinositol 4,5-bisphosphate phosphodiesterase delta-3 OS=Mus musculus OX=10090 GN=Plcd3 PE=1 SV=2 | MOUSE | 1 |
| 2954 | 1.72 | 1.8  | 7.25  | 4.93  | tr M1VMU3 M1VMU3_MOUSE         | NADH-ubiquinone oxidoreductase chain 2 OS=Mus musculus OX=10090 GN=ND2 PE=3 SV=1                              | MOUSE | 1 |
| 2955 | 1.71 | 3.39 | 22.88 | 11.44 | sp Q3UL36 ARGL1_MOUSE          | Arginine and glutamate-rich protein 1 OS=Mus musculus OX=10090 GN=Arglu1 PE=1 SV=2                            | MOUSE | 3 |
| 2956 | 1.71 | 1.88 | 10.24 | 3.18  | tr Q3V3A4 Q3V3A4_MOUSE         | Vacuolar protein sorting-associated protein 52 homolog OS=Mus musculus OX=10090 GN=Vps52 PE=2 SV=1            | MOUSE | 2 |
| 2957 | 1.71 | 1.87 | 28.34 | 17.11 | tr A0A3Q4EGL6 A0A3Q4EGL6_MOUSE | Sulfhydryl oxidase OS=Mus musculus OX=10090 GN=Gfer PE=1 SV=1                                                 | MOUSE | 3 |
| 2958 | 1.71 | 1.84 | 8.87  | 5.75  | tr Q8BYY1 Q8BYY1_MOUSE         | Uncharacterized protein OS=Mus musculus OX=10090 GN=Ngfr PE=2 SV=1                                            | MOUSE | 1 |
| 2959 | 1.7  | 1.89 | 4.61  | 2.16  | tr B2RRC5 B2RRC5_MOUSE         | RAB GTPase activating protein 1 OS=Mus musculus OX=10090 GN=Rabgap1 PE=2 SV=1                                 | MOUSE | 2 |
| 2960 | 1.7  | 1.8  | 7.35  | 1.28  | tr Q05DK2 Q05DK2_MOUSE         | Ctr9 protein (Fragment) OS=Mus musculus OX=10090 GN=Ctr9 PE=2 SV=1                                            | MOUSE | 1 |
| 2961 | 1.7  | 1.8  | 3.02  | 1.04  | tr Q6NWW3 Q6NWW3_MOUSE         | Grip1 protein OS=Mus musculus OX=10090 GN=Grip1 PE=2 SV=1                                                     | MOUSE | 1 |
| 2962 | 1.7  | 1.77 | 20.35 | 11.50 | tr Q99KD6 Q99KD6_MOUSE         | Cox7a2l protein OS=Mus musculus OX=10090 GN=Cox7a2l PE=2 SV=1                                                 | MOUSE | 1 |
| 2963 | 1.69 | 1.85 | 12.03 | 1.65  | tr Q3TW27 Q3TW27_MOUSE         | Negative elongation factor D OS=Mus musculus OX=10090 GN=Nelfcd PE=1 SV=1                                     | MOUSE | 1 |
| 2964 | 1.69 | 1.8  | 12.29 | 2.50  | tr Q3TET5 Q3TET5_MOUSE         | Beta-MPP (Fragment) OS=Mus musculus OX=10090 GN=Pmpcb PE=2 SV=1                                               | MOUSE | 1 |
| 2965 | 1.69 | 1.8  | 12.65 | 6.53  | tr E0CYC4 E0CYC4_MOUSE         | Cyclin-dependent kinase 8 (Fragment) OS=Mus musculus OX=10090 GN=Cdk8 PE=1 SV=1                               | MOUSE | 1 |
| 2966 | 1.69 | 1.78 | 5.17  | 1.34  | tr A0A6I8MWZ0 A0A6I8MWZ0_MOUSE | Peptidylprolyl isomerase (Fragment) OS=Mus musculus OX=10090 GN=Fkbp15 PE=1 SV=1                              | MOUSE | 1 |

|      |      |       |       |       |                                |                                                                                                              |       |    |
|------|------|-------|-------|-------|--------------------------------|--------------------------------------------------------------------------------------------------------------|-------|----|
| 2967 | 1.68 | 2.47  | 15.93 | 7.08  | sp Q6IFX2 K1C42_MOUSE          | Keratin, type I cytoskeletal 42 OS=Mus musculus OX=10090 GN=Krt42 PE=1 SV=1                                  | MOUSE | 3  |
| 2968 | 1.68 | 1.93  | 11.87 | 3.58  | sp Q8VCW8 ACSF2_MOUSE          | Medium-chain acyl-CoA ligase ACSF2, mitochondrial OS=Mus musculus OX=10090 GN=Acsf2 PE=1 SV=1                | MOUSE | 2  |
| 2969 | 1.68 | 1.82  | 11.67 | 2.38  | tr Q3UGE1 Q3UGE1_MOUSE         | TPR_REGION domain-containing protein OS=Mus musculus OX=10090 GN=Trappc12 PE=2 SV=1                          | MOUSE | 1  |
| 2970 | 1.68 | 1.77  | 6.98  | 1.66  | tr A0A0R4J0W6 A0A0R4J0W6_MOUSE | Leucine-rich repeat-containing protein 40 OS=Mus musculus OX=10090 GN=Lrrc40 PE=1 SV=1                       | MOUSE | 1  |
| 2971 | 1.67 | 1.8   | 13.21 | 3.19  | sp Q9R0X4 ACOT9_MOUSE          | Acyl-coenzyme A thioesterase 9, mitochondrial OS=Mus musculus OX=10090 GN=Acot9 PE=1 SV=1                    | MOUSE | 1  |
| 2972 | 1.66 | 64.34 | 61.99 | 54.83 | sp P17879 HS71B_MOUSE          | Heat shock 70 kDa protein 1B OS=Mus musculus OX=10090 GN=Hspa1b PE=1 SV=3                                    | MOUSE | 45 |
| 2973 | 1.65 | 4.85  | 6.50  | 3.03  | tr E9Q7E9 E9Q7E9_MOUSE         | Phosphofurin acidic cluster sorting protein 2 OS=Mus musculus OX=10090 GN=Pacs2 PE=1 SV=1                    | MOUSE | 3  |
| 2974 | 1.65 | 3.02  | 19.72 | 12.84 | tr Q3U1N3 Q3U1N3_MOUSE         | Harvey rat sarcoma oncogene, subgroup R OS=Mus musculus OX=10090 GN=Rras PE=1 SV=1                           | MOUSE | 2  |
| 2975 | 1.65 | 1.88  | 16.87 | 9.81  | tr A0A2K6EDK3 A0A2K6EDK3_MOUSE | NudC domain-containing protein 1 OS=Mus musculus OX=10090 GN=Nudcd1 PE=1 SV=1                                | MOUSE | 3  |
| 2976 | 1.65 | 1.75  | 9.21  | 4.61  | tr E9Q156 E9Q156_MOUSE         | tRNA (guanine-N(7)-)-methyltransferase non-catalytic subunit WDR4 OS=Mus musculus OX=10090 GN=Wdr4 PE=1 SV=1 | MOUSE | 1  |
| 2977 | 1.64 | 1.76  | 9.42  | 1.19  | tr Q8BWV2 Q8BWV2_MOUSE         | Vacuolar protein sorting-associated protein 16 homolog OS=Mus musculus OX=10090 GN=Vps16 PE=2 SV=1           | MOUSE | 1  |
| 2978 | 1.64 | 1.72  | 4.52  | 4.52  | tr Q497T6 Q497T6_MOUSE         | COMM domain containing 2 OS=Mus musculus OX=10090 GN=Commd2 PE=1 SV=1                                        | MOUSE | 1  |
| 2979 | 1.63 | 1.86  | 37.93 | 7.59  | tr Q14BF8 Q14BF8_MOUSE         | Trafficking protein particle complex subunit OS=Mus musculus OX=10090 GN=Trappc1 PE=1 SV=1                   | MOUSE | 1  |
| 2980 | 1.63 | 1.81  | 14.06 | 2.67  | sp Q8CHT0 AL4A1_MOUSE          | Delta-1-pyrroline-5-carboxylate dehydrogenase, mitochondrial OS=Mus musculus OX=10090 GN=Aldh4a1 PE=1 SV=3   | MOUSE | 1  |
| 2981 | 1.63 | 1.76  | 7.48  | 1.15  | tr Q6GR78 Q6GR78_MOUSE         | Amyloid-beta A4 protein OS=Mus musculus OX=10090 GN=App PE=2 SV=1                                            | MOUSE | 1  |
| 2982 | 1.63 | 1.75  | 2.62  | 0.54  | tr B2RSW8 B2RSW8_MOUSE         | Pericentriolar material 1 OS=Mus musculus OX=10090 GN=Pcm1 PE=2 SV=1                                         | MOUSE | 1  |



|      |      |      |       |       |                         |                                                                                                        |       |   |
|------|------|------|-------|-------|-------------------------|--------------------------------------------------------------------------------------------------------|-------|---|
| 2983 | 1.62 | 4.77 | 22.22 | 15.66 | tr Q3U281 Q3U281_MOUSE  | Uncharacterized protein OS=Mus musculus OX=10090 GN=Sar1b PE=2 SV=1                                    | MOUSE | 3 |
| 2984 | 1.62 | 1.71 | 12.54 | 10.10 | tr Q62347 Q62347_MOUSE  | Cyclic AMP-responsive element-binding protein 1 OS=Mus musculus OX=10090 GN=Creb1 PE=1 SV=1            | MOUSE | 1 |
| 2985 | 1.62 | 1.7  | 14.01 | 9.34  | sp Q8BQP9 R7BP_MOUSE    | Regulator of G-protein signaling 7-binding protein OS=Mus musculus OX=10090 GN=Rgs7bp PE=1 SV=1        | MOUSE | 2 |
| 2986 | 1.62 | 1.7  | 3.05  | 1.60  | tr E9Q1U6 E9Q1U6_MOUSE  | CBP80/20-dependent translation initiation factor OS=Mus musculus OX=10090 GN=Ctif PE=1 SV=1            | MOUSE | 1 |
| 2987 | 1.61 | 2.32 | 7.44  | 3.86  | tr Q8C0C2 Q8C0C2_MOUSE  | USP domain-containing protein OS=Mus musculus OX=10090 GN=Usp11 PE=2 SV=1                              | MOUSE | 2 |
| 2988 | 1.61 | 1.8  | 12.38 | 4.88  | sp Q61753 SERA_MOUSE    | D-3-phosphoglycerate dehydrogenase OS=Mus musculus OX=10090 GN=Phgdh PE=1 SV=3                         | MOUSE | 2 |
| 2989 | 1.61 | 1.76 | 24.35 | 18.26 | sp Q9CQ86 MIEN1_MOUSE   | Migration and invasion enhancer 1 OS=Mus musculus OX=10090 GN=Mien1 PE=1 SV=1                          | MOUSE | 2 |
| 2990 | 1.6  | 1.76 | 22.03 | 10.13 | sp Q9CR11 YETS4_MOUSE   | YEATS domain-containing protein 4 OS=Mus musculus OX=10090 GN=Yeats4 PE=2 SV=1                         | MOUSE | 2 |
| 2991 | 1.6  | 1.72 | 4.24  | 0.56  | tr E9QML5 E9QML5_MOUSE  | Zinc finger protein 638 OS=Mus musculus OX=10090 GN=Zfp638 PE=1 SV=2                                   | MOUSE | 1 |
| 2992 | 1.6  | 1.7  | 5.73  | 2.20  | tr Q80X31 Q80X31_MOUSE  | Sodium/hydrogen exchanger OS=Mus musculus OX=10090 GN=Slc9a1 PE=2 SV=1                                 | MOUSE | 1 |
| 2993 | 1.6  | 1.68 | 3.93  | 3.93  | sp Q80V26 IMPA3_MOUSE   | Golgi-resident adenosine 3',5'-bisphosphate 3'-phosphatase OS=Mus musculus OX=10090 GN=Bpnt2 PE=1 SV=1 | MOUSE | 1 |
| 2994 | 1.6  | 1.67 | 6.43  | 1.64  | tr Q8BRU5 Q8BRU5_MOUSE  | RNA helicase OS=Mus musculus OX=10090 GN=Ddx50 PE=2 SV=1                                               | MOUSE | 1 |
| 2995 | 1.59 | 3.89 | 5.05  | 3.39  | sp Q7TSH6-3 SCAF4_MOUSE | Isoform 3 of SR-related and CTD-associated factor 4 OS=Mus musculus OX=10090 GN=Scaf4                  | MOUSE | 3 |
| 2996 | 1.59 | 3.37 | 24.29 | 15.00 | tr F6T4M4 F6T4M4_MOUSE  | Serine/arginine repetitive matrix protein 1 (Fragment) OS=Mus musculus OX=10090 GN=Srrm1 PE=1 SV=1     | MOUSE | 2 |
| 2997 | 1.59 | 2.13 | 12.08 | 2.66  | tr J3QJU5 J3QJU5_MOUSE  | LLGL scribble cell polarity complex component 2 OS=Mus musculus OX=10090 GN=Llg12 PE=1 SV=1            | MOUSE | 1 |
| 2998 | 1.59 | 1.74 | 3.49  | 1.01  | tr A2AA71 A2AA71_MOUSE  | Protein transport protein Sec24A OS=Mus musculus OX=10090 GN=Sec24a PE=1 SV=1                          | MOUSE | 1 |

|      |      |      |       |       |                            |                                                                                                  |       |   |
|------|------|------|-------|-------|----------------------------|--------------------------------------------------------------------------------------------------|-------|---|
| 2999 | 1.59 | 1.72 | 20.08 | 7.20  | tr Q3TDL0 Q3TDL0_MOUSE     | PCI domain-containing protein OS=Mus musculus<br>OX=10090 GN=Cops7b PE=2 SV=1                    | MOUSE | 1 |
| 3000 | 1.59 | 1.69 | 1.89  | 0.73  | sp Q8K448 ABCA5_MOUSE      | Cholesterol transporter ABCA5 OS=Mus musculus<br>OX=10090 GN=Abca5 PE=1 SV=2                     | MOUSE | 1 |
| 3001 | 1.58 | 7.05 | 17.25 | 12.66 | tr Q6ZQK4 Q6ZQK4_MOUSE     | MKIAA0044 protein (Fragment) OS=Mus musculus<br>OX=10090 GN=Ppp2r5c PE=2 SV=1                    | MOUSE | 4 |
| 3002 | 1.58 | 1.68 | 13.64 | 3.79  | tr G3X9M0 G3X9M0_MOUSE     | 28S ribosomal protein S29, mitochondrial OS=Mus musculus<br>OX=10090 GN=Dap3 PE=1 SV=1           | MOUSE | 1 |
| 3003 | 1.58 | 1.67 | 8.25  | 4.29  | tr Q6NSU0 Q6NSU0_MOUSE     | Protein FAM3C (Fragment) OS=Mus musculus<br>OX=10090 GN=Fam3c PE=2 SV=2                          | MOUSE | 1 |
| 3004 | 1.57 | 1.72 | 3.66  | 1.32  | tr F6VBV0 F6VBV0_MOUSE     | Regulating synaptic membrane exocytosis protein 1<br>OS=Mus musculus OX=10090 GN=Rims1 PE=1 SV=3 | MOUSE | 1 |
| 3005 | 1.57 | 1.69 | 15.49 | 2.89  | tr Q9JJQ6 Q9JJQ6_MOUSE     | Factor 8-associated gene A OS=Mus musculus<br>OX=10090 GN=F8a PE=1 SV=1                          | MOUSE | 1 |
| 3006 | 1.57 | 1.66 | 5.17  | 2.01  | tr Z4YMT0 Z4YMT0_MOUSE     | TATA box-binding protein-like 2 (Fragment) OS=Mus musculus<br>OX=10090 GN=Tbp12 PE=3 SV=1        | MOUSE | 1 |
| 3007 | 1.57 | 1.64 | 4.08  | 4.08  | RRRRRsp Q3KQJ0 TMM69_MOUSE | REVERSED Transmembrane protein 69 OS=Mus musculus<br>OX=10090 GN=Tmem69 PE=2 SV=2                | MOUSE | 1 |
| 3008 | 1.56 | 1.69 | 16.25 | 5.00  | tr Q8BLQ6 Q8BLQ6_MOUSE     | AP complex subunit sigma OS=Mus musculus<br>OX=10090 GN=Ap1s2 PE=2 SV=1                          | MOUSE | 1 |
| 3009 | 1.56 | 1.66 | 8.11  | 2.51  | tr Q9Z162 Q9Z162_MOUSE     | Vascular endothelial zinc finger 1 OS=Mus musculus<br>OX=10090 GN=Vezf1 PE=2 SV=1                | MOUSE | 1 |
| 3010 | 1.55 | 1.68 | 18.47 | 3.36  | tr Q8BVU9 Q8BVU9_MOUSE     | Collagen-binding protein OS=Mus musculus<br>OX=10090 GN=Serpinh1 PE=2 SV=1                       | MOUSE | 1 |
| 3011 | 1.55 | 1.66 | 7.20  | 2.13  | tr Q3U2Z5 Q3U2Z5_MOUSE     | SH3 domain-containing protein OS=Mus musculus<br>OX=10090 GN=Eps8 PE=2 SV=1                      | MOUSE | 1 |
| 3012 | 1.55 | 1.64 | 4.83  | 4.83  | tr Q6PB99 Q6PB99_MOUSE     | Ena/VASP-like protein OS=Mus musculus<br>OX=10090 GN=Ev1 PE=2 SV=1                               | MOUSE | 1 |
| 3013 | 1.55 | 1.64 | 8.78  | 8.78  | sp Q99N92 RM27_MOUSE       | 39S ribosomal protein L27, mitochondrial OS=Mus musculus<br>OX=10090 GN=Mrpl27 PE=1 SV=1         | MOUSE | 1 |
| 3014 | 1.55 | 1.62 | 5.82  | 3.88  | tr E9QKB2 E9QKB2_MOUSE     | Intracellular hyaluronan-binding protein 4 OS=Mus musculus<br>OX=10090 GN=Habp4 PE=1 SV=1        | MOUSE | 1 |
| 3015 | 1.54 | 1.71 | 25.00 | 9.72  | tr B7ZNW0 B7ZNW0_MOUSE     | Pgam5 protein OS=Mus musculus<br>OX=10090 GN=Pgam5 PE=2 SV=1                                     | MOUSE | 3 |

|      |      |      |       |       |                                |                                                                                                                                           |       |   |
|------|------|------|-------|-------|--------------------------------|-------------------------------------------------------------------------------------------------------------------------------------------|-------|---|
| 3016 | 1.54 | 1.63 | 10.87 | 6.25  | sp Q8BIG4 FBX28_MOUSE          | F-box only protein 28 OS=Mus musculus OX=10090 GN=Fbxo28 PE=1 SV=1                                                                        | MOUSE | 1 |
| 3017 | 1.54 | 1.62 | 1.38  | 0.89  | tr A0A087WSD2 A0A087WSD2_MOUSE | Membrane-spanning 4-domains, subfamily A, member 14 OS=Mus musculus OX=10090 GN=Ms4a14 PE=3 SV=1                                          | MOUSE | 1 |
| 3018 | 1.54 | 1.62 | 17.92 | 7.51  | sp Q8C838 TARG1_MOUSE          | Trafficking regulator of GLUT4 1 OS=Mus musculus OX=10090 GN=Trarg1 PE=1 SV=1                                                             | MOUSE | 1 |
| 3019 | 1.53 | 1.62 | 11.66 | 4.71  | sp Q8R3E3 WIP1_MOUSE           | WD repeat domain phosphoinositide-interacting protein 1 OS=Mus musculus OX=10090 GN=Wipi1 PE=1 SV=1                                       | MOUSE | 1 |
| 3020 | 1.53 | 1.61 | 6.19  | 4.19  | tr F6SQM4 F6SQM4_MOUSE         | Protein FAM234A OS=Mus musculus OX=10090 GN=Fam234a PE=1 SV=2                                                                             | MOUSE | 1 |
| 3021 | 1.52 | 1.7  | 24.76 | 15.53 | tr B1AUZ1 B1AUZ1_MOUSE         | N-alpha-acetyltransferase 10 OS=Mus musculus OX=10090 GN=Naa10 PE=1 SV=1                                                                  | MOUSE | 2 |
| 3022 | 1.52 | 1.6  | 8.04  | 8.04  | tr D3Z497 D3Z497_MOUSE         | Predicted gene 7075 OS=Mus musculus OX=10090 GN=Gm7075 PE=3 SV=1                                                                          | MOUSE | 1 |
| 3023 | 1.52 | 1.6  | 9.09  | 9.09  | sp Q9CQW0 EMC6_MOUSE           | ER membrane protein complex subunit 6 OS=Mus musculus OX=10090 GN=Emc6 PE=1 SV=1                                                          | MOUSE | 1 |
| 3024 | 1.51 | 1.65 | 11.71 | 2.24  | tr Q80YG4 Q80YG4_MOUSE         | SEC63 OS=Mus musculus OX=10090 GN=Sec63 PE=2 SV=1                                                                                         | MOUSE | 1 |
| 3025 | 1.51 | 1.65 | 15.27 | 8.78  | tr F6WMX7 F6WMX7_MOUSE         | Calcium uptake protein 3, mitochondrial (Fragment) OS=Mus musculus OX=10090 GN=Micu3 PE=1 SV=1                                            | MOUSE | 3 |
| 3026 | 1.51 | 1.63 | 7.21  | 2.56  | sp Q8K099 LRIT1_MOUSE          | Leucine-rich repeat, immunoglobulin-like domain and transmembrane domain-containing protein 1 OS=Mus musculus OX=10090 GN=Lrit1 PE=2 SV=2 | MOUSE | 1 |
| 3027 | 1.51 | 1.6  | 14.47 | 14.47 | tr B2RVQ7 B2RVQ7_MOUSE         | Zinc finger protein 706 OS=Mus musculus OX=10090 GN=Zfp706 PE=1 SV=1                                                                      | MOUSE | 1 |
| 3028 | 1.5  | 1.75 | 7.75  | 2.58  | tr Q80UI9 Q80UI9_MOUSE         | Wolfram syndrome 1 homolog (Human) OS=Mus musculus OX=10090 GN=Wfs1 PE=2 SV=1                                                             | MOUSE | 2 |
| 3029 | 1.5  | 1.63 | 4.54  | 4.54  | tr Q3UX26 Q3UX26_MOUSE         | Uncharacterized protein (Fragment) OS=Mus musculus OX=10090 GN=Pak1ip1 PE=2 SV=1                                                          | MOUSE | 2 |
| 3030 | 1.49 | 1.65 | 7.00  | 1.08  | sp O54991 CNTP1_MOUSE          | Contactin-associated protein 1 OS=Mus musculus OX=10090 GN=Cntnap1 PE=1 SV=2                                                              | MOUSE | 1 |
| 3031 | 1.49 | 1.58 | 9.09  | 2.17  | sp Q9ET22 DPP2_MOUSE           | Dipeptidyl peptidase 2 OS=Mus musculus OX=10090 GN=Dpp7 PE=1 SV=2                                                                         | MOUSE | 1 |

|      |      |      |       |       |                                |                                                                                                              |       |   |
|------|------|------|-------|-------|--------------------------------|--------------------------------------------------------------------------------------------------------------|-------|---|
| 3032 | 1.48 | 10.3 | 10.56 | 2.71  | sp G3X9K3 BIG1_MOUSE           | Brefeldin A-inhibited guanine nucleotide-exchange protein 1 OS=Mus musculus OX=10090 GN=Arfgef1 PE=1 SV=1    | MOUSE | 5 |
| 3033 | 1.48 | 2.14 | 11.28 | 3.76  | tr Q8BS26 Q8BS26_MOUSE         | Uncharacterized protein OS=Mus musculus OX=10090 GN=Akt1 PE=2 SV=1                                           | MOUSE | 1 |
| 3034 | 1.48 | 1.62 | 7.75  | 7.75  | tr E0CY81 E0CY81_MOUSE         | Predicted readthrough transcript (NMD candidate), 44505 OS=Mus musculus OX=10090 GN=Gm44505 PE=1 SV=1        | MOUSE | 2 |
| 3035 | 1.48 | 1.58 | 7.47  | 3.14  | sp Q99M31 HSP7E_MOUSE          | Heat shock 70 kDa protein 14 OS=Mus musculus OX=10090 GN=Hspa14 PE=1 SV=2                                    | MOUSE | 1 |
| 3036 | 1.48 | 1.57 | 10.09 | 4.32  | tr Q71VB4 Q71VB4_MOUSE         | PBX1b OS=Mus musculus OX=10090 GN=Pbx1 PE=2 SV=1                                                             | MOUSE | 1 |
| 3037 | 1.48 | 1.57 | 4.29  | 4.29  | tr E3WH30 E3WH30_MOUSE         | Meiosis protein 5 homolog OS=Mus musculus OX=10090 GN=Sfr1 PE=2 SV=1                                         | MOUSE | 1 |
| 3038 | 1.47 | 1.62 | 9.14  | 7.21  | tr Q80YC0 Q80YC0_MOUSE         | Sel1l protein (Fragment) OS=Mus musculus OX=10090 GN=Sel1l PE=2 SV=1                                         | MOUSE | 2 |
| 3039 | 1.47 | 1.57 | 10.00 | 2.40  | tr A2AQJ7 A2AQJ7_MOUSE         | Transmembrane protein 87A OS=Mus musculus OX=10090 GN=Tmem87a PE=1 SV=1                                      | MOUSE | 1 |
| 3040 | 1.47 | 1.56 | 25.90 | 9.35  | tr F7CCI4 F7CCI4_MOUSE         | Female-lethal(2)D homolog (Fragment) OS=Mus musculus OX=10090 GN=Wtap PE=1 SV=1                              | MOUSE | 1 |
| 3041 | 1.47 | 1.55 | 17.71 | 17.71 | tr A0A2I3BRK6 A0A2I3BRK6_MOUSE | Transcription and mRNA export factor ENY2 OS=Mus musculus OX=10090 GN=Eny2 PE=1 SV=1                         | MOUSE | 1 |
| 3042 | 1.46 | 1.6  | 14.40 | 14.40 | tr Q80UU0 Q80UU0_MOUSE         | Golgi SNAP receptor complex member 1 OS=Mus musculus OX=10090 GN=Gosr1 PE=2 SV=1                             | MOUSE | 2 |
| 3043 | 1.46 | 1.54 | 55.22 | 40.30 | tr D3Z7Q3 D3Z7Q3_MOUSE         | Guanine nucleotide-binding protein subunit gamma OS=Mus musculus OX=10090 GN=Gng5 PE=1 SV=1                  | MOUSE | 1 |
| 3044 | 1.46 | 1.54 | 4.03  | 4.03  | tr Q4KL28 Q4KL28_MOUSE         | Granzyme G OS=Mus musculus OX=10090 GN=Gzmg PE=2 SV=1                                                        | MOUSE | 1 |
| 3045 | 1.46 | 1.54 | 13.79 | 13.79 | tr G3UW70 G3UW70_MOUSE         | Late endosomal/lysosomal adaptor and MAPK and MTOR activator 5 OS=Mus musculus OX=10090 GN=Lamtor5 PE=1 SV=1 | MOUSE | 1 |
| 3046 | 1.45 | 4.92 | 7.49  | 3.91  | tr Q6AXB7 Q6AXB7_MOUSE         | Synaptic functional regulator FMR1 OS=Mus musculus OX=10090 GN=Fmr1 PE=1 SV=1                                | MOUSE | 3 |
| 3047 | 1.44 | 1.68 | 6.11  | 0.88  | sp Q6GQT1 A2MG_MOUSE           | Alpha-2-macroglobulin-P OS=Mus musculus OX=10090 GN=A2m PE=2 SV=2                                            | MOUSE | 1 |

|      |      |      |       |       |                                |                                                                                                       |       |   |
|------|------|------|-------|-------|--------------------------------|-------------------------------------------------------------------------------------------------------|-------|---|
| 3048 | 1.44 | 1.62 | 6.04  | 1.98  | tr A0A0X1KG60 A0A0X1KG60_MOUSE | E3 ubiquitin protein ligase OS=Mus musculus OX=10090 GN=Rnf40 PE=1 SV=1                               | MOUSE | 2 |
| 3049 | 1.44 | 1.59 | 6.71  | 1.19  | tr Q8BND1 Q8BND1_MOUSE         | cGMP-dependent protein kinase OS=Mus musculus OX=10090 GN=Prkg1 PE=2 SV=1                             | MOUSE | 1 |
| 3050 | 1.44 | 1.52 | 2.56  | 1.15  | tr Q5U4B1 Q5U4B1_MOUSE         | Replication factor C subunit 1 OS=Mus musculus OX=10090 GN=Rfc1 PE=1 SV=1                             | MOUSE | 1 |
| 3051 | 1.44 | 1.52 | 4.68  | 4.68  | sp Q99J39 DCMC_MOUSE           | Malonyl-CoA decarboxylase, mitochondrial OS=Mus musculus OX=10090 GN=Mlycd PE=1 SV=1                  | MOUSE | 1 |
| 3052 | 1.44 | 1.52 | 6.39  | 6.39  | sp Q3V038 TTC9A_MOUSE          | Tetratricopeptide repeat protein 9A OS=Mus musculus OX=10090 GN=Ttc9 PE=1 SV=1                        | MOUSE | 1 |
| 3053 | 1.43 | 3.63 | 21.50 | 8.14  | tr Q3UNF2 Q3UNF2_MOUSE         | Serine/threonine-protein phosphatase OS=Mus musculus OX=10090 GN=Ppp4c PE=1 SV=1                      | MOUSE | 2 |
| 3054 | 1.43 | 1.55 | 27.45 | 12.75 | tr A0A2I3BRW0 A0A2I3BRW0_MOUSE | Microsomal signal peptidase 12 kDa subunit OS=Mus musculus OX=10090 GN=Spcs1 PE=1 SV=1                | MOUSE | 1 |
| 3055 | 1.43 | 1.52 | 6.08  | 1.52  | sp Q3UIL6 PKHA7_MOUSE          | Pleckstrin homology domain-containing family A member 7 OS=Mus musculus OX=10090 GN=Plekha7 PE=1 SV=2 | MOUSE | 1 |
| 3056 | 1.43 | 1.52 | 9.00  | 9.00  | sp O09114 PTGDS_MOUSE          | Prostaglandin-H2 D-isomerase OS=Mus musculus OX=10090 GN=Ptgds PE=1 SV=1                              | MOUSE | 1 |
| 3057 | 1.43 | 1.51 | 4.31  | 2.15  | sp Q91Z92 B3GT6_MOUSE          | Beta-1,3-galactosyltransferase 6 OS=Mus musculus OX=10090 GN=B3galt6 PE=2 SV=1                        | MOUSE | 1 |
| 3058 | 1.43 | 1.51 | 4.11  | 1.88  | sp Q8R3Y8 I2BP1_MOUSE          | Interferon regulatory factor 2-binding protein 1 OS=Mus musculus OX=10090 GN=Irf2bp1 PE=1 SV=2        | MOUSE | 1 |
| 3059 | 1.43 | 1.5  | 3.32  | 2.06  | tr E9Q5M4 E9Q5M4_MOUSE         | Zinc finger RNA-binding protein 2 OS=Mus musculus OX=10090 GN=Zfr2 PE=1 SV=1                          | MOUSE | 1 |
| 3060 | 1.42 | 1.58 | 11.66 | 4.24  | tr G3XA48 G3XA48_MOUSE         | Isopentenyl-diphosphate Delta-isomerase OS=Mus musculus OX=10090 GN=Idi1 PE=1 SV=1                    | MOUSE | 1 |
| 3061 | 1.42 | 1.52 | 12.64 | 3.72  | tr Q5I940 Q5I940_MOUSE         | USE1-like protein (Fragment) OS=Mus musculus OX=10090 GN=Use1 PE=2 SV=1                               | MOUSE | 1 |
| 3062 | 1.42 | 1.51 | 9.07  | 5.01  | sp Q8BYN3 ITPK1_MOUSE          | Inositol-tetrakisphosphate 1-kinase OS=Mus musculus OX=10090 GN=Itpk1 PE=2 SV=1                       | MOUSE | 1 |
| 3063 | 1.41 | 1.55 | 5.36  | 1.28  | sp Q6ZPE2 MTMR5_MOUSE          | Myotubularin-related protein 5 OS=Mus musculus OX=10090 GN=Sbf1 PE=1 SV=2                             | MOUSE | 2 |

|      |      |      |       |      |                                |                                                                                                      |       |   |
|------|------|------|-------|------|--------------------------------|------------------------------------------------------------------------------------------------------|-------|---|
| 3064 | 1.41 | 1.53 | 8.99  | 4.61 | tr B9EIE9 B9EIE9_MOUSE         | Adenylosuccinate synthetase isozyme 2 OS=Mus musculus<br>OX=10090 GN=Adss PE=1 SV=1                  | MOUSE | 1 |
| 3065 | 1.41 | 1.53 | 20.00 | 4.50 | sp Q9JM14 NT5C_MOUSE           | 5'(3')-deoxyribonucleotidase, cytosolic type OS=Mus<br>musculus OX=10090 GN=Nt5c PE=1 SV=1           | MOUSE | 1 |
| 3066 | 1.4  | 1.56 | 3.39  | 0.97 | sp Q920R0 ALS2_MOUSE           | Alsin OS=Mus musculus OX=10090 GN=Als2 PE=1 SV=3                                                     | MOUSE | 1 |
| 3067 | 1.4  | 1.54 | 21.57 | 9.80 | sp Q9CPZ6 ORML3_MOUSE          | ORM1-like protein 3 OS=Mus musculus OX=10090<br>GN=Ormdl3 PE=2 SV=1                                  | MOUSE | 1 |
| 3068 | 1.4  | 1.54 | 2.24  | 2.24 | sp Q7TMI3 UHRF2_MOUSE          | E3 ubiquitin-protein ligase UHRF2 OS=Mus musculus<br>OX=10090 GN=Uhrf2 PE=1 SV=1                     | MOUSE | 2 |
| 3069 | 1.4  | 1.52 | 6.79  | 2.91 | sp Q6PHU5 SORT_MOUSE           | Sortilin OS=Mus musculus OX=10090 GN=Sort1 PE=1 SV=1                                                 | MOUSE | 2 |
| 3070 | 1.4  | 1.49 | 7.34  | 2.45 | tr A0A024QYR9 A0A024QYR9_MOUSE | Phosphatidylinositol-3,4,5-trisphosphate 3-phosphatase<br>OS=Mus musculus OX=10090 GN=Pten PE=2 SV=1 | MOUSE | 1 |
| 3071 | 1.4  | 1.49 | 7.69  | 4.00 | tr A0A0A0MQF5 A0A0A0MQF5_MOUSE | Ubiquitinyl hydrolase 1 OS=Mus musculus OX=10090<br>GN=Otud6b PE=1 SV=1                              | MOUSE | 1 |
| 3072 | 1.4  | 1.48 | 24.84 | 7.19 | tr Q9JIF6 Q9JIF6_MOUSE         | Geranylgeranyl transferase type-2 subunit beta OS=Mus<br>musculus OX=10090 GN=Rabggtb PE=1 SV=1      | MOUSE | 1 |
| 3073 | 1.4  | 1.48 | 2.61  | 1.68 | tr Q6GQW1 Q6GQW1_MOUSE         | Slc4a1ap protein (Fragment) OS=Mus musculus OX=10090<br>GN=Slc4a1ap PE=2 SV=1                        | MOUSE | 1 |
| 3074 | 1.38 | 1.52 | 13.27 | 1.55 | sp P97364 SPS2_MOUSE           | Selenide, water dikinase 2 OS=Mus musculus OX=10090<br>GN=Seps2 PE=1 SV=3                            | MOUSE | 1 |
| 3075 | 1.38 | 1.47 | 3.31  | 2.25 | tr Q8K0E2 Q8K0E2_MOUSE         | Exocyst complex component 3 OS=Mus musculus OX=10090<br>GN=Exoc3 PE=1 SV=1                           | MOUSE | 1 |
| 3076 | 1.38 | 1.47 | 13.59 | 8.74 | tr Q3U0H6 Q3U0H6_MOUSE         | Uncharacterized protein (Fragment) OS=Mus musculus<br>OX=10090 GN=Tmem199 PE=2 SV=1                  | MOUSE | 1 |
| 3077 | 1.38 | 1.46 | 6.24  | 6.24 | sp Q8K070 SAM14_MOUSE          | Sterile alpha motif domain-containing protein 14 OS=Mus<br>musculus OX=10090 GN=Samd14 PE=1 SV=1     | MOUSE | 3 |
| 3078 | 1.37 | 1.69 | 10.62 | 9.33 | sp Q8K0G5 EIPR1_MOUSE          | EARP and GARP complex-interacting protein 1 OS=Mus<br>musculus OX=10090 GN=Eipr1 PE=1 SV=2           | MOUSE | 2 |
| 3079 | 1.37 | 1.48 | 3.32  | 0.68 | sp O35126 ATN1_MOUSE           | Atrophin-1 OS=Mus musculus OX=10090 GN=Atn1 PE=1<br>SV=1                                             | MOUSE | 1 |

|      |      |       |       |       |                                |                                                                                                                  |       |    |
|------|------|-------|-------|-------|--------------------------------|------------------------------------------------------------------------------------------------------------------|-------|----|
| 3080 | 1.37 | 1.44  | 5.67  | 3.12  | tr Q8CJ24 Q8CJ24_MOUSE         | Brain mitochondrial carrier protein short-inserted form OS=Mus musculus OX=10090 GN=Slc25a14 PE=2 SV=2           | MOUSE | 1  |
| 3081 | 1.37 | 1.44  | 4.78  | 4.78  | tr Q3U4R0 Q3U4R0_MOUSE         | Secretory carrier-associated membrane protein OS=Mus musculus OX=10090 GN=Scamp4 PE=2 SV=1                       | MOUSE | 1  |
| 3082 | 1.37 | 1.44  | 25.71 | 25.71 | tr H3BLR9 H3BLR9_MOUSE         | Ribonuclease kappa OS=Mus musculus OX=10090 GN=Rnasek PE=4 SV=1                                                  | MOUSE | 1  |
| 3083 | 1.37 | 1.44  | 4.67  | 4.67  | sp Q9EQQ2 YIPF5_MOUSE          | Protein YIPF5 OS=Mus musculus OX=10090 GN=Yipf5 PE=1 SV=1                                                        | MOUSE | 1  |
| 3084 | 1.36 | 1.56  | 10.74 | 2.13  | tr A0A0R4J150 A0A0R4J150_MOUSE | Oxysterol-binding protein OS=Mus musculus OX=10090 GN=Osbp18 PE=1 SV=1                                           | MOUSE | 1  |
| 3085 | 1.36 | 1.45  | 13.08 | 2.82  | sp Q8CE96 TRM6_MOUSE           | tRNA (adenine(58)-N(1))-methyltransferase non-catalytic subunit TRM6 OS=Mus musculus OX=10090 GN=Trmt6 PE=1 SV=1 | MOUSE | 1  |
| 3086 | 1.35 | 1.47  | 8.56  | 1.82  | tr B8X349 B8X349_MOUSE         | JNK-interacting leucine zipper protein long form OS=Mus musculus OX=10090 GN=Spag9 PE=2 SV=1                     | MOUSE | 1  |
| 3087 | 1.35 | 1.44  | 12.37 | 6.19  | tr A0A0G2JGE1 A0A0G2JGE1_MOUSE | Cysteine-S-conjugate beta-lyase 2 (Fragment) OS=Mus musculus OX=10090 GN=Kyat3 PE=1 SV=1                         | MOUSE | 1  |
| 3088 | 1.35 | 1.43  | 10.08 | 6.98  | tr Q0VF50 Q0VF50_MOUSE         | Complement component 1, q subcomponent-like 1 OS=Mus musculus OX=10090 GN=C1q11 PE=2 SV=1                        | MOUSE | 1  |
| 3089 | 1.34 | 36.44 | 40.27 | 32.67 | tr Q3U484 Q3U484_MOUSE         | RNA helicase OS=Mus musculus OX=10090 GN=Ddx3y PE=2 SV=1                                                         | MOUSE | 20 |
| 3090 | 1.34 | 16    | 67.59 | 48.15 | tr Q9DB48 Q9DB48_MOUSE         | Uncharacterized protein OS=Mus musculus OX=10090 GN=Rab2b PE=2 SV=1                                              | MOUSE | 10 |
| 3091 | 1.34 | 1.49  | 8.47  | 1.32  | sp Q9QXW9 LAT2_MOUSE           | Large neutral amino acids transporter small subunit 2 OS=Mus musculus OX=10090 GN=Slc7a8 PE=1 SV=1               | MOUSE | 1  |
| 3092 | 1.34 | 1.48  | 12.16 | 12.16 | sp Q9D142 NUD14_MOUSE          | Uridine diphosphate glucose pyrophosphatase NUDT14 OS=Mus musculus OX=10090 GN=Nudt14 PE=1 SV=1                  | MOUSE | 2  |
| 3093 | 1.34 | 1.43  | 7.28  | 4.11  | tr Q6NS54 Q6NS54_MOUSE         | Na(+)/H(+) exchange regulatory cofactor NHE-RF OS=Mus musculus OX=10090 GN=Slc9a3r2 PE=1 SV=1                    | MOUSE | 1  |
| 3094 | 1.34 | 1.43  | 21.51 | 12.79 | tr Q545H3 Q545H3_MOUSE         | Mitochondrial import inner membrane translocase subunit TIM17 OS=Mus musculus OX=10090 GN=Timm17b PE=1 SV=1      | MOUSE | 1  |
| 3095 | 1.34 | 1.42  | 4.81  | 2.03  | sp Q9R0N6-2 SYT8_MOUSE         | Isoform 2 of Synaptotagmin-8 OS=Mus musculus OX=10090 GN=Synt8                                                   | MOUSE | 1  |

|      |      |       |       |       |                                |                                                                                                          |       |    |
|------|------|-------|-------|-------|--------------------------------|----------------------------------------------------------------------------------------------------------|-------|----|
| 3096 | 1.33 | 1.45  | 15.78 | 3.41  | sp O35654 DPOD2_MOUSE          | DNA polymerase delta subunit 2 OS=Mus musculus<br>OX=10090 GN=Pold2 PE=1 SV=2                            | MOUSE | 1  |
| 3097 | 1.33 | 1.41  | 4.40  | 2.78  | tr Q3U2U4 Q3U2U4_MOUSE         | S5 DRBM domain-containing protein OS=Mus musculus<br>OX=10090 GN=Mrps5 PE=2 SV=1                         | MOUSE | 1  |
| 3098 | 1.32 | 23.13 | 35.55 | 21.96 | tr B7U582 B7U582_MOUSE         | Heat shock protein 70-2 OS=Mus musculus OX=10090 PE=3<br>SV=1                                            | MOUSE | 23 |
| 3099 | 1.32 | 1.44  | 8.33  | 3.41  | tr A0A0R4J215 A0A0R4J215_MOUSE | Coiled-coil domain-containing protein 75 OS=Mus musculus<br>OX=10090 GN=Gpatch11 PE=1 SV=1               | MOUSE | 1  |
| 3100 | 1.32 | 1.42  | 2.63  | 1.39  | tr E9QMK9 E9QMK9_MOUSE         | D-glutamate cyclase, mitochondrial OS=Mus musculus<br>OX=10090 GN=Dglucy PE=1 SV=1                       | MOUSE | 1  |
| 3101 | 1.31 | 18.79 | 45.51 | 21.16 | tr B2RTL5 B2RTL5_MOUSE         | Aldehyde dehydrogenase family 1, subfamily A7 OS=Mus<br>musculus OX=10090 GN=Aldh1a7 PE=1 SV=1           | MOUSE | 11 |
| 3102 | 1.31 | 1.45  | 4.94  | 2.66  | sp Q920A7 AFG31_MOUSE          | AFG3-like protein 1 OS=Mus musculus OX=10090<br>GN=Afg3l1 PE=1 SV=2                                      | MOUSE | 2  |
| 3103 | 1.3  | 1.38  | 5.99  | 5.99  | tr Q8C521 Q8C521_MOUSE         | RING-type E3 ubiquitin transferase OS=Mus musculus<br>OX=10090 GN=Rnf114 PE=2 SV=1                       | MOUSE | 1  |
| 3104 | 1.3  | 1.37  | 5.64  | 1.59  | tr G3UZF7 G3UZF7_MOUSE         | (E2-independent) E3 ubiquitin-conjugating enzyme FATS<br>OS=Mus musculus OX=10090 GN=D7Ert443e PE=1 SV=1 | MOUSE | 1  |
| 3105 | 1.29 | 5.56  | 17.24 | 11.33 | tr A0A068BFS4 A0A068BFS4_MOUSE | E3 ubiquitin-protein ligase RING1 OS=Mus musculus<br>OX=10090 GN=Ring1 PE=2 SV=1                         | MOUSE | 3  |
| 3106 | 1.29 | 1.48  | 24.53 | 4.35  | sp Q9D9V3 ECHD1_MOUSE          | Ethylmalonyl-CoA decarboxylase OS=Mus musculus<br>OX=10090 GN=Echdc1 PE=1 SV=2                           | MOUSE | 1  |
| 3107 | 1.29 | 1.48  | 7.35  | 3.99  | sp Q9JLR1 S61A2_MOUSE          | Protein transport protein Sec61 subunit alpha isoform 2<br>OS=Mus musculus OX=10090 GN=Sec61a2 PE=2 SV=3 | MOUSE | 2  |
| 3108 | 1.28 | 1.4   | 14.42 | 4.81  | tr Q3TPX5 Q3TPX5_MOUSE         | Uncharacterized protein OS=Mus musculus OX=10090<br>GN=Mras PE=1 SV=1                                    | MOUSE | 1  |
| 3109 | 1.27 | 1.38  | 4.51  | 0.94  | tr Q3UR91 Q3UR91_MOUSE         | Pumilio homolog 2 OS=Mus musculus OX=10090<br>GN=Pum2 PE=1 SV=1                                          | MOUSE | 1  |
| 3110 | 1.27 | 1.38  | 7.75  | 2.91  | tr Q8CAQ9 Q8CAQ9_MOUSE         | Exocyst complex component Sec8 OS=Mus musculus<br>OX=10090 GN=Exoc4 PE=2 SV=1                            | MOUSE | 1  |
| 3111 | 1.27 | 1.35  | 36.54 | 15.38 | tr Q6VEU5 Q6VEU5_MOUSE         | H+ transporting F1 ATP synthase epsilon subunit OS=Mus<br>musculus OX=10090 GN=Atp5e PE=2 SV=1           | MOUSE | 1  |
| 3112 | 1.27 | 1.35  | 9.85  | 4.93  | tr Q3UEK9 Q3UEK9_MOUSE         | Alpha-2-HS-glycoprotein OS=Mus musculus OX=10090<br>GN=Ahs2 PE=1 SV=1                                    | MOUSE | 1  |



|      |      |      |       |       |                                    |                                                                                                          |       |   |
|------|------|------|-------|-------|------------------------------------|----------------------------------------------------------------------------------------------------------|-------|---|
| 3113 | 1.27 | 1.35 | 26.97 | 26.97 | sp O54962 BAF_MO<br>USE            | Barrier-to-autointegration factor OS=Mus musculus<br>OX=10090 GN=Banf1 PE=1 SV=1                         | MOUSE | 1 |
| 3114 | 1.26 | 2.04 | 11.71 | 7.28  | tr Q8K0B7 Q8K0B7_<br>MOUSE         | Solute carrier family 25, member 32 OS=Mus musculus<br>OX=10090 GN=Slc25a32 PE=2 SV=1                    | MOUSE | 2 |
| 3115 | 1.26 | 1.66 | 1.93  | 1.29  | sp Q62415 ASPP1_M<br>OUSE          | Apoptosis-stimulating of p53 protein 1 OS=Mus musculus<br>OX=10090 GN=Ppp1r13b PE=1 SV=2                 | MOUSE | 1 |
| 3116 | 1.25 | 1.36 | 7.30  | 1.41  | sp P55012 S12A2_M<br>OUSE          | Solute carrier family 12 member 2 OS=Mus musculus<br>OX=10090 GN=Slc12a2 PE=1 SV=2                       | MOUSE | 1 |
| 3117 | 1.25 | 1.34 | 12.77 | 3.74  | tr G3X9A7 G3X9A7_<br>MOUSE         | PI-PLC X domain-containing protein 3 OS=Mus musculus<br>OX=10090 GN=Plcx3 PE=1 SV=1                      | MOUSE | 1 |
| 3118 | 1.25 | 1.33 | 15.00 | 2.50  | tr Q3TZ63 Q3TZ63_<br>MOUSE         | Uncharacterized protein OS=Mus musculus OX=10090<br>GN=Tbc1d13 PE=1 SV=1                                 | MOUSE | 1 |
| 3119 | 1.25 | 1.33 | 1.92  | 1.92  | tr A0JLY3 A0JLY3_<br>MOUSE         | Christmas factor (Fragment) OS=Mus musculus OX=10090<br>GN=F9 PE=2 SV=1                                  | MOUSE | 1 |
| 3120 | 1.24 | 1.41 | 9.86  | 1.59  | tr A0A2R8VK76 A0<br>A2R8VK76_MOUSE | Cleavage and polyadenylation-specificity factor subunit 1<br>OS=Mus musculus OX=10090 GN=Cpsf1 PE=1 SV=1 | MOUSE | 1 |
| 3121 | 1.24 | 1.38 | 11.67 | 2.38  | sp Q8BHS3 RBM22_<br>MOUSE          | Pre-mRNA-splicing factor RBM22 OS=Mus musculus<br>OX=10090 GN=Rbm22 PE=1 SV=1                            | MOUSE | 1 |
| 3122 | 1.23 | 1.36 | 7.91  | 1.78  | tr E9PX94 E9PX94_<br>MOUSE         | Coiled-coil and C2 domain-containing protein 1A OS=Mus<br>musculus OX=10090 GN=Cc2d1a PE=1 SV=2          | MOUSE | 1 |
| 3123 | 1.23 | 1.35 | 8.00  | 2.00  | sp Q8BVU5 NUDT9_<br>MOUSE          | ADP-ribose pyrophosphatase, mitochondrial OS=Mus<br>musculus OX=10090 GN=Nudt9 PE=1 SV=1                 | MOUSE | 1 |
| 3124 | 1.23 | 1.33 | 7.92  | 2.58  | tr Q9DCC1 Q9DCC1_<br>MOUSE         | mRNA-capping enzyme OS=Mus musculus OX=10090<br>GN=Rngtt PE=1 SV=1                                       | MOUSE | 1 |
| 3125 | 1.23 | 1.33 | 21.88 | 6.25  | tr H3BK03 H3BK03_<br>MOUSE         | Paraoxonase (Fragment) OS=Mus musculus OX=10090<br>GN=Pon1 PE=1 SV=9                                     | MOUSE | 2 |
| 3126 | 1.23 | 1.33 | 10.90 | 2.93  | sp Q61048 WBP4_M<br>OUSE           | WW domain-binding protein 4 OS=Mus musculus<br>OX=10090 GN=Wbp4 PE=1 SV=4                                | MOUSE | 1 |
| 3127 | 1.22 | 2.88 | 6.36  | 2.59  | tr Q99KA8 Q99KA8_<br>MOUSE         | Receptor protein-tyrosine kinase OS=Mus musculus<br>OX=10090 GN=Epha4 PE=2 SV=1                          | MOUSE | 2 |
| 3128 | 1.22 | 1.35 | 5.96  | 0.88  | tr A0A0R4J2D3 A0A<br>0R4J2D3_MOUSE | Transport and Golgi organization protein 1 homolog<br>OS=Mus musculus OX=10090 GN=Mia3 PE=1 SV=3         | MOUSE | 1 |
| 3129 | 1.21 | 1.33 | 9.28  | 1.38  | tr H3BKN0 H3BKN0_<br>MOUSE         | NOL1/NOP2/Sun domain family member 2 OS=Mus<br>musculus OX=10090 GN=Nsun2 PE=1 SV=1                      | MOUSE | 1 |

|      |      |      |       |       |                             |                                                                                                            |       |   |
|------|------|------|-------|-------|-----------------------------|------------------------------------------------------------------------------------------------------------|-------|---|
| 3130 | 1.21 | 1.3  | 23.44 | 4.79  | tr Q9CXU4 Q9CXU4_MOUSE      | Mitochondrial import inner membrane translocase subunit TIM23 OS=Mus musculus OX=10090 GN=Timm23 PE=1 SV=1 | MOUSE | 1 |
| 3131 | 1.21 | 1.29 | 20.00 | 11.00 | tr Q3U1A4 Q3U1A4_MOUSE      | Uncharacterized protein (Fragment) OS=Mus musculus OX=10090 GN=Rabif PE=2 SV=1                             | MOUSE | 1 |
| 3132 | 1.2  | 1.54 | 6.51  | 2.26  | tr Q3U3S0 Q3U3S0_MOUSE      | WD_REPEATS_REGION domain-containing protein OS=Mus musculus OX=10090 GN=Strn4 PE=2 SV=1                    | MOUSE | 1 |
| 3133 | 1.2  | 1.29 | 6.69  | 2.02  | sp Q8CH02 SUGP1_MOUSE       | SURP and G-patch domain-containing protein 1 OS=Mus musculus OX=10090 GN=Sugp1 PE=1 SV=1                   | MOUSE | 1 |
| 3134 | 1.2  | 1.28 | 7.04  | 4.22  | tr D3Z1F7 D3Z1F7_MOUSE      | Putative monooxygenase p33MONOX OS=Mus musculus OX=10090 GN=4833439L19Rik PE=1 SV=1                        | MOUSE | 1 |
| 3135 | 1.2  | 1.28 | 4.04  | 1.49  | RRRRRtr A2BFG8 A2BFG8_MOUSE | REVERSED Zinc finger protein 971 OS=Mus musculus OX=10090 GN=Zfp971 PE=1 SV=1                              | MOUSE | 1 |
| 3136 | 1.19 | 1.29 | 20.87 | 11.30 | tr Z4YKM2 Z4YKM2_MOUSE      | CDGSH iron-sulfur domain-containing protein 3, mitochondrial OS=Mus musculus OX=10090 GN=Cisd3 PE=1 SV=1   | MOUSE | 1 |
| 3137 | 1.19 | 1.28 | 10.34 | 10.34 | tr D3Z198 D3Z198_MOUSE      | 28S ribosomal protein S17, mitochondrial (Fragment) OS=Mus musculus OX=10090 GN=Mrps17 PE=1 SV=1           | MOUSE | 1 |
| 3138 | 1.19 | 1.27 | 9.61  | 5.65  | tr Q3THH3 Q3THH3_MOUSE      | MRP-S23 domain-containing protein OS=Mus musculus OX=10090 GN=Mrps23 PE=2 SV=1                             | MOUSE | 1 |
| 3139 | 1.18 | 1.29 | 23.53 | 19.61 | tr Q505A8 Q505A8_MOUSE      | Ribosomal protein L39 OS=Mus musculus OX=10090 GN=Rpl39 PE=1 SV=1                                          | MOUSE | 1 |
| 3140 | 1.18 | 1.27 | 1.87  | 0.71  | tr Q0VF51 Q0VF51_MOUSE      | Regulating synaptic membrane exocytosis protein 2 OS=Mus musculus OX=10090 GN=Rims2 PE=1 SV=1              | MOUSE | 1 |
| 3141 | 1.17 | 1.26 | 7.67  | 2.36  | tr D3YVU0 D3YVU0_MOUSE      | Ubiquitin carboxyl-terminal hydrolase 46 OS=Mus musculus OX=10090 GN=Usp46 PE=1 SV=1                       | MOUSE | 1 |
| 3142 | 1.17 | 1.25 | 11.27 | 8.45  | tr F6ZXW2 F6ZXW2_MOUSE      | Family with sequence similarity 98, member C (Fragment) OS=Mus musculus OX=10090 GN=Fam98c PE=1 SV=1       | MOUSE | 1 |
| 3143 | 1.17 | 1.25 | 14.04 | 14.04 | tr H7BWZ1 H7BWZ1_MOUSE      | Ubiquitin-fold modifier 1 OS=Mus musculus OX=10090 GN=Ufm1 PE=1 SV=1                                       | MOUSE | 1 |
| 3144 | 1.17 | 1.24 | 4.11  | 4.11  | tr Q8VI86 Q8VI86_MOUSE      | COMM domain-containing protein 1 OS=Mus musculus OX=10090 GN=Commd1 PE=1 SV=1                              | MOUSE | 1 |

|      |      |      |       |       |                                |                                                                                                                 |       |   |
|------|------|------|-------|-------|--------------------------------|-----------------------------------------------------------------------------------------------------------------|-------|---|
| 3145 | 1.16 | 4.65 | 9.79  | 8.01  | tr Q6DFY2 Q6DFY2_MOUSE         | Opioid-binding protein/cell adhesion molecule-like OS=Mus musculus OX=10090 GN=Opcml PE=1 SV=1                  | MOUSE | 3 |
| 3146 | 1.16 | 1.28 | 5.95  | 2.73  | tr Q3UV20 Q3UV20_MOUSE         | MAM domain-containing glycosylphosphatidylinositol anchor protein 2 OS=Mus musculus OX=10090 GN=Mdga2 PE=1 SV=1 | MOUSE | 2 |
| 3147 | 1.16 | 1.25 | 17.24 | 9.85  | tr Q2NL54 Q2NL54_MOUSE         | Uncharacterized protein OS=Mus musculus OX=10090 GN=Mrgbp PE=2 SV=1                                             | MOUSE | 2 |
| 3148 | 1.16 | 1.25 | 11.29 | 2.82  | tr F8WI12 F8WI12_MOUSE         | Upstream stimulatory factor 2 OS=Mus musculus OX=10090 GN=Usf2 PE=1 SV=1                                        | MOUSE | 1 |
| 3149 | 1.16 | 1.25 | 5.00  | 2.61  | tr A0A1W2P7K6 A0A1W2P7K6_MOUSE | Rab-3A-interacting protein OS=Mus musculus OX=10090 GN=Rab3ip PE=1 SV=1                                         | MOUSE | 1 |
| 3150 | 1.15 | 1.27 | 7.52  | 7.52  | tr Q0VAW6 Q0VAW6_MOUSE         | RIKEN cDNA 8030462N17 gene OS=Mus musculus OX=10090 GN=8030462N17Rik PE=1 SV=1                                  | MOUSE | 2 |
| 3151 | 1.15 | 1.23 | 1.65  | 0.87  | tr Q8C4G3 Q8C4G3_MOUSE         | Phospholipid-transporting ATPase OS=Mus musculus OX=10090 GN=Atp9a PE=1 SV=1                                    | MOUSE | 1 |
| 3152 | 1.14 | 3.5  | 26.25 | 17.08 | tr Q3TYL7 Q3TYL7_MOUSE         | DnaJ homolog subfamily B member 1 OS=Mus musculus OX=10090 GN=Dnajb1 PE=1 SV=1                                  | MOUSE | 4 |
| 3153 | 1.14 | 1.35 | 8.05  | 3.17  | sp Q9CW79 GOGA1_MOUSE          | Golgin subfamily A member 1 OS=Mus musculus OX=10090 GN=Golga1 PE=1 SV=2                                        | MOUSE | 2 |
| 3154 | 1.14 | 1.23 | 10.21 | 2.70  | tr Q3TMC4 Q3TMC4_MOUSE         | Solute carrier family 25 member 44 OS=Mus musculus OX=10090 GN=Slc25a44 PE=1 SV=1                               | MOUSE | 1 |
| 3155 | 1.13 | 1.3  | 17.43 | 1.95  | tr G3UXM5 G3UXM5_MOUSE         | Serine/threonine-protein kinase BRSK2 (Fragment) OS=Mus musculus OX=10090 GN=Brsk2 PE=1 SV=1                    | MOUSE | 1 |
| 3156 | 1.13 | 1.27 | 4.85  | 0.87  | tr F8VQJ3 F8VQJ3_MOUSE         | Laminin subunit gamma-1 OS=Mus musculus OX=10090 GN=Lamc1 PE=1 SV=1                                             | MOUSE | 1 |
| 3157 | 1.13 | 1.27 | 38.18 | 30.00 | tr E0CY88 E0CY88_MOUSE         | Cytochrome b5 OS=Mus musculus OX=10090 GN=Cyb5a PE=1 SV=1                                                       | MOUSE | 2 |
| 3158 | 1.13 | 1.23 | 4.85  | 1.25  | tr F6T836 F6T836_MOUSE         | Rho GTPase-activating protein 26 OS=Mus musculus OX=10090 GN=Arhgap26 PE=1 SV=1                                 | MOUSE | 1 |
| 3159 | 1.13 | 1.21 | 6.22  | 3.53  | sp Q921Q3 ALG1_MOUSE           | Chitobiosyldiphosphodolichol beta-mannosyltransferase OS=Mus musculus OX=10090 GN=Alg1 PE=1 SV=3                | MOUSE | 1 |
| 3160 | 1.12 | 1.24 | 12.46 | 6.67  | tr Q9D7A3 Q9D7A3_MOUSE         | Uncharacterized protein OS=Mus musculus OX=10090 GN=Rnf113a2 PE=2 SV=1                                          | MOUSE | 2 |

|      |      |      |       |       |                                |                                                                                                          |       |   |
|------|------|------|-------|-------|--------------------------------|----------------------------------------------------------------------------------------------------------|-------|---|
| 3161 | 1.12 | 1.23 | 7.62  | 1.45  | tr A0A0A6YXM5 A0A0A6YXM5_MOUSE | REST corepressor 3 OS=Mus musculus OX=10090 GN=Rcor3 PE=1 SV=1                                           | MOUSE | 1 |
| 3162 | 1.12 | 1.23 | 9.72  | 4.17  | sp Q99KR3 LACB2_MOUSE          | Endoribonuclease LACTB2 OS=Mus musculus OX=10090 GN=Lactb2 PE=1 SV=1                                     | MOUSE | 1 |
| 3163 | 1.12 | 1.2  | 36.14 | 12.05 | sp P48771 CX7A2_MOUSE          | Cytochrome c oxidase subunit 7A2, mitochondrial OS=Mus musculus OX=10090 GN=Cox7a2 PE=1 SV=2             | MOUSE | 1 |
| 3164 | 1.12 | 1.2  | 3.18  | 3.18  | sp Q9D6J3 YJU2_MOUSE           | Splicing factor YJU2 OS=Mus musculus OX=10090 GN=Yju2 PE=1 SV=1                                          | MOUSE | 1 |
| 3165 | 1.11 | 3.28 | 19.73 | 19.73 | tr Q3UFQ4 Q3UFQ4_MOUSE         | UBC core domain-containing protein OS=Mus musculus OX=10090 GN=Ube2d1 PE=2 SV=1                          | MOUSE | 5 |
| 3166 | 1.11 | 1.22 | 22.25 | 6.32  | tr Q8K2D8 Q8K2D8_MOUSE         | Acidic fibroblast growth factor intracellular-binding protein OS=Mus musculus OX=10090 GN=Fibp PE=1 SV=1 | MOUSE | 1 |
| 3167 | 1.11 | 1.2  | 16.50 | 4.85  | sp Q8BVG8 NAT14_MOUSE          | N-acetyltransferase 14 OS=Mus musculus OX=10090 GN=Nat14 PE=1 SV=1                                       | MOUSE | 1 |
| 3168 | 1.11 | 1.19 | 18.31 | 7.75  | sp P83877 TXN4A_MOUSE          | Thioredoxin-like protein 4A OS=Mus musculus OX=10090 GN=Txnl4a PE=1 SV=1                                 | MOUSE | 1 |
| 3169 | 1.1  | 1.29 | 12.19 | 1.82  | tr Q80V79 Q80V79_MOUSE         | DNA mismatch repair protein OS=Mus musculus OX=10090 GN=Msh2 PE=2 SV=1                                   | MOUSE | 2 |
| 3170 | 1.1  | 1.19 | 15.16 | 3.55  | sp B1AVZ0 UPP_MOUSE            | Uracil phosphoribosyltransferase homolog OS=Mus musculus OX=10090 GN=Uprt PE=1 SV=1                      | MOUSE | 1 |
| 3171 | 1.1  | 1.18 | 6.06  | 6.06  | sp Q9CPS6 HINT3_MOUSE          | Histidine triad nucleotide-binding protein 3 OS=Mus musculus OX=10090 GN=Hint3 PE=1 SV=1                 | MOUSE | 1 |
| 3172 | 1.1  | 1.17 | 5.53  | 5.53  | sp P70425 RIT2_MOUSE           | GTP-binding protein Rit2 OS=Mus musculus OX=10090 GN=Rit2 PE=1 SV=1                                      | MOUSE | 1 |
| 3173 | 1.09 | 1.19 | 1.74  | 0.45  | sp Q9Z2U2-2 ZN292_MOUSE        | Isoform 2 of Zinc finger protein 292 OS=Mus musculus OX=10090 GN=Zfp292                                  | MOUSE | 1 |
| 3174 | 1.09 | 1.18 | 1.49  | 0.75  | sp Q6P1E1 ZMIZ1_MOUSE          | Zinc finger MIZ domain-containing protein 1 OS=Mus musculus OX=10090 GN=Zmiz1 PE=1 SV=1                  | MOUSE | 1 |
| 3175 | 1.09 | 1.17 | 15.76 | 4.30  | sp Q60866 PTER_MOUSE           | Phosphotriesterase-related protein OS=Mus musculus OX=10090 GN=Pter PE=1 SV=1                            | MOUSE | 1 |
| 3176 | 1.09 | 1.17 | 3.15  | 1.49  | tr F7B0S9 F7B0S9_MOUSE         | Sodium/potassium/calcium exchanger 4 (Fragment) OS=Mus musculus OX=10090 GN=Slc24a4 PE=1 SV=1            | MOUSE | 1 |

|      |      |      |       |       |                                |                                                                                                                      |       |   |
|------|------|------|-------|-------|--------------------------------|----------------------------------------------------------------------------------------------------------------------|-------|---|
| 3177 | 1.09 | 1.17 | 5.38  | 2.02  | tr E9QKU9 E9QKU9_MOUSE         | Tetratricopeptide repeat protein 23 OS=Mus musculus<br>OX=10090 GN=Ttc23 PE=4 SV=1                                   | MOUSE | 1 |
| 3178 | 1.09 | 1.17 | 8.56  | 4.96  | tr E9Q2S9 E9Q2S9_MOUSE         | Coiled-coil domain-containing protein 43 OS=Mus musculus<br>OX=10090 GN=Ccdc43 PE=1 SV=1                             | MOUSE | 1 |
| 3179 | 1.09 | 1.17 | 4.72  | 4.72  | tr A0A087WRY3 A0A087WRY3_MOUSE | Nuclear ubiquitous casein and cyclin-dependent kinase<br>substrate 1 OS=Mus musculus OX=10090 GN=Nucks1 PE=1<br>SV=1 | MOUSE | 1 |
| 3180 | 1.08 | 1.2  | 13.48 | 2.14  | sp Q8R1F1 NIBA2_MOUSE          | Protein Niban 2 OS=Mus musculus OX=10090 GN=Niban2<br>PE=1 SV=2                                                      | MOUSE | 1 |
| 3181 | 1.07 | 4.88 | 7.93  | 4.06  | tr Q6NXV2 Q6NXV2_MOUSE         | Solute carrier family 12, member 4 OS=Mus musculus<br>OX=10090 GN=Slc12a4 PE=2 SV=1                                  | MOUSE | 5 |
| 3182 | 1.07 | 2.44 | 8.99  | 4.27  | tr A1KR23 A1KR23_MOUSE         | Glycine receptor beta subunit OS=Mus musculus OX=10090<br>GN=Glr1b PE=1 SV=1                                         | MOUSE | 2 |
| 3183 | 1.07 | 1.35 | 10.83 | 4.72  | tr Q91YQ8 Q91YQ8_MOUSE         | Amacr protein OS=Mus musculus OX=10090 GN=Amacr<br>PE=2 SV=1                                                         | MOUSE | 1 |
| 3184 | 1.07 | 1.2  | 3.10  | 1.13  | tr E9QPX1 E9QPX1_MOUSE         | Collagen alpha-1(XVIII) chain OS=Mus musculus OX=10090<br>GN=Col18a1 PE=1 SV=1                                       | MOUSE | 2 |
| 3185 | 1.07 | 1.15 | 16.20 | 4.22  | tr F6SQH7 F6SQH7_MOUSE         | Polymerase delta-interacting protein 2 (Fragment) OS=Mus<br>musculus OX=10090 GN=Poldip2 PE=1 SV=1                   | MOUSE | 1 |
| 3186 | 1.07 | 1.14 | 25.00 | 25.00 | tr C3VDI2 C3VDI2_MOUSE         | Etoposide induced 2.4 protein (Fragment) OS=Mus<br>musculus OX=10090 GN=Ei24 PE=4 SV=1                               | MOUSE | 1 |
| 3187 | 1.06 | 1.14 | 3.50  | 1.65  | tr A0A1S6GWK5 A0A1S6GWK5_MOUSE | GCFC domain-containing protein OS=Mus musculus<br>OX=10090 GN=Paxbp1 PE=2 SV=1                                       | MOUSE | 1 |
| 3188 | 1.05 | 1.15 | 17.99 | 4.50  | sp Q9JK23 PSMG1_MOUSE          | Proteasome assembly chaperone 1 OS=Mus musculus<br>OX=10090 GN=Psmg1 PE=1 SV=1                                       | MOUSE | 1 |
| 3189 | 1.05 | 1.14 | 6.18  | 2.13  | sp D3YZP9 CCDC6_MOUSE          | Coiled-coil domain-containing protein 6 OS=Mus musculus<br>OX=10090 GN=Ccdc6 PE=1 SV=1                               | MOUSE | 1 |
| 3190 | 1.05 | 1.13 | 21.98 | 8.62  | sp Q922M7 ASHWN_MOUSE          | Ashwin OS=Mus musculus OX=10090 PE=1 SV=1                                                                            | MOUSE | 1 |
| 3191 | 1.04 | 1.15 | 11.81 | 2.24  | sp Q9J1M13 RABX5_MOUSE         | Rab5 GDP/GTP exchange factor OS=Mus musculus<br>OX=10090 GN=Rabgef1 PE=1 SV=1                                        | MOUSE | 1 |
| 3192 | 1.04 | 1.13 | 13.20 | 9.14  | sp Q9JJV1 CRBA2_MOUSE          | Beta-crystallin A2 OS=Mus musculus OX=10090<br>GN=Cryba2 PE=2 SV=3                                                   | MOUSE | 1 |

|      |      |       |       |       |                                |                                                                                                          |       |    |
|------|------|-------|-------|-------|--------------------------------|----------------------------------------------------------------------------------------------------------|-------|----|
| 3193 | 1.04 | 1.12  | 21.74 | 13.04 | sp Q9DAM7 TM263_MOUSE          | Transmembrane protein 263 OS=Mus musculus OX=10090 GN=Tmem263 PE=1 SV=1                                  | MOUSE | 1  |
| 3194 | 1.03 | 21.36 | 69.86 | 69.52 | sp Q9JKB3-2 YBOX3_MOUSE        | Isoform 2 of Y-box-binding protein 3 OS=Mus musculus OX=10090 GN=Ybx3                                    | MOUSE | 12 |
| 3195 | 1.03 | 1.22  | 10.11 | 5.32  | tr Q9QWX2 Q9QWX2_MOUSE         | Apoptosis regulator Bcl-X (Fragment) OS=Mus musculus OX=10090 GN=Bcl2l1 PE=1 SV=1                        | MOUSE | 1  |
| 3196 | 1.03 | 1.19  | 7.46  | 2.62  | tr Q3UGC8 Q3UGC8_MOUSE         | Propanoyl-CoA:carbon dioxide ligase subunit alpha OS=Mus musculus OX=10090 GN=Pcca PE=1 SV=1             | MOUSE | 2  |
| 3197 | 1.03 | 1.12  | 8.57  | 1.32  | sp Q8R2M2 TDIF2_MOUSE          | Deoxynucleotidyltransferase terminal-interacting protein 2 OS=Mus musculus OX=10090 GN=Dnttip2 PE=1 SV=1 | MOUSE | 1  |
| 3198 | 1.03 | 1.11  | 8.09  | 2.76  | tr A2AEM2 A2AEM2_MOUSE         | Chloride channel CLIC-like protein 1 OS=Mus musculus OX=10090 GN=Clcc1 PE=1 SV=1                         | MOUSE | 1  |
| 3199 | 1.03 | 1.11  | 7.23  | 5.70  | sp O70494-3 SP3_MOUSE          | Isoform 3 of Transcription factor Sp3 OS=Mus musculus OX=10090 GN=Sp3                                    | MOUSE | 2  |
| 3200 | 1.03 | 1.1   | 2.99  | 2.99  | tr Q0H9Q2 Q0H9Q2_MOUSE         | Transcription factor Pur-1 (Fragment) OS=Mus musculus OX=10090 GN=Maz PE=2 SV=1                          | MOUSE | 1  |
| 3201 | 1.02 | 1.14  | 5.78  | 2.20  | tr Q3UFC2 Q3UFC2_MOUSE         | Anaphase-promoting complex subunit 5 OS=Mus musculus OX=10090 GN=Anapc5 PE=1 SV=1                        | MOUSE | 1  |
| 3202 | 1.02 | 1.12  | 6.73  | 4.17  | sp Q9EQC4 ELOV4_MOUSE          | Elongation of very long chain fatty acids protein 4 OS=Mus musculus OX=10090 GN=Elov14 PE=1 SV=2         | MOUSE | 2  |
| 3203 | 1.02 | 1.1   | 2.78  | 1.46  | tr Q8C0W5 Q8C0W5_MOUSE         | RNB domain-containing protein OS=Mus musculus OX=10090 GN=Dis3l2 PE=2 SV=1                               | MOUSE | 1  |
| 3204 | 1.02 | 1.1   | 1.95  | 1.95  | sp Q5XJE5 LEO1_MOUSE           | RNA polymerase-associated protein LEO1 OS=Mus musculus OX=10090 GN=Leo1 PE=1 SV=2                        | MOUSE | 2  |
| 3205 | 1.01 | 1.15  | 12.30 | 4.85  | tr S4R2D5 S4R2D5_MOUSE         | Ubiquitin-like modifier-activating enzyme ATG7 OS=Mus musculus OX=10090 GN=Atg7 PE=1 SV=1                | MOUSE | 2  |
| 3206 | 1.01 | 1.14  | 3.80  | 2.17  | tr A0A2X0SZ45 A0A2X0SZ45_MOUSE | SRGAP2 (Fragment) OS=Mus musculus OX=10090 GN=SRGAP2 PE=4 SV=1                                           | MOUSE | 2  |
| 3207 | 1.01 | 1.14  | 6.50  | 2.07  | tr D3YY38 D3YY38_MOUSE         | Probable cationic amino acid transporter OS=Mus musculus OX=10090 GN=Slc7a14 PE=1 SV=1                   | MOUSE | 1  |
| 3208 | 1.01 | 1.12  | 4.04  | 0.82  | tr F6U6U5 F6U6U5_MOUSE         | Serine/threonine-protein kinase SIK3 (Fragment) OS=Mus musculus OX=10090 GN=Sik3 PE=1 SV=1               | MOUSE | 1  |
| 3209 | 1.01 | 1.12  | 6.61  | 2.77  | tr D3YUP1 D3YUP1_MOUSE         | Coactivator-associated arginine methyltransferase 1 OS=Mus musculus OX=10090 GN=Carm1 PE=1 SV=1          | MOUSE | 1  |

|      |      |      |       |       |                                |                                                                                                              |       |   |
|------|------|------|-------|-------|--------------------------------|--------------------------------------------------------------------------------------------------------------|-------|---|
| 3210 | 1.01 | 1.11 | 2.12  | 0.45  | tr A0A140LHX5 A0A140LHX5_MOUSE | Protein unc-13 homolog B OS=Mus musculus OX=10090 GN=Unc13b PE=1 SV=1                                        | MOUSE | 1 |
| 3211 | 1.01 | 1.09 | 8.17  | 4.28  | sp Q9CZX7 PP4P2_MOUSE          | Type 2 phosphatidylinositol 4,5-bisphosphate 4-phosphatase OS=Mus musculus OX=10090 GN=Pip4p2 PE=1 SV=1      | MOUSE | 1 |
| 3212 | 1.01 | 1.09 | 2.55  | 2.55  | tr Q3UCZ5 Q3UCZ5_MOUSE         | Tyrosine-protein phosphatase non-receptor type OS=Mus musculus OX=10090 GN=Ptpn1 PE=2 SV=1                   | MOUSE | 1 |
| 3213 | 1.01 | 1.08 | 24.24 | 13.13 | tr D3Z7G3 D3Z7G3_MOUSE         | Protein FAM241B (Fragment) OS=Mus musculus OX=10090 GN=Fam241b PE=1 SV=1                                     | MOUSE | 1 |
| 3214 | 1    | 1.12 | 8.68  | 8.68  | sp Q99K23 UFSP2_MOUSE          | Ufm1-specific protease 2 OS=Mus musculus OX=10090 GN=Ufsp2 PE=1 SV=1                                         | MOUSE | 2 |
| 3215 | 1    | 1.09 | 3.09  | 1.85  | sp Q80WG5 LRC8A_MOUSE          | Volume-regulated anion channel subunit LRRC8A OS=Mus musculus OX=10090 GN=Lrrc8a PE=1 SV=1                   | MOUSE | 1 |
| 3216 | 1    | 1.08 | 2.89  | 2.89  | tr A0A3B2WDB0 A0A3B2WDB0_MOUSE | Vomeroneasal 2, receptor 82 OS=Mus musculus OX=10090 GN=Vmn2r82 PE=4 SV=1                                    | MOUSE | 1 |
| 3217 | 1    | 1.08 | 7.50  | 7.50  | sp P28667 MRP_MOUSE            | MARCKS-related protein OS=Mus musculus OX=10090 GN=Marcksl1 PE=1 SV=2                                        | MOUSE | 1 |
| 3218 | 0.99 | 1.29 | 10.91 | 2.00  | tr Q3TUQ7 Q3TUQ7_MOUSE         | Acetyl-CoA carboxylase kinase OS=Mus musculus OX=10090 GN=Prkaa1 PE=1 SV=1                                   | MOUSE | 1 |
| 3219 | 0.99 | 1.14 | 6.60  | 0.75  | sp Q5SFM8 RBM27_MOUSE          | RNA-binding protein 27 OS=Mus musculus OX=10090 GN=Rbm27 PE=1 SV=3                                           | MOUSE | 1 |
| 3220 | 0.99 | 1.1  | 10.90 | 2.32  | tr Q8BPN4 Q8BPN4_MOUSE         | AP-2 transcription factor OS=Mus musculus OX=10090 GN=Tfap2a PE=1 SV=1                                       | MOUSE | 1 |
| 3221 | 0.99 | 1.07 | 10.22 | 2.68  | tr Q08EA5 Q08EA5_MOUSE         | Serine (Or cysteine) peptidase inhibitor, clade A, member 1F OS=Mus musculus OX=10090 GN=Serpina1f PE=2 SV=1 | MOUSE | 1 |
| 3222 | 0.99 | 1.07 | 20.16 | 8.07  | tr A0A1W2P7P4 A0A1W2P7P4_MOUSE | Protein max OS=Mus musculus OX=10090 GN=Max PE=1 SV=1                                                        | MOUSE | 1 |
| 3223 | 0.99 | 1.07 | 4.42  | 4.42  | tr Q8BT06 Q8BT06_MOUSE         | Tetraspanin OS=Mus musculus OX=10090 GN=Cd63 PE=2 SV=1                                                       | MOUSE | 1 |
| 3224 | 0.98 | 1.11 | 13.94 | 5.45  | tr Q3TWR3 Q3TWR3_MOUSE         | 5'-AMP-activated protein kinase subunit gamma-1 OS=Mus musculus OX=10090 GN=Prkag1 PE=1 SV=1                 | MOUSE | 1 |

|      |      |      |       |       |                                |                                                                                                       |       |   |
|------|------|------|-------|-------|--------------------------------|-------------------------------------------------------------------------------------------------------|-------|---|
| 3225 | 0.98 | 1.07 | 6.84  | 2.04  | tr Q059U9 Q059U9_MOUSE         | A kinase (PRKA) anchor protein 8 OS=Mus musculus<br>OX=10090 GN=Akap8 PE=1 SV=1                       | MOUSE | 1 |
| 3226 | 0.98 | 1.07 | 3.85  | 1.10  | sp Q80ZI6 LRSM1_MOUSE          | E3 ubiquitin-protein ligase LRSAM1 OS=Mus musculus<br>OX=10090 GN=Lrsam1 PE=1 SV=1                    | MOUSE | 1 |
| 3227 | 0.98 | 1.06 | 4.36  | 2.82  | tr A6YR19 A6YR19_MOUSE         | Phosphodiesterase OS=Mus musculus OX=10090 GN=Pde8b<br>PE=2 SV=1                                      | MOUSE | 4 |
| 3228 | 0.97 | 1.05 | 7.66  | 4.79  | tr A0A338P7L8 A0A338P7L8_MOUSE | Charged multivesicular body protein 2b OS=Mus musculus<br>OX=10090 GN=Chmp2b PE=1 SV=1                | MOUSE | 1 |
| 3229 | 0.97 | 1.05 | 26.60 | 26.60 | sp Q9D164 FXVD6_MOUSE          | FXVD domain-containing ion transport regulator 6 OS=Mus musculus<br>OX=10090 GN=Fxyd6 PE=1 SV=2       | MOUSE | 1 |
| 3230 | 0.97 | 1.05 | 5.98  | 5.98  | sp Q9D0J4 ARL2_MOUSE           | ADP-ribosylation factor-like protein 2 OS=Mus musculus<br>OX=10090 GN=Arl2 PE=1 SV=1                  | MOUSE | 1 |
| 3231 | 0.96 | 1.09 | 7.74  | 2.15  | tr Q3UI47 Q3UI47_MOUSE         | Kinesin-like protein OS=Mus musculus OX=10090<br>GN=Kif3a PE=1 SV=1                                   | MOUSE | 1 |
| 3232 | 0.96 | 1.06 | 4.32  | 1.12  | sp Q80UF4 SDCG8_MOUSE          | Serologically defined colon cancer antigen 8 homolog OS=Mus musculus<br>OX=10090 GN=Sdccag8 PE=1 SV=1 | MOUSE | 1 |
| 3233 | 0.96 | 1.05 | 10.06 | 4.09  | sp Q9EPL4 METL9_MOUSE          | Protein-L-histidine N-pros-methyltransferase OS=Mus musculus<br>OX=10090 GN=Mettl9 PE=1 SV=1          | MOUSE | 1 |
| 3234 | 0.96 | 1.05 | 5.82  | 3.70  | tr Q8C4C9 Q8C4C9_MOUSE         | DnaJ homolog subfamily B member 12 OS=Mus musculus<br>OX=10090 GN=Dnajb12 PE=1 SV=1                   | MOUSE | 1 |
| 3235 | 0.96 | 1.04 | 7.20  | 2.73  | tr A2RSW6 A2RSW6_MOUSE         | Aminomethyltransferase OS=Mus musculus OX=10090<br>GN=Amt PE=1 SV=1                                   | MOUSE | 1 |
| 3236 | 0.95 | 1.04 | 7.13  | 2.20  | sp Q9QYE6 GOGA5_MOUSE          | Golgin subfamily A member 5 OS=Mus musculus<br>OX=10090 GN=Golga5 PE=1 SV=2                           | MOUSE | 1 |
| 3237 | 0.95 | 1.04 | 17.78 | 5.56  | sp Q8VE99 CC115_MOUSE          | Coiled-coil domain-containing protein 115 OS=Mus musculus<br>OX=10090 GN=Ccdc115 PE=1 SV=1            | MOUSE | 1 |
| 3238 | 0.95 | 1.04 | 4.78  | 3.34  | sp O35668 HAP1_MOUSE           | Huntingtin-associated protein 1 OS=Mus musculus<br>OX=10090 GN=Hap1 PE=1 SV=1                         | MOUSE | 1 |
| 3239 | 0.95 | 1.02 | 18.33 | 18.33 | tr Q80VN1 Q80VN1_MOUSE         | 1110007C09Rik protein OS=Mus musculus OX=10090<br>GN=Card19 PE=2 SV=1                                 | MOUSE | 1 |
| 3240 | 0.94 | 3.12 | 4.50  | 1.57  | tr Q3UH70 Q3UH70_MOUSE         | Bromodomain-containing protein 4 OS=Mus musculus<br>OX=10090 GN=Brd4 PE=1 SV=1                        | MOUSE | 2 |
| 3241 | 0.94 | 1.83 | 7.82  | 2.56  | tr E9QNX9 E9QNX9_MOUSE         | Tyrosine-protein kinase receptor OS=Mus musculus<br>OX=10090 GN=Igflr PE=1 SV=1                       | MOUSE | 3 |



|      |      |      |       |       |                        |                                                                                                              |       |   |
|------|------|------|-------|-------|------------------------|--------------------------------------------------------------------------------------------------------------|-------|---|
| 3242 | 0.94 | 1.28 | 72.00 | 40.00 | sp P63216 GBG3_MOUSE   | Guanine nucleotide-binding protein G(I)/G(S)/G(O) subunit gamma-3 OS=Mus musculus OX=10090 GN=Gng3 PE=1 SV=1 | MOUSE | 1 |
| 3243 | 0.94 | 1.07 | 8.09  | 1.51  | tr Q3TMH3 Q3TMH3_MOUSE | WD_REPEATS_REGION domain-containing protein OS=Mus musculus OX=10090 GN=Wdr6 PE=2 SV=1                       | MOUSE | 2 |
| 3244 | 0.94 | 1.06 | 9.38  | 1.91  | tr D3YZC2 D3YZC2_MOUSE | Menin OS=Mus musculus OX=10090 GN=Men1 PE=1 SV=1                                                             | MOUSE | 1 |
| 3245 | 0.94 | 1.02 | 5.28  | 1.96  | sp B2RQA1 KCA10_MOUSE  | Potassium voltage-gated channel subfamily A member 10 OS=Mus musculus OX=10090 GN=Kcna10 PE=2 SV=1           | MOUSE | 1 |
| 3246 | 0.94 | 1.02 | 6.31  | 3.30  | tr Q3TV62 Q3TV62_MOUSE | Torsin OS=Mus musculus OX=10090 GN=Tor1a PE=1 SV=1                                                           | MOUSE | 1 |
| 3247 | 0.94 | 1.02 | 22.22 | 11.97 | sp Q9D7J4 COX20_MOUSE  | Cytochrome c oxidase assembly protein COX20, mitochondrial OS=Mus musculus OX=10090 GN=Cox20 PE=1 SV=1       | MOUSE | 1 |
| 3248 | 0.94 | 1.02 | 5.18  | 5.18  | tr H3BLH2 H3BLH2_MOUSE | Sulfide:quinone oxidoreductase, mitochondrial (Fragment) OS=Mus musculus OX=10090 GN=Sqor PE=1 SV=1          | MOUSE | 1 |
| 3249 | 0.93 | 1.06 | 4.76  | 1.68  | sp Q9ESJ4 SPN90_MOUSE  | NCK-interacting protein with SH3 domain OS=Mus musculus OX=10090 GN=Nckipsd PE=1 SV=2                        | MOUSE | 1 |
| 3250 | 0.93 | 1.03 | 9.97  | 4.98  | sp Q8BGU5 CCNY_MOUSE   | Cyclin-Y OS=Mus musculus OX=10090 GN=Ccny PE=1 SV=1                                                          | MOUSE | 1 |
| 3251 | 0.93 | 1.01 | 5.82  | 3.27  | tr B9EJ14 B9EJ14_MOUSE | Voltage-dependent calcium channel gamma-7 subunit OS=Mus musculus OX=10090 GN=Cacng7 PE=1 SV=1               | MOUSE | 1 |
| 3252 | 0.92 | 1.04 | 6.45  | 0.63  | sp Q9JJ28 FLII_MOUSE   | Protein flightless-1 homolog OS=Mus musculus OX=10090 GN=Flil PE=1 SV=1                                      | MOUSE | 2 |
| 3253 | 0.92 | 1.01 | 12.14 | 8.09  | tr B9EKL6 B9EKL6_MOUSE | Protein tyrosine phosphatase 4a1 OS=Mus musculus OX=10090 GN=Ptp4a1 PE=1 SV=1                                | MOUSE | 1 |
| 3254 | 0.92 | 1    | 5.13  | 5.13  | sp Q9D531 NXNL2_MOUSE  | Nucleoredoxin-like protein 2 OS=Mus musculus OX=10090 GN=Nxn12 PE=1 SV=1                                     | MOUSE | 1 |
| 3255 | 0.92 | 1    | 4.27  | 4.27  | sp P70460 VASP_MOUSE   | Vasodilator-stimulated phosphoprotein OS=Mus musculus OX=10090 GN=Vasp PE=1 SV=4                             | MOUSE | 1 |
| 3256 | 0.91 | 2.5  | 4.28  | 0.88  | tr Q5SWZ5 Q5SWZ5_MOUSE | Myosin phosphatase Rho-interacting protein OS=Mus musculus OX=10090 GN=Mrip PE=1 SV=1                        | MOUSE | 2 |

|      |      |       |       |       |                                |                                                                                                                            |       |    |
|------|------|-------|-------|-------|--------------------------------|----------------------------------------------------------------------------------------------------------------------------|-------|----|
| 3257 | 0.91 | 1.41  | 11.34 | 5.09  | tr Q8R2U8 Q8R2U8_MOUSE         | Protein-serine/threonine kinase OS=Mus musculus<br>OX=10090 GN=Pdk1 PE=2 SV=1                                              | MOUSE | 2  |
| 3258 | 0.91 | 1.03  | 3.61  | 2.29  | sp Q6NVE8 WDR44_MOUSE          | WD repeat-containing protein 44 OS=Mus musculus<br>OX=10090 GN=Wdr44 PE=1 SV=1                                             | MOUSE | 2  |
| 3259 | 0.91 | 1     | 7.98  | 1.95  | sp Q4VBD2 TAPT1_MOUSE          | Transmembrane anterior posterior transformation protein 1<br>OS=Mus musculus OX=10090 GN=Tapt1 PE=1 SV=2                   | MOUSE | 1  |
| 3260 | 0.91 | 0.99  | 4.60  | 1.59  | tr A0A5H1ZRL3 A0A5H1ZRL3_MOUSE | Negative elongation factor B OS=Mus musculus OX=10090<br>GN=Nelfb PE=1 SV=1                                                | MOUSE | 1  |
| 3261 | 0.91 | 0.99  | 15.17 | 9.66  | sp Q8VHC3 SELM_MOUSE           | Selenoprotein M OS=Mus musculus OX=10090<br>GN=Selenom PE=1 SV=3                                                           | MOUSE | 1  |
| 3262 | 0.91 | 0.99  | 2.59  | 1.38  | RRRRRsp P98083 SHC1_MOUSE      | REVERSED SHC-transforming protein 1 OS=Mus musculus<br>OX=10090 GN=Shc1 PE=1 SV=3                                          | MOUSE | 1  |
| 3263 | 0.91 | 0.98  | 6.90  | 6.90  | tr Q05BF8 Q05BF8_MOUSE         | Pggt1b protein OS=Mus musculus OX=10090 GN=Pggt1b<br>PE=2 SV=1                                                             | MOUSE | 1  |
| 3264 | 0.91 | 0.98  | 0.55  | 0.55  | RRRRRsp Q5SWW4 MED13_MOUSE     | REVERSED Mediator of RNA polymerase II transcription<br>subunit 13 OS=Mus musculus OX=10090 GN=Med13 PE=1<br>SV=1          | MOUSE | 1  |
| 3265 | 0.9  | 42.28 | 49.83 | 49.48 | tr G5E8G0 G5E8G0_MOUSE         | Heterogeneous nuclear ribonucleoprotein D0 OS=Mus<br>musculus OX=10090 GN=Hnrnpd PE=1 SV=1                                 | MOUSE | 22 |
| 3266 | 0.9  | 1.07  | 7.42  | 1.85  | tr Q5SW15 Q5SW15_MOUSE         | U6 small nuclear RNA (adenine-(43)-N(6))-<br>methyltransferase OS=Mus musculus OX=10090<br>GN=Mettl16 PE=1 SV=1            | MOUSE | 1  |
| 3267 | 0.9  | 0.99  | 22.15 | 8.30  | sp Q3TQI7 TLS1_MOUSE           | Telomere length and silencing protein 1 homolog OS=Mus<br>musculus OX=10090 PE=1 SV=2                                      | MOUSE | 2  |
| 3268 | 0.9  | 0.99  | 5.13  | 2.26  | tr Q6A0E5 Q6A0E5_MOUSE         | L-serine-phosphatidylethanolamine<br>phosphatidyltransferase (Fragment) OS=Mus musculus<br>OX=10090 GN=mKIAA0024 PE=3 SV=1 | MOUSE | 1  |
| 3269 | 0.9  | 0.98  | 8.75  | 2.14  | tr Q571M3 Q571M3_MOUSE         | MKIAA4018 protein (Fragment) OS=Mus musculus<br>OX=10090 GN=Lrrc1 PE=2 SV=1                                                | MOUSE | 1  |
| 3270 | 0.9  | 0.98  | 2.42  | 1.08  | sp Q8VHK1 CSKI2_MOUSE          | Caskin-2 OS=Mus musculus OX=10090 GN=Caskin2 PE=1<br>SV=3                                                                  | MOUSE | 1  |
| 3271 | 0.9  | 0.98  | 6.19  | 6.19  | tr A0A0U1RPM3 A0A0U1RPM3_MOUSE | PRA1 family protein OS=Mus musculus OX=10090<br>GN=Rabac1 PE=1 SV=1                                                        | MOUSE | 1  |

|      |      |      |       |       |                                |                                                                                                                 |       |   |
|------|------|------|-------|-------|--------------------------------|-----------------------------------------------------------------------------------------------------------------|-------|---|
| 3272 | 0.88 | 0.99 | 9.31  | 2.00  | tr Q6F4J1 Q6F4J1_MOUSE         | Tubulin gamma chain OS=Mus musculus OX=10090 GN=Tubg1 PE=1 SV=1                                                 | MOUSE | 1 |
| 3273 | 0.87 | 3.15 | 11.49 | 5.17  | tr J3QMQ8 J3QMQ8_MOUSE         | Thioredoxin-disulfide reductase OS=Mus musculus OX=10090 GN=Txnrd2 PE=1 SV=1                                    | MOUSE | 3 |
| 3274 | 0.87 | 1.04 | 10.58 | 5.04  | sp Q8CHS8 VP37A_MOUSE          | Vacuolar protein sorting-associated protein 37A OS=Mus musculus OX=10090 GN=Vps37a PE=1 SV=1                    | MOUSE | 1 |
| 3275 | 0.87 | 0.99 | 12.42 | 2.78  | sp Q6GQS1 SCMC3_MOUSE          | Calcium-binding mitochondrial carrier protein SCaMC-3 OS=Mus musculus OX=10090 GN=Slc25a23 PE=1 SV=1            | MOUSE | 1 |
| 3276 | 0.87 | 0.98 | 5.31  | 1.82  | sp Q8CJ53 CIP4_MOUSE           | Cdc42-interacting protein 4 OS=Mus musculus OX=10090 GN=Trip10 PE=1 SV=2                                        | MOUSE | 1 |
| 3277 | 0.87 | 0.95 | 5.60  | 2.66  | tr Q9CZI7 Q9CZI7_MOUSE         | Annexin OS=Mus musculus OX=10090 GN=Anxa2 PE=2 SV=1                                                             | MOUSE | 1 |
| 3278 | 0.87 | 0.95 | 11.76 | 6.72  | sp Q9CQY2 RAMA_C_MOUSE         | RNA guanine-N7 methyltransferase activating subunit OS=Mus musculus OX=10090 GN=Ramac PE=3 SV=1                 | MOUSE | 1 |
| 3279 | 0.87 | 0.94 | 1.77  | 1.77  | tr A2AI62 A2AI62_MOUSE         | Hephaestin OS=Mus musculus OX=10090 GN=Heph PE=1 SV=1                                                           | MOUSE | 1 |
| 3280 | 0.86 | 1.44 | 41.94 | 35.48 | tr Q61782 Q61782_MOUSE         | Type I epidermal keratin mRNA, 3'end (Fragment) OS=Mus musculus OX=10090 PE=2 SV=1                              | MOUSE | 2 |
| 3281 | 0.86 | 1.08 | 18.97 | 5.17  | tr E0CYS1 E0CYS1_MOUSE         | Glutamate receptor-interacting protein 2 OS=Mus musculus OX=10090 GN=Grip2 PE=1 SV=1                            | MOUSE | 1 |
| 3282 | 0.86 | 0.97 | 6.72  | 1.37  | tr Q3TAC0 Q3TAC0_MOUSE         | BCAS3 domain-containing protein (Fragment) OS=Mus musculus OX=10090 GN=Bcas3 PE=2 SV=1                          | MOUSE | 1 |
| 3283 | 0.85 | 1.09 | 5.00  | 5.00  | tr F6ZE40 F6ZE40_MOUSE         | Ubiquinone biosynthesis monooxygenase COQ6, mitochondrial (Fragment) OS=Mus musculus OX=10090 GN=Coq6 PE=1 SV=1 | MOUSE | 1 |
| 3284 | 0.85 | 0.97 | 4.79  | 1.18  | tr A1L340 A1L340_MOUSE         | Retinitis pigmentosa 1 homolog (Human)-like 1 OS=Mus musculus OX=10090 GN=Rp1l1 PE=2 SV=1                       | MOUSE | 1 |
| 3285 | 0.85 | 0.94 | 11.47 | 1.89  | tr Q8K2V2 Q8K2V2_MOUSE         | Tmcc1 protein (Fragment) OS=Mus musculus OX=10090 GN=Tmcc1 PE=2 SV=1                                            | MOUSE | 1 |
| 3286 | 0.84 | 0.98 | 14.26 | 2.06  | tr F6TVP2 F6TVP2_MOUSE         | Deoxynucleoside triphosphate triphosphohydrolase SAMHD1 (Fragment) OS=Mus musculus OX=10090 GN=Samhd1 PE=1 SV=1 | MOUSE | 1 |
| 3287 | 0.84 | 0.98 | 11.35 | 1.89  | tr A0A1D5RLL3 A0A1D5RLL3_MOUSE | Protein EFR3 homolog A OS=Mus musculus OX=10090 GN=Efr3a PE=1 SV=1                                              | MOUSE | 1 |

|      |      |      |       |       |                                |                                                                                                                 |       |   |
|------|------|------|-------|-------|--------------------------------|-----------------------------------------------------------------------------------------------------------------|-------|---|
| 3288 | 0.84 | 0.97 | 4.41  | 1.14  | tr A0A140LHU9 A0A140LHU9_MOUSE | Patatin-like phospholipase domain-containing protein 6 OS=Mus musculus OX=10090 GN=Pnpla6 PE=1 SV=1             | MOUSE | 1 |
| 3289 | 0.84 | 0.96 | 15.86 | 3.23  | sp Q8K0C9 GMD_MOUSE            | GDP-mannose 4,6 dehydratase OS=Mus musculus OX=10090 GN=Gmds PE=1 SV=1                                          | MOUSE | 1 |
| 3290 | 0.84 | 0.94 | 1.54  | 0.45  | sp Q6ZQH8 NU188_MOUSE          | Nucleoporin NUP188 OS=Mus musculus OX=10090 GN=Nup188 PE=1 SV=2                                                 | MOUSE | 1 |
| 3291 | 0.84 | 0.93 | 6.49  | 2.64  | tr E9PYH3 E9PYH3_MOUSE         | Ethanolamine-phosphate phospho-lyase OS=Mus musculus OX=10090 GN=Etnppl PE=1 SV=1                               | MOUSE | 1 |
| 3292 | 0.84 | 0.92 | 8.28  | 2.61  | tr Q921V3 Q921V3_MOUSE         | Cysteine desulfurase, mitochondrial OS=Mus musculus OX=10090 GN=Nfs1 PE=2 SV=1                                  | MOUSE | 1 |
| 3293 | 0.83 | 0.96 | 9.50  | 1.61  | tr Q149D1 Q149D1_MOUSE         | Threonine synthase-like 1 (Bacterial) OS=Mus musculus OX=10090 GN=Thnsl1 PE=1 SV=1                              | MOUSE | 1 |
| 3294 | 0.83 | 0.93 | 8.22  | 2.35  | sp Q3TIV5 ZC3HF_MOUSE          | Zinc finger CCCH domain-containing protein 15 OS=Mus musculus OX=10090 GN=Zc3h15 PE=1 SV=2                      | MOUSE | 1 |
| 3295 | 0.83 | 0.91 | 11.22 | 2.20  | sp Q91V36 NRBP2_MOUSE          | Nuclear receptor-binding protein 2 OS=Mus musculus OX=10090 GN=Nrbp2 PE=1 SV=2                                  | MOUSE | 1 |
| 3296 | 0.82 | 2.99 | 8.01  | 2.71  | tr A2AS47 A2AS47_MOUSE         | Plakophilin-4 OS=Mus musculus OX=10090 GN=Pkp4 PE=1 SV=1                                                        | MOUSE | 2 |
| 3297 | 0.82 | 2.99 | 22.07 | 15.86 | sp Q9D6K5 SYJ2B_MOUSE          | Synaptojanin-2-binding protein OS=Mus musculus OX=10090 GN=Synj2bp PE=1 SV=1                                    | MOUSE | 2 |
| 3298 | 0.82 | 0.95 | 6.89  | 1.89  | sp Q6NVF0 OCRL_MOUSE           | Inositol polyphosphate 5-phosphatase OCRL OS=Mus musculus OX=10090 GN=Ocr1 PE=1 SV=1                            | MOUSE | 1 |
| 3299 | 0.82 | 0.92 | 20.27 | 2.66  | sp Q9D6T0 NOSIP_MOUSE          | Nitric oxide synthase-interacting protein OS=Mus musculus OX=10090 GN=Nosip PE=1 SV=1                           | MOUSE | 1 |
| 3300 | 0.82 | 0.9  | 10.00 | 10.00 | tr Q5SXR2 Q5SXR2_MOUSE         | Vacuole membrane protein 1 (Fragment) OS=Mus musculus OX=10090 GN=Vmp1 PE=1 SV=1                                | MOUSE | 1 |
| 3301 | 0.81 | 0.99 | 4.59  | 1.08  | RRRRRtr B2RXR1 B2RXR1_MOUSE    | REVERSED Coiled-coil domain containing 88B OS=Mus musculus OX=10090 GN=Ccdc88b PE=2 SV=1                        | MOUSE | 1 |
| 3302 | 0.81 | 0.94 | 17.34 | 10.33 | tr V9GX21 V9GX21_MOUSE         | ATP synthase mitochondrial F1 complex assembly factor 1 (Fragment) OS=Mus musculus OX=10090 GN=Atpaf1 PE=1 SV=1 | MOUSE | 3 |
| 3303 | 0.8  | 5    | 4.92  | 4.15  | tr Q3UIM5 Q3UIM5_MOUSE         | Carnitine O-palmitoyltransferase OS=Mus musculus OX=10090 GN=Cpt1b PE=2 SV=1                                    | MOUSE | 3 |

|      |      |      |       |       |                                 |                                                                                                    |       |   |
|------|------|------|-------|-------|---------------------------------|----------------------------------------------------------------------------------------------------|-------|---|
| 3304 | 0.8  | 0.93 | 15.22 | 10.87 | sp P70245 EBP_MO<br>USE         | 3-beta-hydroxysteroid-Delta(8),Delta(7)-isomerase OS=Mus<br>musculus OX=10090 GN=Ebp PE=1 SV=3     | MOUSE | 2 |
| 3305 | 0.8  | 0.88 | 3.06  | 3.06  | RRRRRsp Q9D5T7 <br>HORM1_MOUSE  | REVERSED HORMA domain-containing protein 1 OS=Mus<br>musculus OX=10090 GN=Hormad1 PE=1 SV=1        | MOUSE | 1 |
| 3306 | 0.79 | 9.96 | 26.15 | 23.73 | sp Q00897 A1AT4_<br>MOUSE       | Alpha-1-antitrypsin 1-4 OS=Mus musculus OX=10090<br>GN=Serpina1d PE=1 SV=1                         | MOUSE | 6 |
| 3307 | 0.79 | 0.98 | 2.68  | 0.67  | RRRRRtr Q921Y1 Q<br>921Y1_MOUSE | REVERSED RNA helicase OS=Mus musculus OX=10090<br>GN=Dhx16 PE=2 SV=1                               | MOUSE | 1 |
| 3308 | 0.79 | 0.91 | 3.56  | 0.97  | tr E9PUC4 E9PUC4_<br>MOUSE      | A-kinase anchor protein SPHKAP OS=Mus musculus<br>OX=10090 GN=Sphkap PE=1 SV=1                     | MOUSE | 1 |
| 3309 | 0.79 | 0.89 | 14.67 | 6.67  | tr Q8C6B5 Q8C6B5_<br>MOUSE      | Uncharacterized protein OS=Mus musculus OX=10090<br>GN=Yy1 PE=2 SV=1                               | MOUSE | 1 |
| 3310 | 0.78 | 0.91 | 2.72  | 0.35  | tr A1ILG8 A1ILG8_<br>MOUSE      | Chorein OS=Mus musculus OX=10090 GN=Vps13c PE=2<br>SV=1                                            | MOUSE | 1 |
| 3311 | 0.77 | 0.88 | 9.08  | 1.59  | tr Q3UVI9 Q3UVI9_<br>MOUSE      | Uncharacterized protein OS=Mus musculus OX=10090<br>GN=Abcf2 PE=2 SV=1                             | MOUSE | 1 |
| 3312 | 0.77 | 0.85 | 9.23  | 2.79  | sp Q5RJ54 ZSC26_M<br>OUSE       | Zinc finger and SCAN domain-containing protein 26<br>OS=Mus musculus OX=10090 GN=Zscan26 PE=2 SV=1 | MOUSE | 1 |
| 3313 | 0.77 | 0.85 | 1.42  | 1.33  | tr A2AMY5 A2AMY<br>5_MOUSE      | Ubiquitin-associated protein 2 OS=Mus musculus OX=10090<br>GN=Ubp2 PE=1 SV=1                       | MOUSE | 1 |
| 3314 | 0.77 | 0.85 | 1.62  | 1.62  | tr O88325 O88325_M<br>OUSE      | Alpha-N-acetylglucosaminidase OS=Mus musculus<br>OX=10090 GN=Naglu PE=1 SV=1                       | MOUSE | 1 |
| 3315 | 0.76 | 0.91 | 11.32 | 0.00  | tr B2RQV1 B2RQV1_<br>MOUSE      | Uncharacterized protein OS=Mus musculus OX=10090<br>GN=Naa25 PE=2 SV=1                             | MOUSE | 0 |
| 3316 | 0.76 | 0.88 | 7.82  | 2.61  | sp Q8CI33 C19L1_M<br>OUSE       | CWF19-like protein 1 OS=Mus musculus OX=10090<br>GN=Cwf19l1 PE=1 SV=2                              | MOUSE | 1 |
| 3317 | 0.76 | 0.88 | 9.31  | 6.85  | sp P97792 CXAR_M<br>OUSE        | Coxsackievirus and adenovirus receptor homolog OS=Mus<br>musculus OX=10090 GN=Cxadr PE=1 SV=1      | MOUSE | 2 |
| 3318 | 0.76 | 0.86 | 5.28  | 1.32  | tr G5E8A0 G5E8A0_<br>MOUSE      | Oxysterol-binding protein OS=Mus musculus OX=10090<br>GN=Osbp11 PE=1 SV=1                          | MOUSE | 1 |
| 3319 | 0.76 | 0.86 | 36.67 | 13.33 | tr G3UZ30 G3UZ30_<br>MOUSE      | E3 ubiquitin-protein ligase PPP1R11 (Fragment) OS=Mus<br>musculus OX=10090 GN=Ppp1r11 PE=1 SV=2    | MOUSE | 1 |
| 3320 | 0.76 | 0.86 | 7.47  | 3.90  | sp Q02614 S30BP_M<br>OUSE       | SAP30-binding protein OS=Mus musculus OX=10090<br>GN=Sap30bp PE=1 SV=2                             | MOUSE | 1 |

|      |      |      |       |       |                                     |                                                                                                   |       |   |
|------|------|------|-------|-------|-------------------------------------|---------------------------------------------------------------------------------------------------|-------|---|
| 3321 | 0.76 | 0.84 | 6.75  | 1.33  | tr D6QSS8 D6QSS8_MOUSE              | A disintegrin and metallopeptidase domain 22 isoform OS=Mus musculus OX=10090 GN=Adam22 PE=2 SV=1 | MOUSE | 1 |
| 3322 | 0.76 | 0.84 | 4.25  | 1.65  | tr Q69ZZ7 Q69ZZ7_MOUSE              | F-spondin (Fragment) OS=Mus musculus OX=10090 GN=mKIAA0762 PE=4 SV=1                              | MOUSE | 1 |
| 3323 | 0.76 | 0.84 | 1.36  | 1.36  | tr Q7TMQ0 Q7TMQ0_MOUSE              | Sodium/nucleoside cotransporter OS=Mus musculus OX=10090 GN=Slc28a2 PE=2 SV=1                     | MOUSE | 1 |
| 3324 | 0.76 | 0.84 | 3.79  | 3.79  | RRRRRtr A0A1D5RLR3 A0A1D5RLR3_MOUSE | REVERSED RNA-binding protein 34 OS=Mus musculus OX=10090 GN=Rbm34 PE=1 SV=1                       | MOUSE | 1 |
| 3325 | 0.76 | 0.83 | 3.91  | 3.91  | tr Q9ES94 Q9ES94_MOUSE              | Cathepsin X OS=Mus musculus OX=10090 GN=Ctsz PE=2 SV=1                                            | MOUSE | 1 |
| 3326 | 0.75 | 2.6  | 17.51 | 6.09  | sp Q6PAK3 ANM8_MOUSE                | Protein arginine N-methyltransferase 8 OS=Mus musculus OX=10090 GN=Prmt8 PE=1 SV=2                | MOUSE | 2 |
| 3327 | 0.75 | 0.83 | 5.56  | 1.68  | tr A0A0J9YVF0 A0A0J9YVF0_MOUSE      | Metabotropic glutamate receptor 2 OS=Mus musculus OX=10090 GN=Grm2 PE=1 SV=1                      | MOUSE | 1 |
| 3328 | 0.75 | 0.83 | 4.44  | 1.03  | tr B7XG49 B7XG49_MOUSE              | Family with sequence similarity 71, member A OS=Mus musculus OX=10090 GN=Fam71a PE=1 SV=1         | MOUSE | 1 |
| 3329 | 0.75 | 0.82 | 4.32  | 2.78  | sp Q9EPR4 S23A2_MOUSE               | Solute carrier family 23 member 2 OS=Mus musculus OX=10090 GN=Slc23a2 PE=1 SV=2                   | MOUSE | 1 |
| 3330 | 0.74 | 2.56 | 9.94  | 3.63  | sp Q8K0D0 CDK17_MOUSE               | Cyclin-dependent kinase 17 OS=Mus musculus OX=10090 GN=Cdk17 PE=1 SV=2                            | MOUSE | 2 |
| 3331 | 0.74 | 0.84 | 9.02  | 2.65  | tr Q541Z2 Q541Z2_MOUSE              | Uncharacterized protein OS=Mus musculus OX=10090 GN=Fnta PE=1 SV=1                                | MOUSE | 1 |
| 3332 | 0.74 | 0.82 | 2.39  | 0.95  | tr Q5DTJ4 Q5DTJ4_MOUSE              | MKIAA4178 protein (Fragment) OS=Mus musculus OX=10090 GN=Prrc2a PE=2 SV=1                         | MOUSE | 1 |
| 3333 | 0.74 | 0.82 | 34.78 | 34.78 | tr D3YWR8 D3YWR8_MOUSE              | RIKEN cDNA 1110059G10 gene OS=Mus musculus OX=10090 GN=1110059G10Rik PE=1 SV=1                    | MOUSE | 1 |
| 3334 | 0.73 | 0.99 | 11.40 | 2.39  | sp Q8BFR4 GNS_MOUSE                 | N-acetylglucosamine-6-sulfatase OS=Mus musculus OX=10090 GN=Gns PE=1 SV=1                         | MOUSE | 1 |
| 3335 | 0.73 | 0.93 | 4.33  | 0.59  | tr B9EKJ3 B9EKJ3_MOUSE              | Protein MON2 homolog OS=Mus musculus OX=10090 GN=Mon2 PE=1 SV=1                                   | MOUSE | 1 |
| 3336 | 0.73 | 0.83 | 8.46  | 1.38  | tr Q9QZA3 Q9QZA3_MOUSE              | Synapsin IIIa OS=Mus musculus OX=10090 GN=Syn3 PE=2 SV=1                                          | MOUSE | 1 |

|      |      |        |       |       |                                |                                                                                                   |       |    |
|------|------|--------|-------|-------|--------------------------------|---------------------------------------------------------------------------------------------------|-------|----|
| 3337 | 0.73 | 0.83   | 7.58  | 2.40  | sp Q6NS82 RETR2_MOUSE          | Reticulophagy regulator 2 OS=Mus musculus OX=10090<br>GN=Retreg2 PE=1 SV=2                        | MOUSE | 1  |
| 3338 | 0.72 | 102.62 | 28.62 | 18.54 | sp Q8C8R3-4 ANK2_MOUSE         | Isoform 4 of Ankyrin-2 OS=Mus musculus OX=10090<br>GN=Ank2                                        | MOUSE | 48 |
| 3339 | 0.72 | 1.01   | 4.22  | 0.53  | tr F8VQD1 F8VQD1_MOUSE         | Protein polybromo-1 OS=Mus musculus OX=10090<br>GN=Pbrm1 PE=1 SV=1                                | MOUSE | 1  |
| 3340 | 0.72 | 0.83   | 16.97 | 5.96  | sp Q9JKX6 NUDT5_MOUSE          | ADP-sugar pyrophosphatase OS=Mus musculus OX=10090<br>GN=Nudt5 PE=1 SV=1                          | MOUSE | 1  |
| 3341 | 0.72 | 0.82   | 6.84  | 1.40  | tr A0A0R4J102 A0A0R4J102_MOUSE | Cytoplasmic polyadenylation element-binding protein 3 OS=Mus musculus OX=10090 GN=Cpeb3 PE=1 SV=1 | MOUSE | 1  |
| 3342 | 0.72 | 0.8    | 4.13  | 1.65  | sp D3YXJ0 DGKH_MOUSE           | Diacylglycerol kinase eta OS=Mus musculus OX=10090<br>GN=Dgkh PE=1 SV=2                           | MOUSE | 1  |
| 3343 | 0.72 | 0.79   | 1.17  | 1.17  | RRRRRsp Q6PFH3 DCA15_MOUSE     | REVERSED DDB1- and CUL4-associated factor 15 OS=Mus musculus OX=10090 GN=Dcaf15 PE=2 SV=1         | MOUSE | 1  |
| 3344 | 0.71 | 0.8    | 44.58 | 16.87 | tr A0A0N4SW28 A0A0N4SW28_MOUSE | Guanine nucleotide-binding protein subunit gamma OS=Mus musculus OX=10090 GN=Gng12 PE=1 SV=1      | MOUSE | 1  |
| 3345 | 0.71 | 0.79   | 6.71  | 1.07  | sp Q8VD75 HIP1_MOUSE           | Huntingtin-interacting protein 1 OS=Mus musculus OX=10090 GN=Hip1 PE=1 SV=2                       | MOUSE | 1  |
| 3346 | 0.71 | 0.79   | 3.08  | 1.85  | tr Q8BIY0 Q8BIY0_MOUSE         | Uncharacterized protein OS=Mus musculus OX=10090<br>GN=Rnasel PE=2 SV=1                           | MOUSE | 1  |
| 3347 | 0.71 | 0.79   | 7.46  | 3.73  | tr A0A0X1KG67 A0A0X1KG67_MOUSE | ER membrane protein complex subunit 10 OS=Mus musculus OX=10090 GN=Emc10 PE=1 SV=1                | MOUSE | 1  |
| 3348 | 0.7  | 0.8    | 2.19  | 0.51  | tr E9Q6A7 E9Q6A7_MOUSE         | Bromodomain PHD finger transcription factor OS=Mus musculus OX=10090 GN=Bptf PE=1 SV=1            | MOUSE | 1  |
| 3349 | 0.7  | 0.8    | 16.73 | 8.37  | sp Q2TPA8 HSDL2_MOUSE          | Hydroxysteroid dehydrogenase-like protein 2 OS=Mus musculus OX=10090 GN=Hsd12 PE=1 SV=1           | MOUSE | 1  |
| 3350 | 0.69 | 0.8    | 18.97 | 0.00  | sp Q8K0D7 GET1_MOUSE           | Guided entry of tail-anchored proteins factor 1 OS=Mus musculus OX=10090 GN=Get1 PE=1 SV=1        | MOUSE | 0  |
| 3351 | 0.69 | 0.79   | 7.72  | 2.36  | tr A0A0R4J0B5 A0A0R4J0B5_MOUSE | RUS family member 1 OS=Mus musculus OX=10090<br>GN=Rusf1 PE=1 SV=1                                | MOUSE | 1  |
| 3352 | 0.69 | 0.77   | 3.31  | 0.71  | tr K3W4M8 K3W4M8_MOUSE         | Adhesion G protein-coupled receptor L3 OS=Mus musculus OX=10090 GN=Adgrl3 PE=1 SV=1               | MOUSE | 1  |
| 3353 | 0.69 | 0.77   | 25.89 | 8.93  | tr Q925A2 Q925A2_MOUSE         | Fibroblast growth factor OS=Mus musculus OX=10090<br>GN=Fgf2 PE=1 SV=1                            | MOUSE | 1  |

|      |      |      |       |       |                                     |                                                                                                                    |       |   |
|------|------|------|-------|-------|-------------------------------------|--------------------------------------------------------------------------------------------------------------------|-------|---|
| 3354 | 0.69 | 0.76 | 7.77  | 2.95  | tr Q80U76 Q80U76_MOUSE              | Ribosome biogenesis regulatory protein (Fragment) OS=Mus musculus OX=10090 GN=Rrs1 PE=2 SV=2                       | MOUSE | 1 |
| 3355 | 0.69 | 0.76 | 4.87  | 2.02  | tr Q9EPU8 Q9EPU8_MOUSE              | Sodium-calcium exchanger 3 (Fragment) OS=Mus musculus OX=10090 GN=Slc8a3 PE=2 SV=2                                 | MOUSE | 1 |
| 3356 | 0.69 | 0.76 | 7.88  | 2.96  | tr Q8C1Y9 Q8C1Y9_MOUSE              | Uncharacterized protein OS=Mus musculus OX=10090 GN=Arl6ip1 PE=2 SV=1                                              | MOUSE | 1 |
| 3357 | 0.69 | 0.76 | 1.25  | 1.25  | tr V9GX81 V9GX81_MOUSE              | Maestro heat-like repeat family member 6 OS=Mus musculus OX=10090 GN=Mroh6 PE=1 SV=1                               | MOUSE | 1 |
| 3358 | 0.69 | 0.76 | 3.16  | 3.16  | tr Q3UEW2 Q3UEW2_MOUSE              | HP domain-containing protein OS=Mus musculus OX=10090 GN=Dmtn PE=2 SV=1                                            | MOUSE | 1 |
| 3359 | 0.69 | 0.76 | 10.87 | 10.87 | sp Q9D1Q4 DPM3_MOUSE                | Dolichol-phosphate mannosyltransferase subunit 3 OS=Mus musculus OX=10090 GN=Dpm3 PE=1 SV=1                        | MOUSE | 1 |
| 3360 | 0.68 | 0.79 | 13.19 | 3.83  | tr Q3UXF7 Q3UXF7_MOUSE              | Uncharacterized protein (Fragment) OS=Mus musculus OX=10090 GN=Scfd2 PE=2 SV=1                                     | MOUSE | 1 |
| 3361 | 0.68 | 0.76 | 3.20  | 0.85  | tr Q6KAM6 Q6KAM6_MOUSE              | MFLJ00369 protein (Fragment) OS=Mus musculus OX=10090 GN=Arhgef1 PE=2 SV=1                                         | MOUSE | 1 |
| 3362 | 0.68 | 0.75 | 16.08 | 10.49 | sp Q8C6B9 AROS_MOUSE                | Active regulator of SIRT1 OS=Mus musculus OX=10090 GN=Rps19bp1 PE=1 SV=1                                           | MOUSE | 1 |
| 3363 | 0.67 | 0.74 | 3.81  | 3.81  | tr Q0VGS1 Q0VGS1_MOUSE              | Vasohibin 1 OS=Mus musculus OX=10090 GN=Vash1 PE=2 SV=1                                                            | MOUSE | 1 |
| 3364 | 0.67 | 0.74 | 2.94  | 2.94  | RRRRRtr A0A0J9YV03 A0A0J9YV03_MOUSE | REVERSED Protein FAM187B OS=Mus musculus OX=10090 GN=Fam187b PE=3 SV=1                                             | MOUSE | 1 |
| 3365 | 0.66 | 0.91 | 7.23  | 3.03  | sp Q5SUA5 MYO1G_MOUSE               | Unconventional myosin-Ig OS=Mus musculus OX=10090 GN=Myo1g PE=1 SV=1                                               | MOUSE | 2 |
| 3366 | 0.66 | 0.74 | 15.90 | 5.64  | sp Q6P3D0 NUD16_MOUSE               | U8 snoRNA-decapping enzyme OS=Mus musculus OX=10090 GN=Nudt16 PE=1 SV=1                                            | MOUSE | 1 |
| 3367 | 0.66 | 0.73 | 3.76  | 0.98  | sp Q9EPQ2 RPGR1_MOUSE               | X-linked retinitis pigmentosa GTPase regulator-interacting protein 1 OS=Mus musculus OX=10090 GN=Rpgrip1 PE=1 SV=1 | MOUSE | 1 |
| 3368 | 0.66 | 0.73 | 2.60  | 2.60  | tr Q9DCV1 Q9DCV1_MOUSE              | Cathepsin C OS=Mus musculus OX=10090 GN=Ctsc PE=2 SV=1                                                             | MOUSE | 1 |



|      |      |       |       |       |                                |                                                                                                                    |       |    |
|------|------|-------|-------|-------|--------------------------------|--------------------------------------------------------------------------------------------------------------------|-------|----|
| 3369 | 0.65 | 0.75  | 7.41  | 2.53  | tr B9EKS7 B9EKS7_MOUSE         | CDP-diacylglycerol--glycerol-3-phosphate 3-phosphatidyltransferase OS=Mus musculus OX=10090 GN=Pgs1 PE=1 SV=1      | MOUSE | 1  |
| 3370 | 0.65 | 0.75  | 11.67 | 4.10  | sp Q91Z49 UIF_MOUSE            | UAP56-interacting factor OS=Mus musculus OX=10090 GN=Fytd1 PE=1 SV=1                                               | MOUSE | 1  |
| 3371 | 0.65 | 0.72  | 3.97  | 1.67  | tr B2RPY3 B2RPY3_MOUSE         | F-box and leucine-rich repeat protein 16 OS=Mus musculus OX=10090 GN=Fbxl16 PE=1 SV=1                              | MOUSE | 1  |
| 3372 | 0.65 | 0.72  | 4.38  | 4.38  | tr Q3UGB8 Q3UGB8_MOUSE         | Derlin OS=Mus musculus OX=10090 GN=Derl1 PE=2 SV=1                                                                 | MOUSE | 1  |
| 3373 | 0.65 | 0.72  | 4.60  | 4.60  | tr A0A3Q4L2U5 A0A3Q4L2U5_MOUSE | Solute carrier family 25 member 46 OS=Mus musculus OX=10090 GN=Slc25a46 PE=1 SV=1                                  | MOUSE | 1  |
| 3374 | 0.64 | 19.49 | 12.00 | 6.68  | tr A0A0R4J170 A0A0R4J170_MOUSE | Transcription activator BRG1 OS=Mus musculus OX=10090 GN=Smarca4 PE=1 SV=1                                         | MOUSE | 11 |
| 3375 | 0.64 | 0.74  | 10.11 | 5.32  | sp Q9CPR1 RWDD4_MOUSE          | RWD domain-containing protein 4 OS=Mus musculus OX=10090 GN=Rwdd4 PE=2 SV=1                                        | MOUSE | 1  |
| 3376 | 0.64 | 0.72  | 4.95  | 1.85  | tr Q8K131 Q8K131_MOUSE         | Beta-galactosidase OS=Mus musculus OX=10090 GN=Glb1 PE=2 SV=1                                                      | MOUSE | 1  |
| 3377 | 0.63 | 0.82  | 3.64  | 1.25  | tr Q3UHC9 Q3UHC9_MOUSE         | Potassium voltage-gated channel subfamily H member 1 OS=Mus musculus OX=10090 GN=Kcnh1 PE=1 SV=1                   | MOUSE | 2  |
| 3378 | 0.63 | 0.71  | 20.90 | 12.69 | tr F8WJ13 F8WJ13_MOUSE         | Coiled-coil domain-containing protein 58 OS=Mus musculus OX=10090 GN=Ccdc58 PE=1 SV=1                              | MOUSE | 1  |
| 3379 | 0.63 | 0.71  | 6.03  | 3.45  | RRRRRtr Q6RJ37 Q6RJ37_MOUSE    | REVERSED MHC class I heavy chain maturation peptide H-2K(D) (Fragment) OS=Mus musculus OX=10090 GN=H2-K1 PE=2 SV=1 | MOUSE | 1  |
| 3380 | 0.63 | 0.69  | 1.15  | 0.46  | RRRRRtr B7ZN28 B7ZN28_MOUSE    | REVERSED Papilin OS=Mus musculus OX=10090 GN=Papln PE=1 SV=1                                                       | MOUSE | 1  |
| 3381 | 0.63 | 0.69  | 5.62  | 5.62  | tr Q9CSA3 Q9CSA3_MOUSE         | RING-type E3 ubiquitin transferase (Fragment) OS=Mus musculus OX=10090 GN=Rnf138 PE=2 SV=1                         | MOUSE | 1  |
| 3382 | 0.63 | 0.69  | 2.07  | 2.07  | tr Q3TYJ1 Q3TYJ1_MOUSE         | Solute carrier family 18 (Vesicular monoamine), member 3 OS=Mus musculus OX=10090 GN=Slc18a3 PE=1 SV=1             | MOUSE | 1  |
| 3383 | 0.63 | 0.68  | 1.54  | 0.70  | RRRRRsp P70298 CUX2_MOUSE      | REVERSED Homeobox protein cut-like 2 OS=Mus musculus OX=10090 GN=Cux2 PE=2 SV=2                                    | MOUSE | 1  |
| 3384 | 0.63 | 0.68  | 1.54  | 0.87  | tr Q8CFX3 Q8CFX3_MOUSE         | Protocadherin 1 OS=Mus musculus OX=10090 GN=Pcdh1 PE=1 SV=1                                                        | MOUSE | 1  |

|      |      |      |       |       |                                |                                                                                                          |       |   |
|------|------|------|-------|-------|--------------------------------|----------------------------------------------------------------------------------------------------------|-------|---|
| 3385 | 0.62 | 0.69 | 1.67  | 0.68  | tr A0A5H1ZRL7 A0A5H1ZRL7_MOUSE | Transformation-related protein 53-binding protein 1 OS=Mus musculus OX=10090 GN=Trp53bp1 PE=1 SV=1       | MOUSE | 1 |
| 3386 | 0.62 | 0.68 | 8.08  | 3.85  | tr E9QN77 E9QN77_MOUSE         | Transmembrane and ubiquitin-like domain-containing protein 1 OS=Mus musculus OX=10090 GN=Tmub1 PE=1 SV=1 | MOUSE | 1 |
| 3387 | 0.62 | 0.67 | 18.10 | 18.10 | tr Q45TP8 Q45TP8_MOUSE         | CKLF-like MARVEL transmembrane domain-containing protein 5 OS=Mus musculus OX=10090 GN=Cmtm5 PE=1 SV=1   | MOUSE | 1 |
| 3388 | 0.61 | 0.68 | 4.68  | 2.27  | tr Q91WW6 Q91WW6_MOUSE         | TATA-binding protein associated factor TAFIII35 (Fragment) OS=Mus musculus OX=10090 GN=Taf4 PE=2 SV=1    | MOUSE | 1 |
| 3389 | 0.61 | 0.67 | 6.31  | 3.40  | tr Q8R0L6 Q8R0L6_MOUSE         | Coro2a protein (Fragment) OS=Mus musculus OX=10090 GN=Coro2a PE=2 SV=1                                   | MOUSE | 1 |
| 3390 | 0.61 | 0.67 | 3.69  | 1.73  | tr F8WJ51 F8WJ51_MOUSE         | Netrin-G1 OS=Mus musculus OX=10090 GN=Ntng1 PE=1 SV=2                                                    | MOUSE | 1 |
| 3391 | 0.61 | 0.67 | 9.66  | 9.66  | tr F6TGV1 F6TGV1_MOUSE         | Ribosomal RNA-processing protein 40 (Fragment) OS=Mus musculus OX=10090 GN=Exosc3 PE=1 SV=1              | MOUSE | 1 |
| 3392 | 0.61 | 0.66 | 4.13  | 4.13  | tr Q3UII2 Q3UII2_MOUSE         | Tetraspanin OS=Mus musculus OX=10090 GN=Cd82 PE=1 SV=1                                                   | MOUSE | 1 |
| 3393 | 0.6  | 0.68 | 2.75  | 0.99  | tr F8VQ93 F8VQ93_MOUSE         | PH-interacting protein OS=Mus musculus OX=10090 GN=Phip PE=1 SV=1                                        | MOUSE | 1 |
| 3394 | 0.6  | 0.67 | 22.22 | 6.51  | sp Q99KI3 EMC3_MOUSE           | ER membrane protein complex subunit 3 OS=Mus musculus OX=10090 GN=Emc3 PE=1 SV=3                         | MOUSE | 1 |
| 3395 | 0.6  | 0.67 | 4.11  | 1.34  | RRRRRtr Q6A011 Q6A011_MOUSE    | REVERSED MKIAA0706 protein (Fragment) OS=Mus musculus OX=10090 GN=Kif1c PE=2 SV=1                        | MOUSE | 1 |
| 3396 | 0.6  | 0.66 | 2.65  | 0.69  | RRRRRtr F7C528 F7C528_MOUSE    | REVERSED DNA helicase (Fragment) OS=Mus musculus OX=10090 GN=Chd3 PE=1 SV=1                              | MOUSE | 1 |
| 3397 | 0.6  | 0.65 | 14.97 | 5.88  | sp Q8CIT0 CRF_MOUSE            | Corticoliberin OS=Mus musculus OX=10090 GN=Crh PE=2 SV=1                                                 | MOUSE | 1 |
