# Supplementary material for: Retinal Proteomic Analysis in a Mouse Model of Endotoxin-Induced Uveitis Using Data-Independent Acquisition-Based Mass Spectrometry
Source: MDPI journal article supplement (doi:10.3390/ijms23126464), 2022-06-09
Supplement: s1 [file s1]

**Table S4.** Canonical pathways identified by IPA bioinformatic software with  $p$ -value less than 0.05 ( $p$ -value was calculated with the Fischer's exact test. Z-score represents activation or inhibition of the corresponding pathways. NaN represents z-score unpredicted.)

| No. | Ingenuity Canonical Pathways                                      | $p$ -value | Ratio  | z-score | Molecules                                                                                        |
|-----|-------------------------------------------------------------------|------------|--------|---------|--------------------------------------------------------------------------------------------------|
| 1   | Synaptogenesis Signaling Pathway                                  | 0.000      | 0.0442 | 0.277   | Ap2s1, Calm3, Cplx4, Mapk3, Nlgn2, Prkaca, Ralb, Rap1a, Rras2, Sgta, Snap25, Sncb, Stxbp1, Vamp2 |
| 2   | Acute Phase Response Signaling                                    | 0.000      | 0.0595 | 2.111   | Fga, Fgg, Ftl, Hp, Hpx, Mapk3, Ralb, Rap1a, Rras2, Serpina3, Ttr                                 |
| 3   | SNARE Signaling Pathway                                           | 0.000      | 0.0662 | -1      | Calm3, Cplx4, Myl6, Prkaca, Sgta, Snap25, Sncb, Stxbp1, Vamp2                                    |
| 4   | Opioid Signaling Pathway                                          | 0.000      | 0.0429 | 0.905   | Ap2s1, Calm3, Clta, Cltb, Gnai1, Gnat1, Mapk3, Prkaca, Ralb, Rap1a, Rgs6, Rras2                  |
| 5   | Iron homeostasis signaling pathway                                | 0.000      | 0.0647 | NaN     | Atp6ap1, Atp6v0d1, Atp6v1f, Atp6v1g1, Ftl, Hp, Hpx, Mapk3, Skp1                                  |
| 6   | $\alpha$ -Adrenergic Signaling                                    | 0.000      | 0.0741 | 0       | Calm3, Gnai1, Gnat1, Mapk3, Prkaca, Ralb, Rap1a, Rras2                                           |
| 7   | Role of MAPK Signaling in Promoting the Pathogenesis of Influenza | 0.000      | 0.0708 | 0       | Atp6ap1, Atp6v0d1, Atp6v1f, Atp6v1g1, Mapk3, Ralb, Rap1a, Rras2                                  |
| 8   | Phagosome Maturation                                              | 0.000      | 0.0566 | NaN     | Atp6ap1, Atp6v0d1, Atp6v1f, Atp6v1g1, Ctsa, Dynlrb1, Lamp2, Snap25, Vamp2                        |
| 9   | EIF2 Signaling                                                    | 0.000      | 0.0446 | 1.134   | Eif3k, Mapk3, Ralb, Rap1a, Rpl15, Rpl38, Rplp2, Rps24, Rps29, Rras2                              |
| 10  | Virus Entry via Endocytic Pathways                                | 0.000      | 0.0673 | NaN     | Ap2s1, Clta, Cltb, Dnm1, Ralb, Rap1a, Rras2                                                      |
| 11  | Oncostatin M Signaling                                            | 0.000      | 0.116  | 1.342   | Mapk3, Ralb, Rap1a, Rras2, Stat1                                                                 |

|    |                                                |       |        |        |                                                                                           |
|----|------------------------------------------------|-------|--------|--------|-------------------------------------------------------------------------------------------|
| 12 | Chemokine Signaling                            | 0.000 | 0.075  | 0      | Calm3, Gnai1, Mapk3, Ralb, Rap1a, Rras2                                                   |
| 13 | CLEAR Signaling Pathway                        | 0.000 | 0.0351 | 0.632  | Atp6ap1, Atp6v0d1, Atp6v1f, Atp6v1g1, Ctsa, Mapk3, Ralb, Rap1a, Rras2, Ywhae              |
| 14 | G Beta Gamma Signaling                         | 0.000 | 0.0543 | 0.378  | Gnai1, Gnat1, Mapk3, Prkaca, Ralb, Rap1a, Rras2                                           |
| 15 | fMLP Signaling in Neutrophils                  | 0.000 | 0.0534 | 0      | Calm3, Gnai1, Gnat1, Mapk3, Ralb, Rap1a, Rras2                                            |
| 16 | CCR3 Signaling in Eosinophils                  | 0.000 | 0.0519 | 1      | Calm3, Gnai1, Gnat1, Mapk3, Ralb, Rap1a, Rras2                                            |
| 17 | CNTF Signaling                                 | 0.000 | 0.0877 | 1.342  | Mapk3, Ralb, Rap1a, Rras2, Stat1                                                          |
| 18 | Gαi Signaling                                  | 0.000 | 0.05   | 0.816  | Gnai1, Gnat1, Mapk3, Prkaca, Ralb, Rap1a, Rras2                                           |
| 19 | Apelin Endothelial Signaling Pathway           | 0.000 | 0.0496 | 0      | Calm3, Gnai1, Gnat1, Mapk3, Ralb, Rap1a, Rras2                                            |
| 20 | Cardiac Hypertrophy Signaling                  | 0.000 | 0.0346 | 0.707  | Calm3, Gnai1, Gnat1, Mapk3, Myl6, Prkaca, Ralb, Rap1a, Rras2                              |
| 21 | Thrombopoietin Signaling                       | 0.000 | 0.0794 | 1.342  | Mapk3, Ralb, Rap1a, Rras2, Stat1                                                          |
| 22 | IGF-1 Signaling                                | 0.000 | 0.0577 | 1.342  | Mapk3, Prkaca, Ralb, Rap1a, Rras2, Ywhae                                                  |
| 23 | Colorectal Cancer Metastasis Signaling         | 0.000 | 0.0332 | 1.633  | Gnai1, Gnat1, Mapk3, Msh6, Prkaca, Ralb, Rap1a, Rras2, Stat1                              |
| 24 | Estrogen Receptor Signaling                    | 0.000 | 0.027  | -0.333 | Atp5f1d, Gnai1, Gnat1, Mapk3, Myl6, Ndufb5, Ndufs8, Prkaca, Ralb, Rap1a, Rras2            |
| 25 | Role of JAK1 and JAK3 in γc Cytokine Signaling | 0.000 | 0.0725 | NaN    | Mapk3, Ralb, Rap1a, Rras2, Stat1                                                          |
| 26 | GM-CSF Signaling                               | 0.000 | 0.0714 | 1.342  | Mapk3, Ralb, Rap1a, Rras2, Stat1                                                          |
| 27 | Role of Tissue Factor in Cancer                | 0.000 | 0.0517 | NaN    | Fga, Fgg, Mapk3, Ralb, Rap1a, Rras2                                                       |
| 28 | Glucocorticoid Receptor Signaling              | 0.000 | 0.0224 | NaN    | Actl6b, Atp5f1d, Fgg, Fkbp5, Hp, Mapk3, Ndufb5, Ndufs8, Prkaca, Ralb, Rap1a, Rras2, Stat1 |

|    |                                                  |       |        |       |                                                 |
|----|--------------------------------------------------|-------|--------|-------|-------------------------------------------------|
| 29 | CXCR4 Signaling                                  | 0.000 | 0.0414 | 0     | Gnai1, Gnat1, Mapk3, Myl6, Ralb, Rap1a, Rras2   |
| 30 | Renin-Angiotensin Signaling                      | 0.000 | 0.0492 | 1.342 | Mapk3, Prkaca, Ralb, Rap1a, Rras2, Stat1        |
| 31 | IL-3 Signaling                                   | 0.000 | 0.0633 | 1.342 | Mapk3, Ralb, Rap1a, Rras2, Stat1                |
| 32 | Renal Cell Carcinoma Signaling                   | 0.000 | 0.0625 | 1     | Eloc, Mapk3, Ralb, Rap1a, Rras2                 |
| 33 | Regulation of eIF4 and p70S6K Signaling          | 0.000 | 0.0391 | 1     | Eif3k, Mapk3, Ralb, Rap1a, Rps24, Rps29, Rras2  |
| 34 | Endocannabinoid Developing Neuron Pathway        | 0.000 | 0.0472 | 0.447 | Gnai1, Mapk3, Prkaca, Ralb, Rap1a, Rras2        |
| 35 | FLT3 Signaling in Hematopoietic Progenitor Cells | 0.000 | 0.061  | 1.342 | Mapk3, Ralb, Rap1a, Rras2, Stat1                |
| 36 | JAK/STAT Signaling                               | 0.000 | 0.061  | 1.342 | Mapk3, Ralb, Rap1a, Rras2, Stat1                |
| 37 | Synaptic Long Term Potentiation                  | 0.000 | 0.0458 | 0.816 | Calm3, Mapk3, Prkaca, Ralb, Rap1a, Rras2        |
| 38 | p70S6K Signaling                                 | 0.000 | 0.0455 | 0.447 | Gnai1, Mapk3, Ralb, Rap1a, Rras2, Ywhae         |
| 39 | Ferroptosis Signaling Pathway                    | 0.000 | 0.0455 | 0     | Ftl, H2ax, Mapk3, Ralb, Rap1a, Rras2            |
| 40 | P2Y Purigenic Receptor Signaling Pathway         | 0.000 | 0.0451 | 1.633 | Gnai1, Mapk3, Prkaca, Ralb, Rap1a, Rras2        |
| 41 | Prolactin Signaling                              | 0.000 | 0.0581 | 1.342 | Mapk3, Ralb, Rap1a, Rras2, Stat1                |
| 42 | PDGF Signaling                                   | 0.000 | 0.0581 | 1.342 | Mapk3, Ralb, Rap1a, Rras2, Stat1                |
| 43 | BMP signaling pathway                            | 0.000 | 0.0575 | 1.342 | Mapk3, Prkaca, Ralb, Rap1a, Rras2               |
| 44 | GNRH Signaling                                   | 0.000 | 0.0365 | 0.816 | Calm3, Gnai1, Mapk3, Prkaca, Ralb, Rap1a, Rras2 |

|    |                                                      |       |        |       |                                                       |
|----|------------------------------------------------------|-------|--------|-------|-------------------------------------------------------|
| 45 | Regulation of Cellular Mechanics by Calpain Protease | 0.000 | 0.0562 | 1     | Ezr, Mapk3, Ralb, Rap1a, Rras2                        |
| 46 | Melanoma Signaling                                   | 0.000 | 0.08   | 1     | Mapk3, Ralb, Rap1a, Rras2                             |
| 47 | Insulin Receptor Signaling                           | 0.000 | 0.0429 | 0.816 | Mapk3, Prkaca, Ralb, Rap1a, Rras2, Vamp2              |
| 48 | UVC-Induced MAPK Signaling                           | 0.000 | 0.0784 | 1     | Mapk3, Ralb, Rap1a, Rras2                             |
| 49 | Hereditary Breast Cancer Signaling                   | 0.000 | 0.0423 | NaN   | Actl6b, H2ax, Msh6, Ralb, Rap1a, Rras2                |
| 50 | Xenobiotic Metabolism General Signaling Pathway      | 0.000 | 0.042  | 0.816 | Ftl, Mapk3, Mgst3, Ralb, Rap1a, Rras2                 |
| 51 | Sertoli Cell-Sertoli Cell Junction Signaling         | 0.000 | 0.034  | NaN   | Epn2, Mapk3, Prkaca, Ralb, Rap1a, Rras2, Ybx3         |
| 52 | Phototransduction Pathway                            | 0.000 | 0.0741 | NaN   | Gnat1, Gngt1, Guca1a, Prkaca                          |
| 53 | Melanocyte Development and Pigmentation Signaling    | 0.000 | 0.051  | 1.342 | Mapk3, Prkaca, Ralb, Rap1a, Rras2                     |
| 54 | UVA-Induced MAPK Signaling                           | 0.000 | 0.051  | 1.342 | Mapk3, Ralb, Rap1a, Rras2, Stat1                      |
| 55 | VEGF Signaling                                       | 0.000 | 0.0505 | 1     | Mapk3, Ralb, Rap1a, Rras2, Ywhae                      |
| 56 | mTOR Signaling                                       | 0.001 | 0.033  | 1     | Eif3k, Mapk3, Ralb, Rap1a, Rps24, Rps29, Rras2        |
| 57 | Oxytocin Signaling Pathway                           | 0.001 | 0.0285 | 0     | Calm3, Gnai1, Mapk3, Myl6, Prkaca, Ralb, Rap1a, Rras2 |
| 58 | Cancer Drug Resistance By Drug Efflux                | 0.001 | 0.069  | NaN   | Mapk3, Ralb, Rap1a, Rras2                             |
| 59 | Huntington's Disease Signaling                       | 0.001 | 0.0283 | NaN   | Atp5f1d, Clta, Cltb, Dnm1, Glis, Mapk3, Snap25, Vamp2 |
| 60 | Ovarian Cancer Signaling                             | 0.001 | 0.038  | 1.342 | Mapk3, Msh6, Prkaca, Ralb, Rap1a, Rras2               |

|    |                                              |       |        |       |                                                 |
|----|----------------------------------------------|-------|--------|-------|-------------------------------------------------|
| 61 | Endometrial Cancer Signaling                 | 0.001 | 0.0667 | 1     | Mapk3, Ralb, Rap1a, Rras2                       |
| 62 | Role of NFAT in Cardiac Hypertrophy          | 0.001 | 0.0315 | 1.134 | Calm3, Gnai1, Mapk3, Prkaca, Ralb, Rap1a, Rras2 |
| 63 | IL-2 Signaling                               | 0.001 | 0.0656 | 1     | Mapk3, Ralb, Rap1a, Rras2                       |
| 64 | Thrombin Signaling                           | 0.001 | 0.0311 | 0.447 | Gnai1, Gnat1, Mapk3, Myl6, Ralb, Rap1a, Rras2   |
| 65 | ERB2-ERBB3 Signaling                         | 0.001 | 0.0615 | 1     | Mapk3, Ralb, Rap1a, Rras2                       |
| 66 | CDK5 Signaling                               | 0.001 | 0.0439 | 0.447 | Mapk3, Prkaca, Ralb, Rap1a, Rras2               |
| 67 | NRF2-mediated Oxidative Stress Response      | 0.001 | 0.0295 | 0.447 | Fkbp5, Ftl, Mapk3, Mgst3, Ralb, Rap1a, Rras2    |
| 68 | ERBB4 Signaling                              | 0.001 | 0.0588 | 1     | Mapk3, Ralb, Rap1a, Rras2                       |
| 69 | Remodeling of Epithelial Adherens Junctions  | 0.001 | 0.0588 | NaN   | Clip1, Dnm1, Hgs, Nme1                          |
| 70 | PAK Signaling                                | 0.001 | 0.0424 | 0.447 | Mapk3, Myl6, Ralb, Rap1a, Rras2                 |
| 71 | SPINK1 General Cancer Pathway                | 0.001 | 0.058  | 1     | Mapk3, Ralb, Rap1a, Rras2                       |
| 72 | MSP-RON Signaling In Macrophages Pathway     | 0.001 | 0.042  | 0.447 | Mapk3, Ralb, Rap1a, Rras2, Stat1                |
| 73 | Tight Junction Signaling                     | 0.001 | 0.0337 | NaN   | Myl6, Prkaca, Safb, Snap25, Vamp2, Ybx3         |
| 74 | Agrin Interactions at Neuromuscular Junction | 0.001 | 0.0571 | 1     | Mapk3, Ralb, Rap1a, Rras2                       |
| 75 | Melatonin Signaling                          | 0.001 | 0.0556 | 0     | Calm3, Gnai1, Mapk3, Prkaca                     |
| 76 | Glioma Invasiveness Signaling                | 0.001 | 0.0548 | 1     | Mapk3, Ralb, Rap1a, Rras2                       |
| 77 | Glioma Signaling                             | 0.001 | 0.0403 | 0.447 | Calm3, Mapk3, Ralb, Rap1a, Rras2                |
| 78 | Gas Signaling                                | 0.001 | 0.04   | NaN   | Gnai1, Gnat1, Mapk3, Prkaca, Rap1a              |

|    |                                                   |       |        |       |                                                            |
|----|---------------------------------------------------|-------|--------|-------|------------------------------------------------------------|
| 79 | ERK5 Signaling                                    | 0.001 | 0.0541 | 0     | Ralb, Rap1a, Rras2, Ywhae                                  |
| 80 | 14-3-3-mediated Signaling                         | 0.002 | 0.0394 | 0.447 | Mapk3, Ralb, Rap1a, Rras2, Ywhae                           |
| 81 | GDNF Family Ligand-Receptor Interactions          | 0.002 | 0.0526 | 1     | Mapk3, Ralb, Rap1a, Rras2                                  |
| 82 | Antiproliferative Role of Somatostatin Receptor 2 | 0.002 | 0.0519 | 1     | Mapk3, Ralb, Rap1a, Rras2                                  |
| 83 | Endothelin-1 Signaling                            | 0.002 | 0.0312 | 0     | Gnai1, Gnat1, Mapk3, Ralb, Rap1a, Rras2                    |
| 84 | NF-κB Activation by Viruses                       | 0.002 | 0.0513 | 1     | Mapk3, Ralb, Rap1a, Rras2                                  |
| 85 | Neurotrophin/TRK Signaling                        | 0.002 | 0.0513 | 1     | Mapk3, Ralb, Rap1a, Rras2                                  |
| 86 | Thyroid Cancer Signaling                          | 0.002 | 0.0506 | 1     | Mapk3, Ralb, Rap1a, Rras2                                  |
| 87 | Synaptic Long Term Depression                     | 0.002 | 0.0308 | 0     | Gnai1, Gnat1, Mapk3, Ralb, Rap1a, Rras2                    |
| 88 | Gα12/13 Signaling                                 | 0.002 | 0.0376 | 0.447 | Mapk3, Myl6, Ralb, Rap1a, Rras2                            |
| 89 | GABA Receptor Signaling                           | 0.002 | 0.0376 | NaN   | Ap2s1, Dnm1, Gabrg2, Gnai1, Gnat1                          |
| 90 | Hepatic Fibrosis Signaling Pathway                | 0.002 | 0.0214 | -1    | Calm3, Ftl, Gnai1, Mapk3, Myl6, Prkaca, Ralb, Rap1a, Rras2 |
| 91 | Oxytocin In Brain Signaling Pathway               | 0.002 | 0.0305 | 0     | Calm3, Gnai1, Mapk3, Ralb, Rap1a, Rras2                    |
| 92 | Signaling by Rho Family GTPases                   | 0.002 | 0.0261 | 1     | Clip1, Ezr, Gnai1, Gnat1, Mapk3, Myl6, Septin6             |
| 93 | Gap Junction Signaling                            | 0.002 | 0.0303 | NaN   | Gnai1, Mapk3, Prkaca, Ralb, Rap1a, Rras2                   |
| 94 | Estrogen-Dependent Breast Cancer Signaling        | 0.002 | 0.0494 | 1     | Mapk3, Ralb, Rap1a, Rras2                                  |
| 95 | PI3K/AKT Signaling                                | 0.002 | 0.0302 | 0     | Cdc37, Mapk3, Ralb, Rap1a, Rras2, Ywhae                    |
| 96 | Adrenomedullin signaling pathway                  | 0.002 | 0.0302 | 0.816 | Calm3, Mapk3, Prkaca, Ralb, Rap1a, Rras2                   |

|     |                                                         |       |        |       |                                            |
|-----|---------------------------------------------------------|-------|--------|-------|--------------------------------------------|
| 97  | Role of MAPK Signaling in the Pathogenesis of Influenza | 0.002 | 0.0488 | NaN   | Mapk3, Ralb, Rap1a, Rras2                  |
| 98  | Ephrin Receptor Signaling                               | 0.002 | 0.0296 | 0     | Gnai1, Gnat1, Mapk3, Ralb, Rap1a, Rras2    |
| 99  | VEGF Family Ligand-Receptor Interactions                | 0.002 | 0.0476 | 1     | Mapk3, Ralb, Rap1a, Rras2                  |
| 100 | PEDF Signaling                                          | 0.002 | 0.0476 | 1     | Mapk3, Ralb, Rap1a, Rras2                  |
| 101 | MSP-RON Signaling In Cancer Cells Pathway               | 0.002 | 0.0357 | 0.447 | Mapk3, Ralb, Rap1a, Rras2, Ywhae           |
| 102 | LPS-stimulated MAPK Signaling                           | 0.002 | 0.0471 | 1     | Mapk3, Ralb, Rap1a, Rras2                  |
| 103 | PI3K Signaling in B Lymphocytes                         | 0.003 | 0.035  | 0.447 | Calm3, Mapk3, Ralb, Rap1a, Rras2           |
| 104 | IL-8 Signaling                                          | 0.003 | 0.0286 | 0.447 | Gnai1, Gnat1, Mapk3, Ralb, Rap1a, Rras2    |
| 105 | Ceramide Signaling                                      | 0.003 | 0.0444 | 1     | Mapk3, Ralb, Rap1a, Rras2                  |
| 106 | Autophagy                                               | 0.003 | 0.0279 | 0.447 | Calm3, Gorasp2, Lamp2, Mapk3, Prkaca, Ralb |
| 107 | Acute Myeloid Leukemia Signaling                        | 0.003 | 0.044  | 1     | Mapk3, Ralb, Rap1a, Rras2                  |
| 108 | Apelin Adipocyte Signaling Pathway                      | 0.003 | 0.044  | 0     | Gnai1, Mapk3, Mgst3, Prkaca                |
| 109 | ERK/MAPK Signaling                                      | 0.003 | 0.0278 | 1.633 | Mapk3, Prkaca, Ralb, Rap1a, Rras2, Stat1   |
| 110 | Corticotropin Releasing Hormone Signaling               | 0.003 | 0.0331 | 0     | Calm3, Gnai1, Mapk3, Prkaca, Rap1a         |
| 111 | Non-Small Cell Lung Cancer Signaling                    | 0.003 | 0.0426 | 1     | Mapk3, Ralb, Rap1a, Rras2                  |
| 112 | ERBB Signaling                                          | 0.003 | 0.0426 | 1     | Mapk3, Ralb, Rap1a, Rras2                  |
| 113 | Relaxin Signaling                                       | 0.004 | 0.0323 | NaN   | Gnai1, Gnat1, Mapk3, Prkaca, Rap1a         |

|     |                                            |       |        |       |                                                               |
|-----|--------------------------------------------|-------|--------|-------|---------------------------------------------------------------|
| 114 | TGF- $\beta$ Signaling                     | 0.004 | 0.0417 | 1     | Mapk3, Ralb, Rap1a, Rras2                                     |
| 115 | Extrinsic Prothrombin Activation Pathway   | 0.005 | 0.125  | NaN   | Fga, Fgg                                                      |
| 116 | Mouse Embryonic Stem Cell Pluripotency     | 0.005 | 0.0385 | 1     | Mapk3, Ralb, Rap1a, Rras2                                     |
| 117 | Apoptosis Signaling                        | 0.005 | 0.0385 | -1    | Mapk3, Ralb, Rap1a, Rras2                                     |
| 118 | Neuroinflammation Signaling Pathway        | 0.005 | 0.0221 | 0.447 | Calb1, Calb2, Gabrg2, Glis, Glul, Mapk3, Stat1                |
| 119 | Androgen Signaling                         | 0.005 | 0.0296 | NaN   | Calm3, Gnai1, Gnat1, Mapk3, Prkaca                            |
| 120 | Chronic Myeloid Leukemia Signaling         | 0.005 | 0.0374 | NaN   | Mapk3, Ralb, Rap1a, Rras2                                     |
| 121 | Telomerase Signaling                       | 0.005 | 0.0374 | 1     | Mapk3, Ralb, Rap1a, Rras2                                     |
| 122 | PPAR Signaling                             | 0.005 | 0.0374 | -1    | Mapk3, Ralb, Rap1a, Rras2                                     |
| 123 | Germ Cell-Sertoli Cell Junction Signaling  | 0.005 | 0.0292 | NaN   | Epn2, Mapk3, Ralb, Rap1a, Rras2                               |
| 124 | Actin Cytoskeleton Signaling               | 0.006 | 0.0245 | 0.816 | Ezr, Mapk3, Myl6, Ralb, Rap1a, Rras2                          |
| 125 | Axonal Guidance Signaling                  | 0.006 | 0.0177 | NaN   | Gnai1, Gnat1, Mapk3, Myl6, Plxnb2, Prkaca, Ralb, Rap1a, Rras2 |
| 126 | Glutamine Biosynthesis I                   | 0.007 | 1      | NaN   | Glul                                                          |
| 127 | Prostate Cancer Signaling                  | 0.007 | 0.0351 | NaN   | Mapk3, Ralb, Rap1a, Rras2                                     |
| 128 | Bladder Cancer Signaling                   | 0.007 | 0.0345 | 1     | Mapk3, Ralb, Rap1a, Rras2                                     |
| 129 | Neuregulin Signaling                       | 0.007 | 0.0342 | 1     | Mapk3, Ralb, Rap1a, Rras2                                     |
| 130 | Fc Epsilon RI Signaling                    | 0.008 | 0.0339 | 1     | Mapk3, Ralb, Rap1a, Rras2                                     |
| 131 | Cholecystokinin/Gastrin-mediated Signaling | 0.008 | 0.0336 | 1     | Mapk3, Ralb, Rap1a, Rras2                                     |



|     |                                                                               |       |        |        |                                            |
|-----|-------------------------------------------------------------------------------|-------|--------|--------|--------------------------------------------|
| 132 | Role of NANOG in Mammalian Embryonic Stem Cell Pluripotency                   | 0.008 | 0.0333 | 1      | Mapk3, Ralb, Rap1a, Rras2                  |
| 133 | NGF Signaling                                                                 | 0.008 | 0.0333 | 1      | Mapk3, Ralb, Rap1a, Rras2                  |
| 134 | Circadian Rhythm Signaling                                                    | 0.009 | 0.0224 | NaN    | Gnai1, Mapk3, Prkaca, Ralb, Rap1a, Rras2   |
| 135 | Regulation Of The Epithelial Mesenchymal Transition By Growth Factors Pathway | 0.009 | 0.026  | 1.342  | Mapk3, Mest, Ralb, Rap1a, Rras2            |
| 136 | Clathrin-mediated Endocytosis Signaling                                       | 0.009 | 0.0259 | NaN    | Ap2s1, Clta, Cltb, Dnm1, Hgs               |
| 137 | Insulin Secretion Signaling Pathway                                           | 0.009 | 0.0221 | 0.816  | Mapk3, Prkaca, Rap1a, Snap25, Stat1, Vamp2 |
| 138 | Glutamate Receptor Signaling                                                  | 0.009 | 0.0455 | NaN    | Calm3, Gls, Glul                           |
| 139 | PPAR $\alpha$ /RXR $\alpha$ Activation                                        | 0.009 | 0.0256 | -0.447 | Mapk3, Prkaca, Ralb, Rap1a, Rras2          |
| 140 | IL-6 Signaling                                                                | 0.010 | 0.0312 | 1      | Mapk3, Ralb, Rap1a, Rras2                  |
| 141 | ID1 Signaling Pathway                                                         | 0.010 | 0.025  | 1.342  | Mapk3, Plxnb2, Ralb, Rap1a, Rras2          |
| 142 | IL-22 Signaling                                                               | 0.011 | 0.0833 | NaN    | Mapk3, Stat1                               |
| 143 | Coronavirus Pathogenesis Pathway                                              | 0.011 | 0.0246 | -0.447 | Atp6ap1, Mapk3, Rps24, Rps29, Stat1        |
| 144 | HGF Signaling                                                                 | 0.011 | 0.0303 | 1      | Mapk3, Ralb, Rap1a, Rras2                  |
| 145 | Role of JAK family kinases in IL-6-type Cytokine Signaling                    | 0.011 | 0.08   | NaN    | Mapk3, Stat1                               |
| 146 | Ephrin B Signaling                                                            | 0.012 | 0.0417 | NaN    | Gnai1, Gnat1, Mapk3                        |
| 147 | HIF1 $\alpha$ Signaling                                                       | 0.012 | 0.024  | 1.342  | Eloc, Mapk3, Ralb, Rap1a, Rras2            |

|     |                                          |       |        |        |                                                 |
|-----|------------------------------------------|-------|--------|--------|-------------------------------------------------|
| 148 | STAT3 Pathway                            | 0.012 | 0.0296 | 1      | Mapk3, Ralb, Rap1a, Rras2                       |
| 149 | Xenobiotic Metabolism Signaling          | 0.012 | 0.0207 | NaN    | Ftl, Mapk3, Mgst3, Ralb, Rap1a, Rras2           |
| 150 | Sirtuin Signaling Pathway                | 0.013 | 0.0205 | -2     | Atp5f1d, Glc, Mapk3, Ndubf5, Ndufs8, Timm13     |
| 151 | RAC Signaling                            | 0.013 | 0.029  | 1      | Mapk3, Ralb, Rap1a, Rras2                       |
| 152 | Glutamine Degradation I                  | 0.013 | 0.5    | NaN    | Glc                                             |
| 153 | Macropinocytosis Signaling               | 0.014 | 0.0395 | NaN    | Ralb, Rap1a, Rras2                              |
| 154 | Angiopoietin Signaling                   | 0.014 | 0.039  | NaN    | Ralb, Rap1a, Rras2                              |
| 155 | Calcium Signaling                        | 0.014 | 0.0229 | 0      | Calm3, Mapk3, Myl6, Prkaca, Rap1a               |
| 156 | Role of BRCA1 in DNA Damage Response     | 0.016 | 0.0375 | NaN    | Actl6b, Msh6, Stat1                             |
| 157 | Dilated Cardiomyopathy Signaling Pathway | 0.017 | 0.027  | 1      | Dmd, Mapk3, Myl6, Prkaca                        |
| 158 | HER-2 Signaling in Breast Cancer         | 0.017 | 0.022  | 1      | Mapk3, Nup160, Ralb, Rap1a, Rras2               |
| 159 | PTEN Signaling                           | 0.017 | 0.0267 | -1     | Mapk3, Ralb, Rap1a, Rras2                       |
| 160 | FcγRIIB Signaling in B Lymphocytes       | 0.019 | 0.0353 | NaN    | Ralb, Rap1a, Rras2                              |
| 161 | Protein Kinase A Signaling               | 0.019 | 0.0171 | 0      | Calm3, Gnai1, Mapk3, Myl6, Prkaca, Rap1a, Ywhae |
| 162 | Hypusine Biosynthesis                    | 0.019 | 0.333  | NaN    | Eif5a                                           |
| 163 | cAMP-mediated signaling                  | 0.019 | 0.0213 | -0.447 | Calm3, Gnai1, Mapk3, Prkaca, Rap1a              |
| 164 | Epithelial Adherens Junction Signaling   | 0.020 | 0.0255 | -2     | Ralb, Rap1a, Rras2, Ywhae                       |

|     |                                                                                |       |        |       |                                                 |
|-----|--------------------------------------------------------------------------------|-------|--------|-------|-------------------------------------------------|
| 165 | Role of Macrophages, Fibroblasts and Endothelial Cells in Rheumatoid Arthritis | 0.021 | 0.0183 | NaN   | Calm3, Mapk3, Mif, Ralb, Rap1a, Rras2           |
| 166 | Coagulation System                                                             | 0.022 | 0.0571 | NaN   | Fga, Fgg                                        |
| 167 | MIF-mediated Glucocorticoid Regulation                                         | 0.023 | 0.0556 | NaN   | Mapk3, Mif                                      |
| 168 | Actin Nucleation by ARP-WASP Complex                                           | 0.023 | 0.0323 | NaN   | Ralb, Rap1a, Rras2                              |
| 169 | IL-4 Signaling                                                                 | 0.023 | 0.0323 | NaN   | Ralb, Rap1a, Rras2                              |
| 170 | HMGB1 Signaling                                                                | 0.025 | 0.024  | 1     | Mapk3, Ralb, Rap1a, Rras2                       |
| 171 | IL-1 Signaling                                                                 | 0.025 | 0.0312 | NaN   | Gnai1, Gnat1, Prkaca                            |
| 172 | Wound Healing Signaling Pathway                                                | 0.026 | 0.0198 | 1.342 | Mapk3, Ralb, Rap1a, Rras2, Stat1                |
| 173 | Gαq Signaling                                                                  | 0.026 | 0.0235 | NaN   | Calm3, Gnai1, Gnat1, Mapk3                      |
| 174 | Branched-chain α-keto acid Dehydrogenase Complex                               | 0.026 | 0.25   | NaN   | Dbt                                             |
| 175 | Eumelanin Biosynthesis                                                         | 0.026 | 0.25   | NaN   | Mif                                             |
| 176 | Mitochondrial Dysfunction                                                      | 0.026 | 0.0234 | NaN   | Atp5f1d, Ndufb5, Ndufs8, Txn2                   |
| 177 | Glioblastoma Multiforme Signaling                                              | 0.026 | 0.0234 | 1     | Mapk3, Ralb, Rap1a, Rras2                       |
| 178 | Apelin Cardiomyocyte Signaling Pathway                                         | 0.028 | 0.0303 | NaN   | Gnai1, Mapk3, Myl6                              |
| 179 | Molecular Mechanisms of Cancer                                                 | 0.028 | 0.0157 | NaN   | Gnai1, Gnat1, Mapk3, Prkaca, Ralb, Rap1a, Rras2 |
| 180 | Erythropoietin Signaling Pathway                                               | 0.030 | 0.0226 | 1     | Mapk3, Ralb, Rap1a, Rras2                       |

|     |                                                             |       |        |     |                           |
|-----|-------------------------------------------------------------|-------|--------|-----|---------------------------|
| 181 | Tumor Microenvironment Pathway                              | 0.030 | 0.0223 | 1   | Mapk3, Ralb, Rap1a, Rras2 |
| 182 | Intrinsic Prothrombin Activation Pathway                    | 0.031 | 0.0476 | NaN | Fga, Fgg                  |
| 183 | Pentose Phosphate Pathway (Oxidative Branch)                | 0.032 | 0.2    | NaN | Pgls                      |
| 184 | MIF Regulation of Innate Immunity                           | 0.034 | 0.0455 | NaN | Mapk3, Mif                |
| 185 | G Protein Signaling Mediated by Tubby                       | 0.034 | 0.0455 | NaN | Gnai1, Gnat1              |
| 186 | Paxillin Signaling                                          | 0.034 | 0.0278 | NaN | Ralb, Rap1a, Rras2        |
| 187 | IL-17 Signaling                                             | 0.035 | 0.0214 | 1   | Mapk3, Ralb, Rap1a, Rras2 |
| 188 | Oxidative Phosphorylation                                   | 0.036 | 0.027  | NaN | Atp5f1d, Ndufb5, Ndufs8   |
| 189 | iNOS Signaling                                              | 0.038 | 0.0426 | NaN | Calm3, Stat1              |
| 190 | Leukocyte Extravasation Signaling                           | 0.039 | 0.0207 | -1  | Ezr, Gnai1, Myl6, Rap1a   |
| 191 | Glycine Cleavage Complex                                    | 0.039 | 0.167  | NaN | Gcsh                      |
| 192 | nNOS Signaling in Skeletal Muscle Cells                     | 0.040 | 0.0417 | NaN | Calm3, Dmd                |
| 193 | Apelin Muscle Signaling Pathway                             | 0.040 | 0.0417 | NaN | Gnai1, Gnat1              |
| 194 | PFKFB4 Signaling Pathway                                    | 0.040 | 0.0417 | NaN | Mapk3, Prkaca             |
| 195 | Regulation of the Epithelial-Mesenchymal Transition Pathway | 0.040 | 0.0205 | NaN | Mapk3, Ralb, Rap1a, Rras2 |
| 196 | Pulmonary Healing Signaling Pathway                         | 0.043 | 0.0201 | 1   | Mapk3, Ralb, Rap1a, Rras2 |

|     |                                                            |       |        |        |                                                              |
|-----|------------------------------------------------------------|-------|--------|--------|--------------------------------------------------------------|
| 197 | Natural Killer Cell Signaling                              | 0.043 | 0.0201 | 1      | Mapk3, Ralb, Rap1a, Rras2                                    |
| 198 | G-Protein Coupled Receptor Signaling                       | 0.043 | 0.0128 | -0.333 | Calm3, Gnai1, Gnat1, Mapk3, Myl6, Prkaca, Ralb, Rap1a, Rras2 |
| 199 | Cell Cycle: G2/M DNA Damage Checkpoint Regulation          | 0.043 | 0.04   | NaN    | Skp1, Ywhae                                                  |
| 200 | Nitric Oxide Signaling in the Cardiovascular System        | 0.044 | 0.0252 | NaN    | Calm3, Mapk3, Prkaca                                         |
| 201 | Amyloid Processing                                         | 0.045 | 0.0392 | NaN    | Mapk3, Prkaca                                                |
| 202 | Neuroprotective Role of THOP1 in Alzheimer's Disease       | 0.045 | 0.025  | NaN    | Prkaca, Serpina3, Ywhae                                      |
| 203 | Acetyl-CoA Biosynthesis I (Pyruvate Dehydrogenase Complex) | 0.045 | 0.143  | NaN    | Dbt                                                          |
| 204 | Senescence Pathway                                         | 0.047 | 0.0168 | 0.447  | Calm3, Mapk3, Ralb, Rap1a, Rras2                             |
| 205 | CREB Signaling in Neurons                                  | 0.047 | 0.0132 | 1.134  | Calm3, Gnai1, Gnat1, Mapk3, Prkaca, Ralb, Rap1a, Rras2       |
| 206 | LXR/RXR Activation                                         | 0.047 | 0.0244 | NaN    | Fga, Hpx, Ttr                                                |
| 207 | RHOA Signaling                                             | 0.048 | 0.0242 | NaN    | Ezr, Myl6, Septin6                                           |
