# Supplementary material for: Retinal Proteomic Analysis in a Mouse Model of Endotoxin-Induced Uveitis Using Data-Independent Acquisition-Based Mass Spectrometry
Source: MDPI journal article supplement (doi:10.3390/ijms23126464), 2022-06-09

Figure S2. FDR analysis of combined IDA library of retina at protein level generated by Protein Pilot software

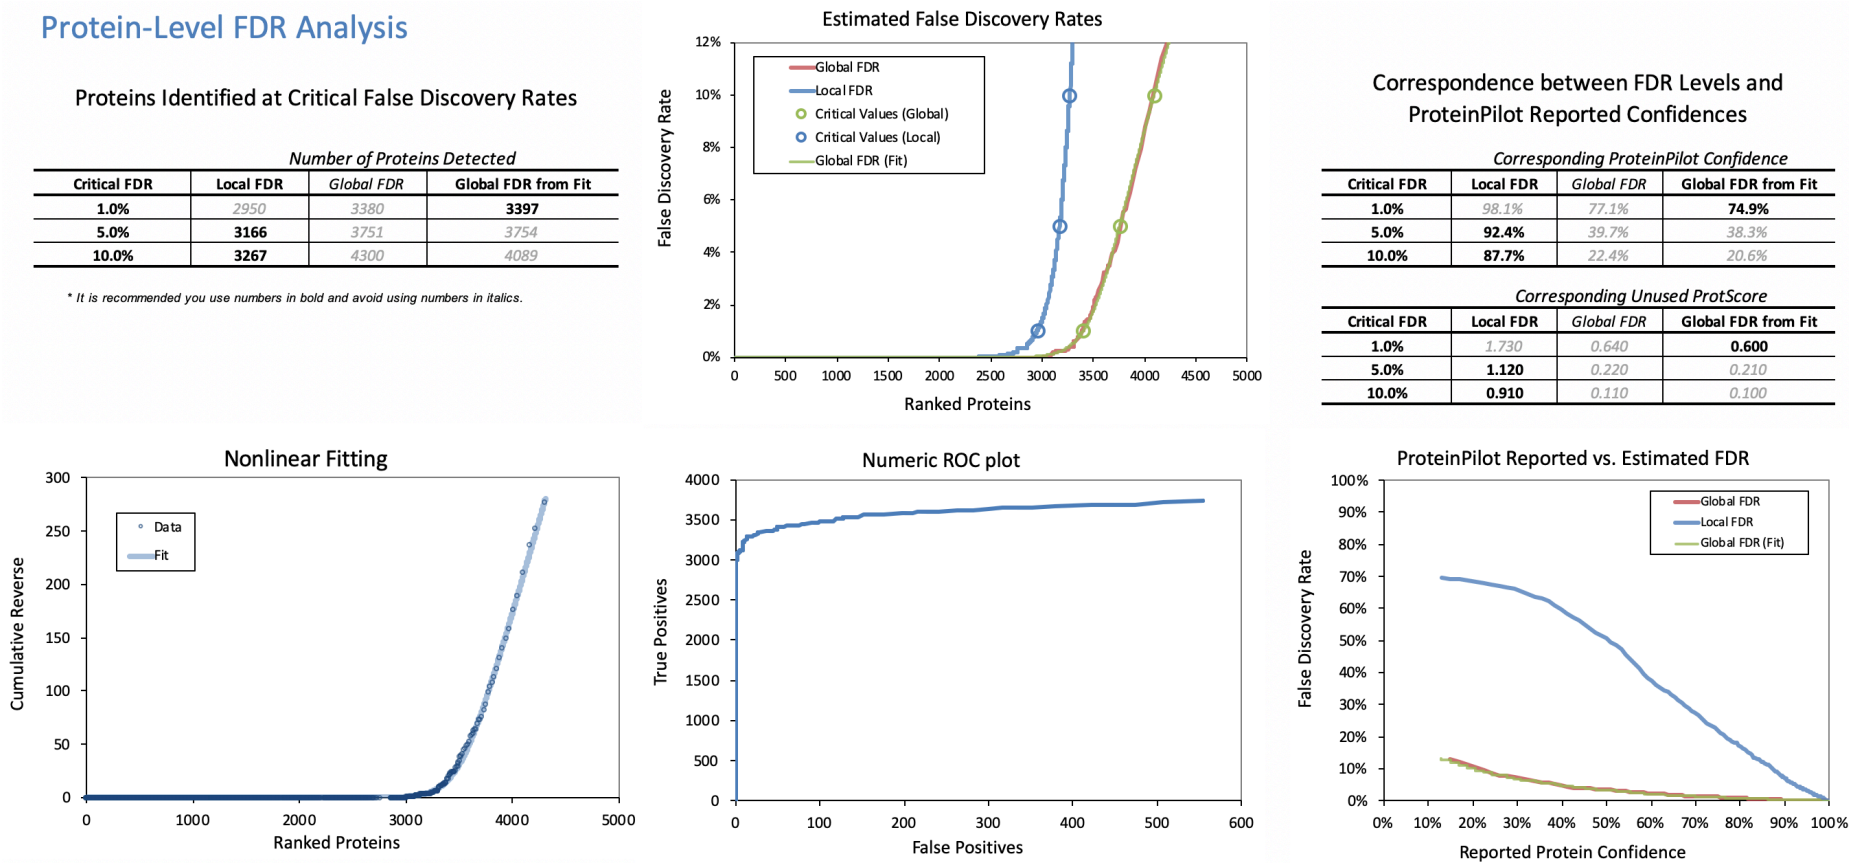

Supplement: s1 [file s1]
