# Supplementary material for: Retinal Proteomic Analysis in a Mouse Model of Endotoxin-Induced Uveitis Using Data-Independent Acquisition-Based Mass Spectrometry
Source: MDPI journal article supplement (doi:10.3390/ijms23126464), 2022-06-09

Figure S3. FDR analysis of combined IDA library of retina at peptide level generated by Protein Pilot software

Distinct Peptide Level FDR Analysis

Peptides Identified at Critical False Discovery Rates

| Number of Peptides Identified |           |            |                     |
|-------------------------------|-----------|------------|---------------------|
| Critical FDR                  | Local FDR | Global FDR | Global FDR from Fit |
| 1.0%                          | 22431     | 28853      | 29066               |
| 5.0%                          | 27096     | 35013      | 34921               |
| 10.0%                         | 29021     | 41853      | 39356               |

\* It is recommended you use numbers in bold and avoid using numbers in italics.

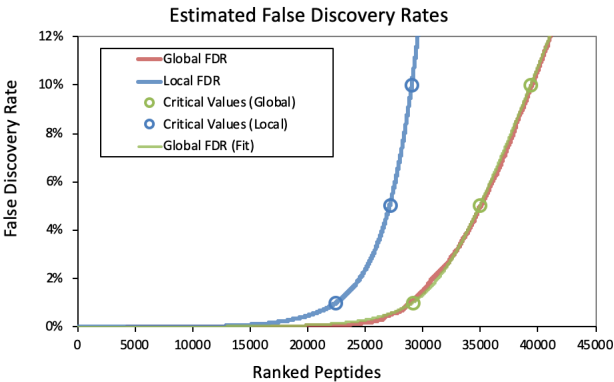

Correspondence between FDR Levels and ProteinPilot Reported Confidences

| Corresponding ProteinPilot Confidence |           |            |                     |
|---------------------------------------|-----------|------------|---------------------|
| Critical FDR                          | Local FDR | Global FDR | Global FDR from Fit |
| 1.0%                                  | 99.3%     | 90.3%      | 89.3%               |
| 5.0%                                  | 95.4%     | 47.3%      | 47.8%               |
| 10.0%                                 | 89.5%     | 29.1%      | 29.5%               |

\* It is recommended you use numbers in bold and avoid using numbers in italics.

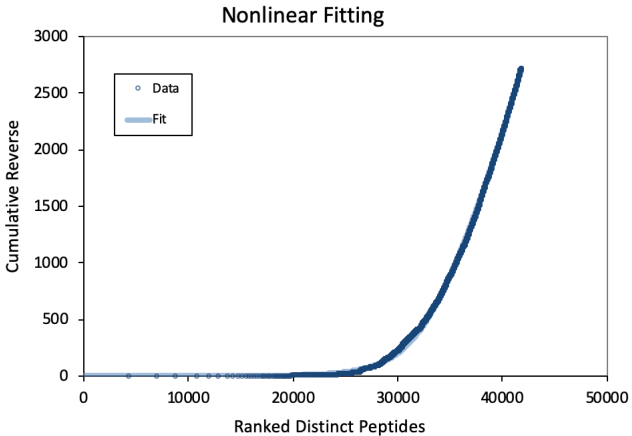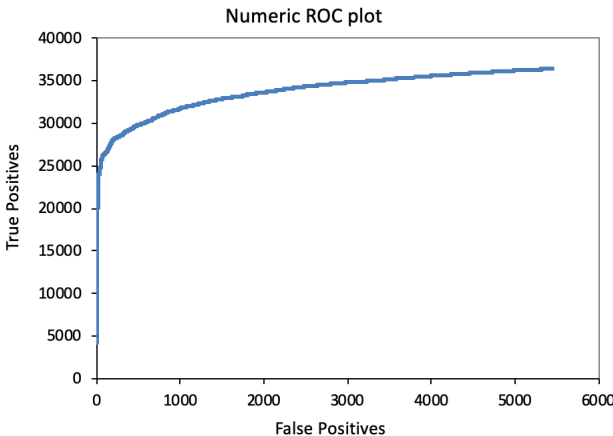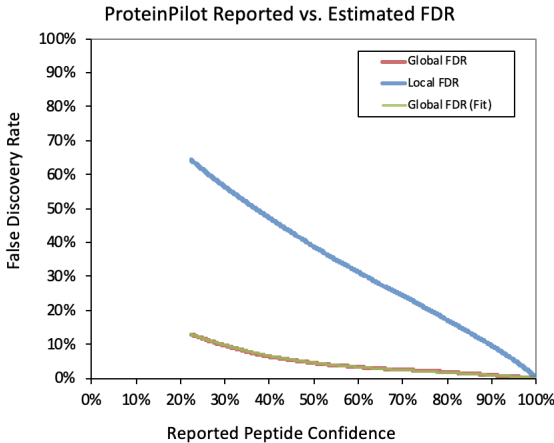

Supplement: s1 [file s1]
