# Supplementary material for: Retinal Proteomic Analysis in a Mouse Model of Endotoxin-Induced Uveitis Using Data-Independent Acquisition-Based Mass Spectrometry
Source: MDPI journal article supplement (doi:10.3390/ijms23126464), 2022-06-09
Supplement: s1 [file s1]

**Table S3.** Enriched KEGG pathways identified by STRING

| # Term ID | Term description                                          | Observed gene count | Background gene count | Strength | FDR   | Matching proteins in your network (labels)                         |
|-----------|-----------------------------------------------------------|---------------------|-----------------------|----------|-------|--------------------------------------------------------------------|
| mmu04744  | Phototransduction                                         | 4                   | 25                    | 1.32     | 0.006 | Gnat1,Calm3,Gngt1,Guca1a                                           |
| mmu04721  | Synaptic vesicle cycle                                    | 8                   | 72                    | 1.17     | 0.000 | Atp6v1f,Atp6v0d1,Vamp2,Cplx4,Atp6v1g1,Ap2s1,Dnm1,Stxbp1            |
| mmu04966  | Collecting duct acid secretion                            | 3                   | 27                    | 1.17     | 0.044 | Atp6v1f,Atp6v0d1,Atp6v1g1                                          |
| mmu00190  | Oxidative phosphorylation                                 | 9                   | 130                   | 0.96     | 0.000 | Atp6v1f,Atp6v0d1,Atp6ap1,Atp6v1g1,Ndufs8,Uqcrh,mt-Co1,Atp5d,Ndufb5 |
| mmu04727  | GABAergic synapse                                         | 6                   | 86                    | 0.96     | 0.006 | Prkaca,Gngt1,Gabrg2,Gnai1,Glul,Gls                                 |
| mmu04961  | Endocrine and other factor-regulated calcium reabsorption | 4                   | 58                    | 0.96     | 0.040 | Prkaca,Calb1,Ap2s1,Dnm1                                            |
| mmu04720  | Long-term potentiation                                    | 4                   | 63                    | 0.92     | 0.046 | Prkaca,Calm3,Mapk3,Rap1a                                           |
| mmu05211  | Renal cell carcinoma                                      | 4                   | 66                    | 0.9      | 0.047 | Mapk3,Tceb2,Rap1a,Tceb1                                            |
| mmu04971  | Gastric acid secretion                                    | 4                   | 70                    | 0.88     | 0.049 | Prkaca,Calm3,Ezr,Gnai1                                             |
| mmu05034  | Alcoholism                                                | 8                   | 147                   | 0.86     | 0.003 | Prkaca,Calm3,Gngt1,H2afx,Mapk3,Gnai1,Hist1h2bp,Hist2h2bb           |
| mmu04724  | Glutamatergic synapse                                     | 6                   | 111                   | 0.85     | 0.015 | Prkaca,Gngt1,Mapk3,Gnai1,Glul,Gls                                  |
| mmu04713  | Circadian entrainment                                     | 5                   | 93                    | 0.85     | 0.034 | Prkaca,Calm3,Gngt1,Mapk3,Gnai1                                     |
| mmu04611  | Platelet activation                                       | 6                   | 120                   | 0.82     | 0.020 | Prkaca,Fgg,Mapk3,Gnai1,Rap1a,Fga                                   |
| mmu04723  | Retrograde endocannabinoid signaling                      | 7                   | 143                   | 0.81     | 0.009 | Prkaca,Gngt1,Mapk3,Gabrg2,Gnai1,Ndufs8,Ndufb5                      |

|          |                                             |    |     |      |       |                                                                                |
|----------|---------------------------------------------|----|-----|------|-------|--------------------------------------------------------------------------------|
| mmu04371 | Apelin signaling pathway                    | 6  | 133 | 0.77 | 0.030 | Prkaca,Calm3,Gngt1,Mapk3,Ras2,<br>Gnai1                                        |
| mmu04114 | Oocyte meiosis                              | 5  | 115 | 0.76 | 0.047 | Prkaca,Calm3,Skp1a,Mapk3,Ywhae                                                 |
| mmu05012 | Parkinson disease                           | 10 | 239 | 0.74 | 0.003 | Txn2,Prkaca,Calm3,Txn1,Gnai1,<br>Ndufs8,Uqcrh,mt-<br>Co1,Atp5d,Ndufb5          |
| mmu05203 | Viral carcinogenesis                        | 7  | 194 | 0.68 | 0.034 | Prkaca,Atp6v0d1,Mapk3,Ywhae,<br>Hist1h2bp,Ranbp1,Hist2h2bb                     |
| mmu04014 | Ras signaling pathway                       | 7  | 224 | 0.62 | 0.047 | Ralb,Prkaca,Calm3,Gngt1,Mapk3,<br>Ras2,Rap1a                                   |
| mmu05170 | Human immunodeficiency<br>virus 1 infection | 7  | 222 | 0.62 | 0.047 | Calm3,Gngt1,Skp1a,Mapk3,Tceb2,<br>Gnai1,Tceb1                                  |
| mmu04714 | Thermogenesis                               | 7  | 225 | 0.61 | 0.047 | Prkaca,Ndufs8,Uqcrh,mt-<br>Co1,Atp5d,Ndufb5,Actl6b                             |
| mmu05200 | Pathways in cancer                          | 12 | 528 | 0.48 | 0.034 | Ralb,Msh6,Prkaca,Calm3,Mgst3,<br>Gngt1,Skp1a,Mapk3,Tceb2,Stat1,<br>Gnai1,Tceb1 |
