# Supplementary material for: Retinal Proteomic Analysis in a Mouse Model of Endotoxin-Induced Uveitis Using Data-Independent Acquisition-Based Mass Spectrometry
Source: MDPI journal article supplement (doi:10.3390/ijms23126464), 2022-06-09
Supplement: s1 [file s1]

**Table S5.** Primer sequence for qRT-PCR analyses

| <b>Gene</b>  | <b>Forward Primer (5'-3')</b> | <b>Reverse Primer (5'-3')</b> |
|--------------|-------------------------------|-------------------------------|
| GAPDH        | GTAGAGGGCATGGTGATTTTCCT       | CACAGTCTTCTGAGTGGCAGTGAT      |
| IL-1 $\beta$ | CACCCTGCAGCTGGAGAGT           | GACAAACCGCTTTTCCATCTTC        |
| IL-6         | TAGTCCTTCCTACCCCAATTTCC       | TTGGTCCTTAGCCACTCCTTC         |
| iNOS         | TGACGGCAAACATGACTTCAG         | GCCATCGGGCATCTGGTA            |
| TLR4         | ATGGCATGGCTTACACCACC          | GAGGCCAATTTTGTCTCCACA         |
| HP           | GCACTTGGTTCGCTATCGCT          | GCTTCTCGTCGTTTAAGGTGTA        |
| HPX          | AGCAGTGGCGCTAAATATCCT         | CAACTCTCCCGTTGGCAGTA          |
| FGG          | ACCAGAGATAACTGTTGCATCCT       | CCACGTCGGTTTGTAAGAAG          |
