# Supplementary material for: Retinal Proteomic Analysis in a Mouse Model of Endotoxin-Induced Uveitis Using Data-Independent Acquisition-Based Mass Spectrometry
Source: MDPI journal article supplement (doi:10.3390/ijms23126464), 2022-06-09
Supplement: s1 [file s1]

**Table S2.** All differentially expressed proteins identified (Fold change>1.4 or <-1.4,  $p$ <0.05, unpaired t-test).

| No. | Uniprot ID | Gene names | Protein names                                                                                                                         | Fold change | $p$ -value |
|-----|------------|------------|---------------------------------------------------------------------------------------------------------------------------------------|-------------|------------|
| 1   | B2RWH3     | Hist2h2aa1 | Histone H2A                                                                                                                           | 13.450      | 0.003      |
| 2   | Q3UBS3     | Hp         | Haptoglobin                                                                                                                           | 11.649      | 0.000      |
| 3   | Q91X72     | Hpx        | Hemopexin                                                                                                                             | 4.584       | 0.000      |
| 4   | P43274     | H14        | Histone H1.4 (H1 VAR.2) (H1e)                                                                                                         | 4.519       | 0.019      |
| 5   | Q8CGP2     | Hist1h2bp  | Histone H2B type 1-P                                                                                                                  | 4.344       | 0.010      |
| 6   | Q3UER8     | Fgg        | Fibrinogen gamma chain                                                                                                                | 4.177       | 0.000      |
| 7   | E9PV24     | Fga        | Fibrinogen alpha chain [Cleaved into: Fibrinopeptide A;<br>Fibrinogen alpha chain]                                                    | 3.690       | 0.000      |
| 8   | Q64525     | Hist2h2bb  | Histone H2B type 2-B (H2b 616)                                                                                                        | 3.307       | 0.013      |
| 9   | Q9D0J8     | Ptms       | Parathymosin                                                                                                                          | 3.082       | 0.007      |
| 10  | Q1WWK3     | H1f5       | Hist1h1b protein (Fragment)                                                                                                           | 2.537       | 0.023      |
| 11  | B2RTM0     | Hist2h4    | Histone H4                                                                                                                            | 2.366       | 0.037      |
| 12  | D3YTR5     | Mbd3       | Methyl-CpG-binding domain protein 3                                                                                                   | 2.191       | 0.001      |
| 13  | P11531     | Dmd        | Dystrophin                                                                                                                            | 2.050       | 0.003      |
| 14  | Q9CZU7     | Lamp2      | Uncharacterized protein                                                                                                               | 2.042       | 0.000      |
| 15  | Q8VC72     | Ndufs8     | Complex I-23kD (NADH dehydrogenase [ubiquinone] iron-sulfur protein 8, mitochondrial) (NADH-ubiquinone oxidoreductase 23 kDa subunit) | 2.019       | 0.000      |
| 16  | P62274     | Rps29      | 40S ribosomal protein S29                                                                                                             | 1.980       | 0.000      |
| 17  | Q52L78     | Cryab      | Alpha(B)-crystallin (Alpha-crystallin B chain)                                                                                        | 1.914       | 0.029      |

|    |            |          |                                                                                                                                                 |       |       |
|----|------------|----------|-------------------------------------------------------------------------------------------------------------------------------------------------|-------|-------|
| 18 | Q5XK38     | Hmgn2    | Hmgn2 protein (Non-histone chromosomal protein HMG-17)                                                                                          | 1.865 | 0.007 |
| 19 | B9EHY2     | Zmpste24 | CAAX prenyl protease (EC 3.4.24.84)                                                                                                             | 1.843 | 0.016 |
| 20 | D3Z383     | Mest     | Mesoderm-specific transcript protein                                                                                                            | 1.810 | 0.001 |
| 21 | E9QLB2     | Lyplal1  | Lysophospholipase-like protein 1                                                                                                                | 1.749 | 0.019 |
| 22 | Q8BHB9     | Clic6    | Chloride intracellular channel protein 6                                                                                                        | 1.741 | 0.000 |
| 23 | Q9D2D1     | Ctsa     | Carboxypeptidase (EC 3.4.16.-)                                                                                                                  | 1.739 | 0.005 |
| 24 | O08599     | Stxbp1   | Syntaxin-binding protein 1 (Protein unc-18 homolog 1) (Unc18-1)<br>(Protein unc-18 homolog A) (Unc-18A)                                         | 1.727 | 0.000 |
| 25 | Q5NC81     | Nme1     | Nucleoside diphosphate kinase (EC 2.7.4.6)                                                                                                      | 1.715 | 0.000 |
| 26 | Q9ES97-3   | Rtn3     | Reticulon-3                                                                                                                                     | 1.710 | 0.000 |
| 27 | Q9D323     | Stat1    | Signal transducer and activator of transcription                                                                                                | 1.707 | 0.007 |
| 28 | P39053     | Dnm1     | Dynamin-1 (EC 3.6.5.5)                                                                                                                          | 1.705 | 0.001 |
| 29 | Q8CCG5     | Ralb     | Small monomeric GTPase (EC 3.6.5.2)                                                                                                             | 1.694 | 0.004 |
| 30 | Q545Q2     | Surf4    | Surfeit locus protein 4                                                                                                                         | 1.667 | 0.000 |
| 31 | Q3U0T9     | Rab35    | Rab35                                                                                                                                           | 1.645 | 0.003 |
| 32 | A0A087WNP6 | Cdv3     | Protein CDV3                                                                                                                                    | 1.640 | 0.002 |
| 33 | P83870     | Phf5a    | PHD finger-like domain-containing protein 5A (PHD finger-like<br>domain protein 5A) (Splicing factor 3B-associated 14 kDa<br>protein) (SF3b14b) | 1.636 | 0.000 |
| 34 | Q6PGH1     | Bud31    | Protein BUD31 homolog (Protein G10 homolog)                                                                                                     | 1.635 | 0.001 |
| 35 | Q3UMA3     | Hgs      | Hepatocyte growth factor-regulated tyrosine kinase substrate                                                                                    | 1.611 | 0.000 |
| 36 | A0A087WSR7 | Agfg1    | Arf-GAP domain and FG repeat-containing protein 1                                                                                               | 1.596 | 0.040 |

|    |            |         |                                                                                                                                                                        |       |       |
|----|------------|---------|------------------------------------------------------------------------------------------------------------------------------------------------------------------------|-------|-------|
| 37 | Q571E2     | Atp6ap1 | MFLJ00383 protein (Fragment)                                                                                                                                           | 1.588 | 0.000 |
| 38 | Q8C8H5     | Gabrg2  | Uncharacterized protein                                                                                                                                                | 1.587 | 0.000 |
| 39 | Q9CPU4     | Mgst3   | Microsomal glutathione S-transferase 3 (Microsomal GST-3) (Glutathione peroxidase MGST3) (EC 1.11.1.-) (Microsomal glutathione S-transferase III) (Microsomal GST-III) | 1.581 | 0.000 |
| 40 | Q8BLF1     | Nceh1   | Neutral cholesterol ester hydrolase 1 (NCEH) (EC 3.1.1.-) (Arylacetamide deacetylase-like 1) (Chlorpyrifos oxon-binding protein) (CPO-BP)                              | 1.577 | 0.000 |
| 41 | Q52KP0     | Rpl38   | 60S ribosomal protein L38                                                                                                                                              | 1.571 | 0.002 |
| 42 | Q7TNR6     | Igsf21  | Immunoglobulin superfamily member 21 (IgSF21)                                                                                                                          | 1.559 | 0.000 |
| 43 | Q3UJ76     | Ap2s1   | AP complex subunit sigma                                                                                                                                               | 1.550 | 0.002 |
| 44 | Q61838     | Pzp     | Pregnancy zone protein (Alpha-2-macroglobulin) (Alpha-2-M) [Cleaved into: Alpha-2-macroglobulin 165 kDa subunit; Alpha-2-macroglobulin 35 kDa subunit]                 | 1.534 | 0.039 |
| 45 | Q8BG13     | Rbm3    | RNA-binding protein 3 (Rbm3 protein)                                                                                                                                   | 1.530 | 0.000 |
| 46 | Q4KML7     | Ezr     | Ezrin                                                                                                                                                                  | 1.525 | 0.013 |
| 47 | Q7TN25     | Sf3a2   | Sf3a2 protein                                                                                                                                                          | 1.521 | 0.000 |
| 48 | A0A0A0MQM0 | Eif5a   | Eukaryotic translation initiation factor 5A (eIF-5A) (Fragment)                                                                                                        | 1.504 | 0.000 |
| 49 | B2RXS4     | Plxnb2  | Plexin-B2                                                                                                                                                              | 1.491 | 0.000 |
| 50 | Q8BU20     | Ndufb5  | Complex I-SGDH (NADH dehydrogenase [ubiquinone] 1 beta subcomplex subunit 5, mitochondrial) (NADH-ubiquinone oxidoreductase SGDh subunit)                              | 1.487 | 0.010 |

|    |            |           |                                                                                                                                                                                                                                                                     |       |       |
|----|------------|-----------|---------------------------------------------------------------------------------------------------------------------------------------------------------------------------------------------------------------------------------------------------------------------|-------|-------|
| 51 | Q3U9X2     | Lsm2      | U6 snRNA-associated Sm-like protein LSm2                                                                                                                                                                                                                            | 1.484 | 0.002 |
| 52 | D3Z7P3     | Gls       | Glutaminase kidney isoform, mitochondrial (GLS) (EC 3.5.1.2) [Cleaved into: Glutaminase kidney isoform, mitochondrial 68 kDa chain; Glutaminase kidney isoform, mitochondrial 65 kDa chain]                                                                         | 1.481 | 0.019 |
| 53 | Q9DAK9     | Phpt1     | 14 kDa phosphohistidine phosphatase (EC 3.9.1.3) (Phosphohistidine phosphatase 1) (PHPT1) (Protein histidine phosphatase) (PHP)                                                                                                                                     | 1.480 | 0.004 |
| 54 | P05132     | Prkaca    | cAMP-dependent protein kinase catalytic subunit alpha (PKA C-alpha) (EC 2.7.11.11)                                                                                                                                                                                  | 1.470 | 0.006 |
| 55 | Q8C8Y5     | Samd7     | Sterile alpha motif domain-containing protein 7 (SAM domain-containing protein 7)                                                                                                                                                                                   | 1.470 | 0.022 |
| 56 | P62071     | Rras2     | Ras-related protein R-Ras2 (EC 3.6.5.-)                                                                                                                                                                                                                             | 1.467 | 0.040 |
| 57 | F6WDS8     | Rgs6      | Regulator of G-protein-signaling 6                                                                                                                                                                                                                                  | 1.462 | 0.002 |
| 58 | P27661     | H2ax      | Histone H2AX (H2a/x) (Histone H2A.X)                                                                                                                                                                                                                                | 1.459 | 0.005 |
| 59 | Q69ZK9     | Nlgn2     | Neuroligin-2                                                                                                                                                                                                                                                        | 1.455 | 0.029 |
| 60 | Q7TND9     | Dbt       | Dihydrolipoamide acetyltransferase component of pyruvate dehydrogenase complex (EC 2.3.1.-)                                                                                                                                                                         | 1.448 | 0.016 |
| 61 | Q9D0L7     | Armc10    | Armadillo repeat-containing protein 10                                                                                                                                                                                                                              | 1.444 | 0.025 |
| 62 | A0A0R4J0I1 | Serpina3k | Serine protease inhibitor A3K                                                                                                                                                                                                                                       | 1.439 | 0.028 |
| 63 | Q63844     | Mapk3     | Mitogen-activated protein kinase 3 (MAP kinase 3) (MAPK 3) (EC 2.7.11.24) (ERT2) (Extracellular signal-regulated kinase 1) (ERK-1) (Insulin-stimulated MAP2 kinase) (MAP kinase isoform p44) (p44-MAPK) (MNK1) (Microtubule-associated protein 2 kinase) (p44-ERK1) | 1.439 | 0.001 |

|    |        |         |                                                                                                                                                   |       |       |
|----|--------|---------|---------------------------------------------------------------------------------------------------------------------------------------------------|-------|-------|
| 64 | Q8C2N9 | Msh6    | DNA mismatch repair protein                                                                                                                       | 1.437 | 0.035 |
| 65 | Q5M8Q0 | Rpl15   | Ribosomal protein L15                                                                                                                             | 1.429 | 0.000 |
| 66 | Q3TF81 | Rpp30   | Uncharacterized protein (Fragment)                                                                                                                | 1.426 | 0.006 |
| 67 | Q8C7S2 | Lima1   | LIM zinc-binding domain-containing protein                                                                                                        | 1.423 | 0.026 |
| 68 | Q8BFY6 | Pef1    | Peflin (PEF protein with a long N-terminal hydrophobic domain) (Penta-EF hand domain-containing protein 1)                                        | 1.414 | 0.000 |
| 69 | Q3V424 | Snrpg   | Small nuclear ribonucleoprotein G (snRNP-G)                                                                                                       | 1.412 | 0.000 |
| 70 | Q91VM5 | Rbmx11  | RNA binding motif protein, X-linked-like-1 (Heterogeneous nuclear ribonucleoprotein G-like 1) (RNA binding motif protein, X chromosome retrogene) | 1.412 | 0.009 |
| 71 | Q80ZX0 | Sec24b  | Sec24-related gene family, member B (S. cerevisiae)                                                                                               | 1.412 | 0.011 |
| 72 | Q3UUU4 | Septin6 | Septin                                                                                                                                            | 1.407 | 0.025 |
| 73 | Q9Z0W3 | Nup160  | Nuclear pore complex protein Nup160 (160 kDa nucleoporin) (Gene trap locus 1-13 protein) (GTL-13) (Nucleoporin Nup160)                            | 1.406 | 0.003 |
| 74 | Q9D7P1 | Rps24   | 40S ribosomal protein S24                                                                                                                         | 1.406 | 0.000 |
| 75 | D3Z645 | Vps29   | Vacuolar protein sorting-associated protein 29 (Vesicle protein sorting 29)                                                                       | 1.405 | 0.001 |
| 76 | Q9MD68 | mtCo1   | Cytochrome c oxidase subunit 1 (EC 7.1.1.9)                                                                                                       | 1.403 | 0.003 |
| 77 | P15105 | Glul    | Glutamine synthetase (GS) (EC 6.3.1.2) (Glutamate--ammonia ligase) (Palmitoyltransferase GLUL) (EC 2.3.1.225)                                     | 1.403 | 0.001 |

|    |        |        |                                                                                                                                                                                                                                                |        |       |
|----|--------|--------|------------------------------------------------------------------------------------------------------------------------------------------------------------------------------------------------------------------------------------------------|--------|-------|
| 78 | Q99LR1 | Abhd12 | Lysophosphatidylserine lipase ABHD12 (EC 3.1.1.-) (2-arachidonoylglycerol hydrolase ABHD12) (Abhydrolase domain-containing protein 12) (Monoacylglycerol lipase ABHD12) (EC 3.1.1.23) (Oxidized phosphatidylserine lipase ABHD12) (EC 3.1.-.-) | 1.401  | 0.000 |
| 79 | B0QZN5 | Vamp2  | Synaptobrevin-2 (Vesicle-associated membrane protein 2)                                                                                                                                                                                        | 1.400  | 0.000 |
| 80 | P56375 | Acyp2  | Acylphosphatase-2 (EC 3.6.1.7) (Acylphosphatase, muscle type isozyme) (Acylphosphate phosphohydrolase 2)                                                                                                                                       | -1.403 | 0.034 |
| 81 | Q8R2Y8 | Pthr2  | Peptidyl-tRNA hydrolase 2, mitochondrial (PTH 2) (EC 3.1.1.29)                                                                                                                                                                                 | -1.406 | 0.001 |
| 82 | Q4FZH7 | Erh    | Enhancer of rudimentary homolog                                                                                                                                                                                                                | -1.410 | 0.022 |
| 83 | Q69ZS5 | Epn2   | MKIAA1065 protein (Fragment)                                                                                                                                                                                                                   | -1.413 | 0.001 |
| 84 | O70251 | Eef1b  | Elongation factor 1-beta (EF-1-beta)                                                                                                                                                                                                           | -1.415 | 0.014 |
| 85 | Q548W7 | Dbi    | Diazepam binding inhibitor                                                                                                                                                                                                                     | -1.417 | 0.008 |
| 86 | P10639 | Txn    | Thioredoxin (Trx) (ATL-derived factor) (ADF)                                                                                                                                                                                                   | -1.419 | 0.006 |
| 87 | P62869 | Elob   | Elongin-B (EloB) (Elongin 18 kDa subunit) (RNA polymerase II transcription factor SIII subunit B) (SIII p18) (Transcription elongation factor B polypeptide 2)                                                                                 | -1.423 | 0.005 |
| 88 | Q6PGG8 | Tdrkh  | Tdrkh protein                                                                                                                                                                                                                                  | -1.435 | 0.046 |
| 89 | Q61081 | Cdc37  | Hsp90 co-chaperone Cdc37 (Hsp90 chaperone protein kinase-targeting subunit) (p50Cdc37) [Cleaved into: Hsp90 co-chaperone Cdc37, N-terminally processed]                                                                                        | -1.437 | 0.002 |
| 90 | Q3TN35 | Sgta   | SGTA_dimer domain-containing protein                                                                                                                                                                                                           | -1.445 | 0.005 |

|     |          |          |                                                                                                                                                                                               |        |       |
|-----|----------|----------|-----------------------------------------------------------------------------------------------------------------------------------------------------------------------------------------------|--------|-------|
| 91  | Q8R1W8   | Impg1    | Interphotoreceptor matrix proteoglycan 1 (Interphotoreceptor matrix proteoglycan of 150 kDa) (IPM-150) (Sialoprotein associated with cones and rods)                                          | -1.446 | 0.001 |
| 92  | Q3UL54   | Rsl1d1   | Uncharacterized protein                                                                                                                                                                       | -1.446 | 0.005 |
| 93  | Q3USR8   | Ctcf     | Uncharacterized protein (Fragment)                                                                                                                                                            | -1.448 | 0.033 |
| 94  | Q5HZY7   | Atp6v1g1 | V-type proton ATPase subunit G                                                                                                                                                                | -1.453 | 0.002 |
| 95  | S4R1M2   | Safb     | Scaffold attachment factor B1                                                                                                                                                                 | -1.453 | 0.018 |
| 96  | Q3UHE1-2 | Pitpnm3  | Membrane-associated phosphatidylinositol transfer protein 3 (Phosphatidylinositol transfer protein, membrane-associated 3) (PITPnm 3) (Pyk2 N-terminal domain-interacting receptor 1) (NIR-1) | -1.466 | 0.039 |
| 97  | P20612   | Gnat1    | Guanine nucleotide-binding protein G(t) subunit alpha-1 (Transducin alpha-1 chain)                                                                                                            | -1.470 | 0.000 |
| 98  | P60840   | Ensa     | Alpha-endosulfine (ARPP-19e)                                                                                                                                                                  | -1.478 | 0.000 |
| 99  | Q3TX06   | Gorasp2  | Uncharacterized protein                                                                                                                                                                       | -1.489 | 0.002 |
| 100 | Q9D1L0   | Chchd2   | Coiled-coil-helix-coiled-coil-helix domain-containing protein 2                                                                                                                               | -1.490 | 0.000 |
| 101 | Q8BR63   | Fam177a1 | Protein FAM177A1                                                                                                                                                                              | -1.497 | 0.023 |
| 102 | Q9CPX4   | Ftl1     | Ferritin                                                                                                                                                                                      | -1.506 | 0.017 |
| 103 | Q3ULK8   | Cnbp     | Uncharacterized protein                                                                                                                                                                       | -1.507 | 0.000 |
| 104 | Q4FJN2   | Fkbp5    | Peptidylprolyl isomerase (EC 5.2.1.8)                                                                                                                                                         | -1.510 | 0.001 |
| 105 | Q7TN29   | Smap2    | Stromal membrane-associated protein 2 (Stromal membrane-associated protein 1-like)                                                                                                            | -1.512 | 0.007 |
| 106 | Q5M9J2   | Hint2    | Histidine triad nucleotide binding protein 2                                                                                                                                                  | -1.527 | 0.004 |

|     |            |         |                                                                                                                                                                                                     |        |       |
|-----|------------|---------|-----------------------------------------------------------------------------------------------------------------------------------------------------------------------------------------------------|--------|-------|
| 107 | Q9CQ60     | Pgls    | 6-phosphogluconolactonase (6PGL) (EC 3.1.1.31)                                                                                                                                                      | -1.527 | 0.003 |
| 108 | Q80YD1     | Supv3l1 | ATP-dependent RNA helicase SUPV3L1, mitochondrial (EC 3.6.4.13) (Suppressor of var1 3-like protein 1) (SUV3-like protein 1)                                                                         | -1.528 | 0.016 |
| 109 | Q545F0     | Mif     | Macrophage migration inhibitory factor                                                                                                                                                              | -1.539 | 0.004 |
| 110 | Q564F6     | Pdcd5   | Programmed cell death 5                                                                                                                                                                             | -1.549 | 0.000 |
| 111 | Q91ZZ3     | Sncb    | Beta-synuclein                                                                                                                                                                                      | -1.555 | 0.001 |
| 112 | P62627     | Dynlrb1 | Dynein light chain roadblock-type 1 (Dynein light chain 2A, cytoplasmic)                                                                                                                            | -1.579 | 0.000 |
| 113 | Q5M9K1     | Ttr     | Transthyretin                                                                                                                                                                                       | -1.582 | 0.010 |
| 114 | Q9D0J2     | Atp5d   | ATP synthase F1 subunit delta                                                                                                                                                                       | -1.584 | 0.000 |
| 115 | Q3U9A8     | Sh3bgrl | SH3 domain-binding glutamic acid-rich-like protein                                                                                                                                                  | -1.585 | 0.002 |
| 116 | A0A7N9VR94 | Ahnak2  | AHNAK nucleoprotein 2                                                                                                                                                                               | -1.590 | 0.002 |
| 117 | Q3V3N5     | Gnl2    | Nucleolar GTP-binding protein 2 (Fragment)                                                                                                                                                          | -1.605 | 0.012 |
| 118 | P84075     | Hpca    | Neuron-specific calcium-binding protein hippocalcin                                                                                                                                                 | -1.606 | 0.014 |
| 119 | P62835     | Rap1a   | Ras-related protein Rap-1A (EC 3.6.5.2) (Ras-related protein Krev-1)                                                                                                                                | -1.606 | 0.015 |
| 120 | Q8K124     | Plekho2 | Pleckstrin homology domain-containing family O member 2 (PH domain-containing family O member 2) (Pleckstrin homology domain-containing family Q member 1) (PH domain-containing family Q member 1) | -1.611 | 0.002 |



|     |            |        |                                                                                                                   |        |       |
|-----|------------|--------|-------------------------------------------------------------------------------------------------------------------|--------|-------|
| 121 | Q9JKB3     | Ybx3   | Y-box-binding protein 3 (Cold shock domain-containing protein A) (DNA-binding protein A) (Y-box protein 3)        | -1.620 | 0.000 |
| 122 | P62075     | Timm13 | Mitochondrial import inner membrane translocase subunit Tim13                                                     | -1.640 | 0.010 |
| 123 | Q3UM23     | Rnh1   | Ribonuclease inhibitor (Ribonuclease/angiogenin inhibitor 1)                                                      | -1.649 | 0.000 |
| 124 | P27546-2   | Map4   | Microtubule-associated protein 4 (MAP-4)                                                                          | -1.650 | 0.001 |
| 125 | B2RSH2     | Gnai1  | Guanine nucleotide-binding protein G(i) subunit alpha-1 (Adenylate cyclase-inhibiting G alpha protein)            | -1.659 | 0.023 |
| 126 | Q8R5L1     | C1qbp  | Complement component 1 Q subcomponent-binding protein, mitochondrial                                              | -1.663 | 0.003 |
| 127 | Q3TXU8     | Pgrmc1 | Cytochrome b5 heme-binding domain-containing protein                                                              | -1.669 | 0.004 |
| 128 | Q8VD33     | Sgtb   | Small glutamine-rich tetratricopeptide repeat-containing protein beta (Beta-SGT)                                  | -1.676 | 0.001 |
| 129 | B2RTP7     | Krt2   | Krt2 protein                                                                                                      | -1.692 | 0.035 |
| 130 | Q71M36     | Cspg5  | Chondroitin sulfate proteoglycan 5 (Acidic leucine-rich EGF-like domain-containing brain protein) (Neuroglycan C) | -1.715 | 0.001 |
| 131 | A0A0N4SUH8 | Nfu1   | NFU1 iron-sulfur cluster scaffold homolog, mitochondrial                                                          | -1.718 | 0.000 |
| 132 | Q80XH2     | Impg2  | Interphotoreceptor matrix proteoglycan 2 (Sialoprotein associated with cones and rods proteoglycan) (Spacrcan)    | -1.745 | 0.001 |
| 133 | Q5SS40     | Ywhae  | 14_3_3 domain-containing protein                                                                                  | -1.759 | 0.001 |

|     |            |          |                                                                                                                                                                            |        |       |
|-----|------------|----------|----------------------------------------------------------------------------------------------------------------------------------------------------------------------------|--------|-------|
| 134 | Q08331     | Calb2    | Calretinin (CR)                                                                                                                                                            | -1.801 | 0.000 |
| 135 | P34022     | Ranbp1   | Ran-specific GTPase-activating protein (HpaII tiny fragments locus 9a protein) (Ran-binding protein 1) (RANBP1)                                                            | -1.813 | 0.003 |
| 136 | Q9CV53     | Gcsh     | Glycine cleavage system H protein (Fragment)                                                                                                                               | -1.815 | 0.006 |
| 137 | Q99MR0     | Actl6b   | Actin-like protein 6B (53 kDa BRG1-associated factor B) (Actin-related protein Baf53b) (ArpN-alpha) (ArpNa) (BRG1-associated factor 53B) (BAF53B)                          | -1.839 | 0.028 |
| 138 | D3YXH0     | Gm49948  | Predicted gene, 49948                                                                                                                                                      | -1.842 | 0.001 |
| 139 | Q14C38     | Tceal5   | Transcription elongation factor A (SII)-like 5                                                                                                                             | -1.844 | 0.000 |
| 140 | Q4V9T8     | Eif1     | Eukaryotic translation initiation factor 1                                                                                                                                 | -1.853 | 0.001 |
| 141 | P43081     | Guca1a   | Guanylyl cyclase-activating protein 1 (GCAP 1) (Guanylate cyclase activator 1A)                                                                                            | -1.873 | 0.000 |
| 142 | Q9DBZ5     | Eif3k    | Eukaryotic translation initiation factor 3 subunit K (eIF3k) (Eukaryotic translation initiation factor 3 subunit 12) (eIF-3 p25)                                           | -1.874 | 0.000 |
| 143 | A0A0A1HAM8 | Marcks   | 80K protein                                                                                                                                                                | -1.926 | 0.000 |
| 144 | Q9D1J2     | Cope     | Coatomer subunit epsilon                                                                                                                                                   | -1.978 | 0.003 |
| 145 | P51863     | Atp6v0d1 | V-type proton ATPase subunit d 1 (V-ATPase subunit d 1) (P39) (Physophilin) (V-ATPase 40 kDa accessory protein) (V-ATPase AC39 subunit) (Vacuolar proton pump subunit d 1) | -1.982 | 0.006 |
| 146 | Q6IRU5     | Cltb     | Clathrin light chain B (Lcb)                                                                                                                                               | -2.039 | 0.028 |
| 147 | A0A087WQE6 | Eloc     | Elongin-C (Fragment)                                                                                                                                                       | -2.053 | 0.000 |

|     |        |         |                                                                                                                                                                                                                                     |        |       |
|-----|--------|---------|-------------------------------------------------------------------------------------------------------------------------------------------------------------------------------------------------------------------------------------|--------|-------|
| 148 | P99028 | Uqcrh   | Cytochrome b-c1 complex subunit 6, mitochondrial (Complex III subunit 6) (Complex III subunit VIII) (Cytochrome c1 non-heme 11 kDa protein) (Mitochondrial hinge protein) (Ubiquinol-cytochrome c reductase complex 11 kDa protein) | -2.066 | 0.008 |
| 149 | Q642K0 | Myl6    | Myl6 protein (Myosin, light polypeptide 6, alkali, smooth muscle and non-muscle)                                                                                                                                                    | -2.172 | 0.002 |
| 150 | P06837 | Gap43   | Neuromodulin (Axonal membrane protein GAP-43) (Calmodulin-binding protein P-57) (Growth-associated protein 43)                                                                                                                      | -2.180 | 0.000 |
| 151 | F8WIA1 | Clip1   | CAP-Gly domain-containing linker protein 1                                                                                                                                                                                          | -2.192 | 0.020 |
| 152 | Q9JKB1 | Uchl3   | Ubiquitin carboxyl-terminal hydrolase isozyme L3 (UCH-L3) (EC 3.4.19.12) (Ubiquitin thioesterase L3)                                                                                                                                | -2.205 | 0.003 |
| 153 | P12658 | Calb1   | Calbindin (Calbindin D28) (D-28K) (PCD-29) (Spot 35 protein) (Vitamin D-dependent calcium-binding protein, avian-type)                                                                                                              | -2.274 | 0.007 |
| 154 | Q9D1K2 | Atp6v1f | V-type proton ATPase subunit F (V-ATPase subunit F) (V-ATPase 14 kDa subunit) (Vacuolar proton pump subunit F)                                                                                                                      | -2.335 | 0.000 |
| 155 | B1AWD9 | Clta    | Clathrin light chain                                                                                                                                                                                                                | -2.340 | 0.012 |
| 156 | P99027 | Rplp2   | 60S acidic ribosomal protein P2                                                                                                                                                                                                     | -2.378 | 0.003 |
| 157 | G3UZY2 | Txn2    | Thioredoxin, mitochondrial (Fragment)                                                                                                                                                                                               | -2.458 | 0.000 |
| 158 | Q80WM3 | Cplx4   | Complexin-4 (Complexin IV) (CPX IV)                                                                                                                                                                                                 | -2.534 | 0.002 |
| 159 | Q61012 | Gngt1   | Guanine nucleotide-binding protein G(T) subunit gamma-T1 (Transducin gamma chain)                                                                                                                                                   | -2.565 | 0.025 |

|     |            |        |                                                                                                                         |        |       |
|-----|------------|--------|-------------------------------------------------------------------------------------------------------------------------|--------|-------|
| 160 | Q6W8Q3     | Pcp4l1 | Purkinje cell protein 4-like protein 1 (PCP4-like protein 1)                                                            | -2.568 | 0.000 |
| 161 | Q3TE95     | Rcn2   | Uncharacterized protein                                                                                                 | -2.569 | 0.000 |
| 162 | Q05186     | Rcn1   | Reticulocalbin-1                                                                                                        | -2.642 | 0.000 |
| 163 | P60879     | Snap25 | Synaptosomal-associated protein 25 (SNAP-25) (Super protein) (SUP) (Synaptosomal-associated 25 kDa protein)             | -2.695 | 0.000 |
| 164 | Q3U6E4     | Ptma   | Uncharacterized protein                                                                                                 | -2.933 | 0.000 |
| 165 | A0A087WPA0 | Lbhd1  | LBH domain-containing 1                                                                                                 | -3.062 | 0.000 |
| 166 | Q3TL58     | Skp1   | S-phase kinase-associated protein 1                                                                                     | -3.117 | 0.000 |
| 167 | Q542N8     | Palm   | Uncharacterized protein                                                                                                 | -3.287 | 0.000 |
| 168 | P0DP28     | Calm3  | Calmodulin-3                                                                                                            | -4.184 | 0.004 |
| 169 | Q91XV3     | Basp1  | Brain acid soluble protein 1 (22 kDa neuronal tissue-enriched acidic protein) (Neuronal axonal membrane protein NAP-22) | -4.443 | 0.000 |
